# Supplementary material for: The Prevalence of Species and Strains in the Human Microbiome: A Resource for Experimental Efforts
Source: PubMed Central journal article supplement (PMC4020798; doi:10.1371/journal.pone.0097279), 2014-05-14

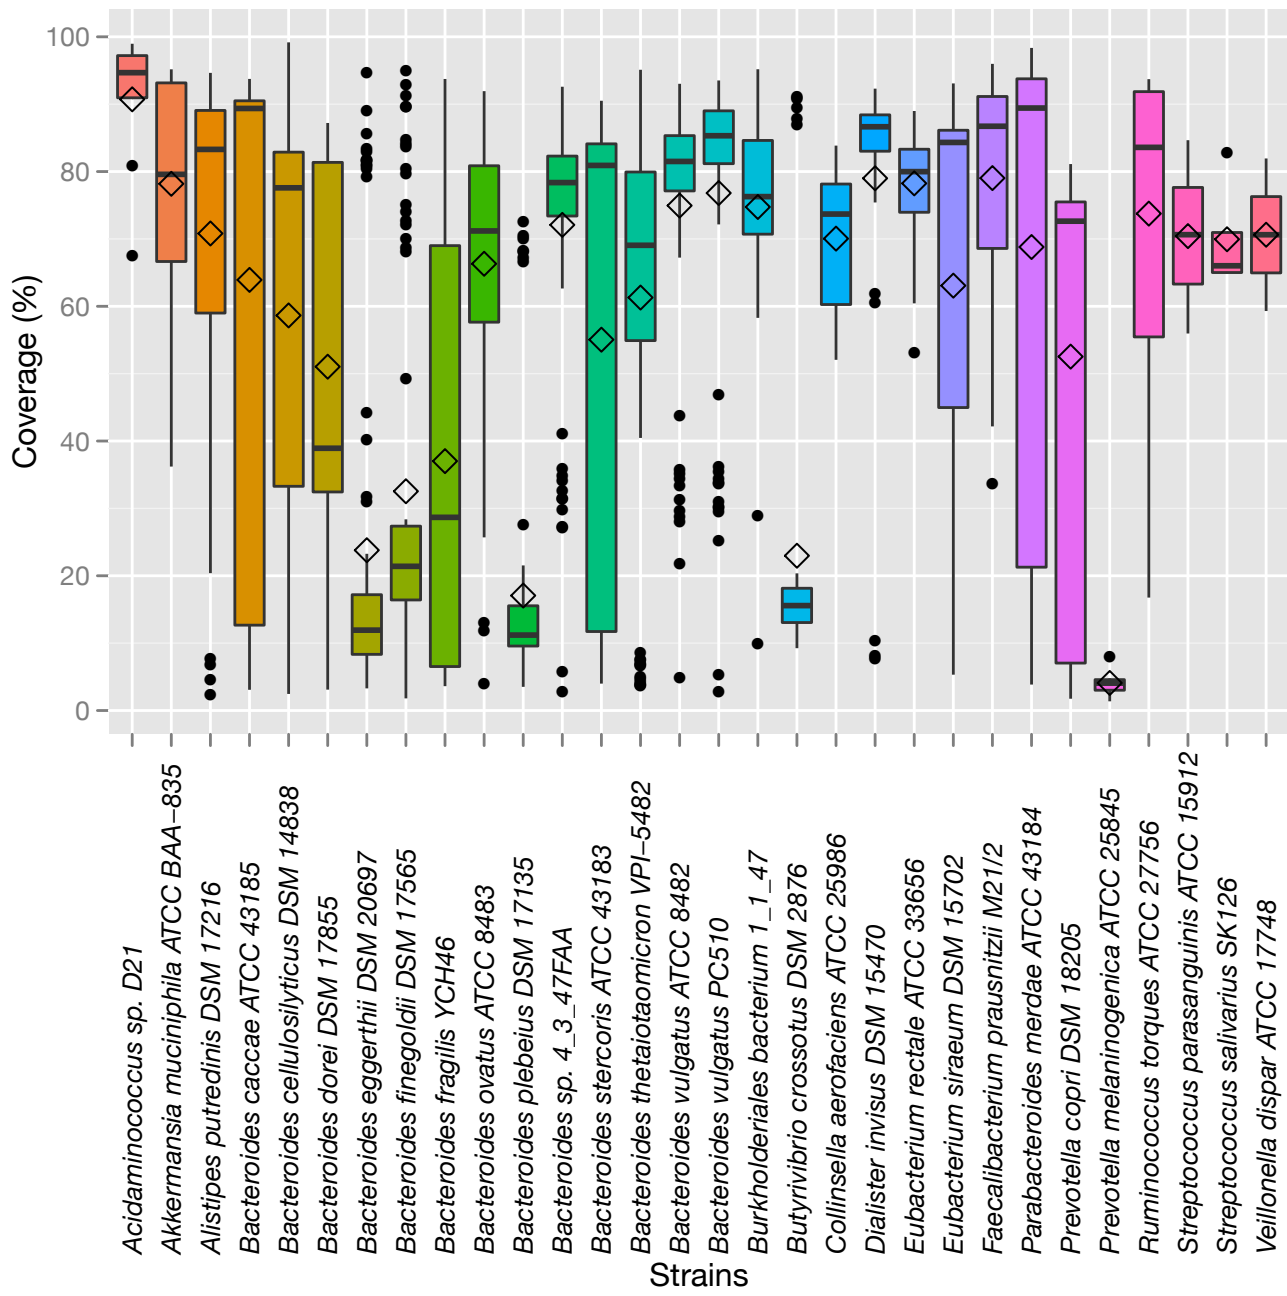

# *Acidaminococcus* sp. D21

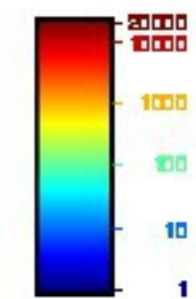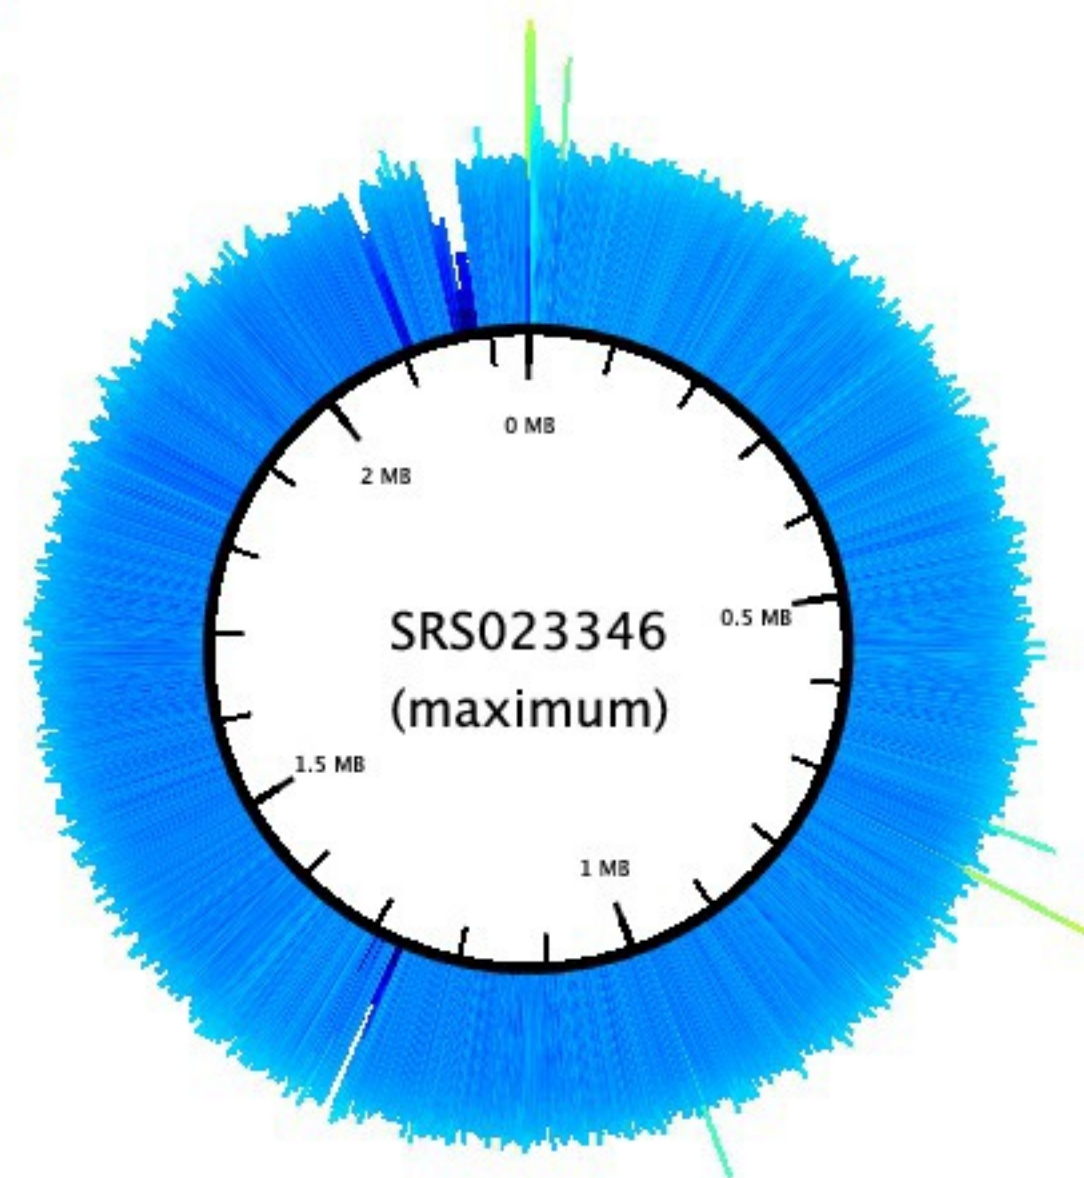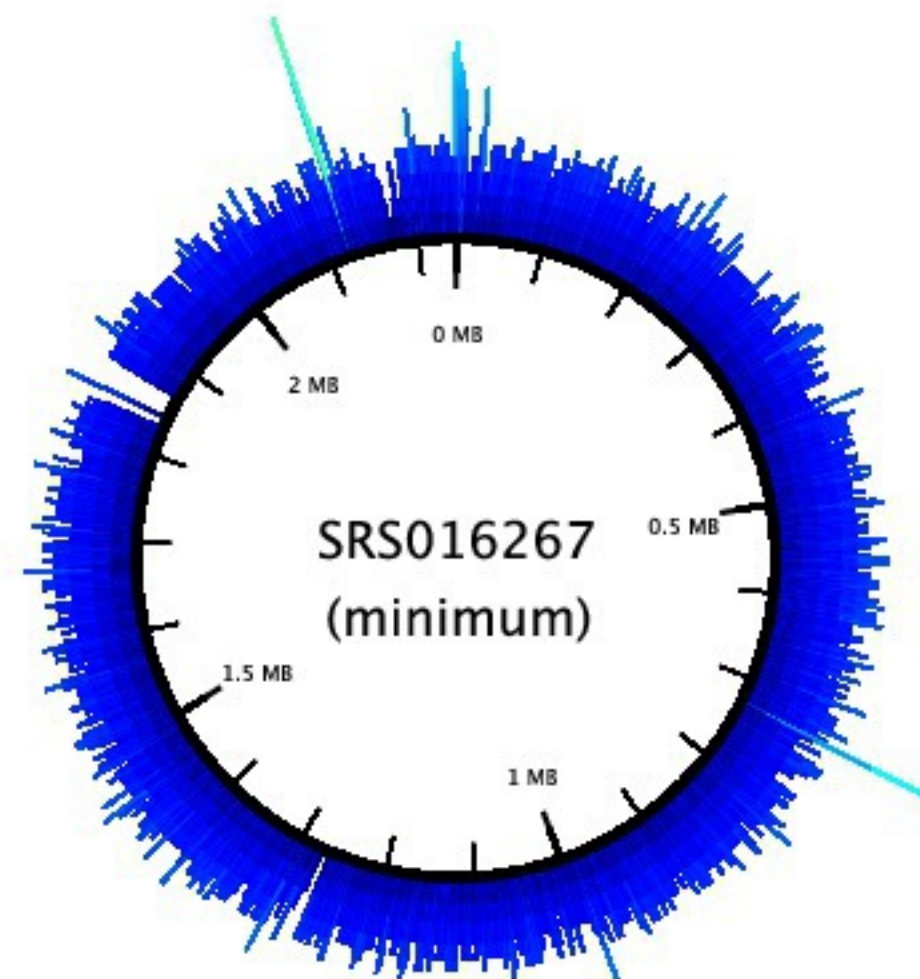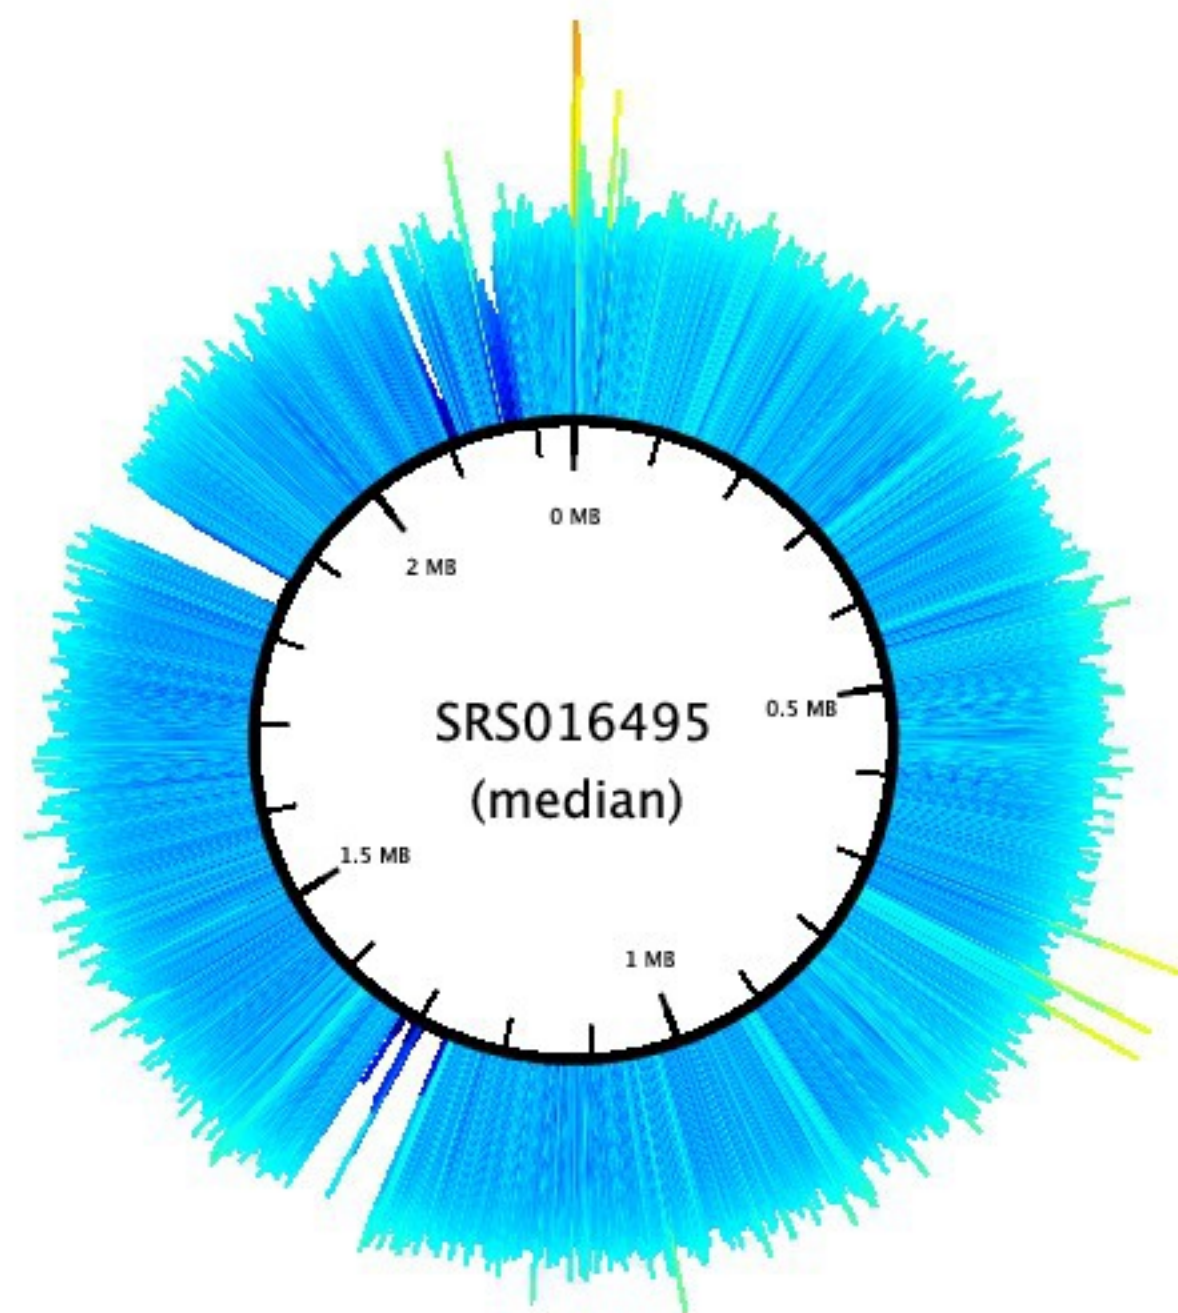

# *Akkermansia muciniphila* ATCC BAA-835

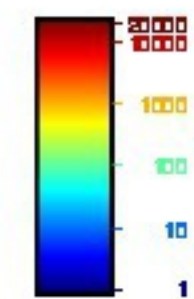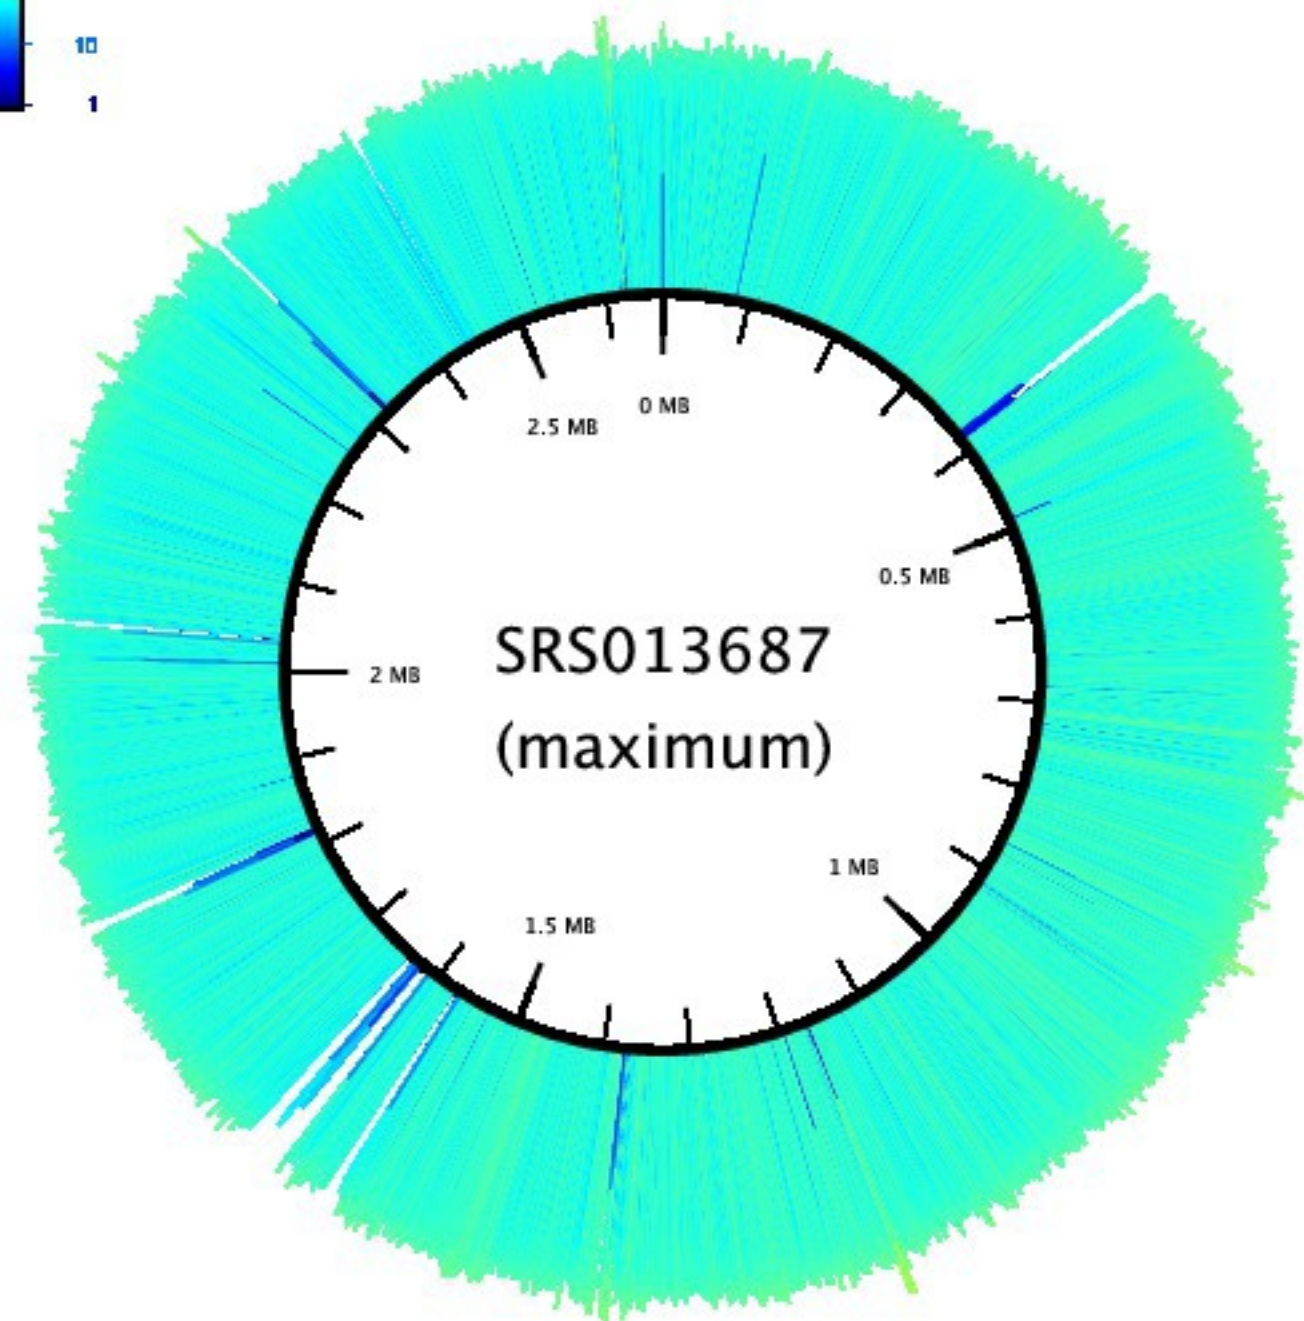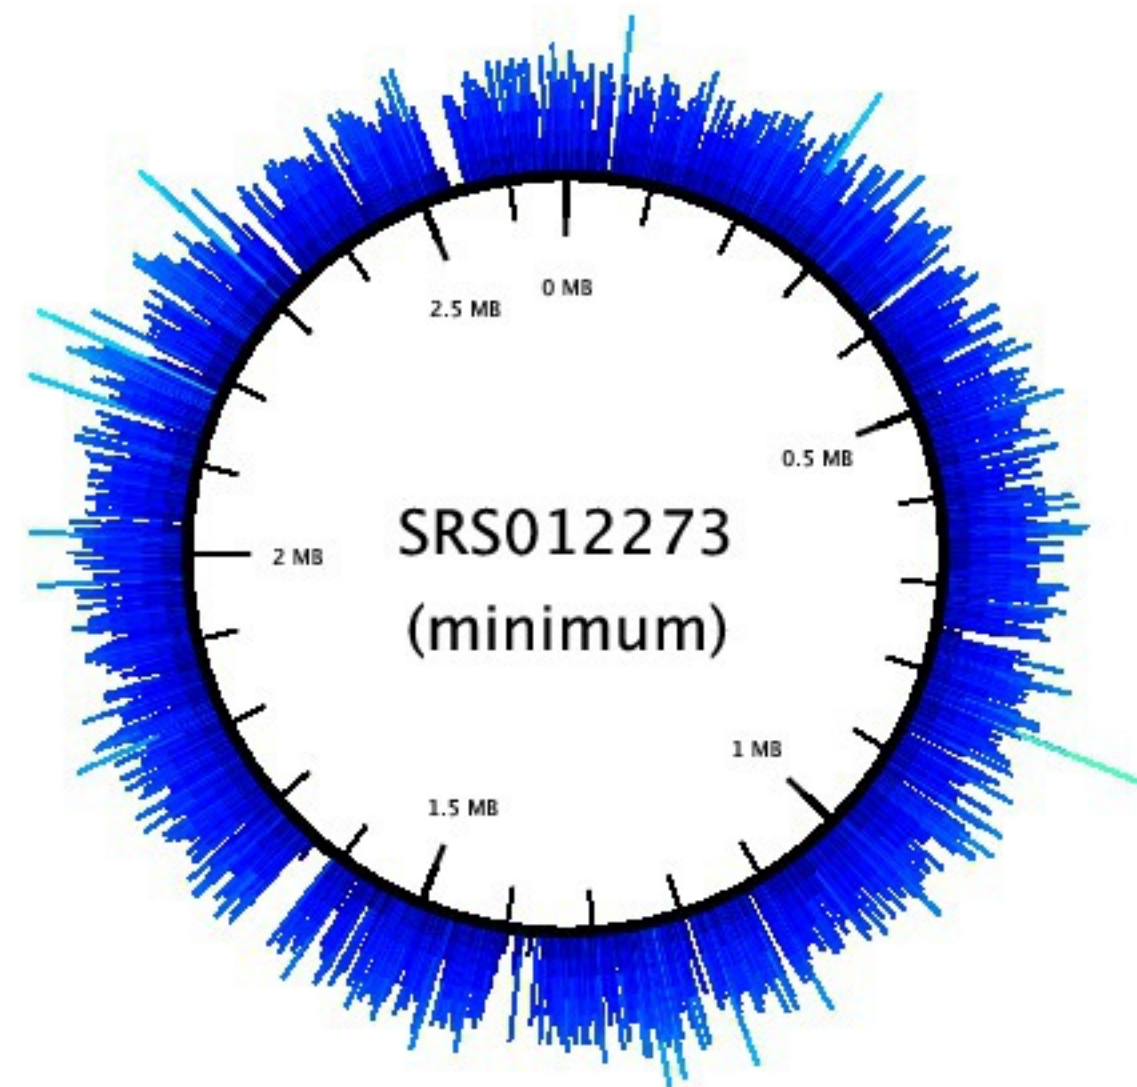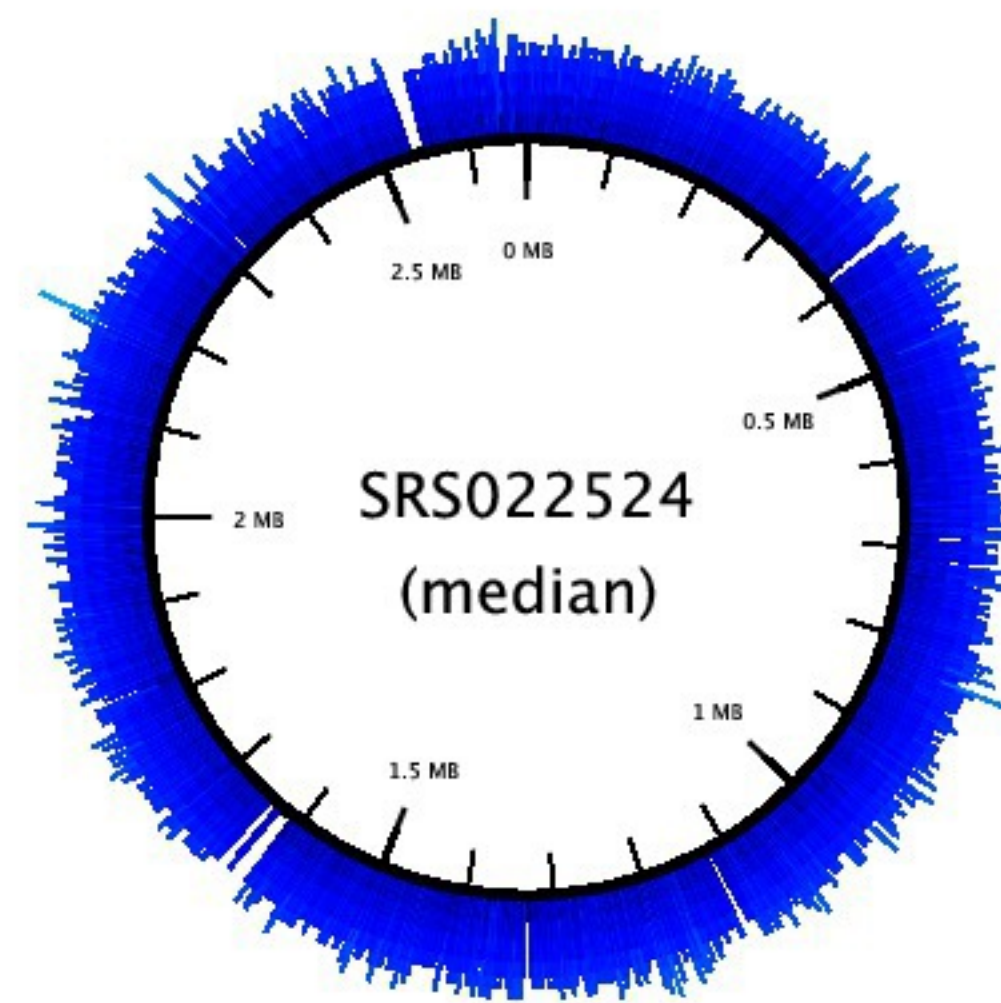

# *Alistipes putredinis* DSM 17216

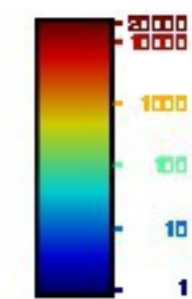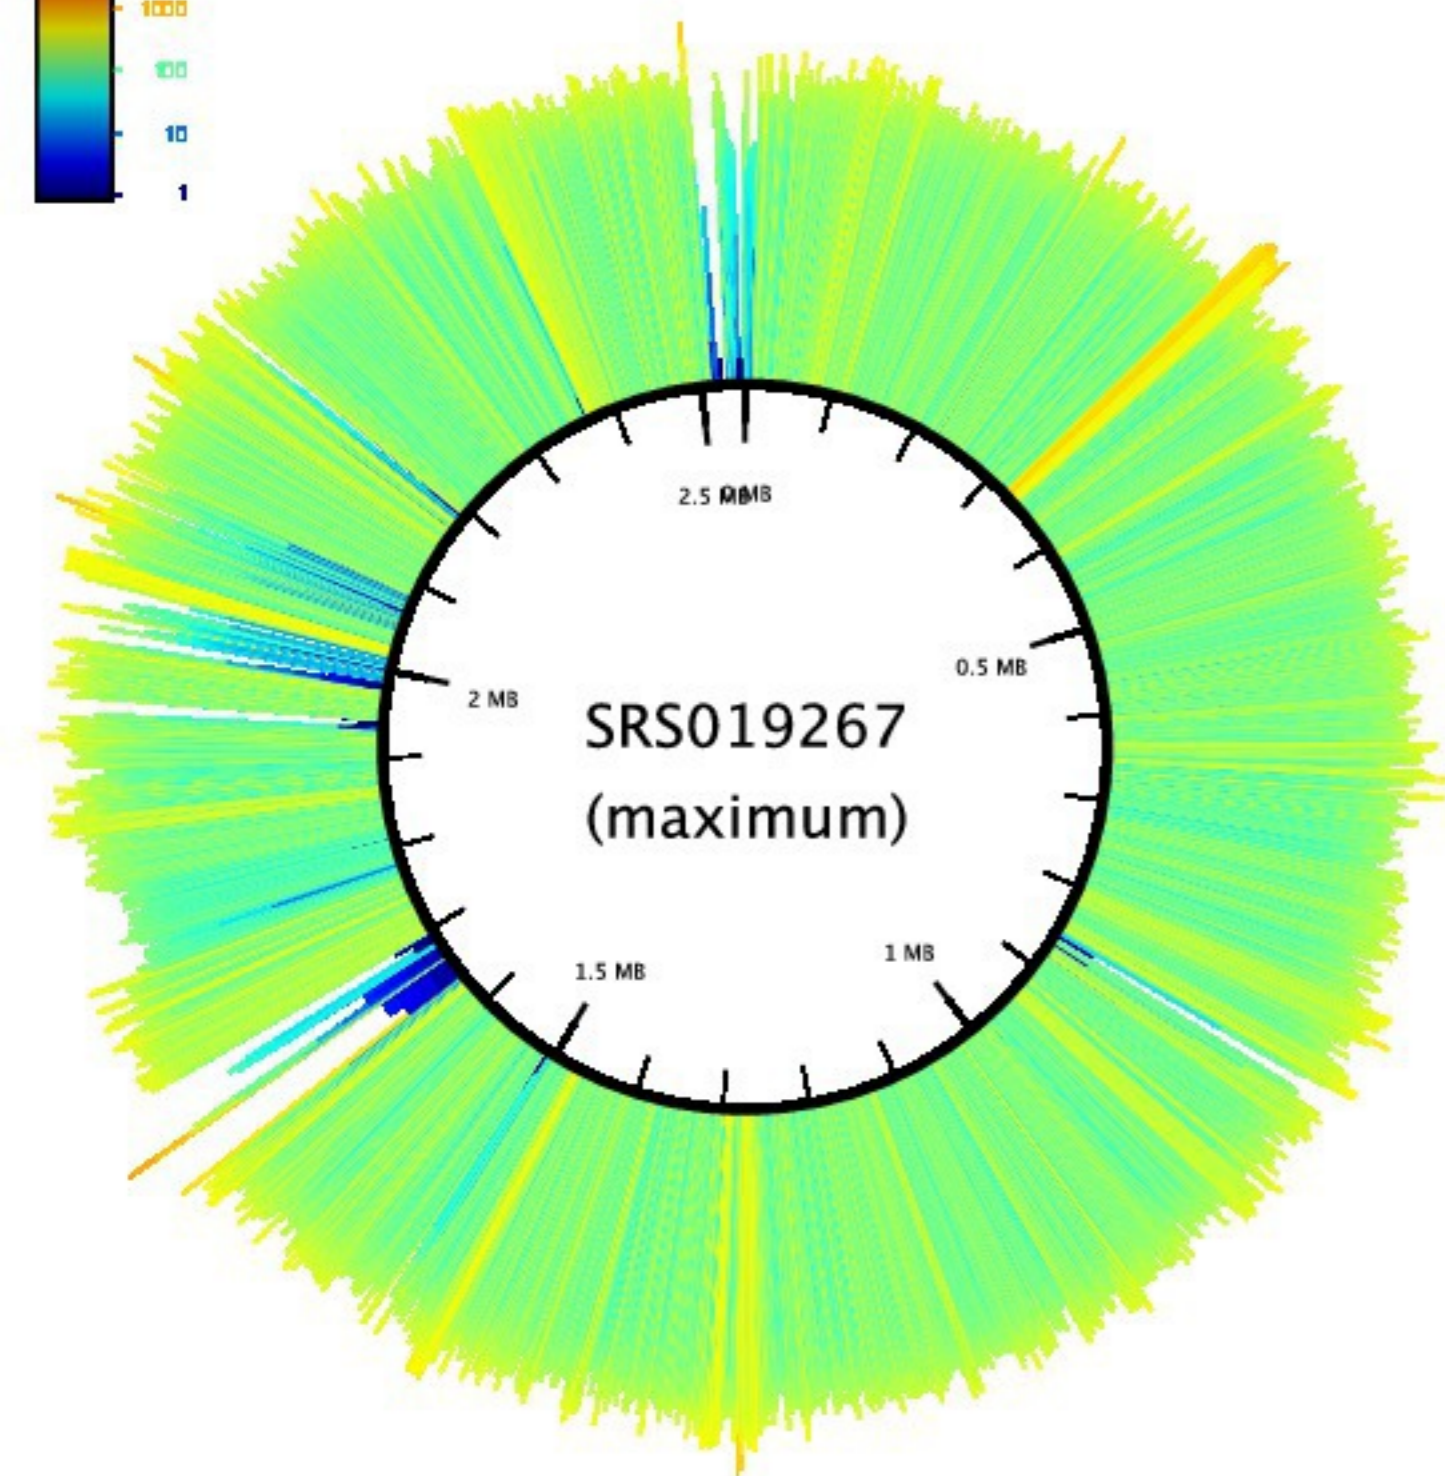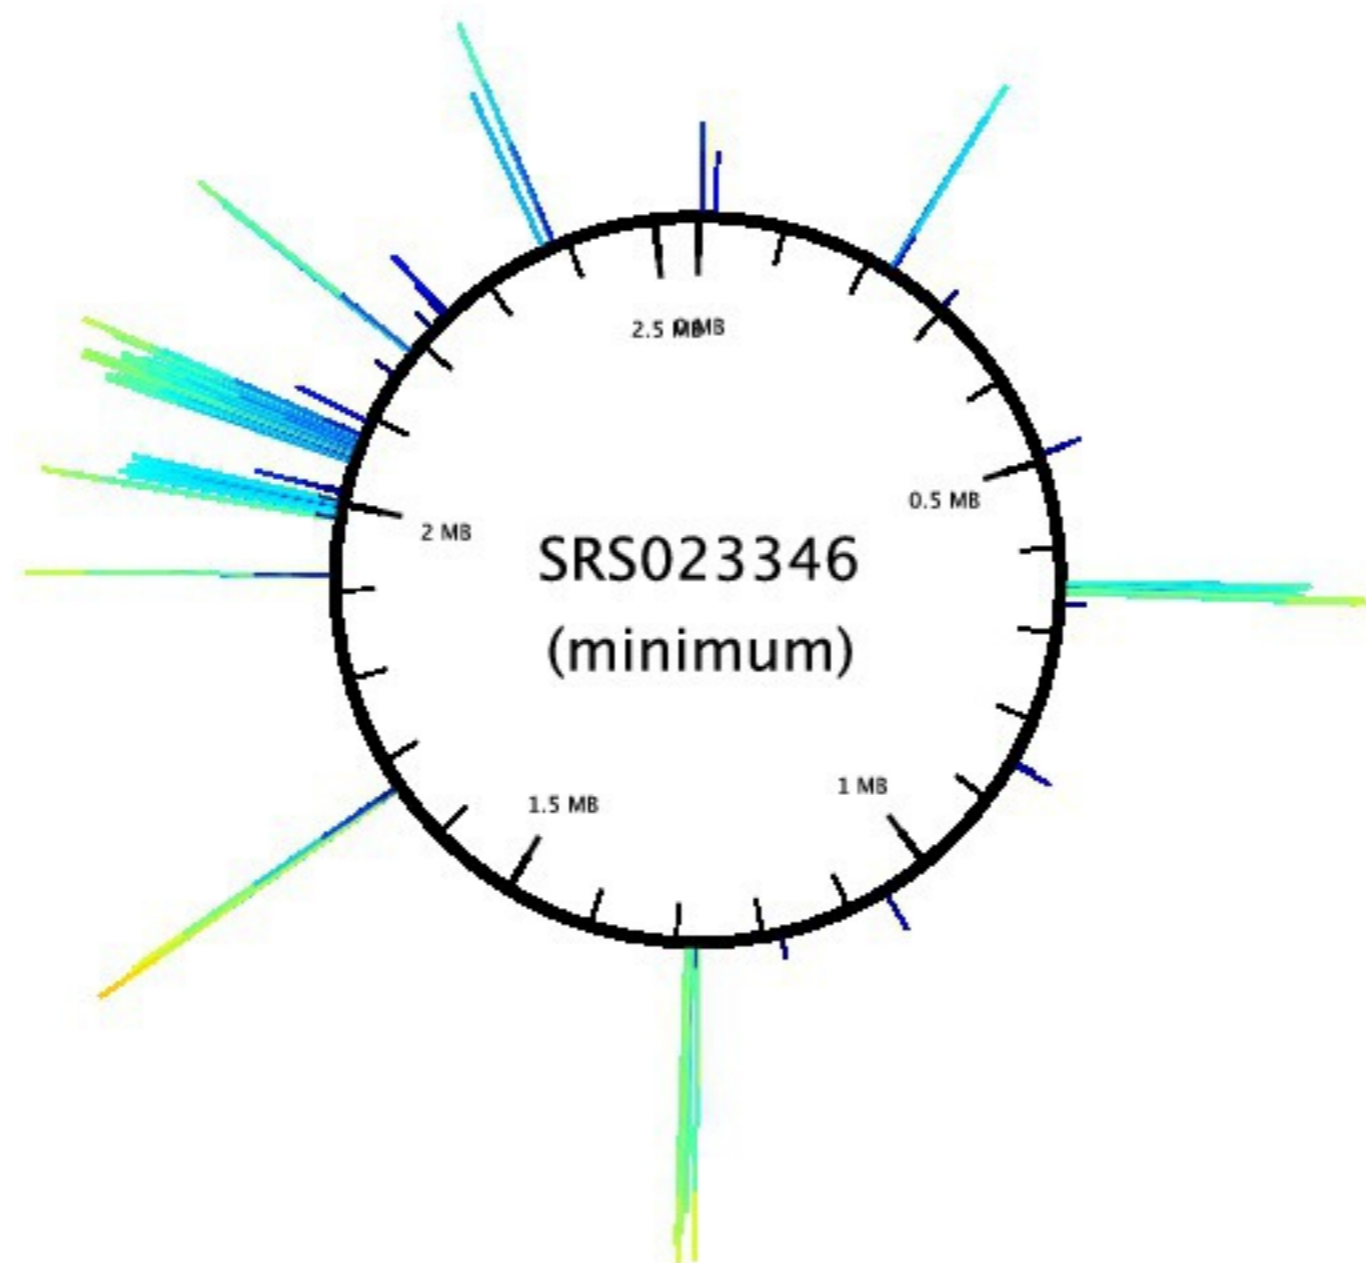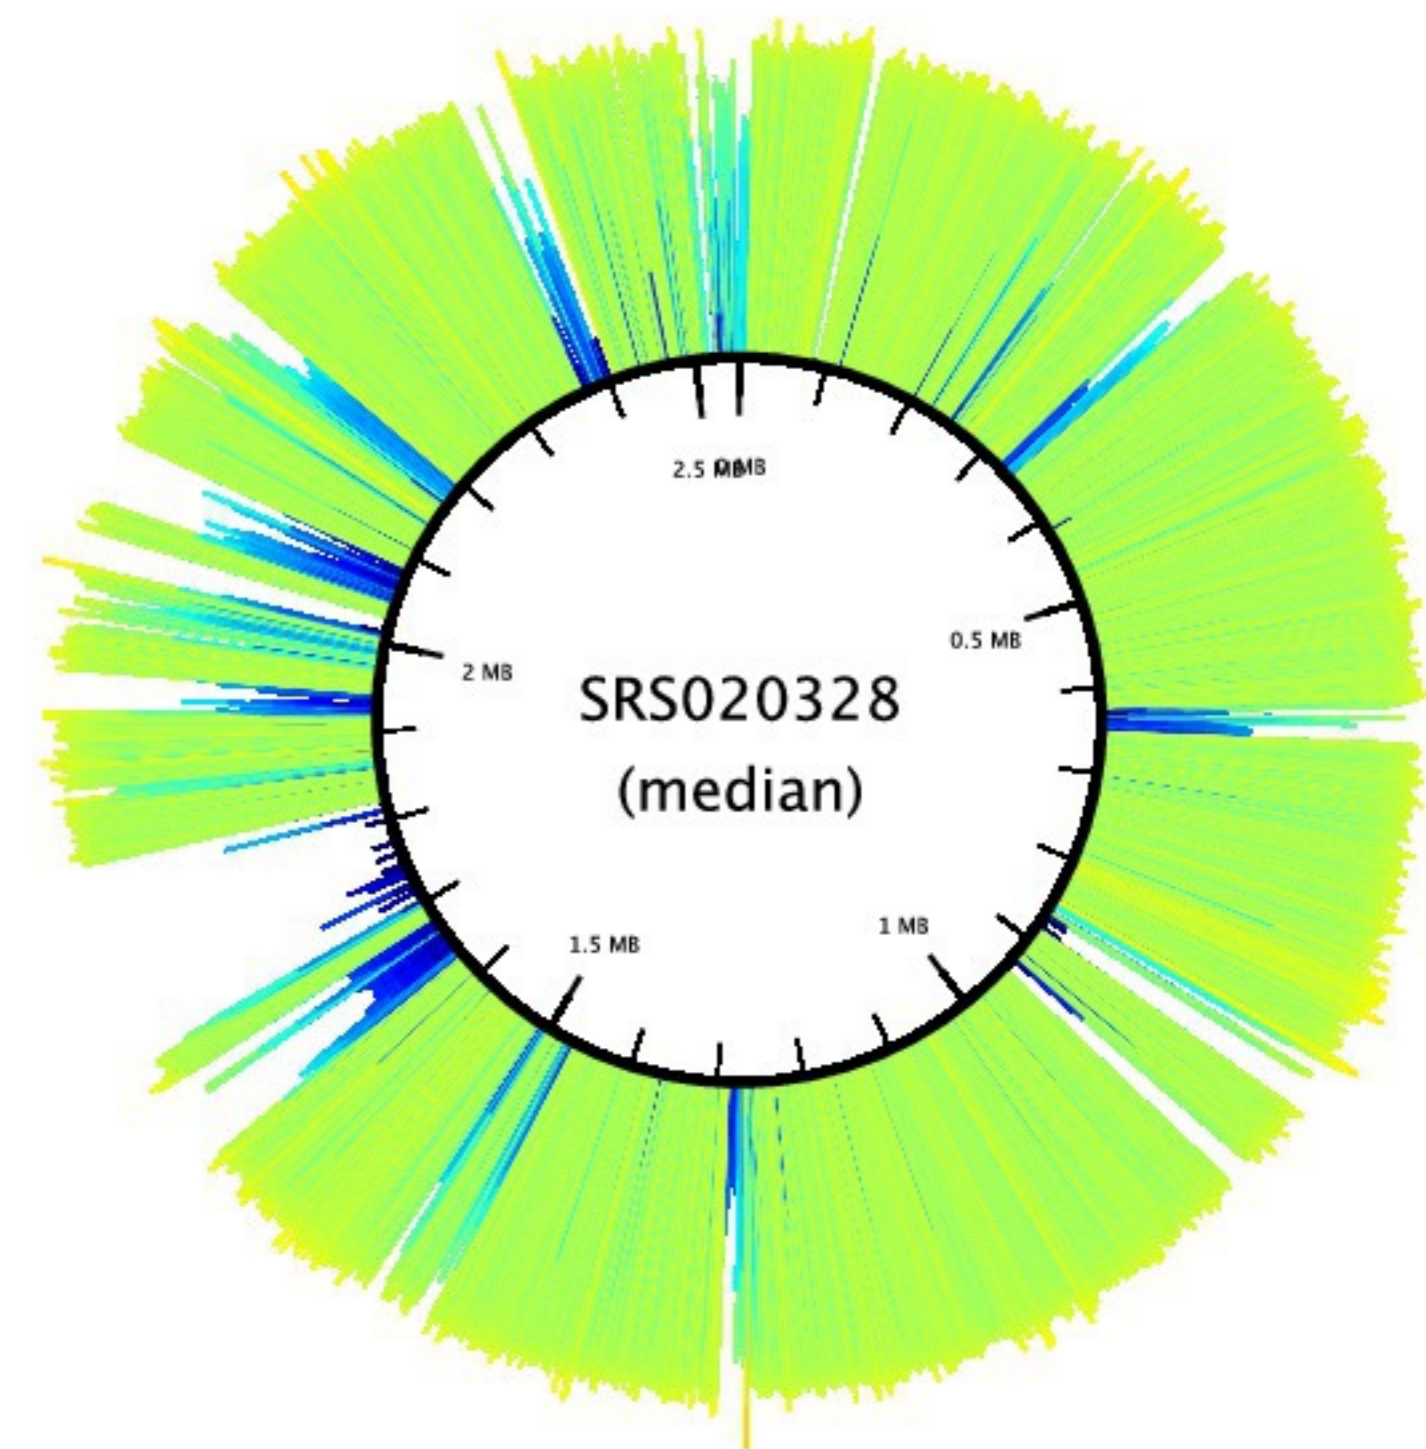

*Bacteroides caccae* ATCC 43185

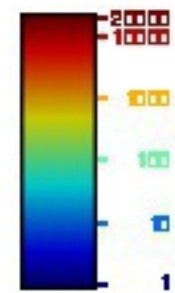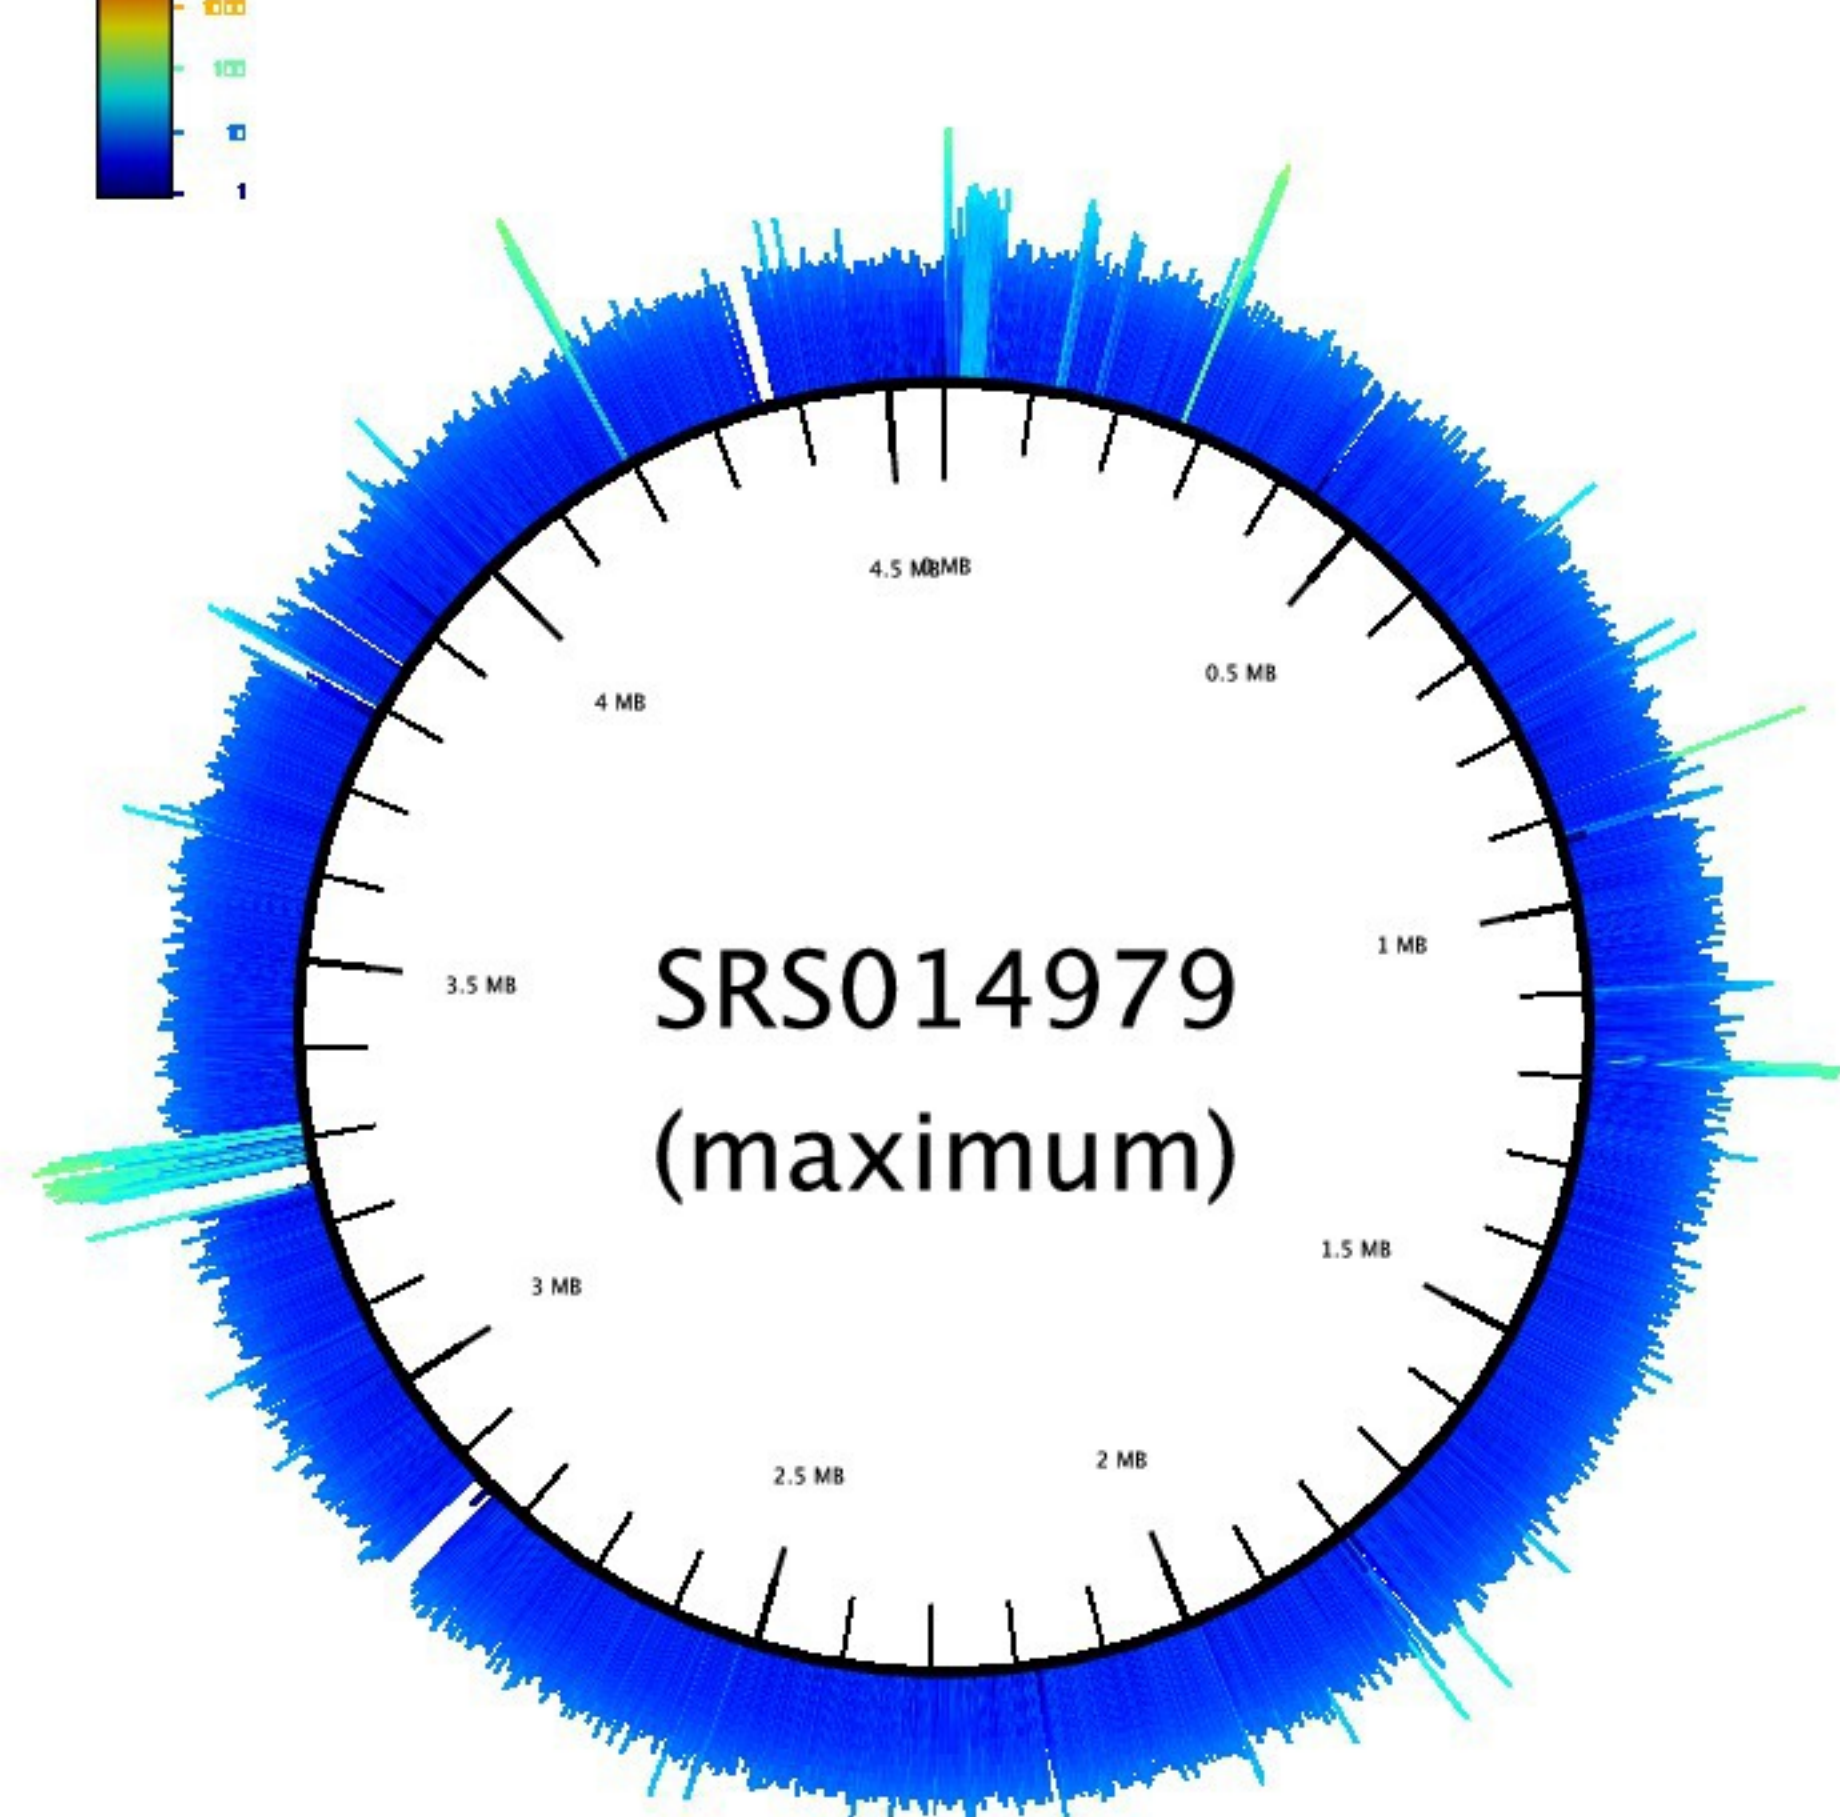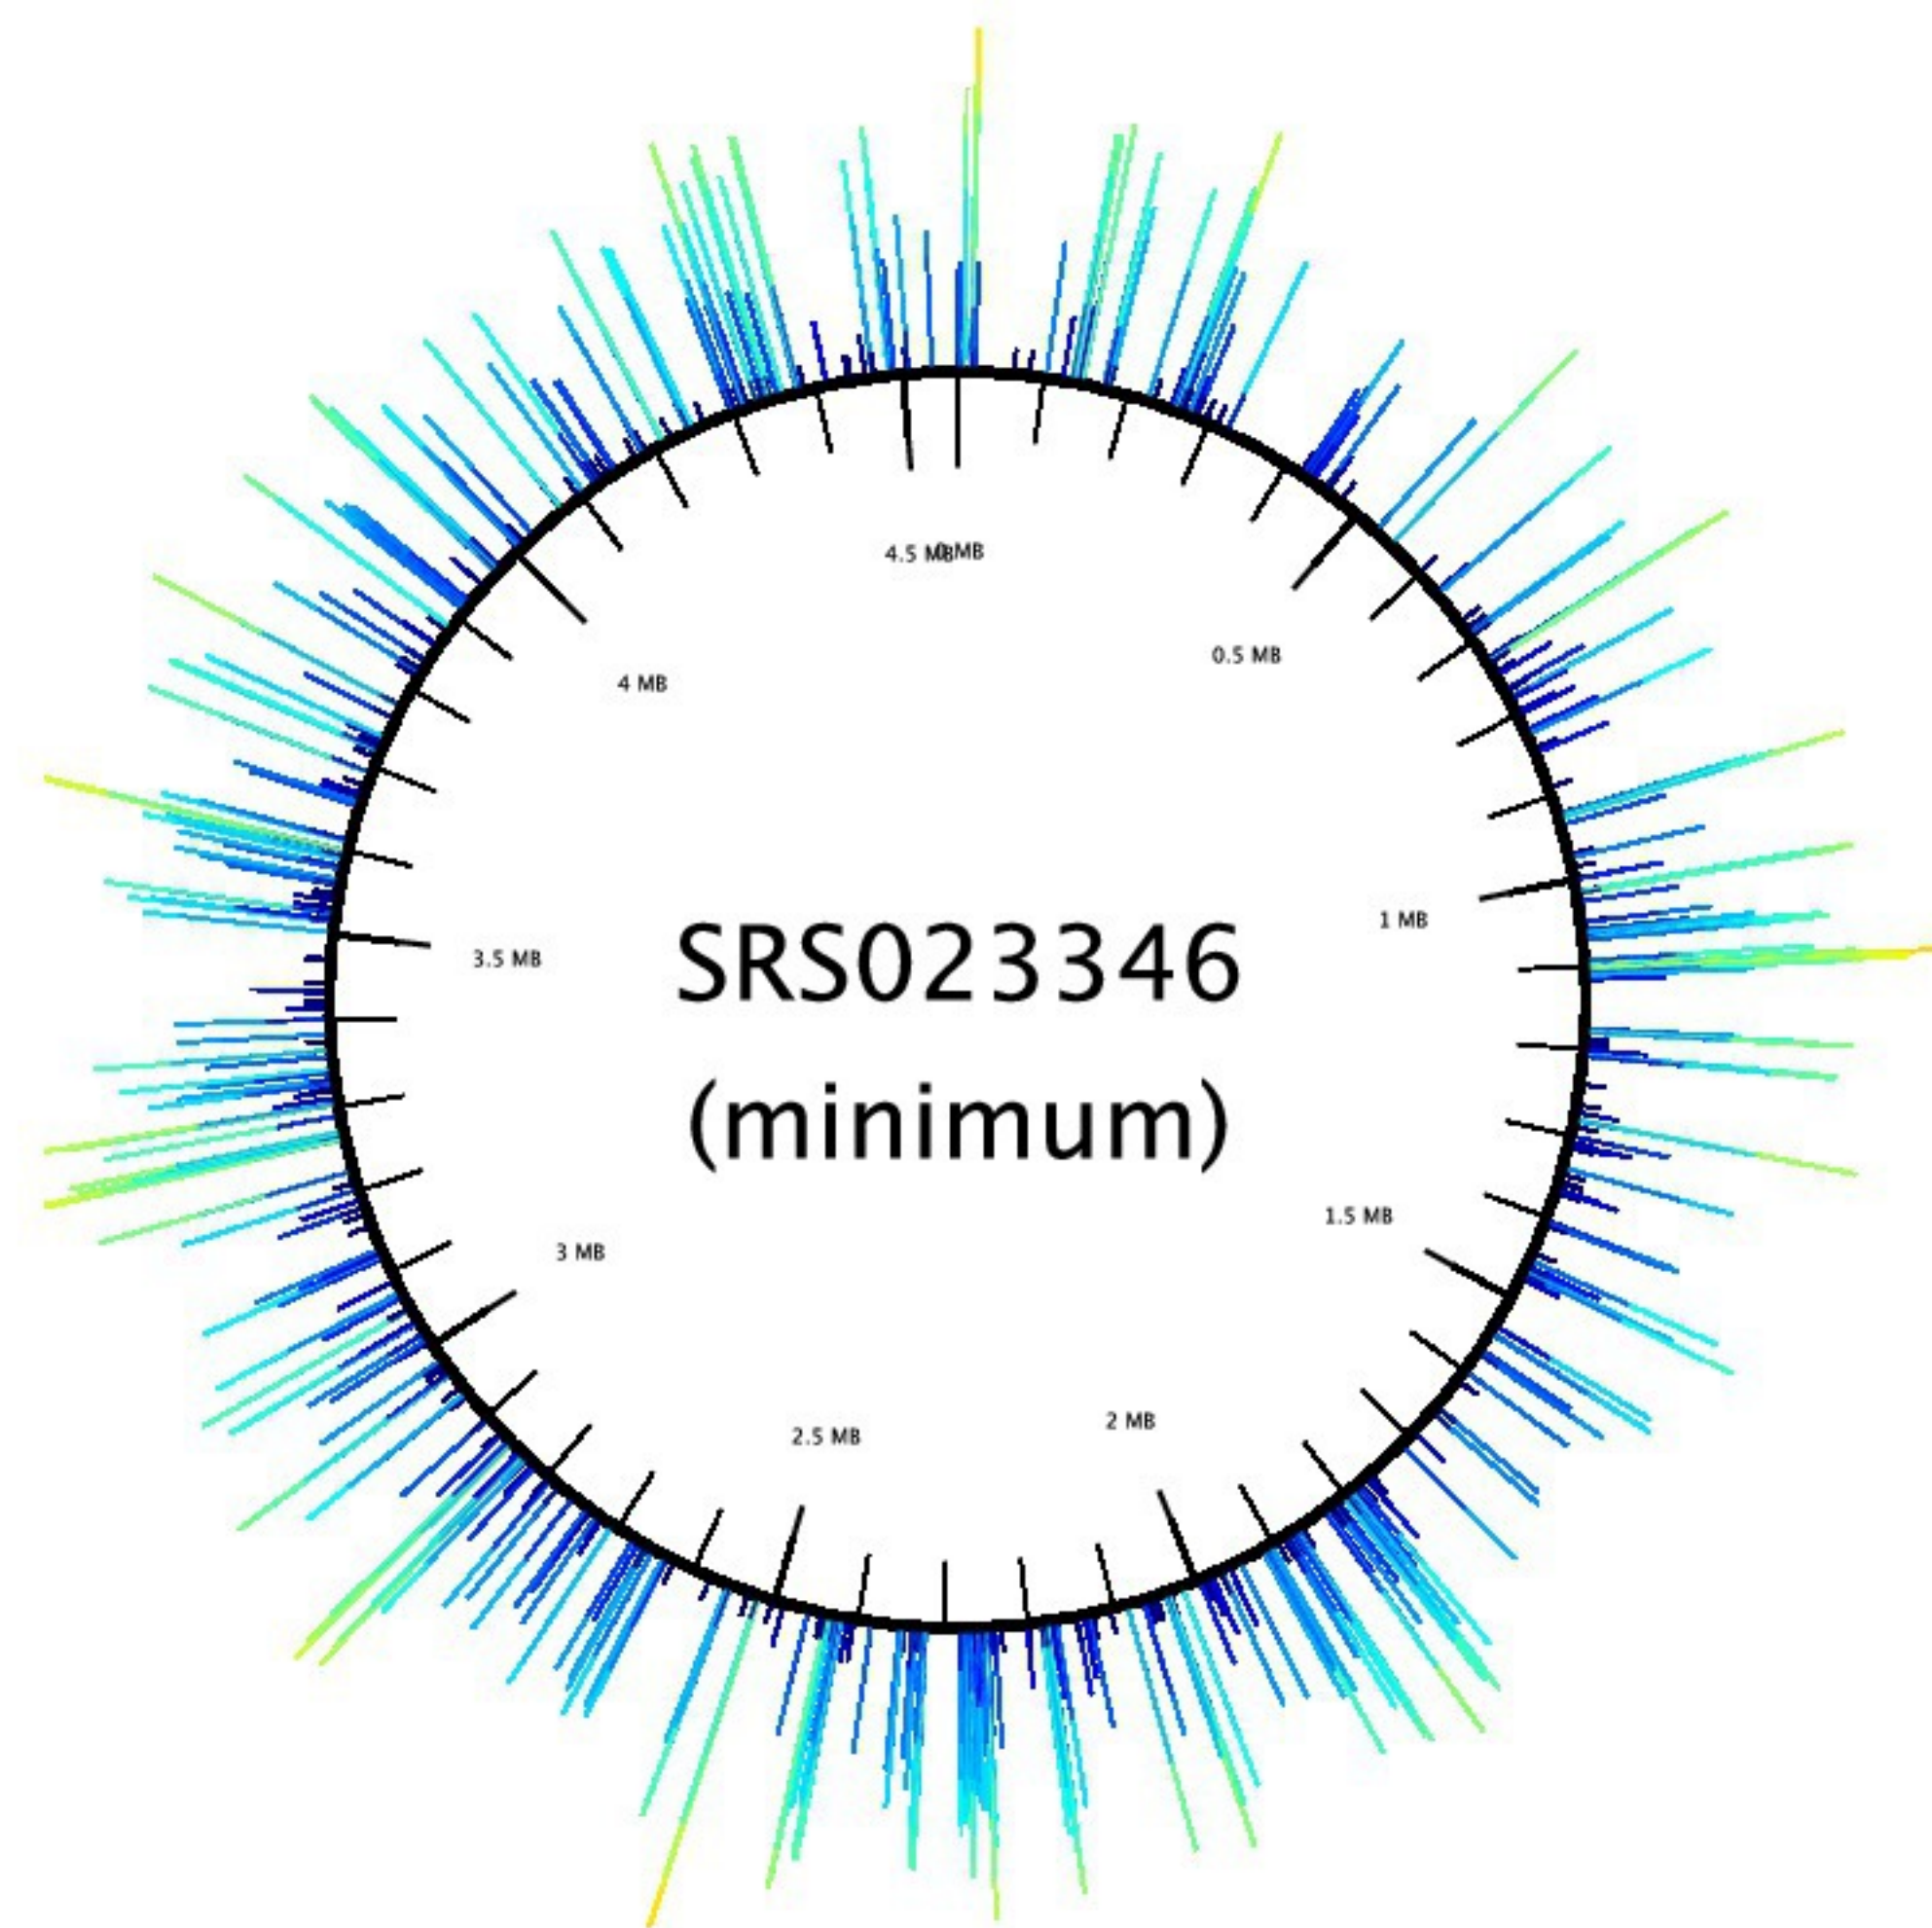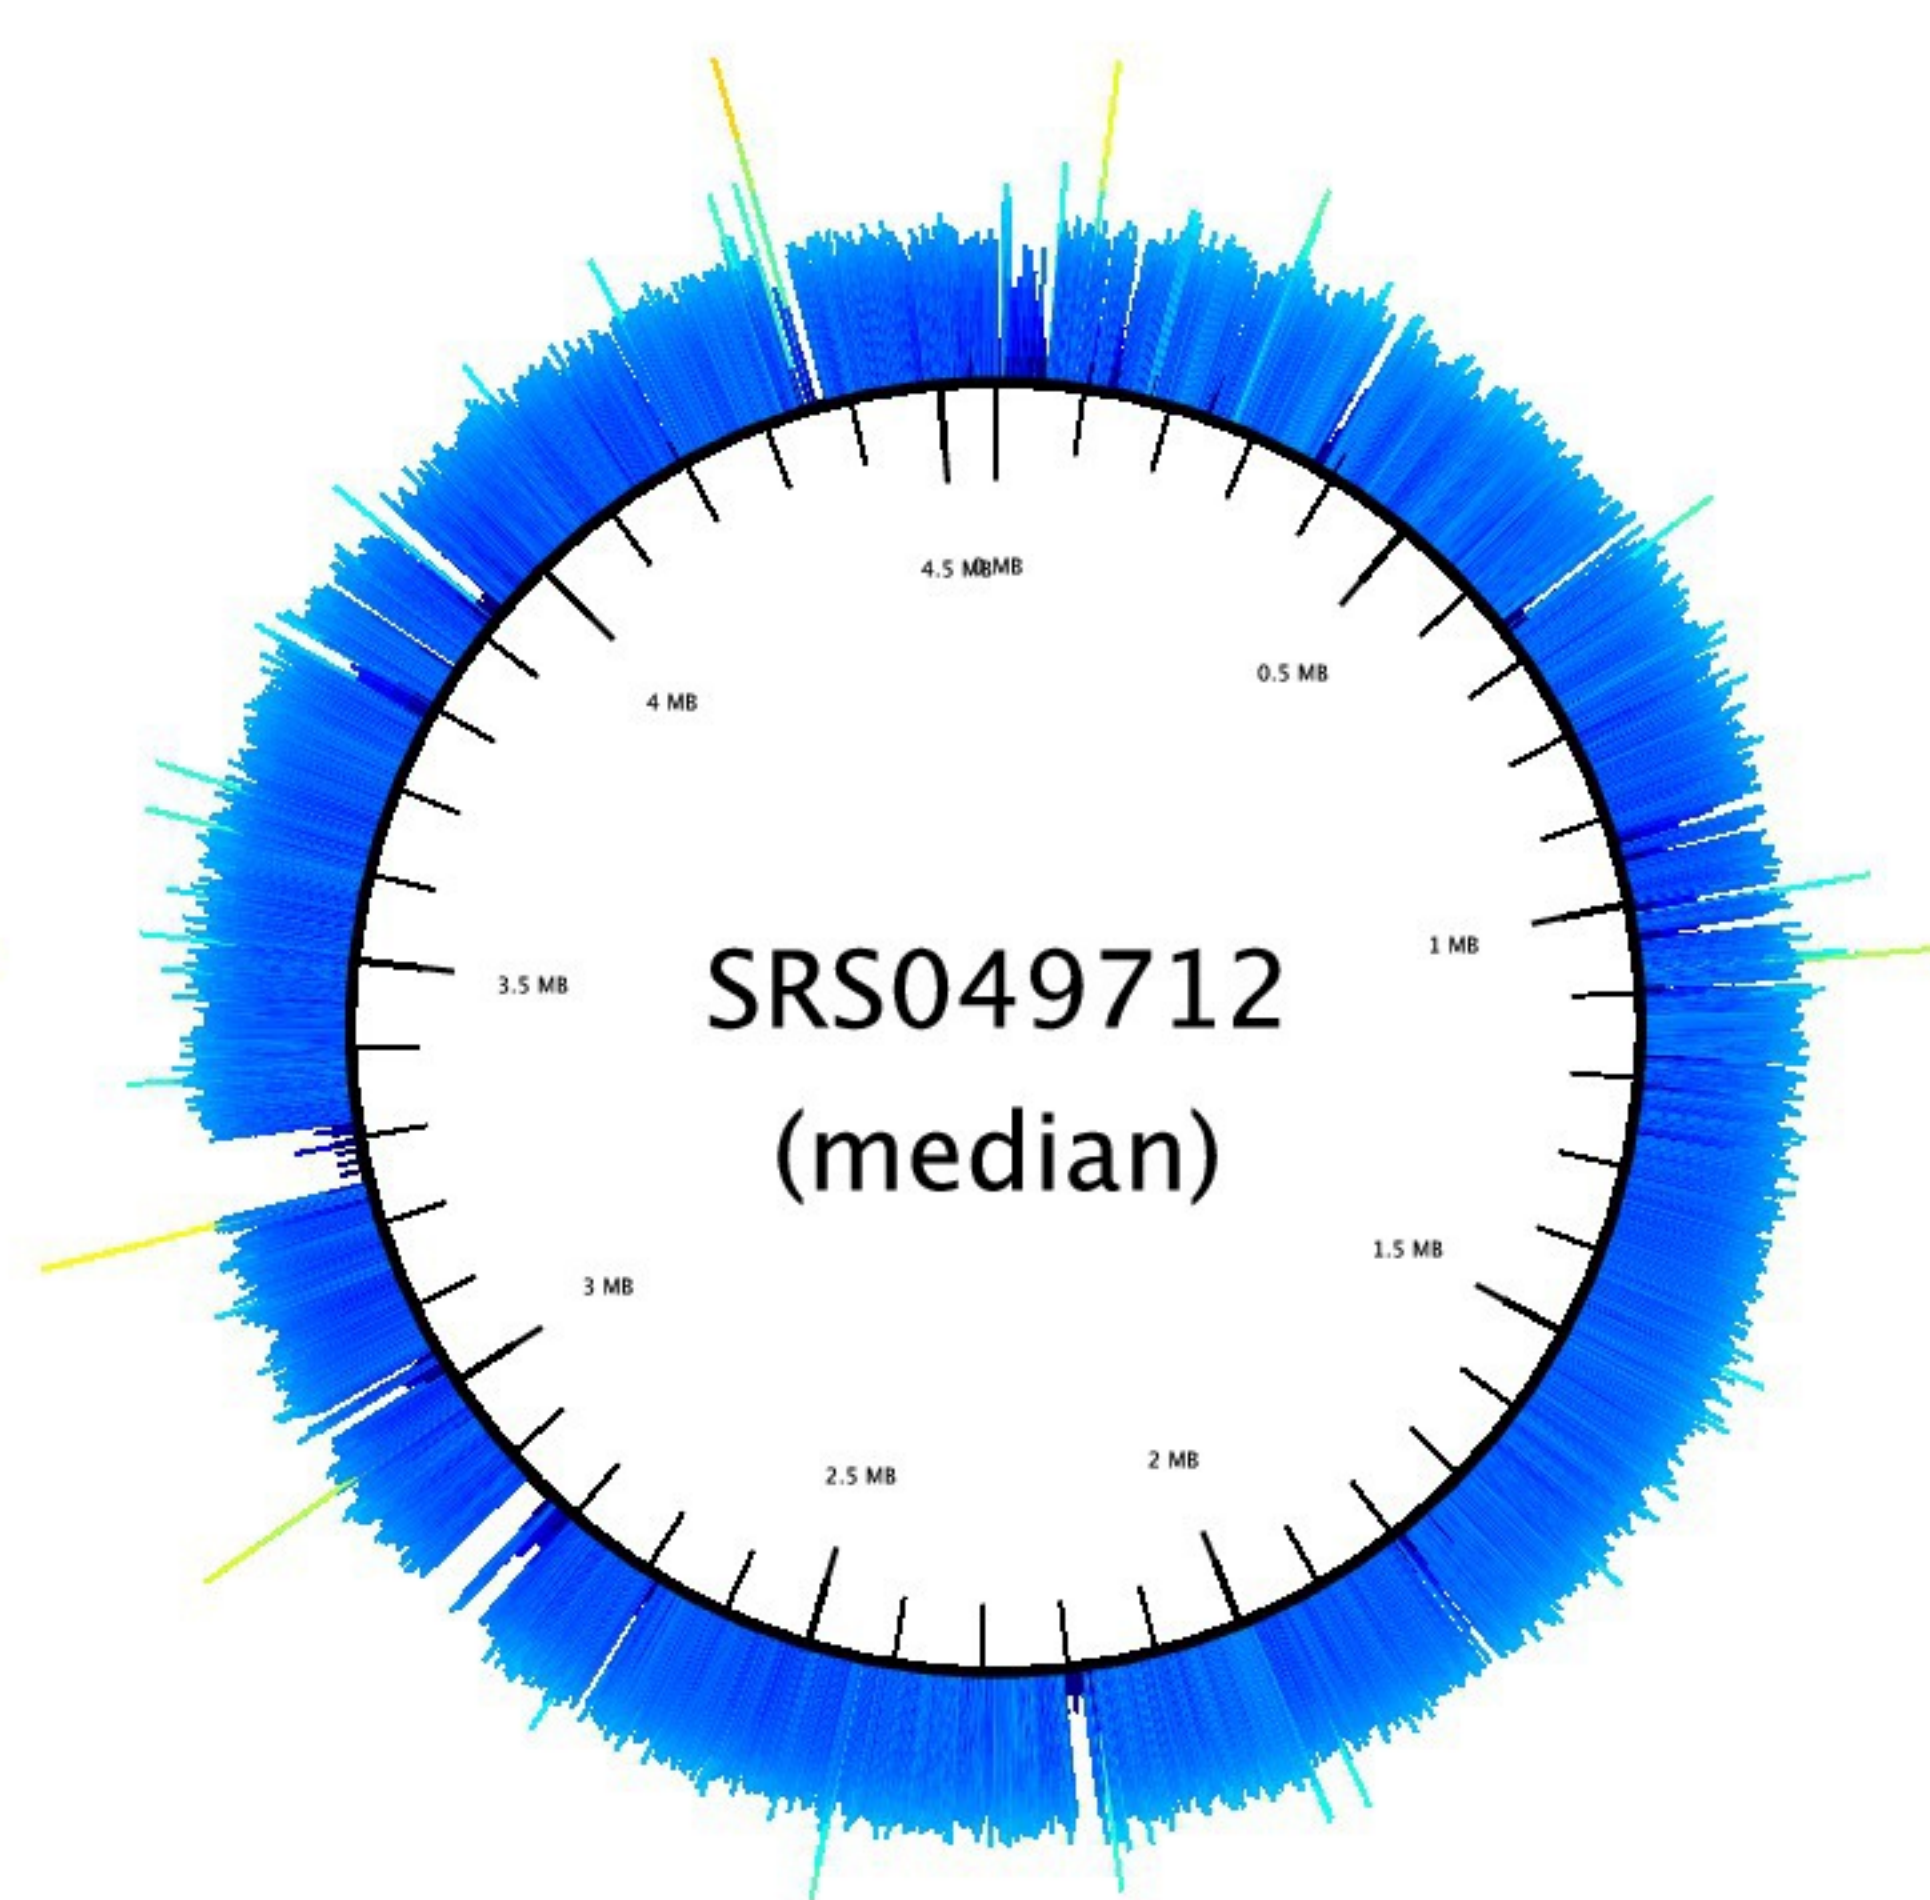

*Bacteroides cellulosilyticus* DSM 14838

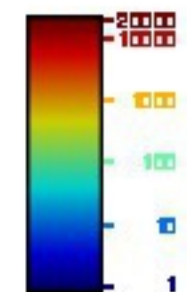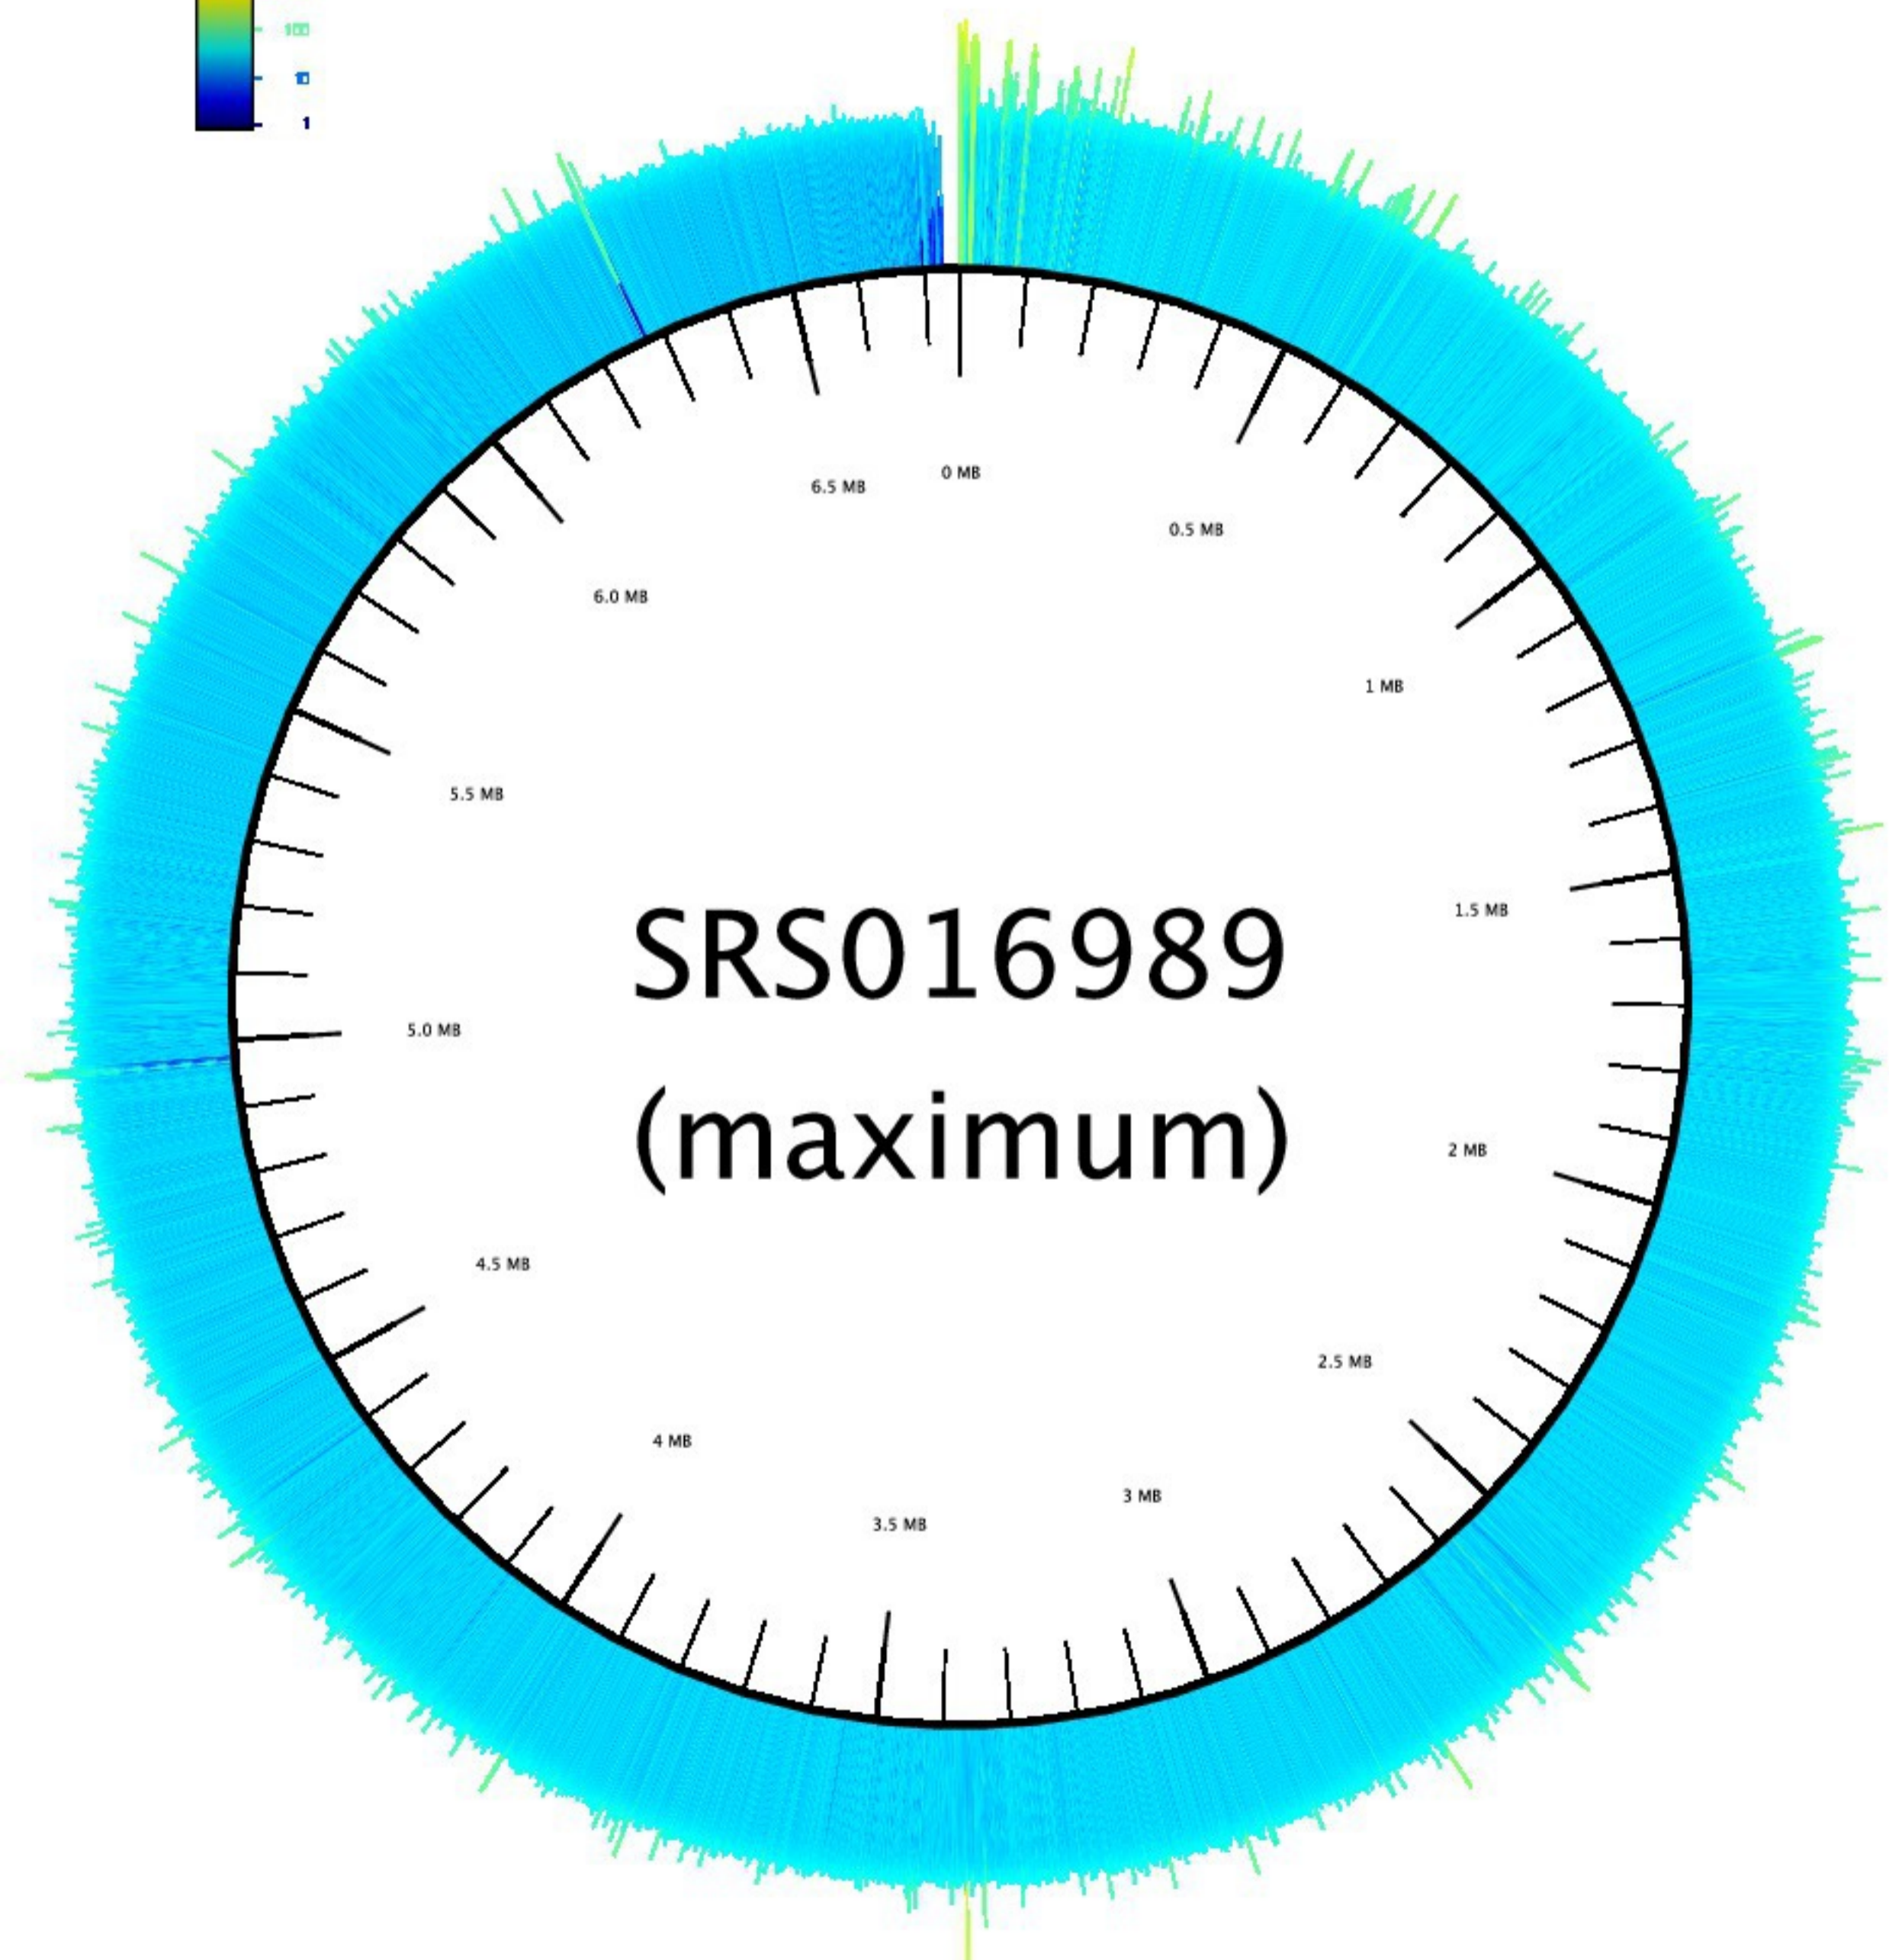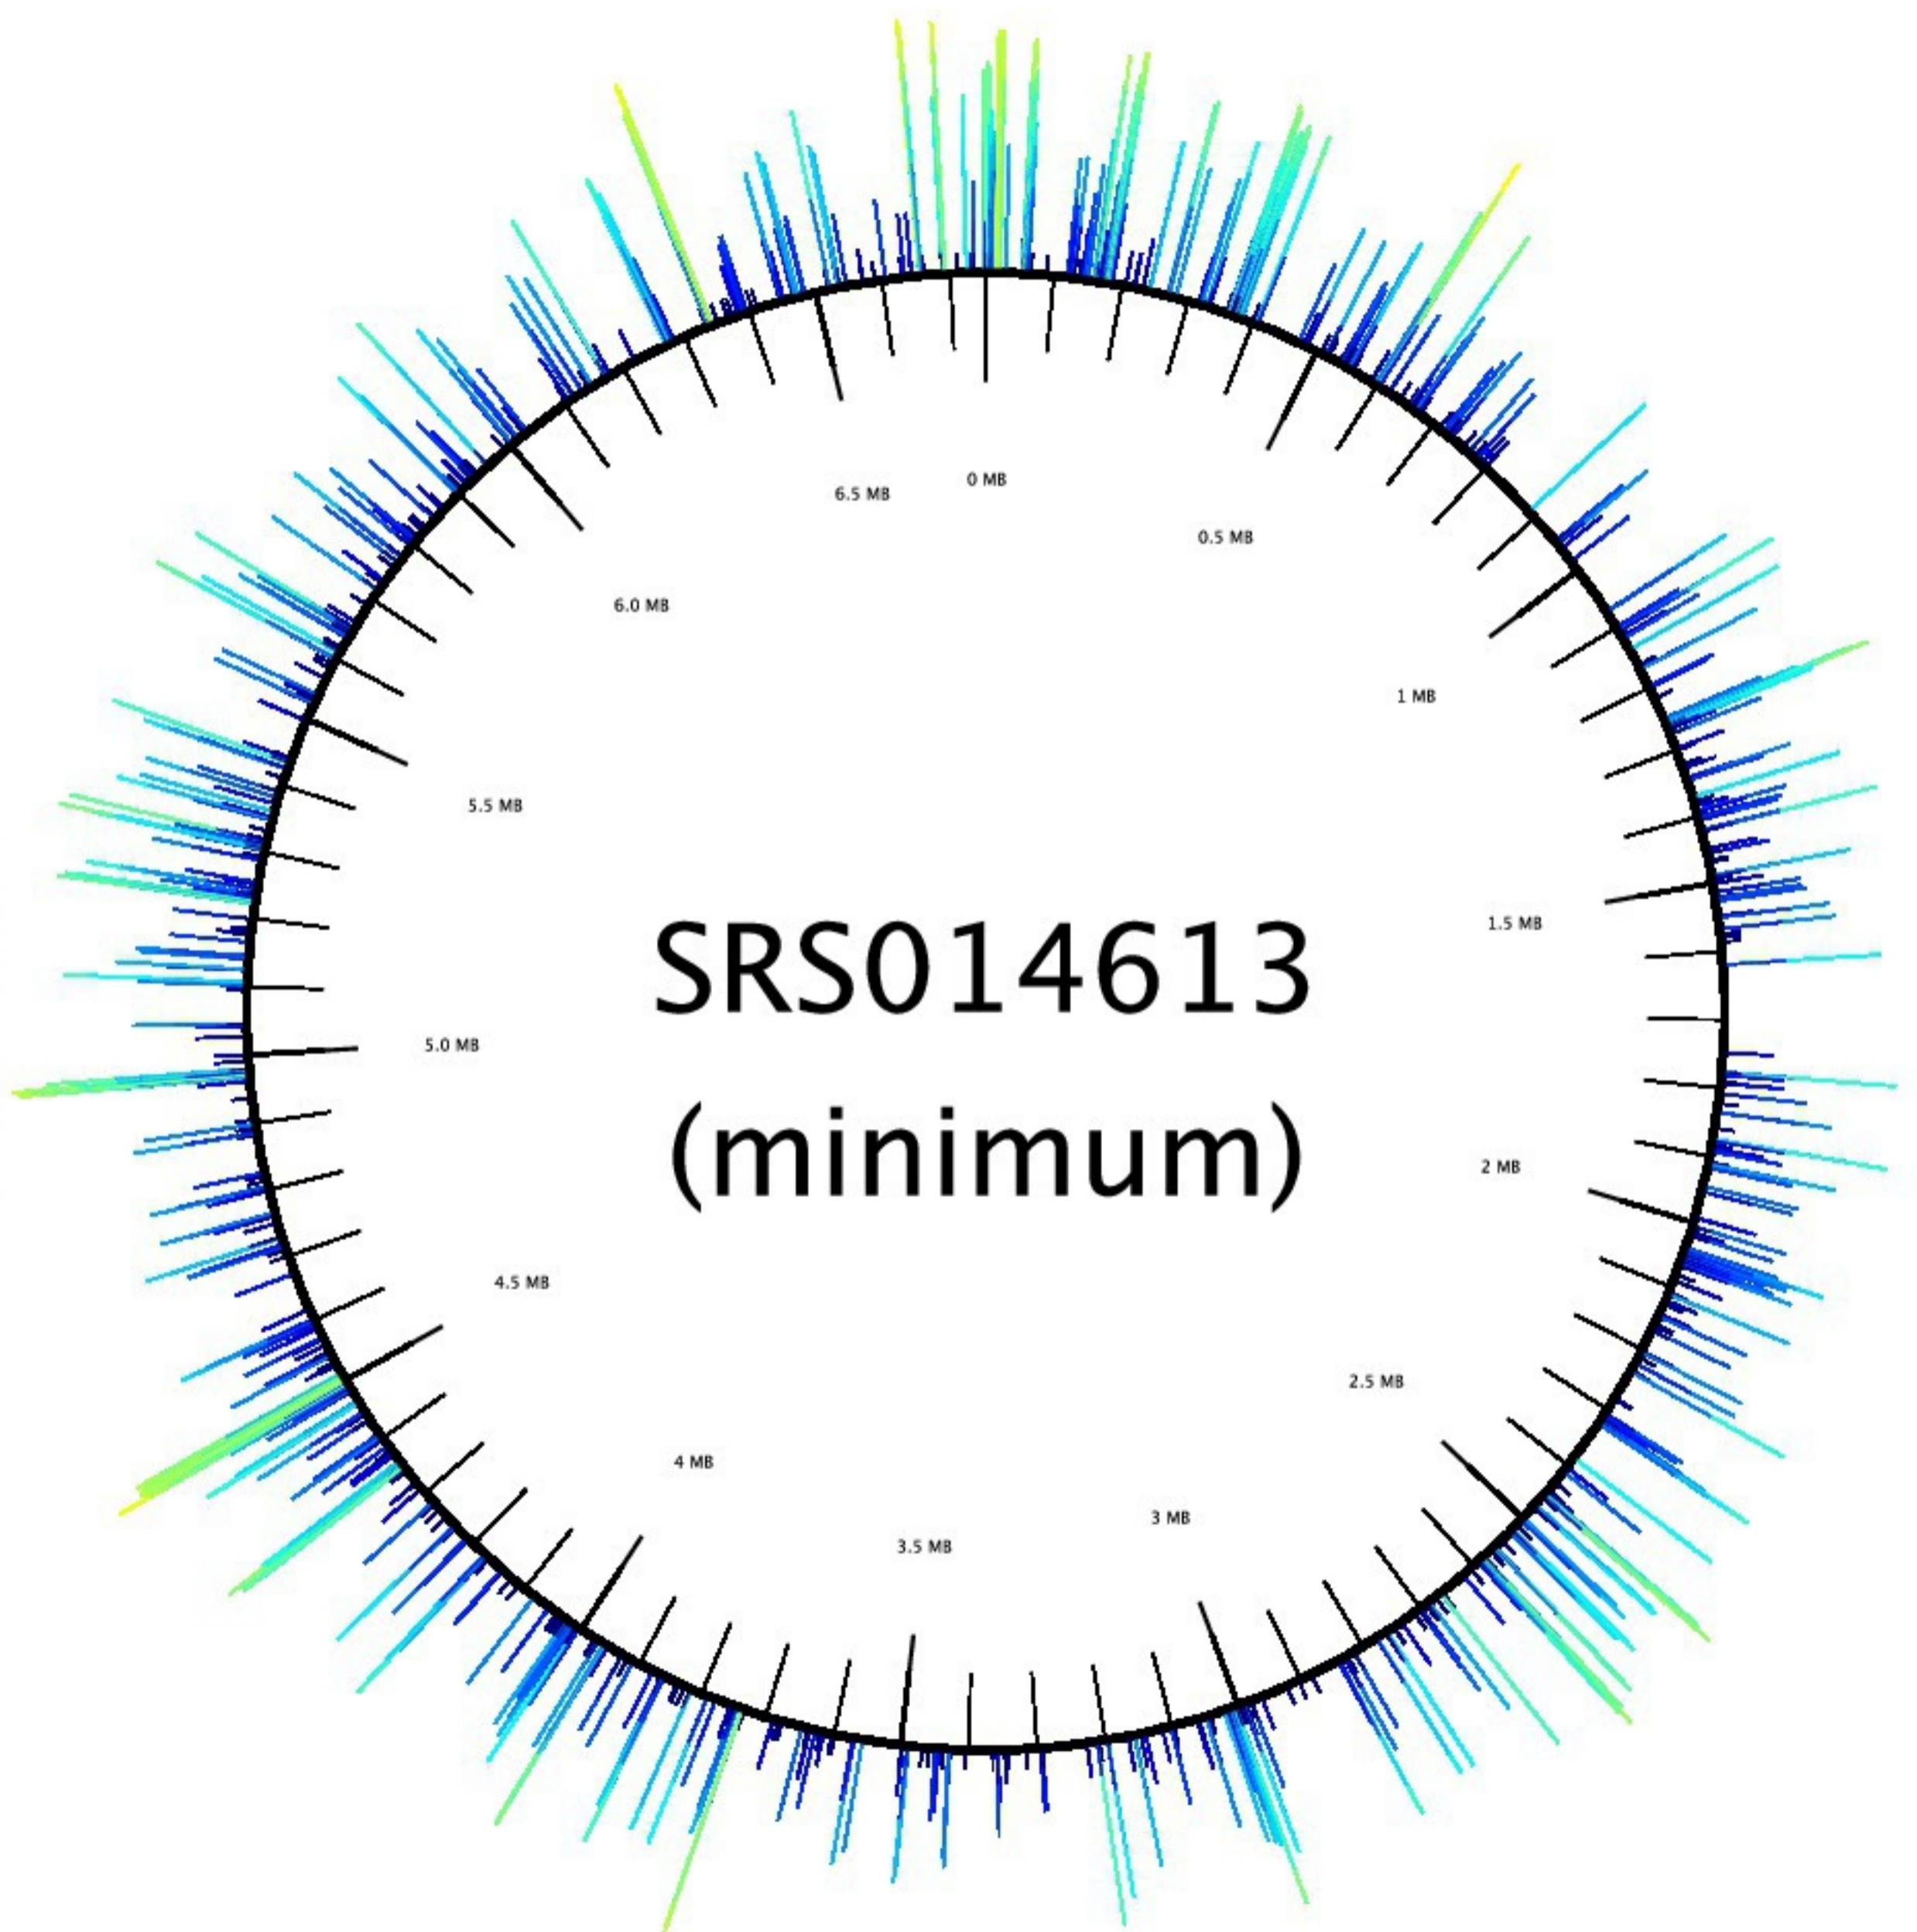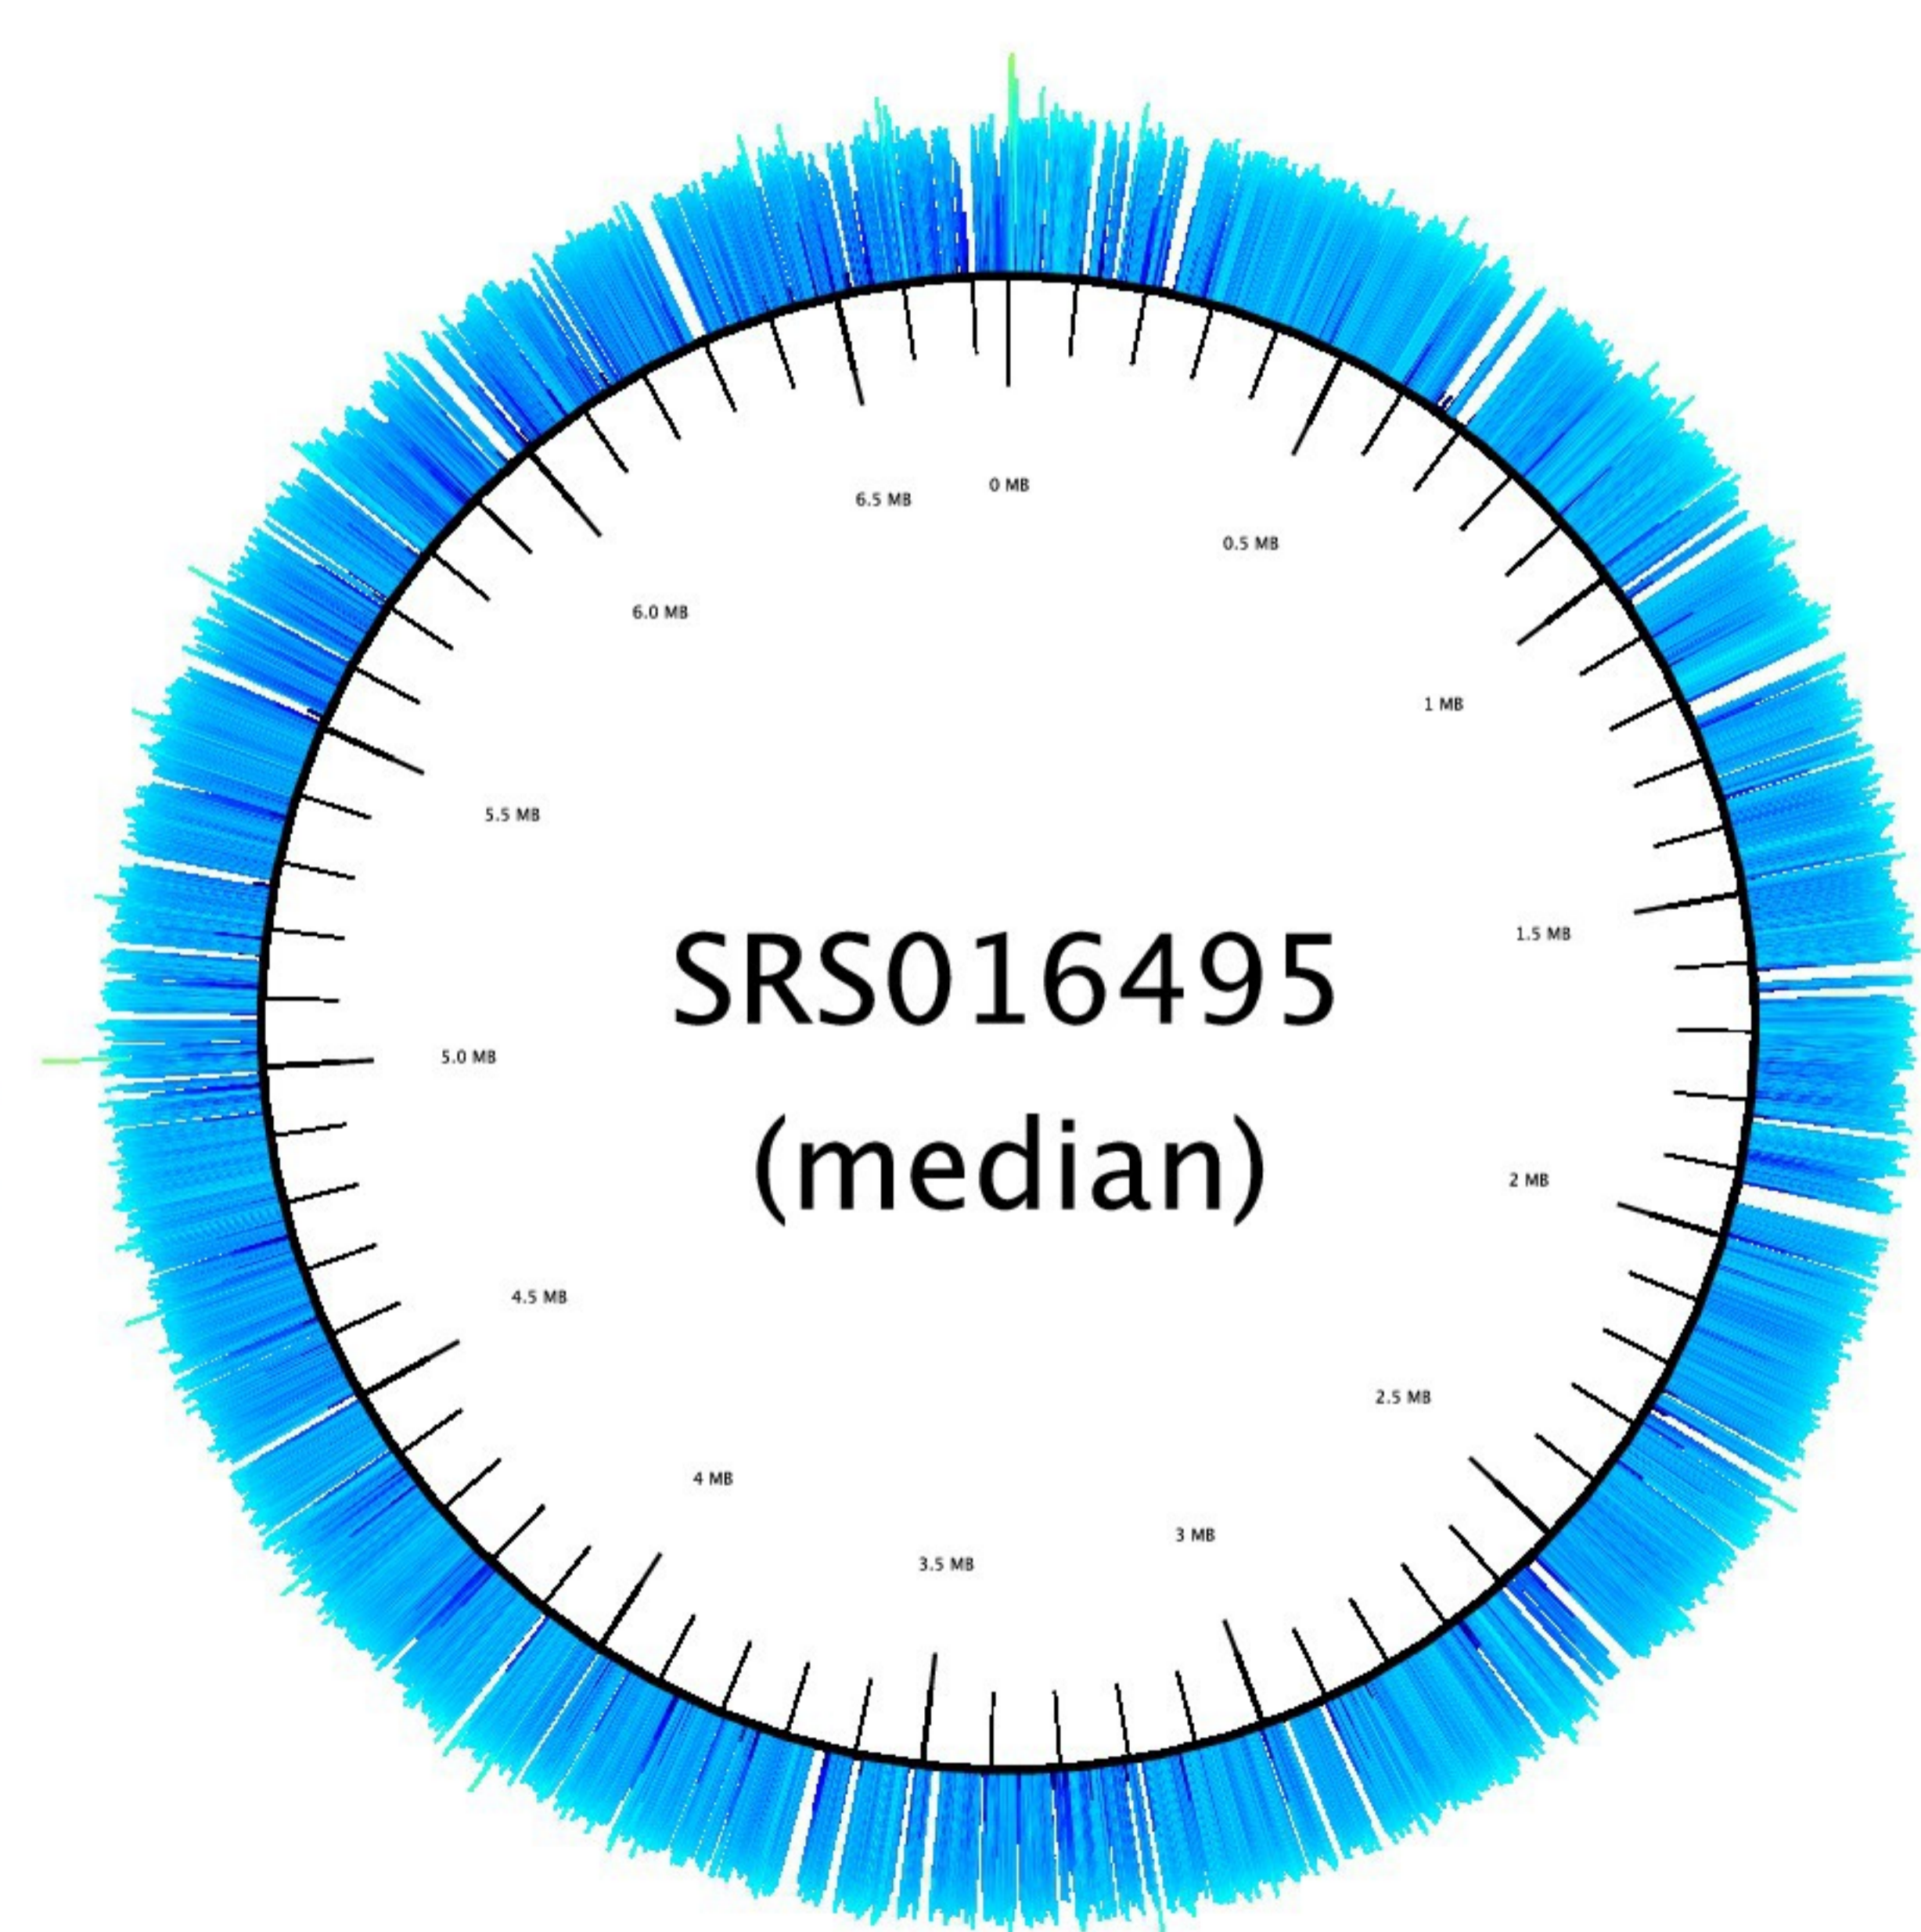

*Bacteroides dorei* DSM 17855

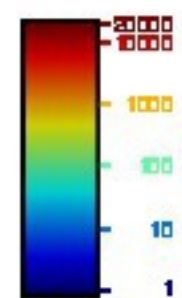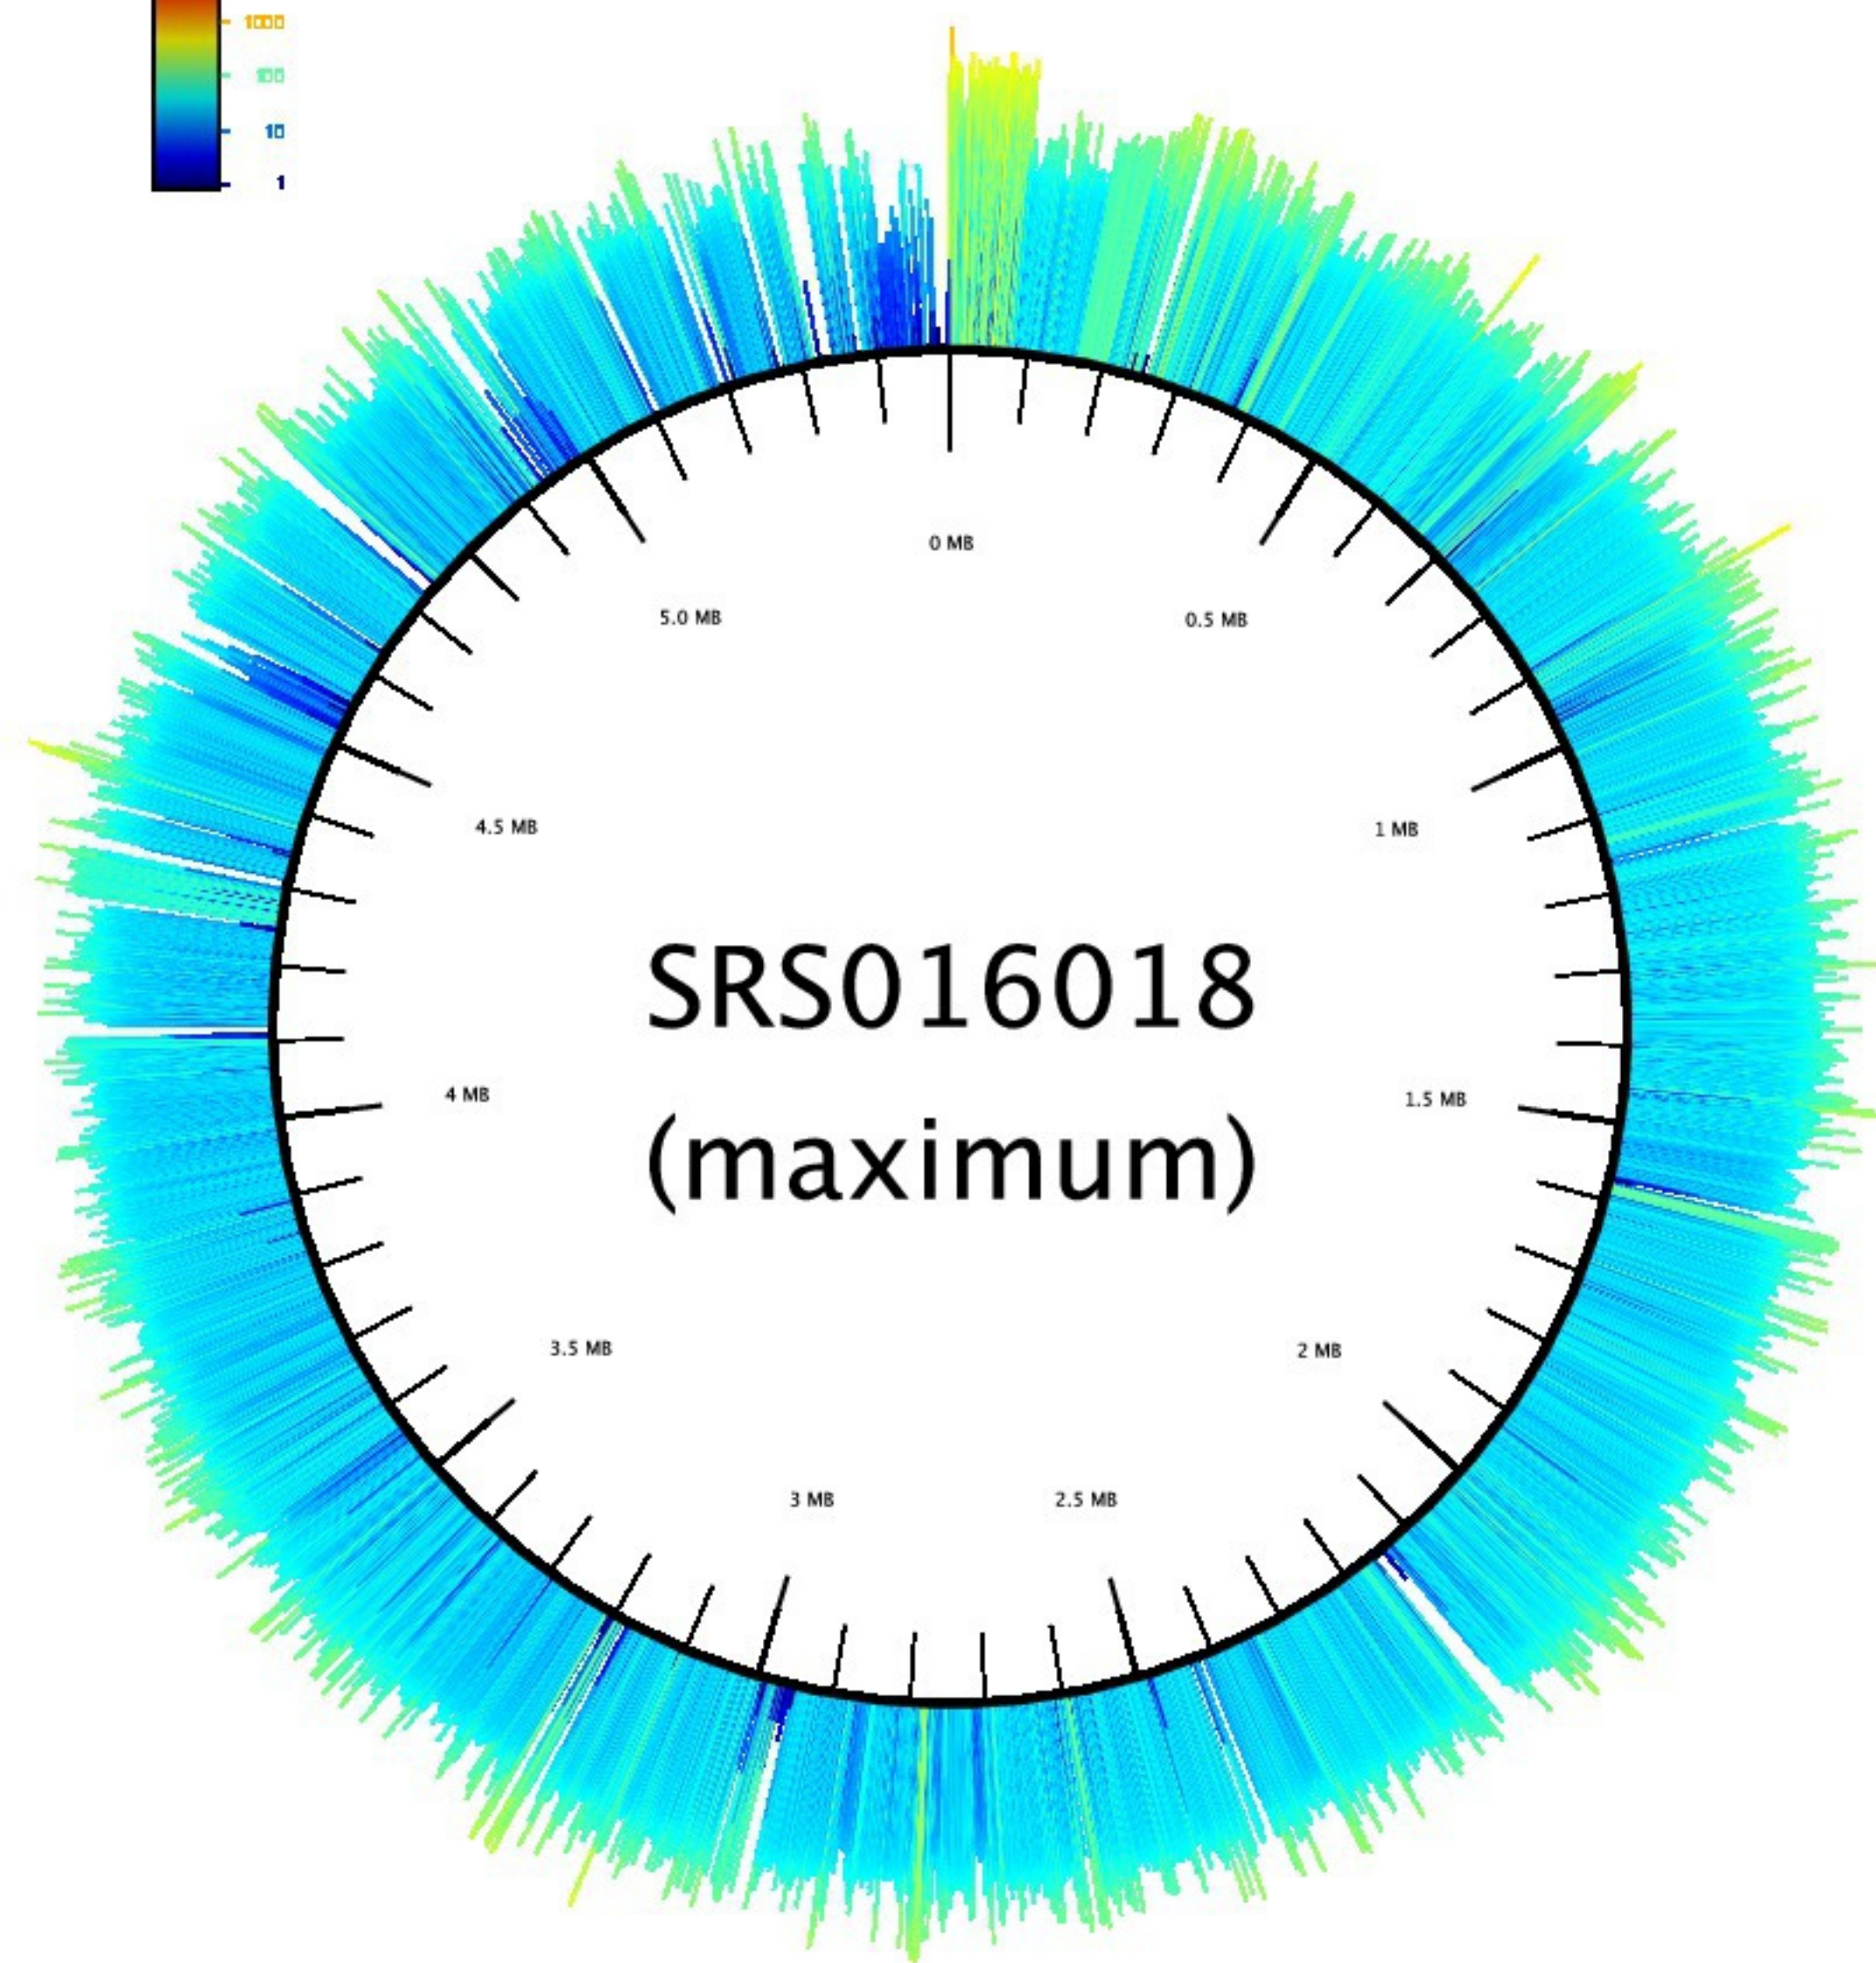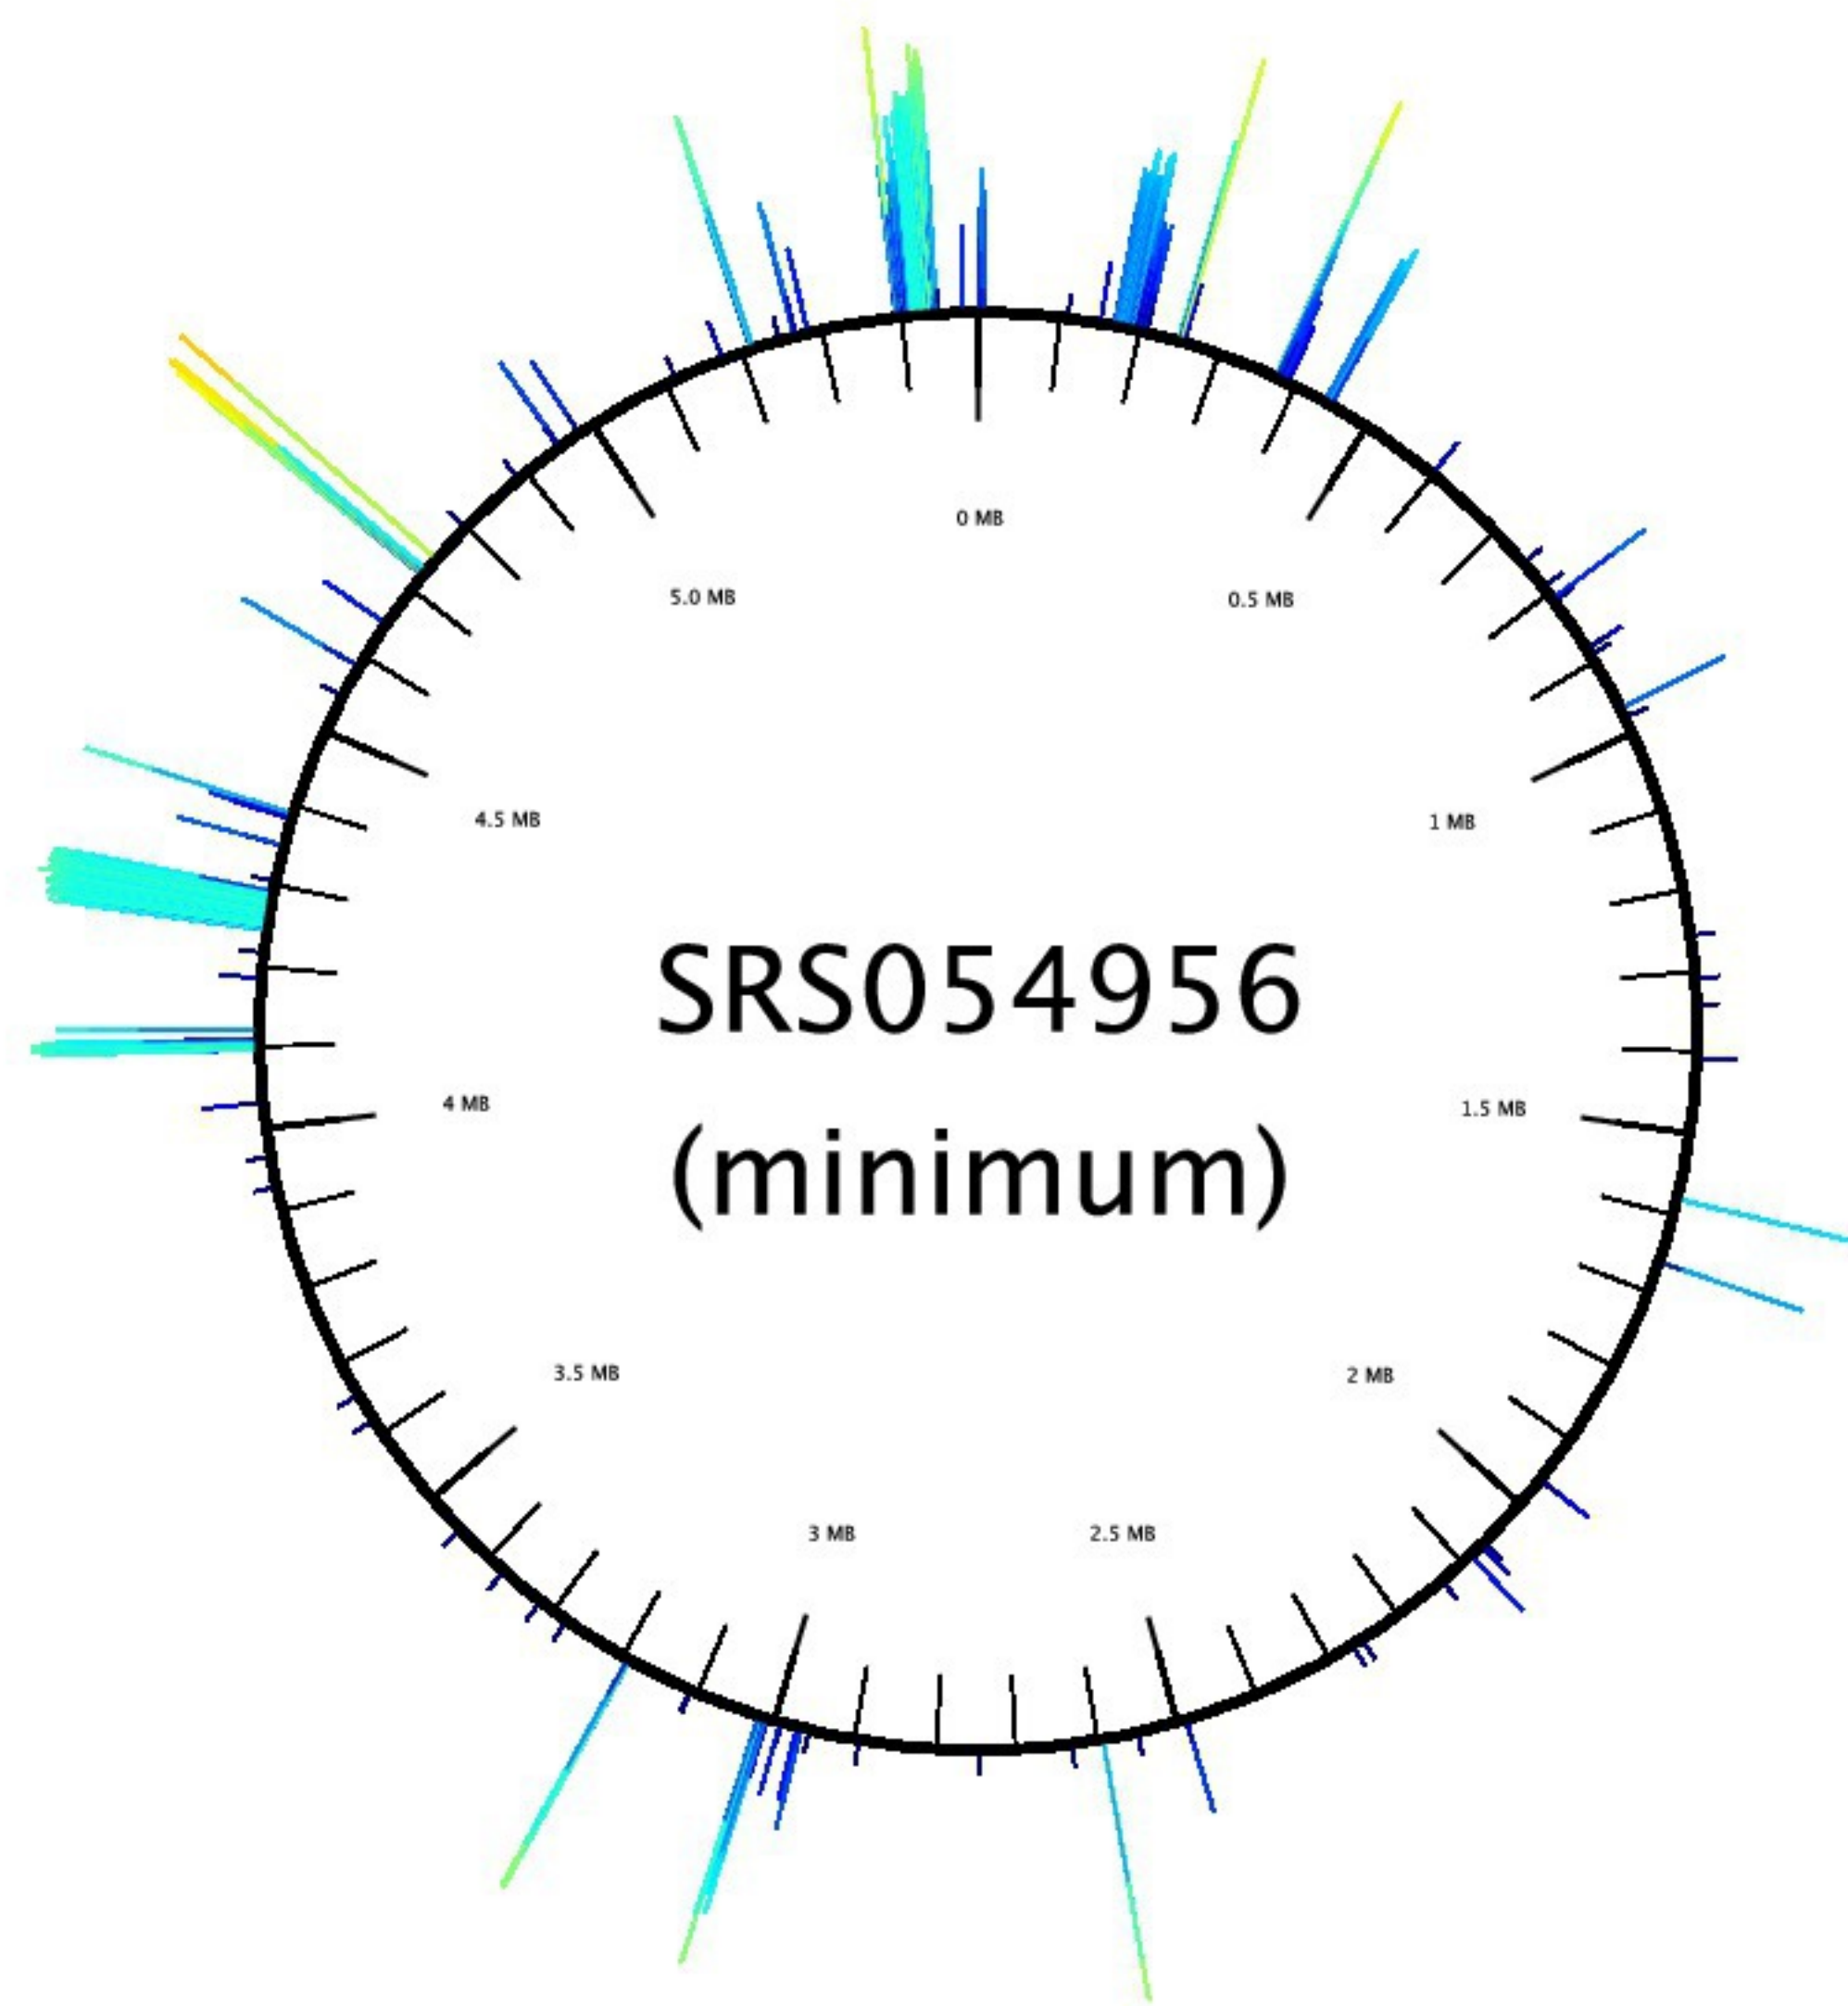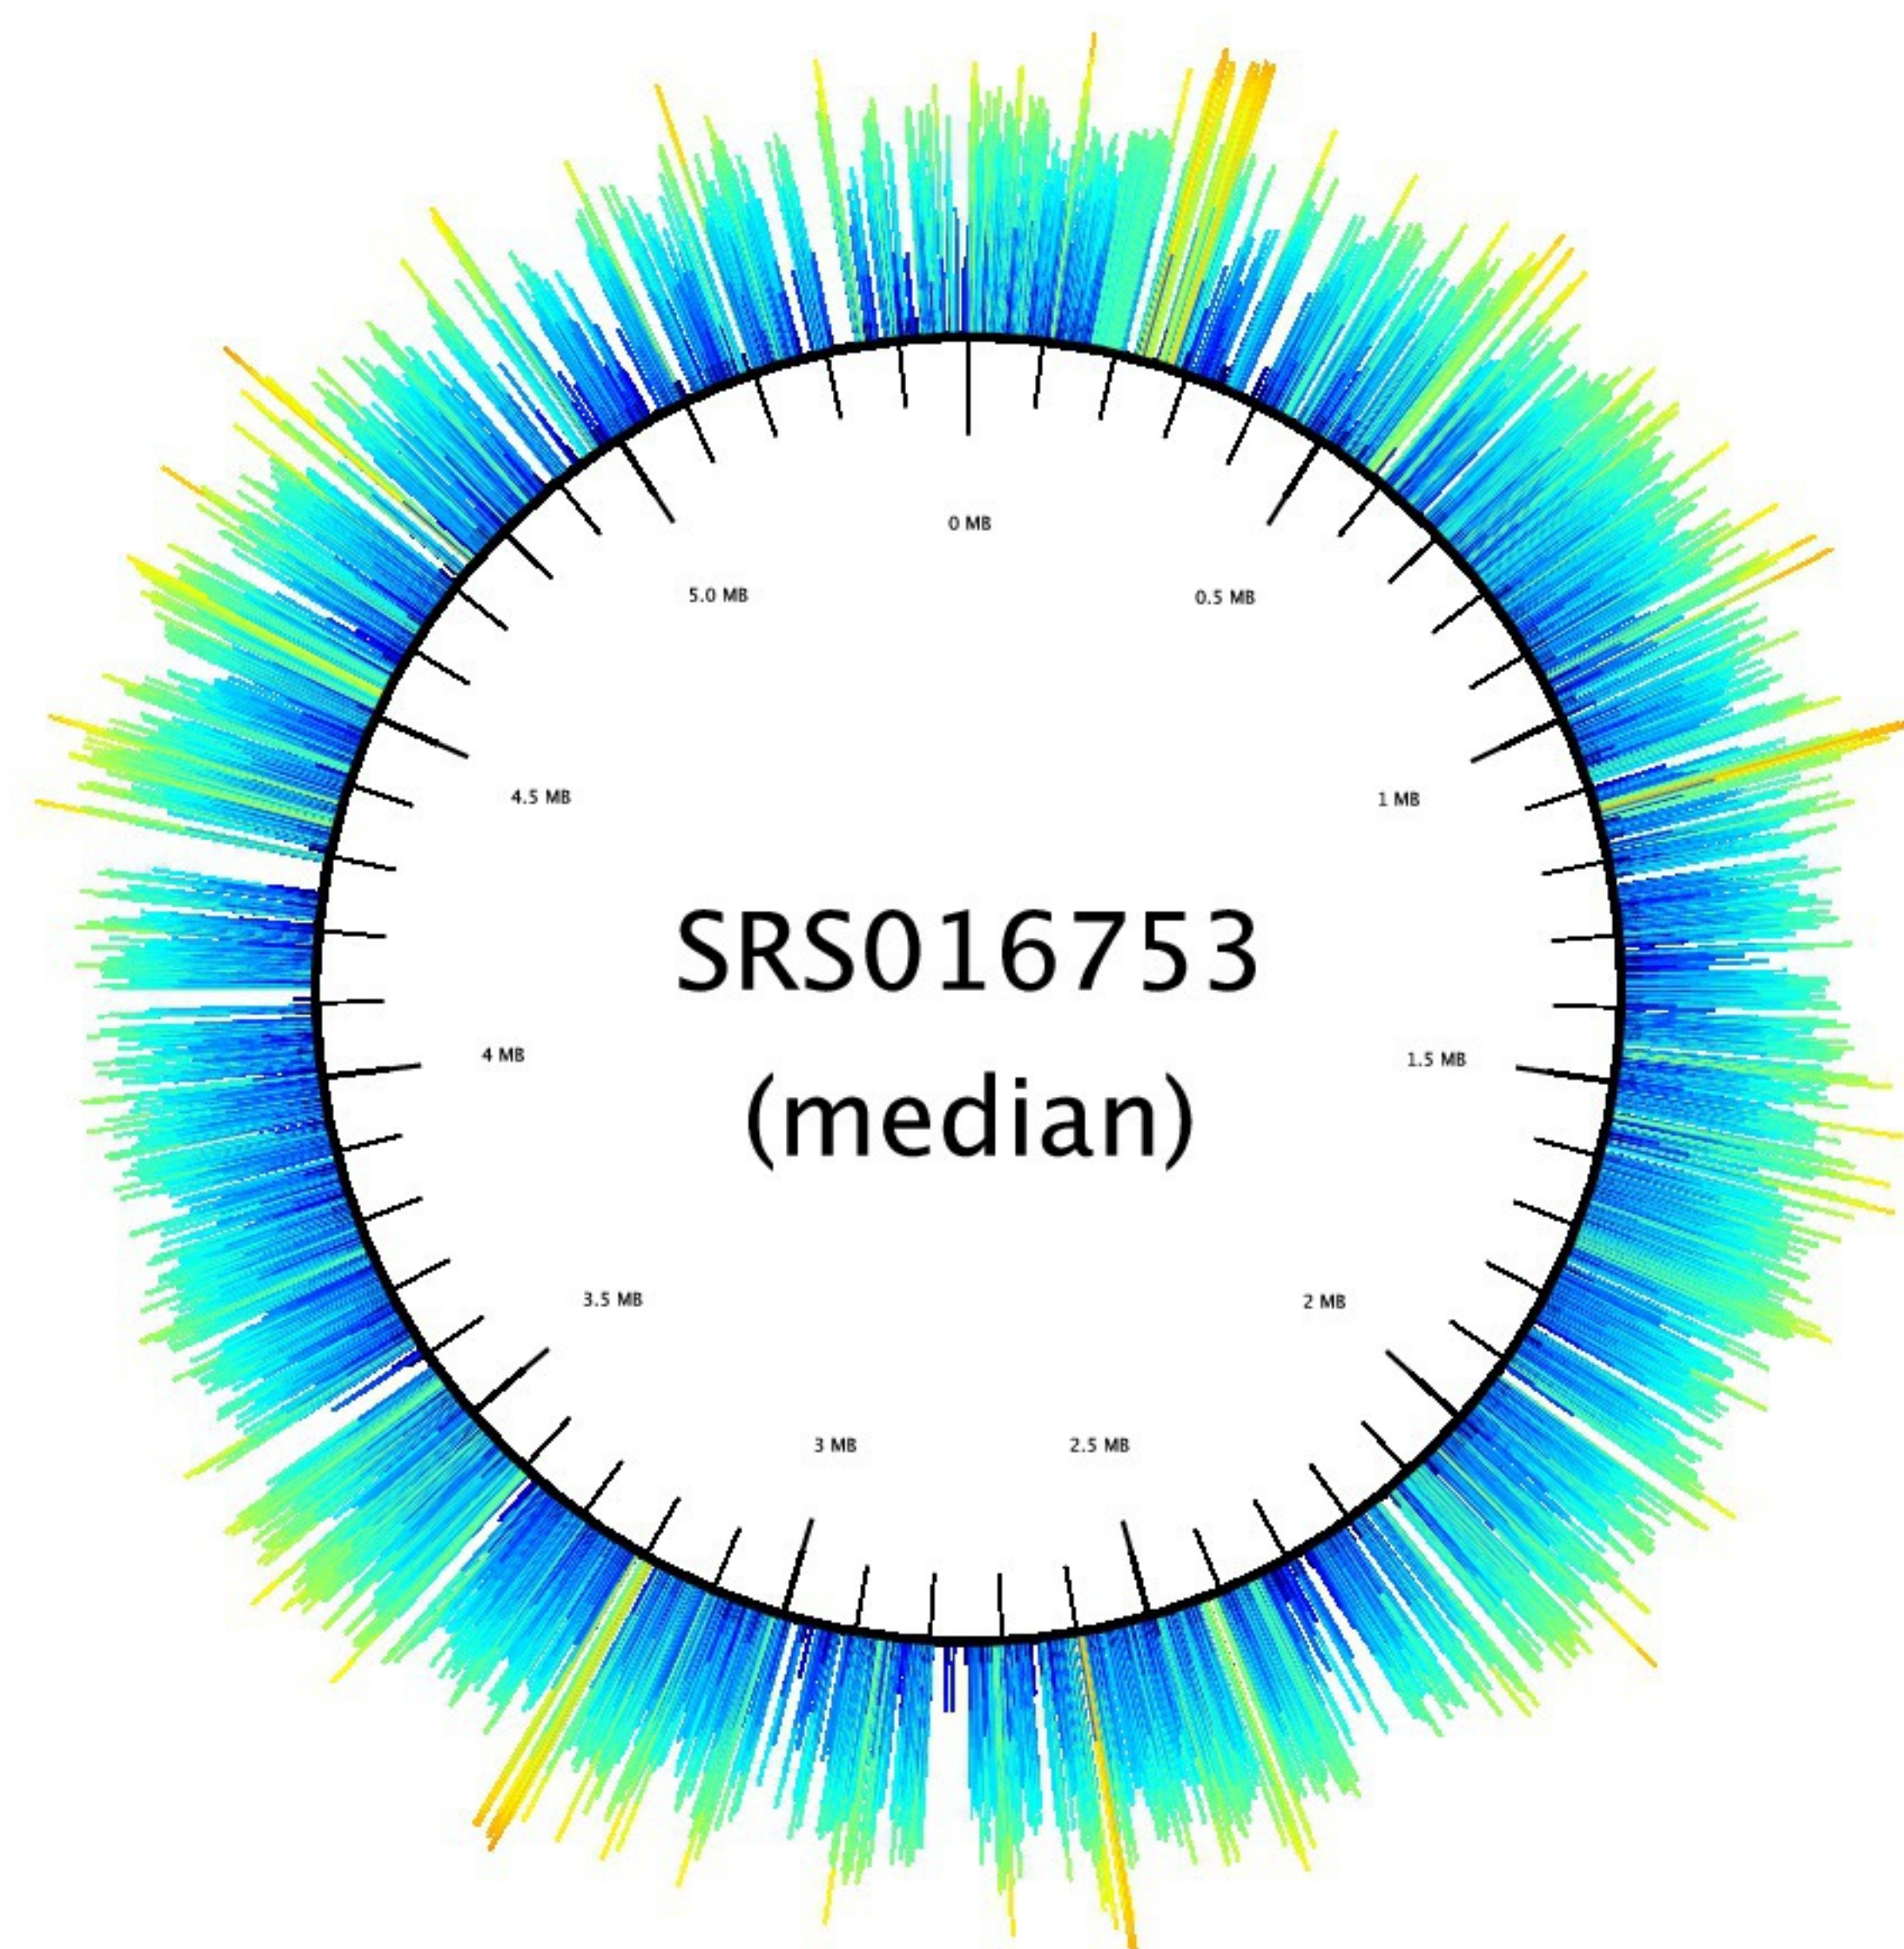

*Bacteroides eggerthii* DSM 20697

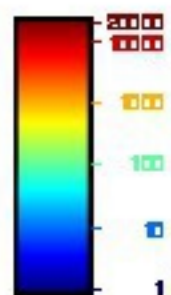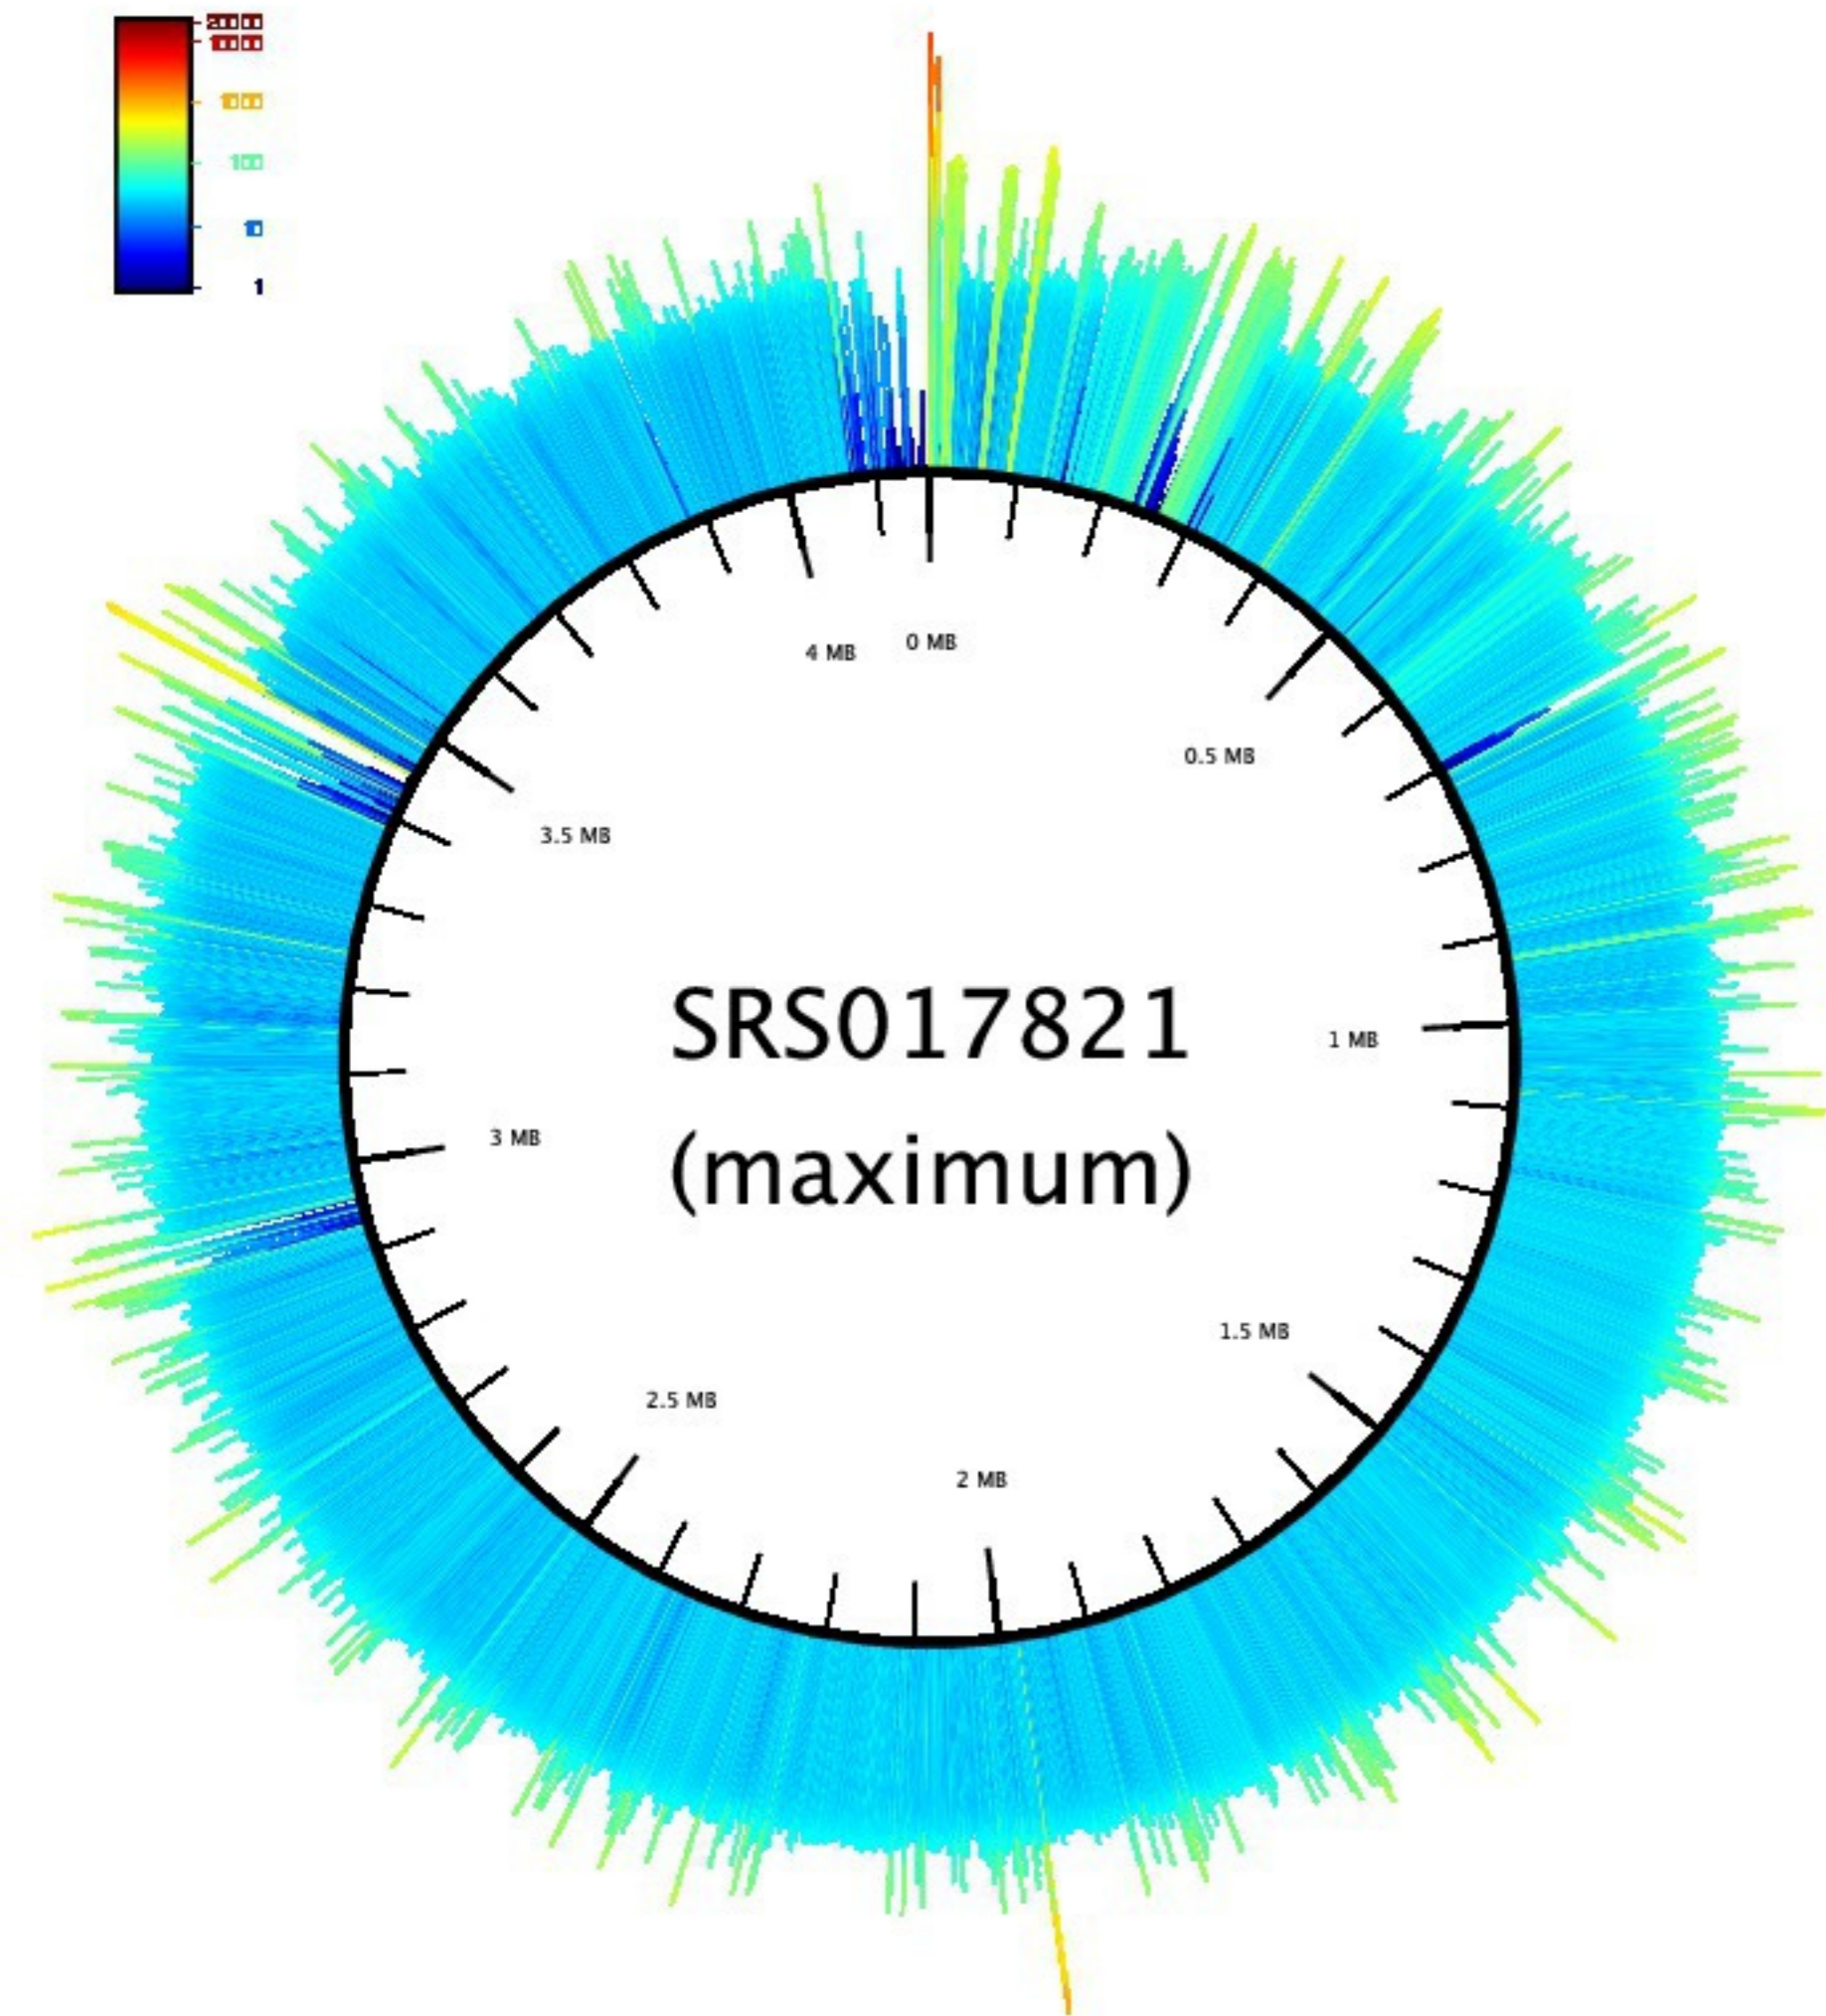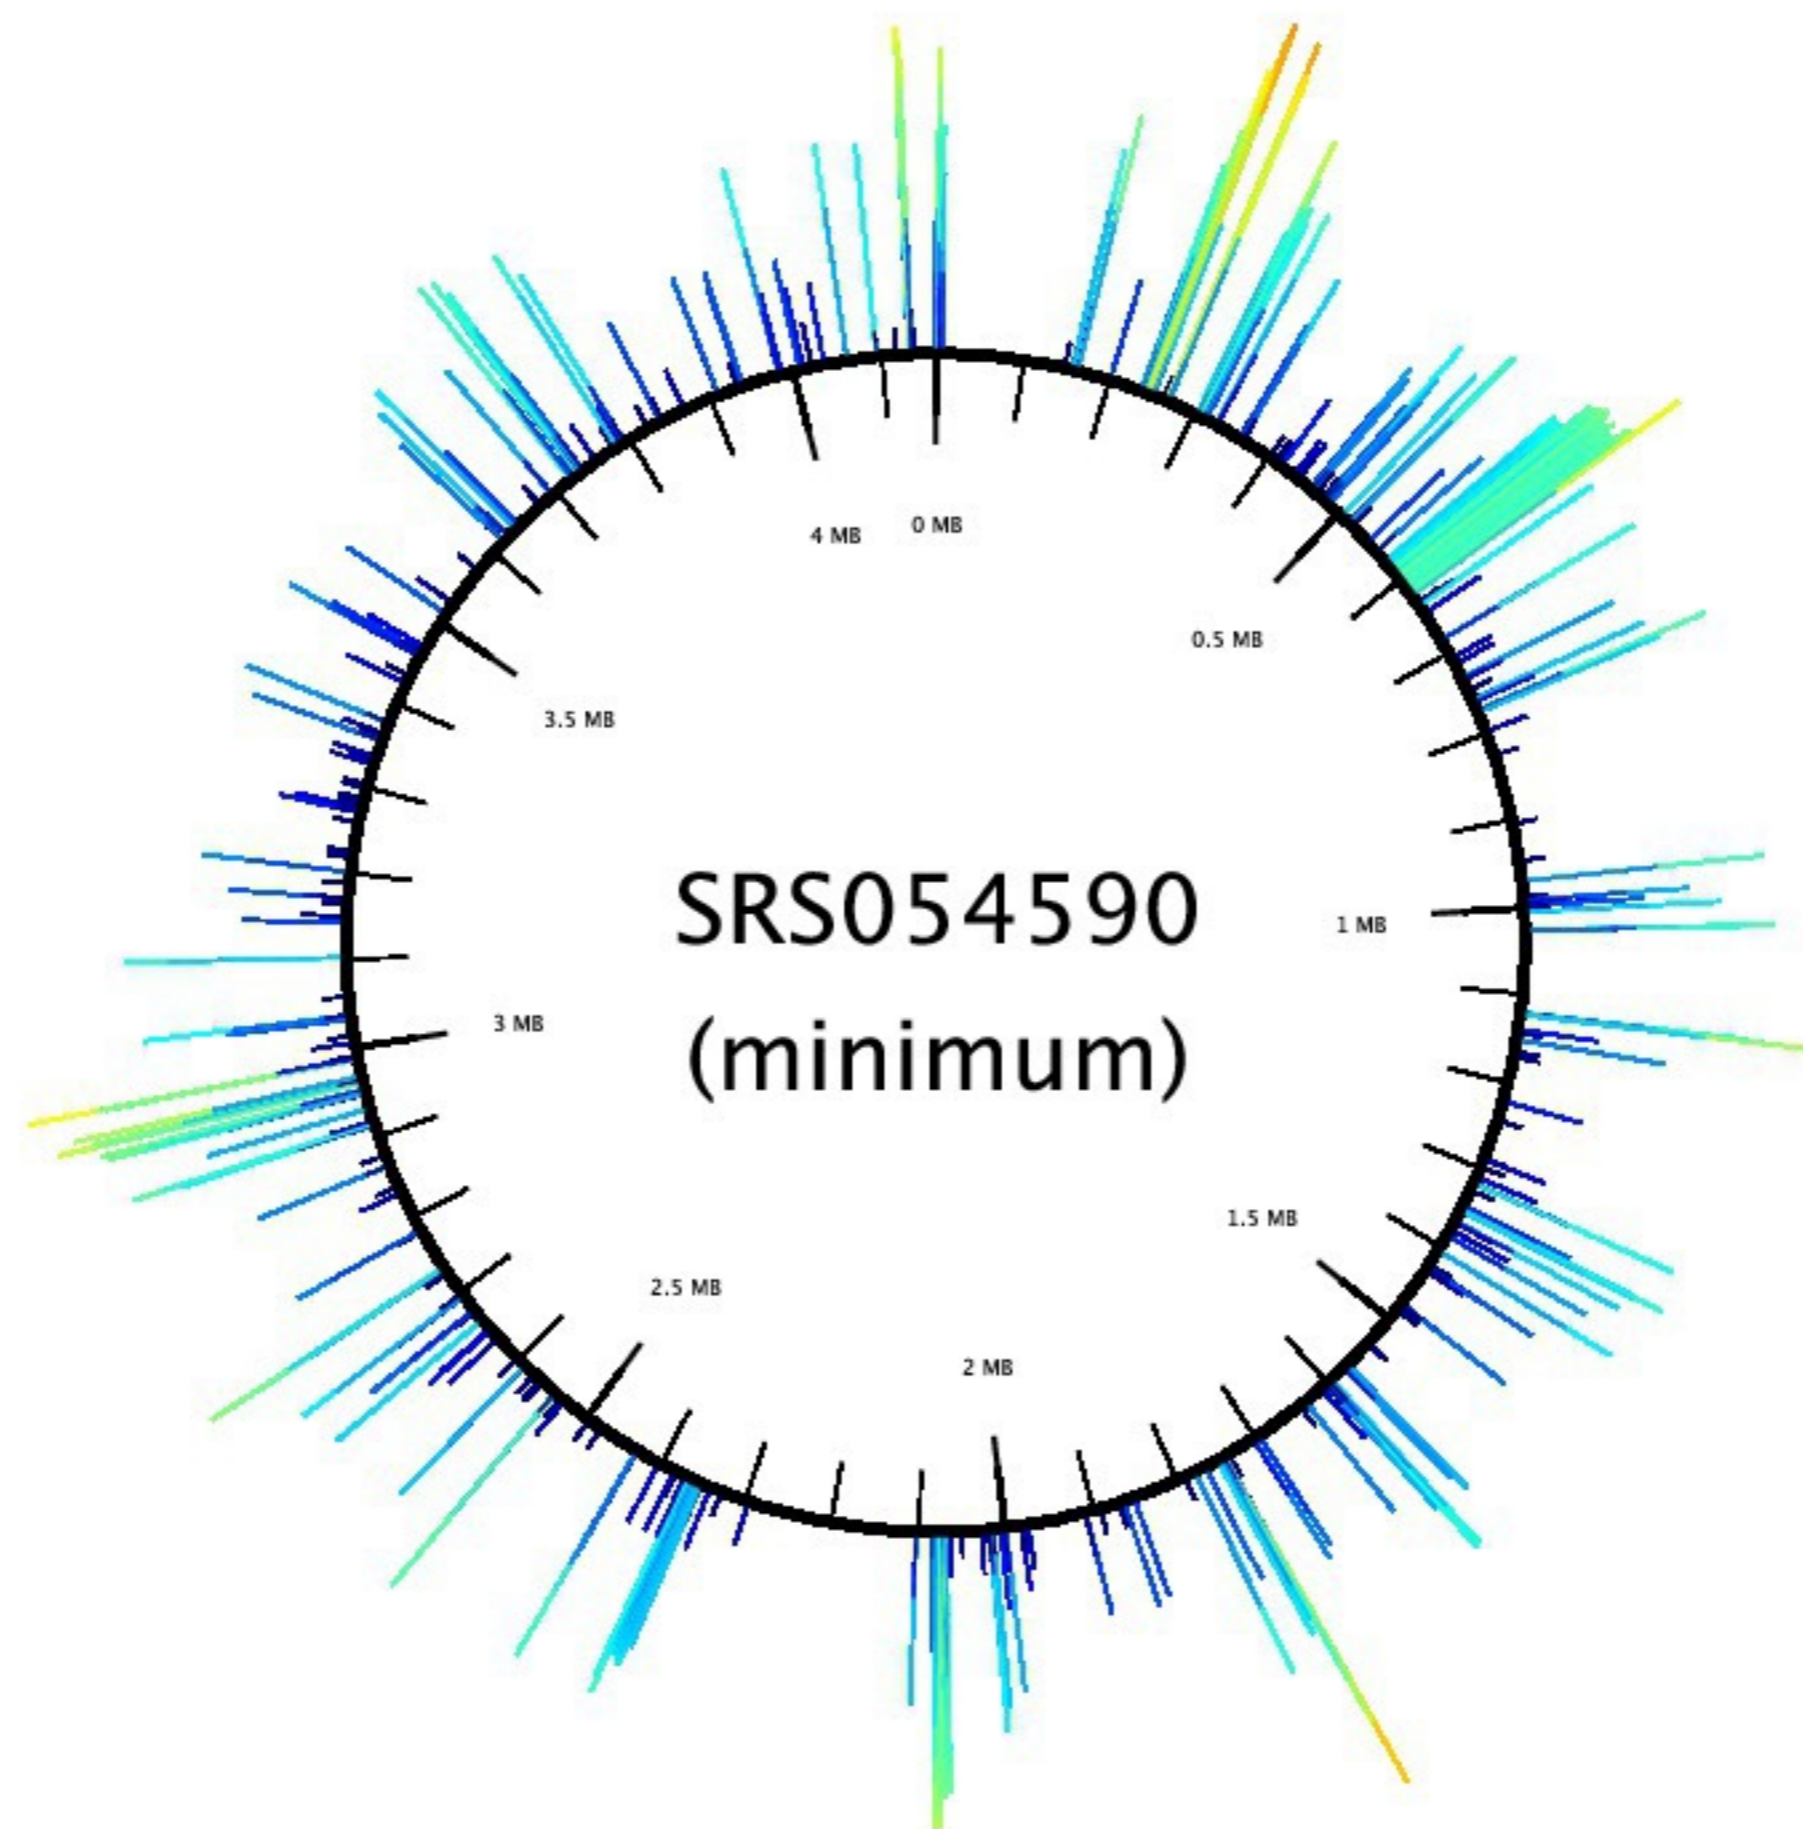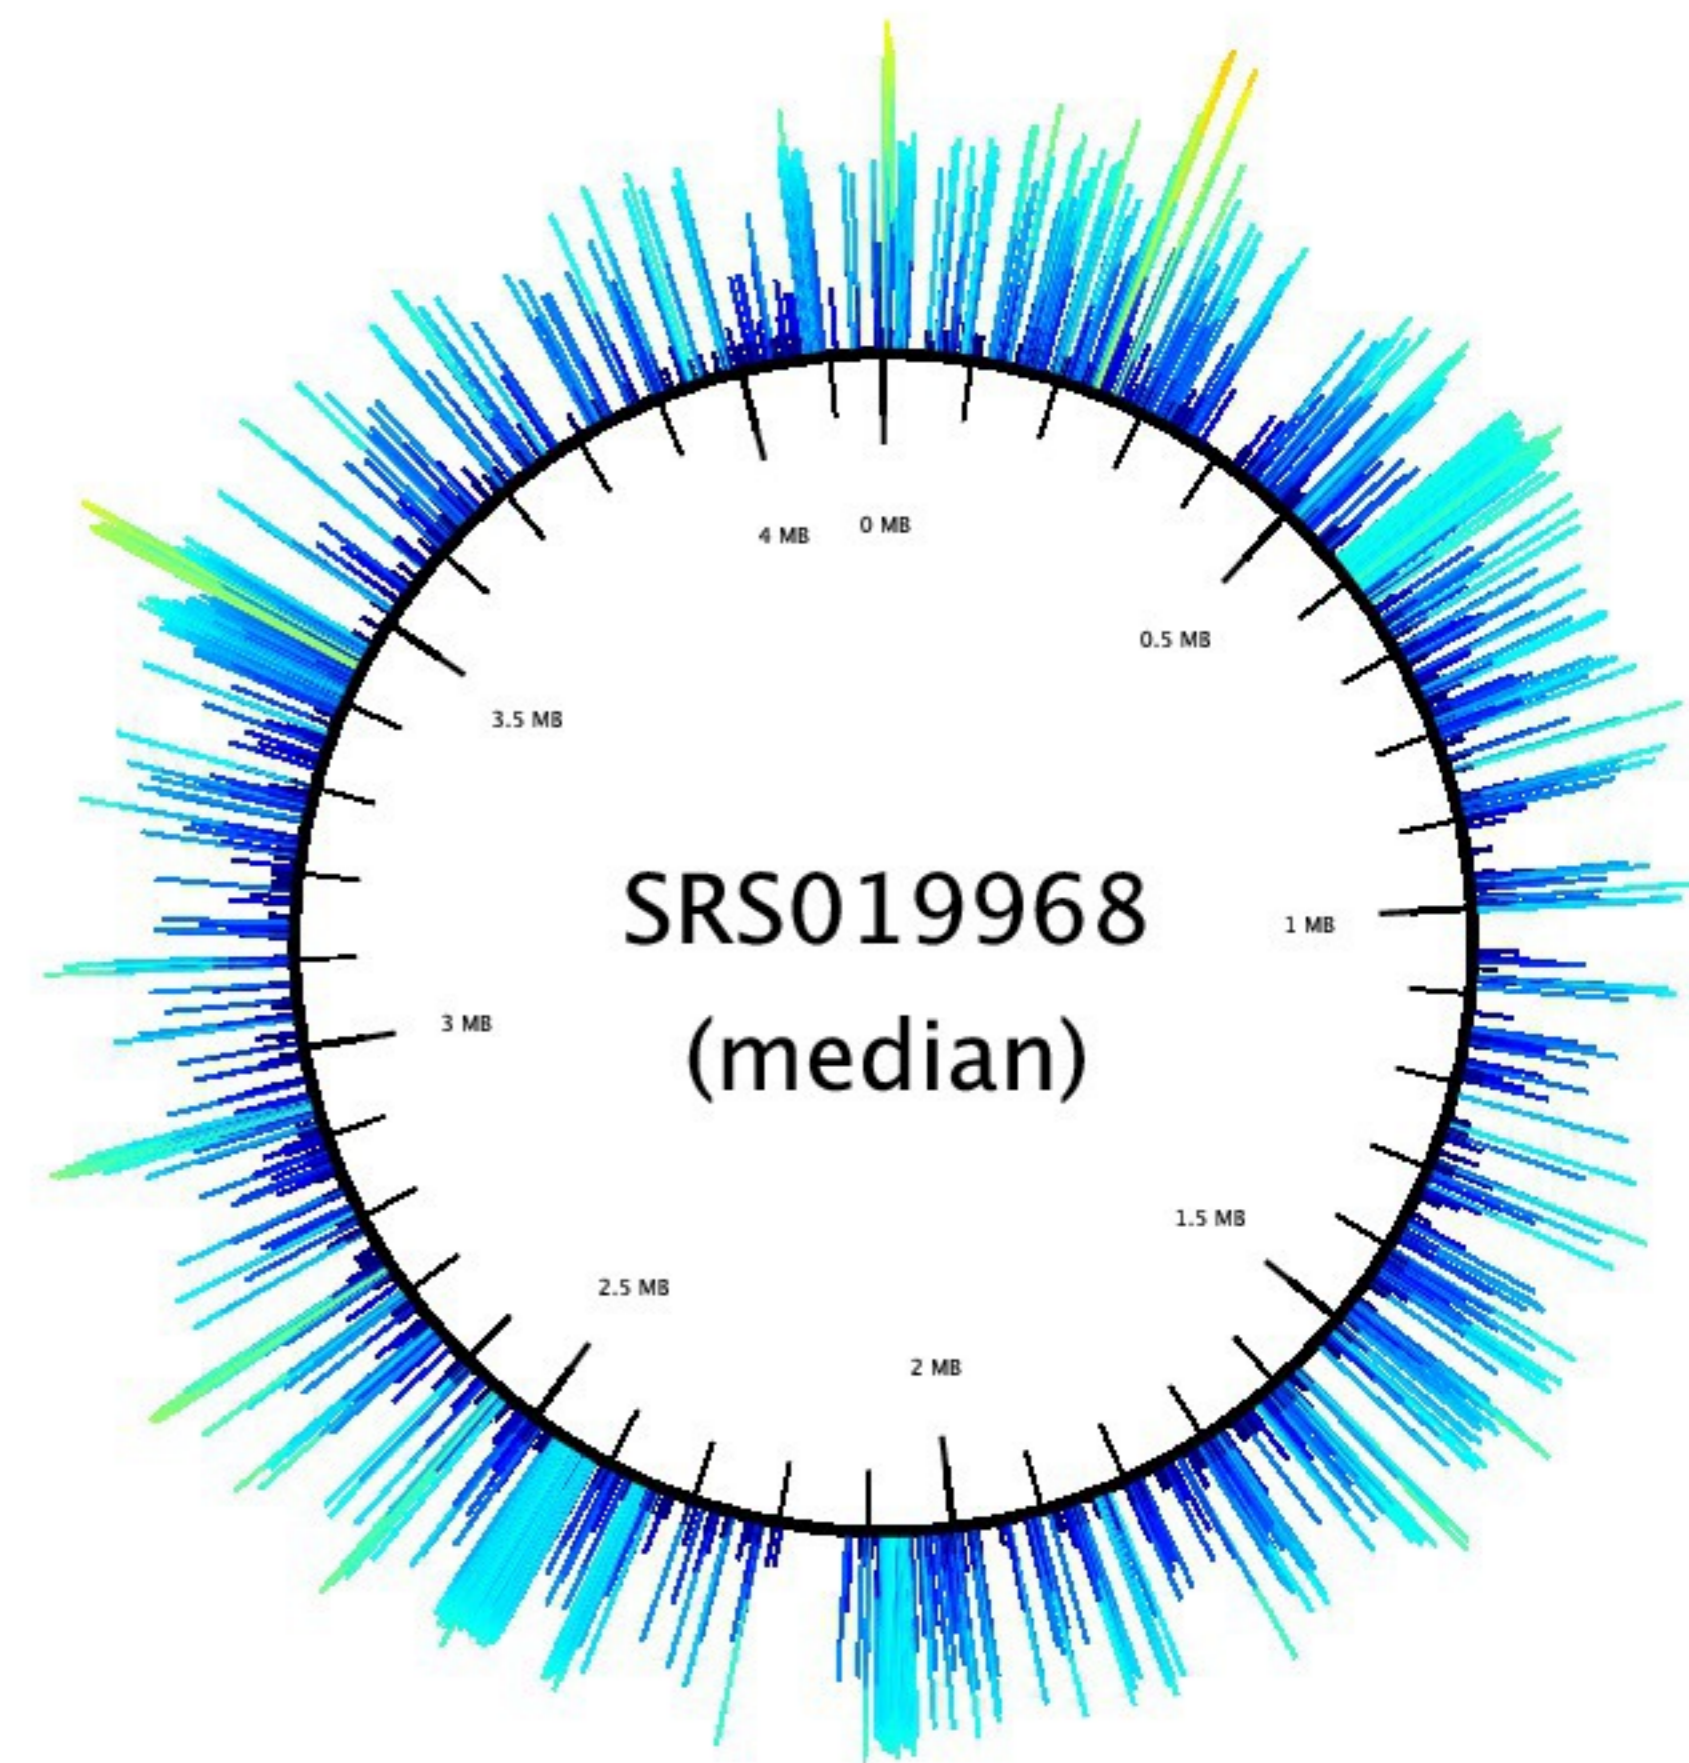



*Bacteroides finegoldii* DSM 17565

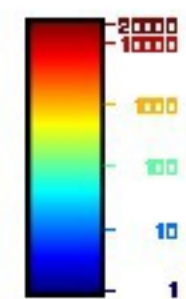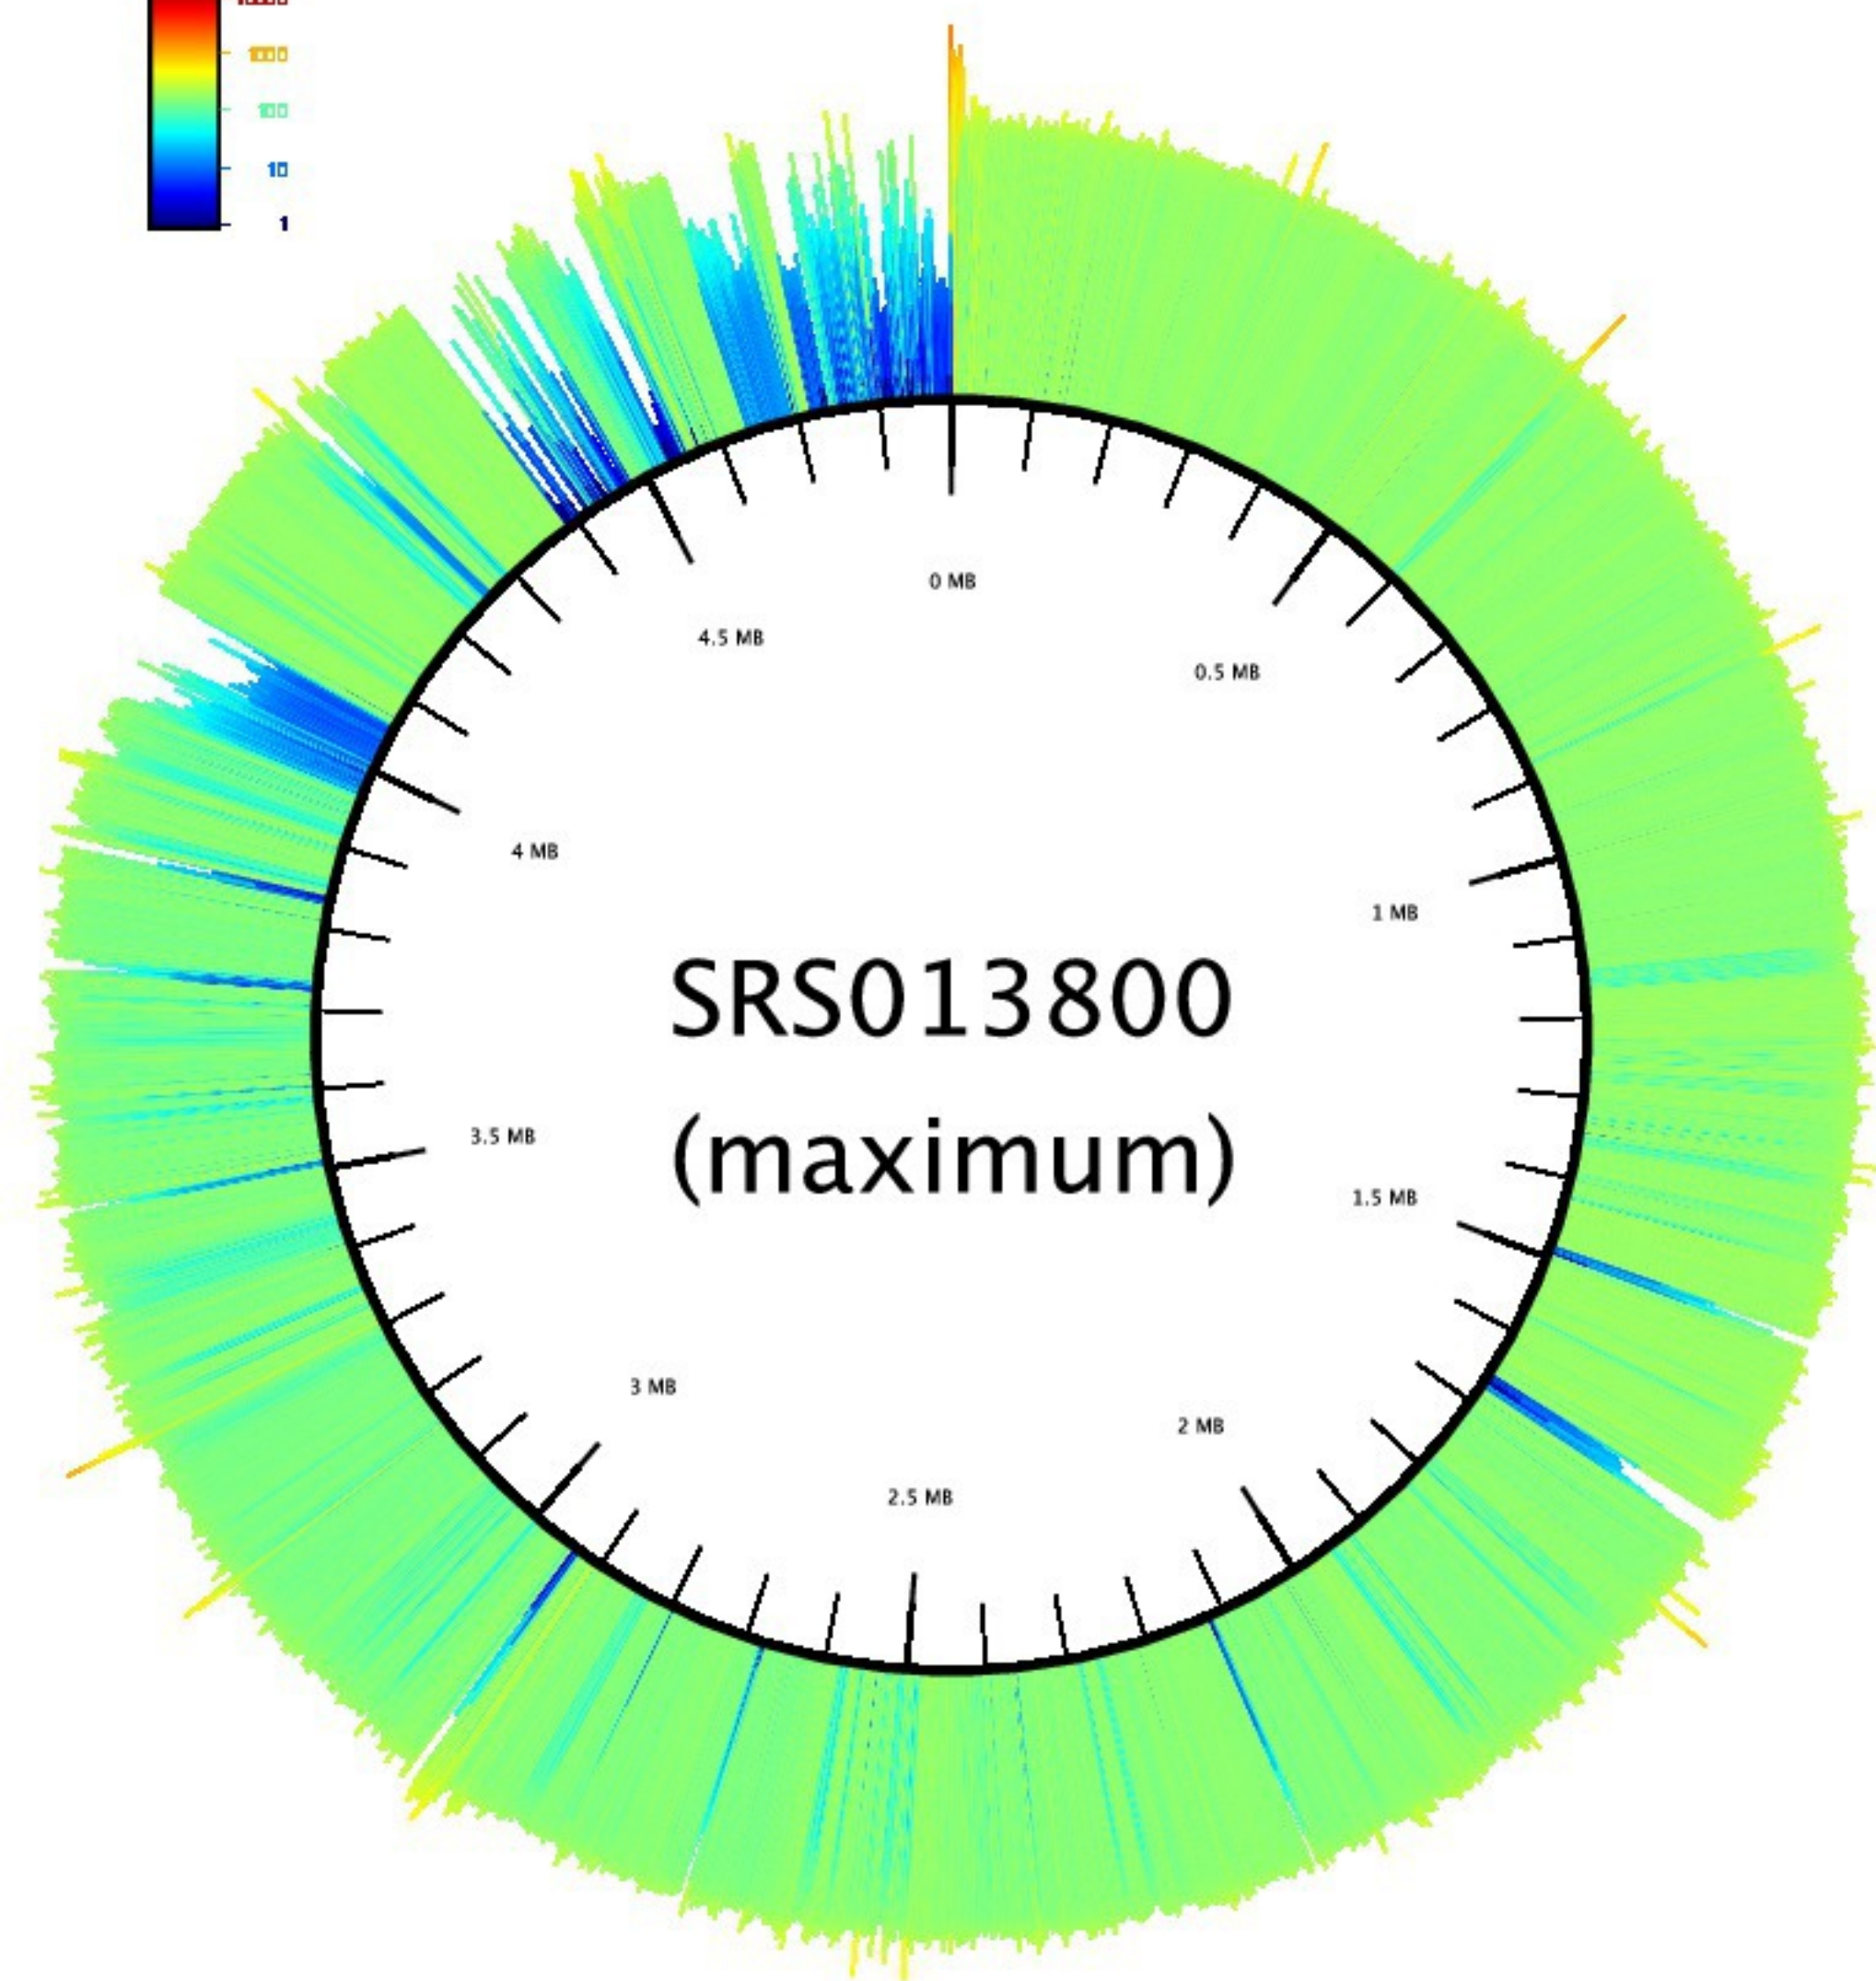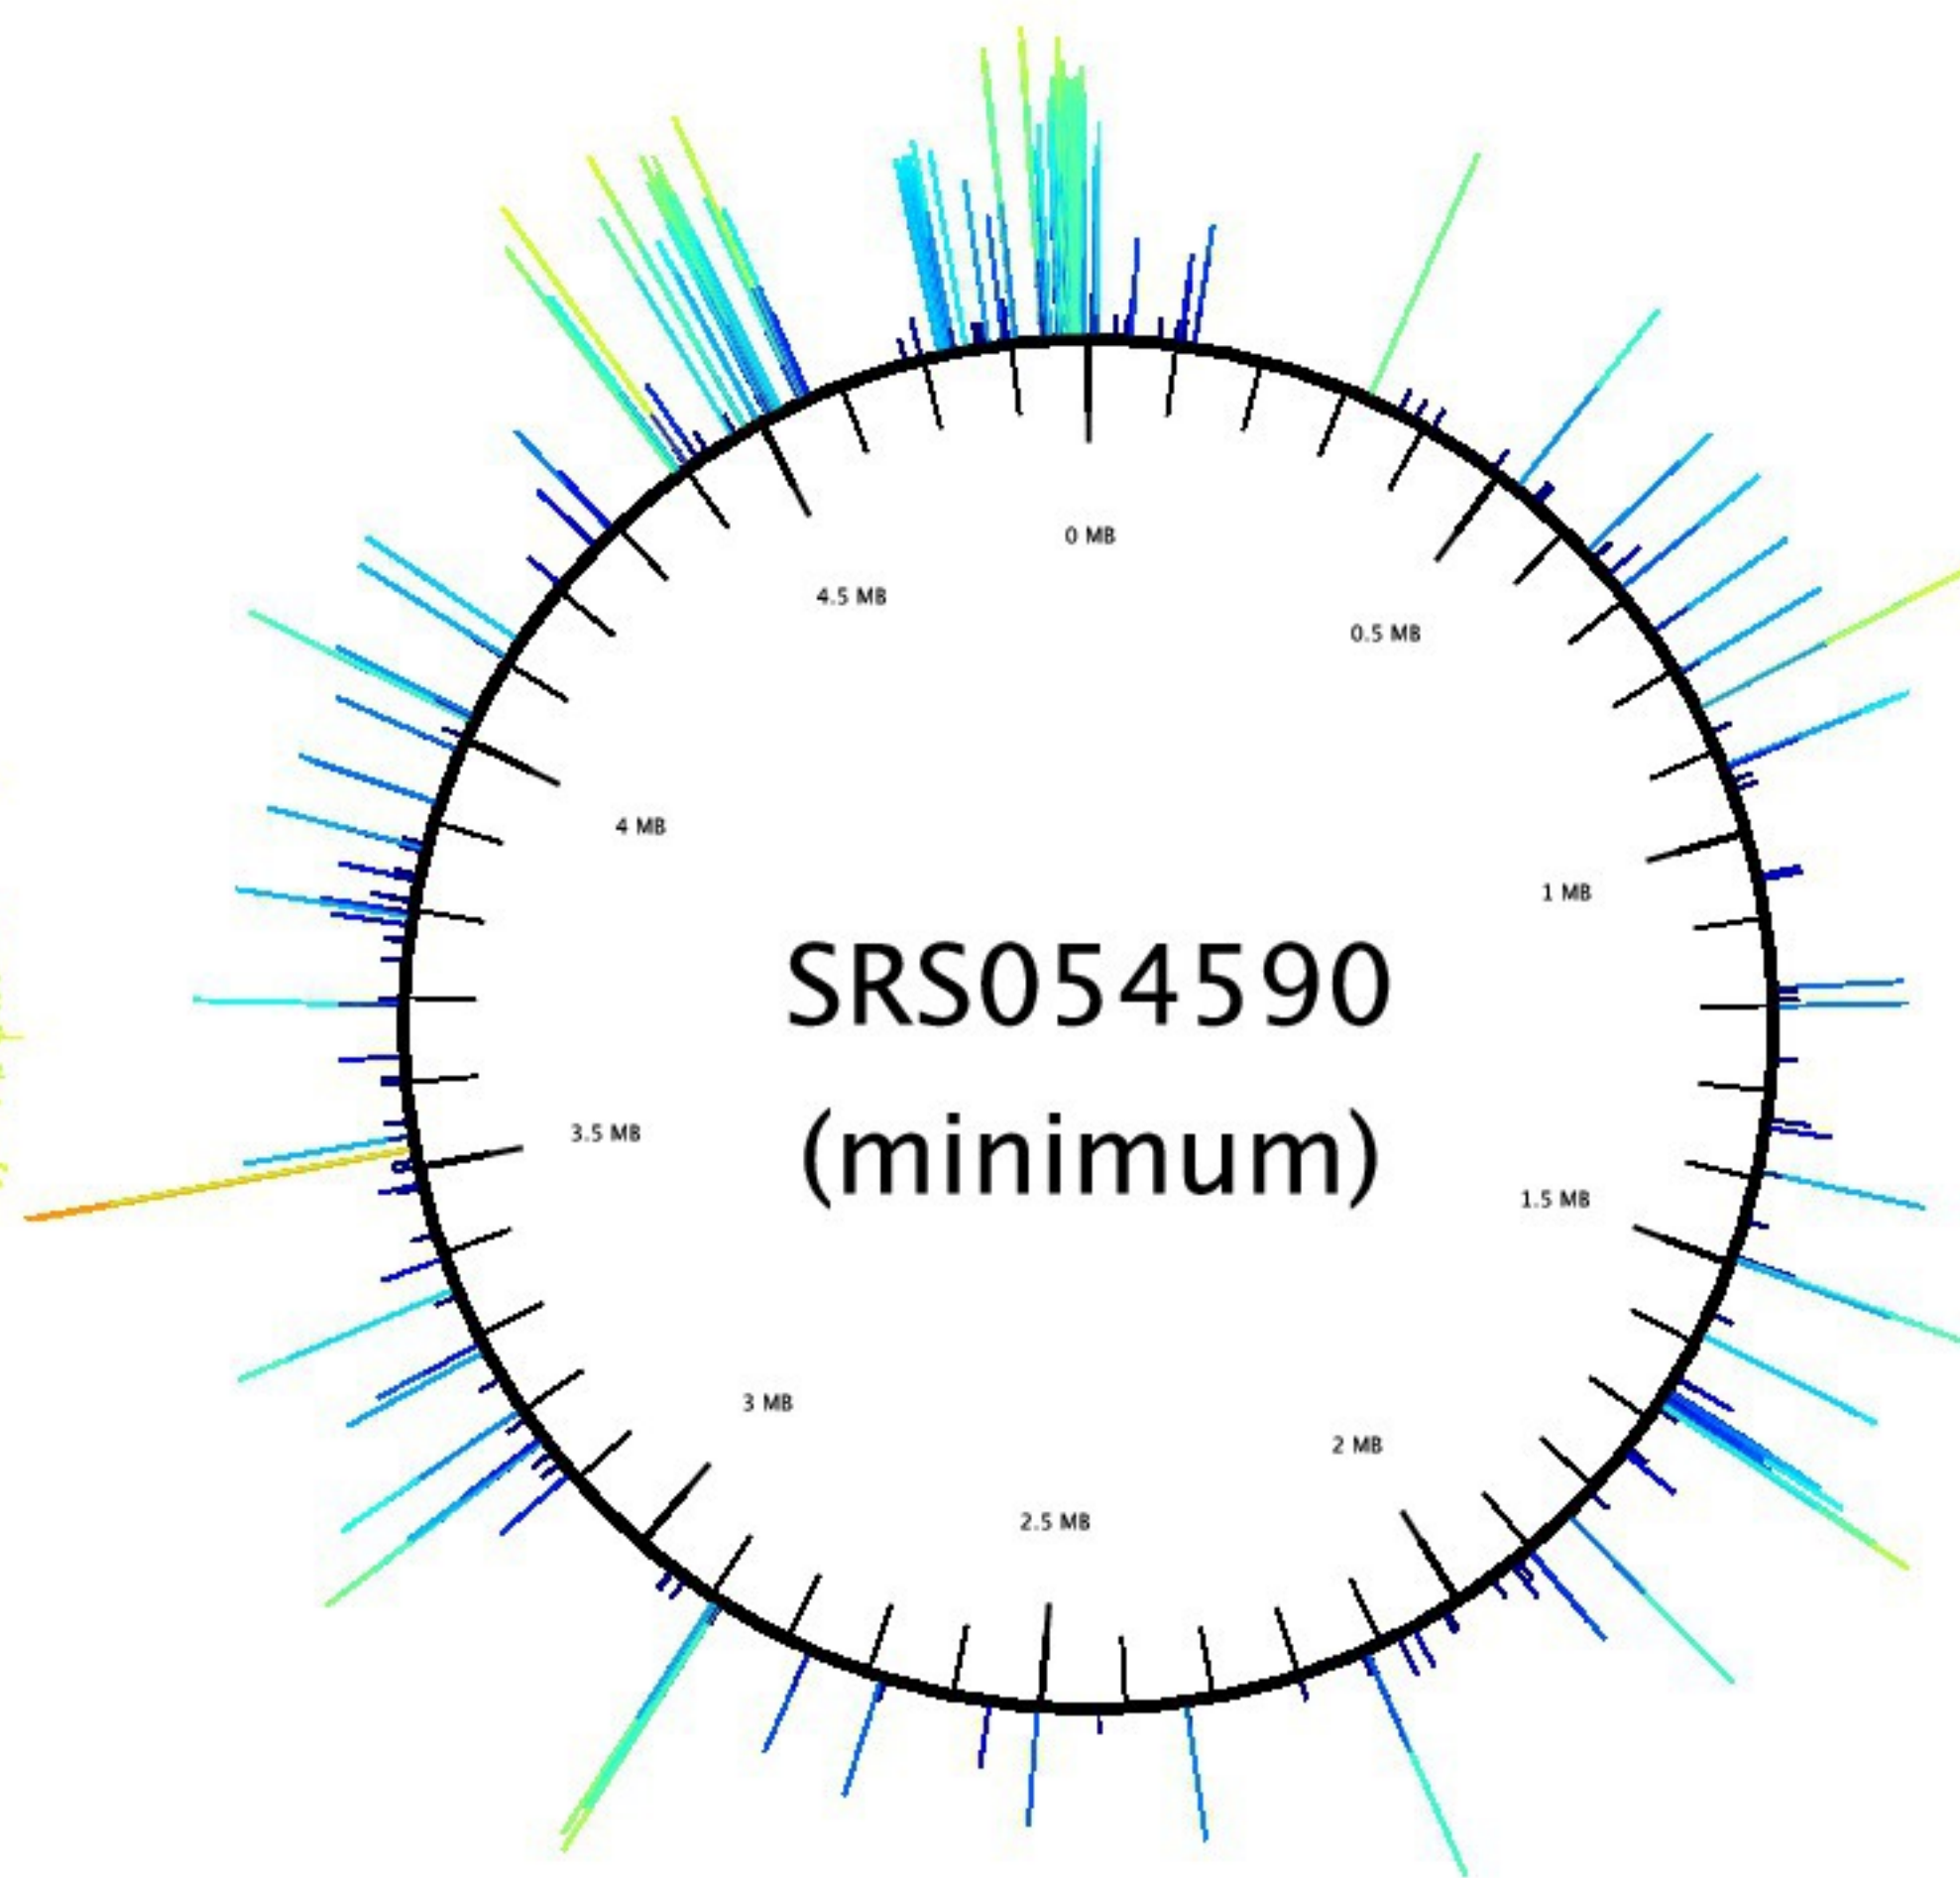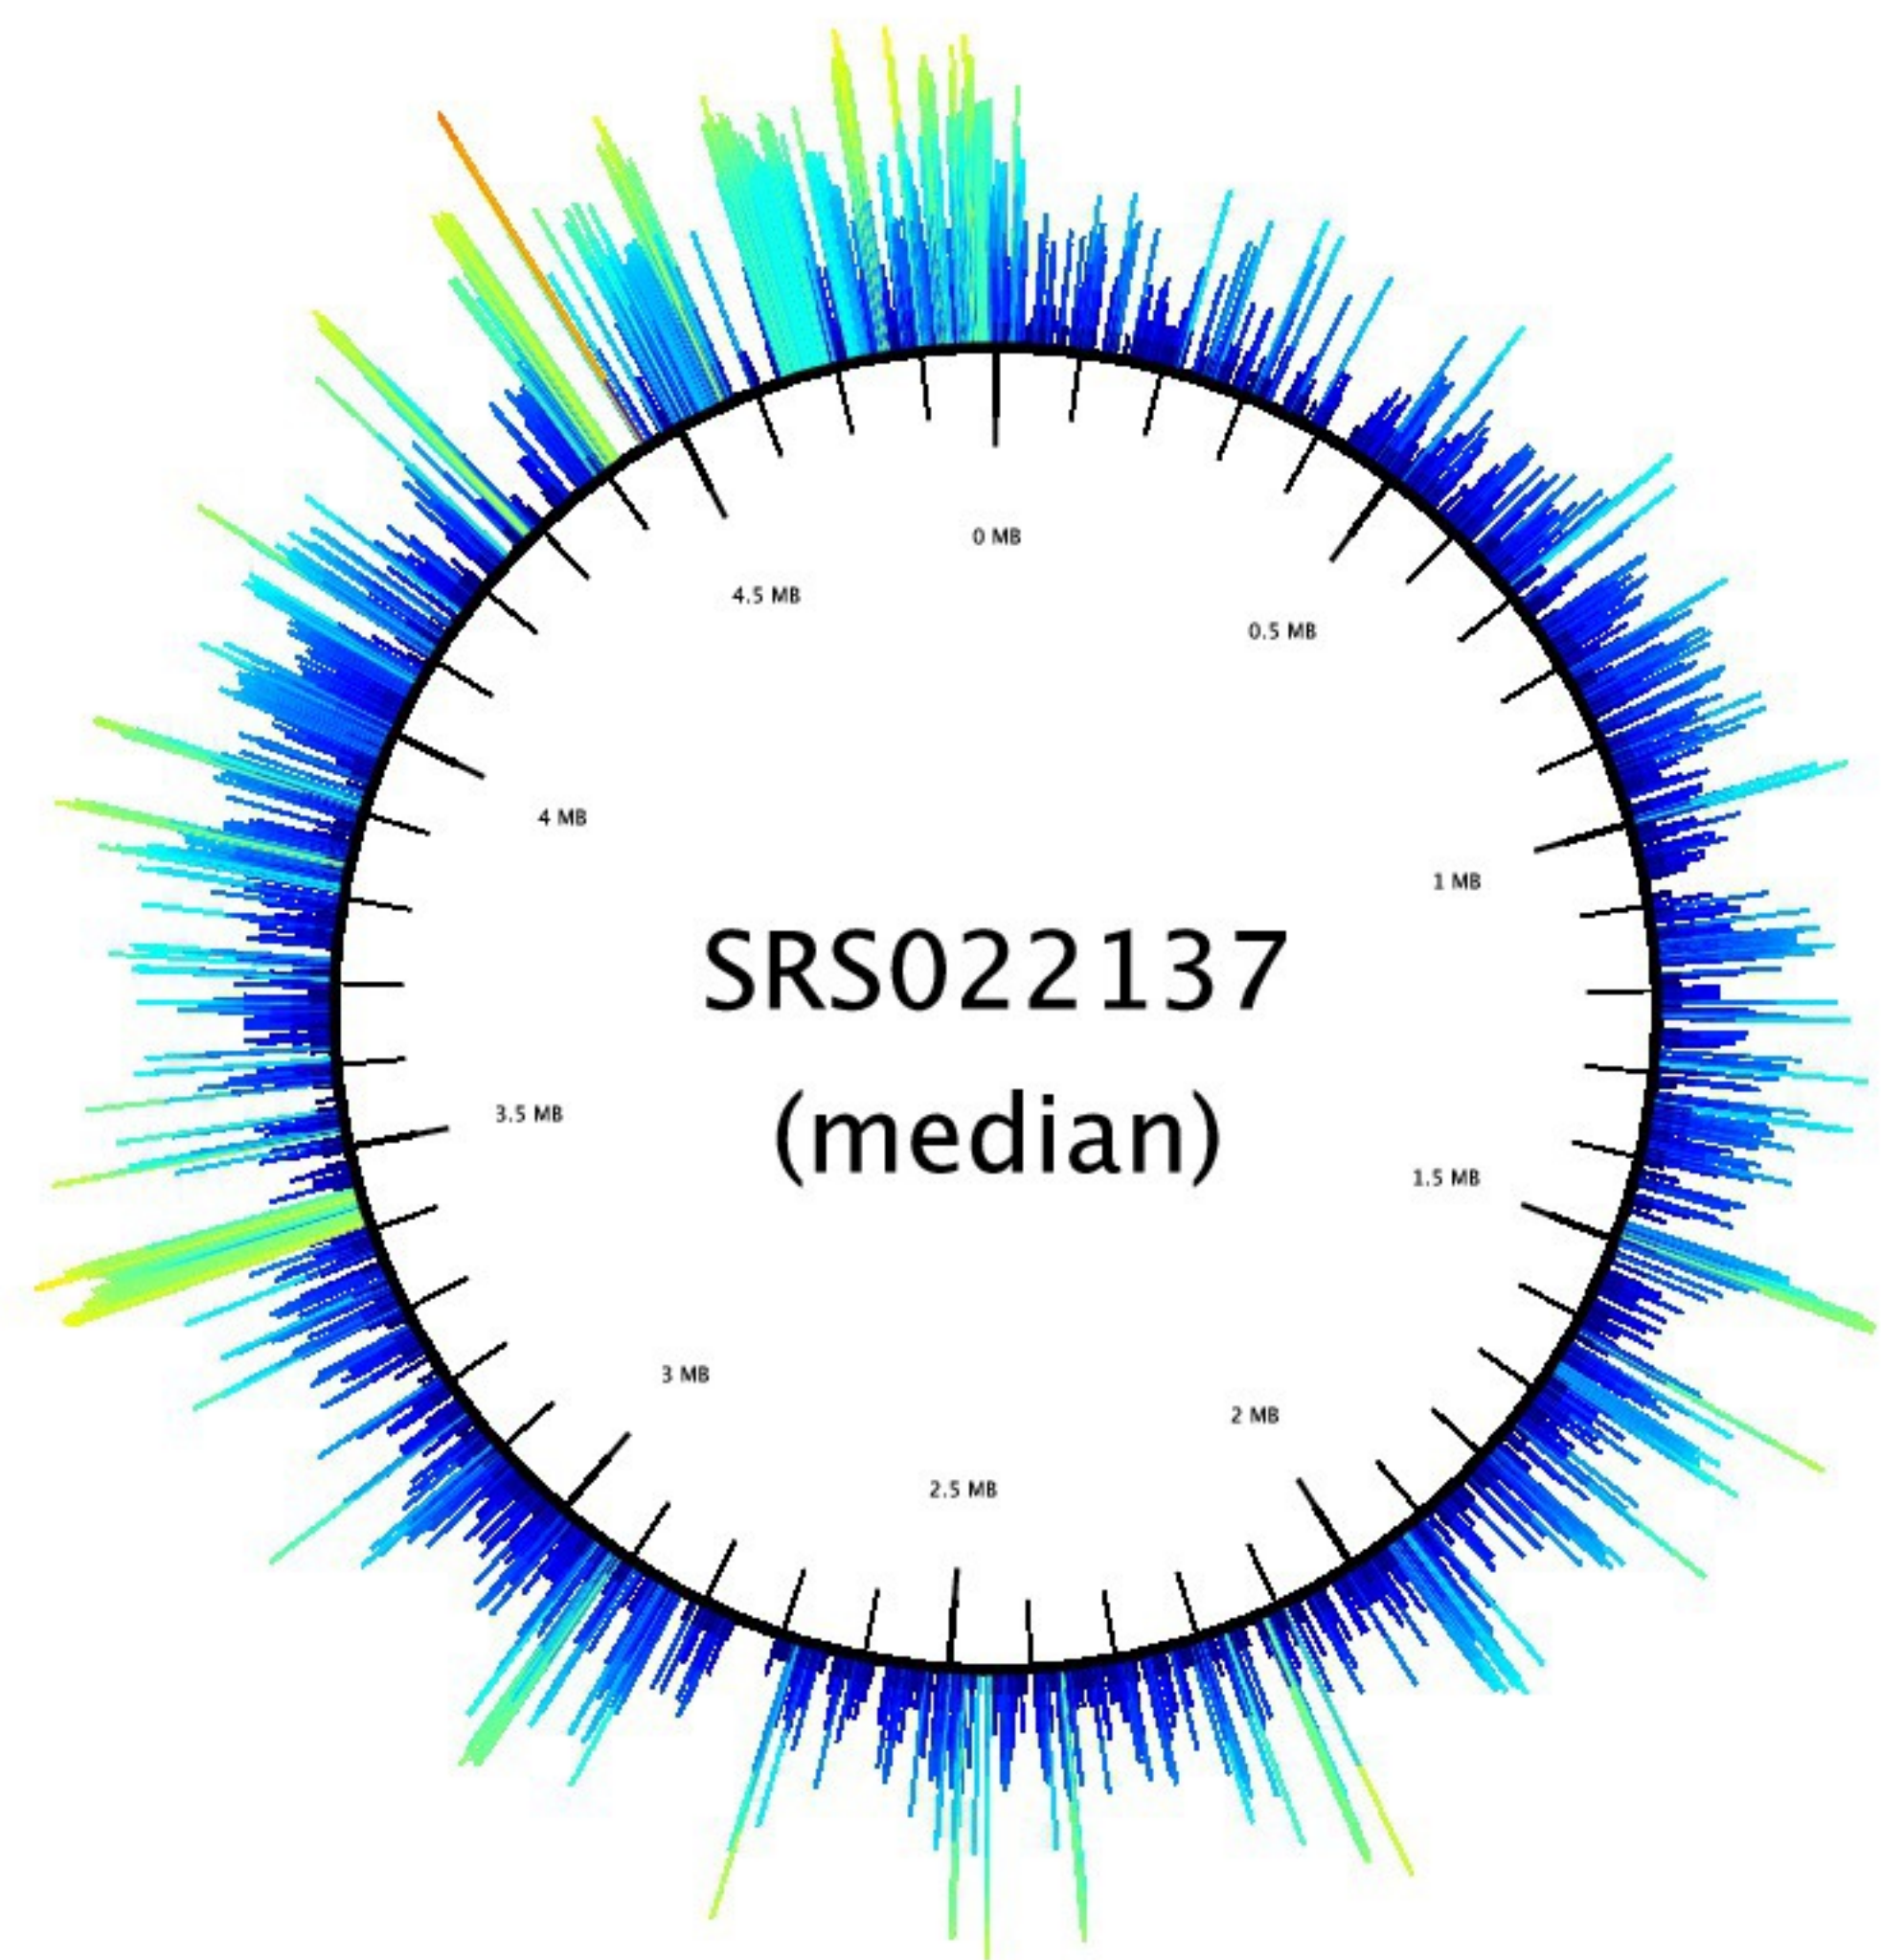

*Bacteroides fragilis* YCH46

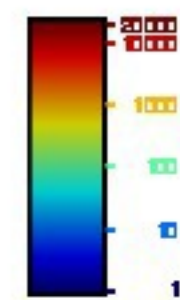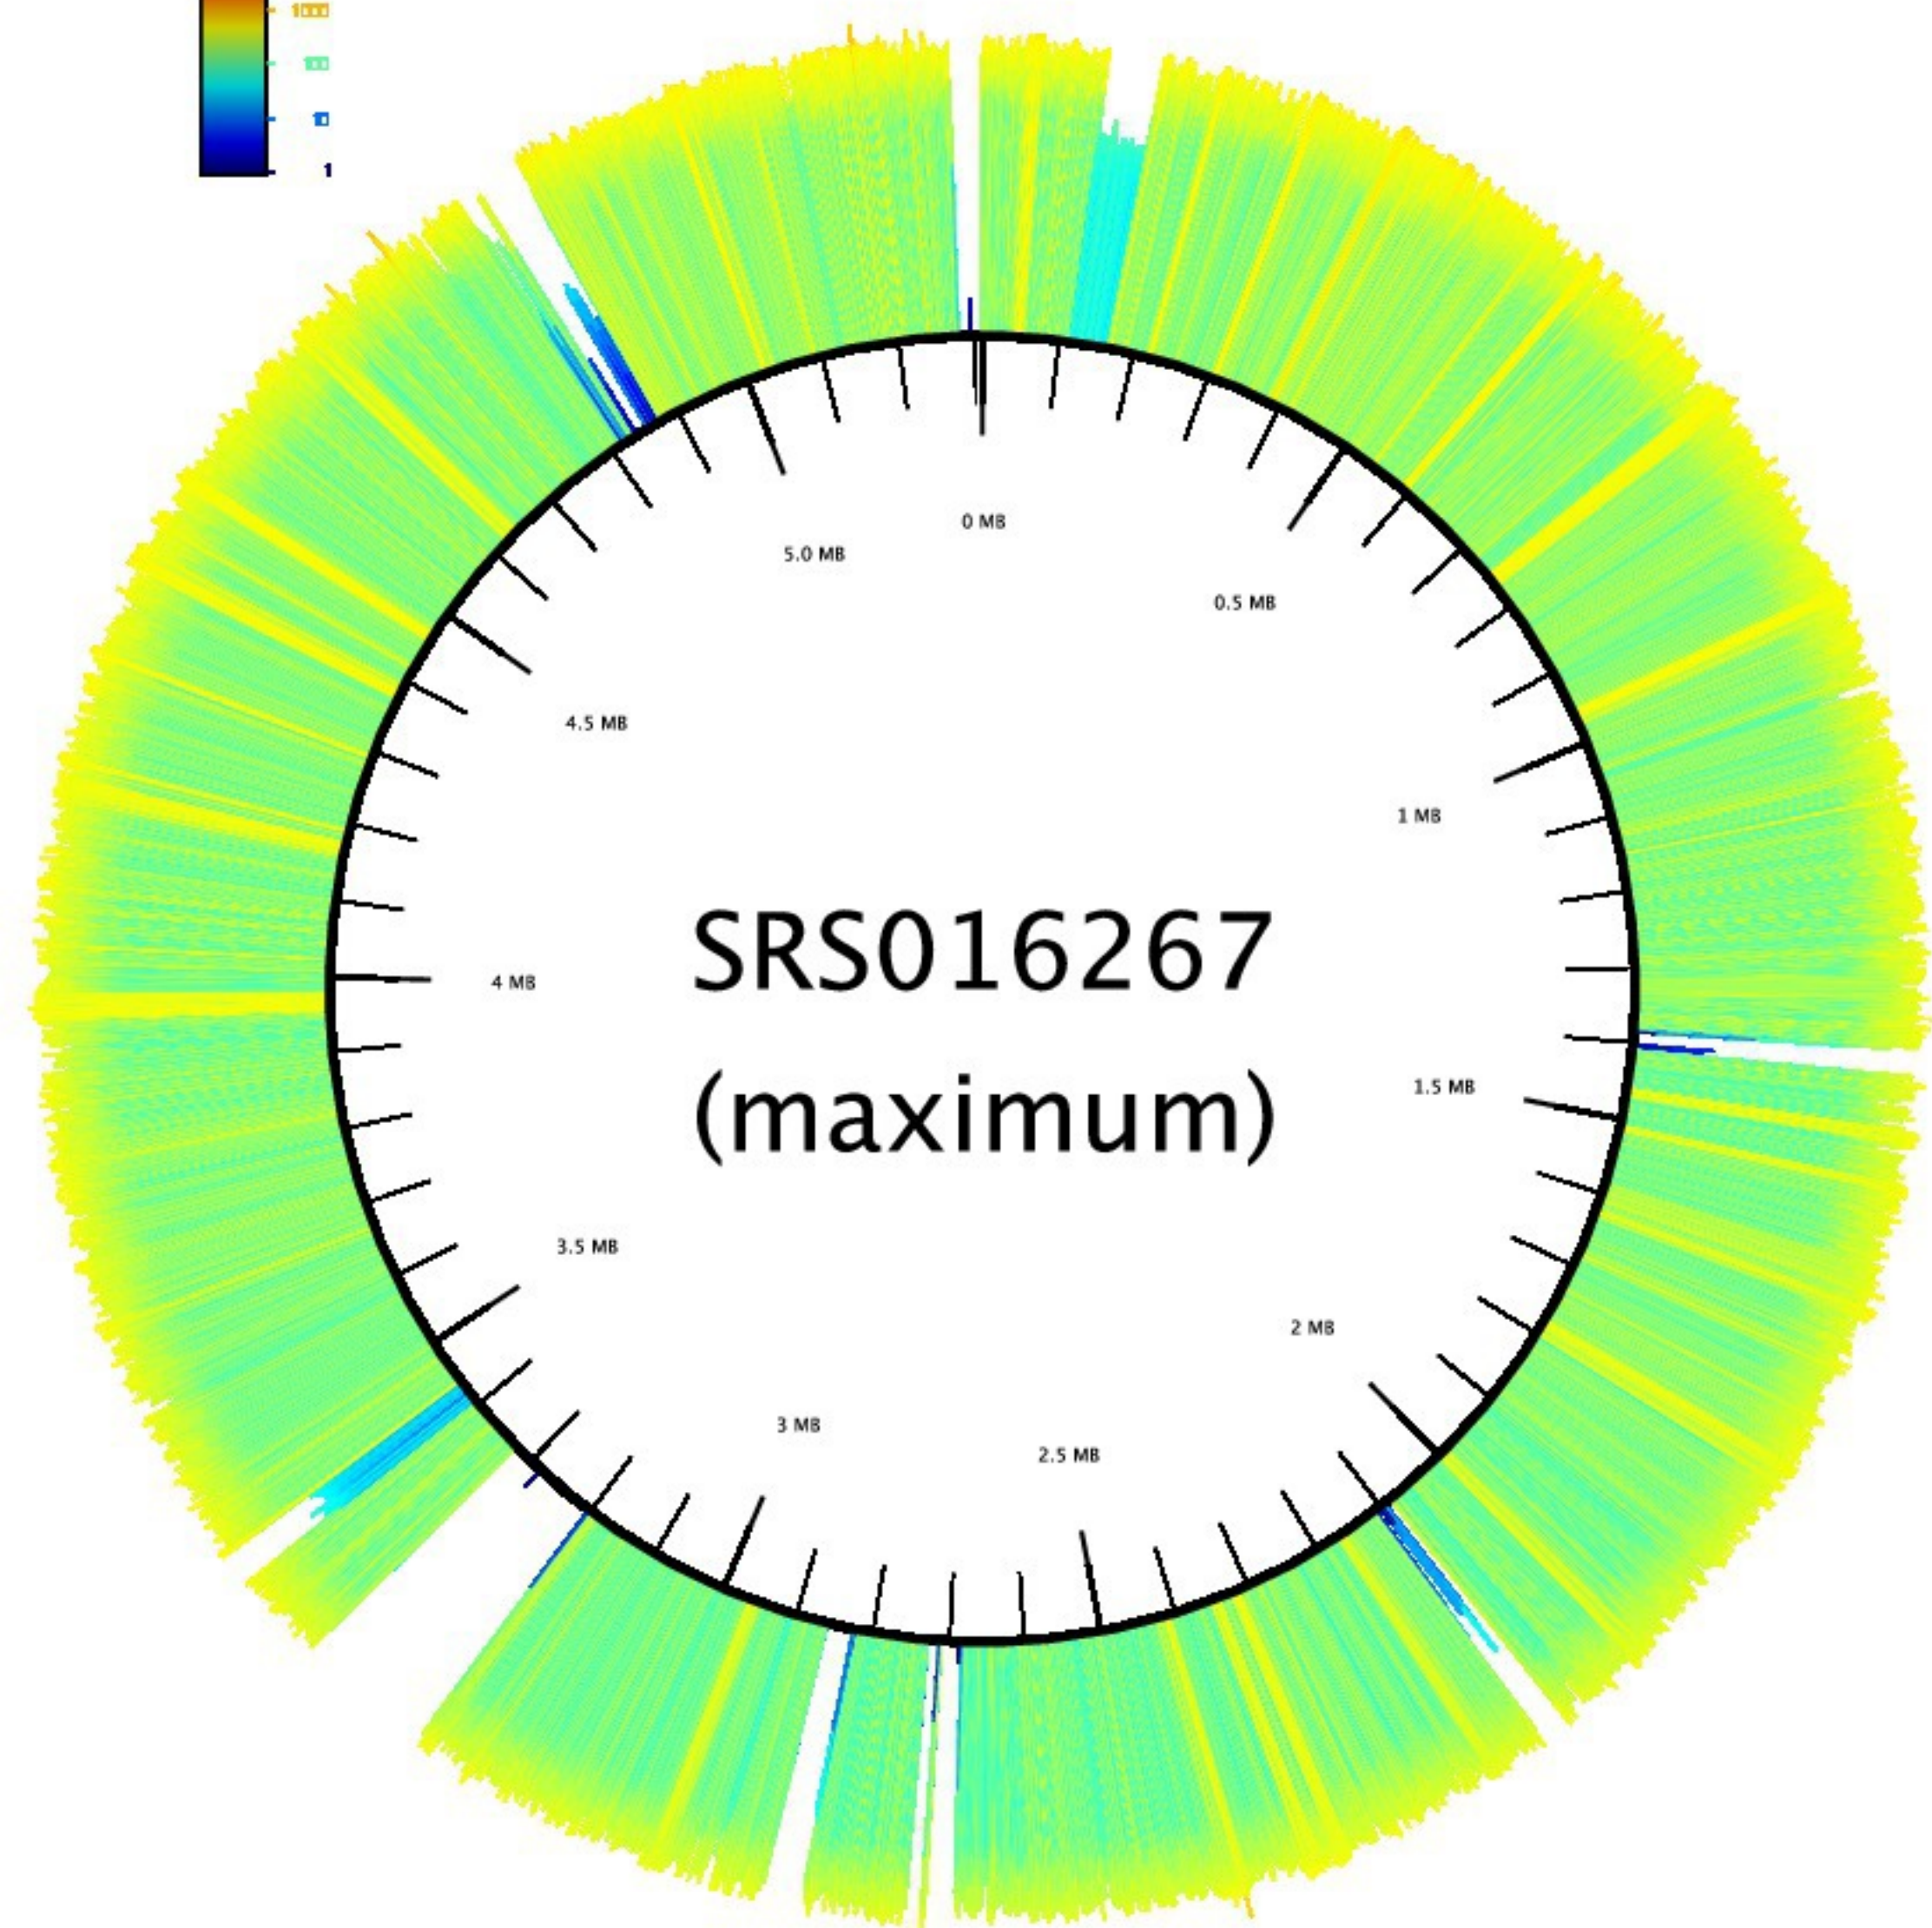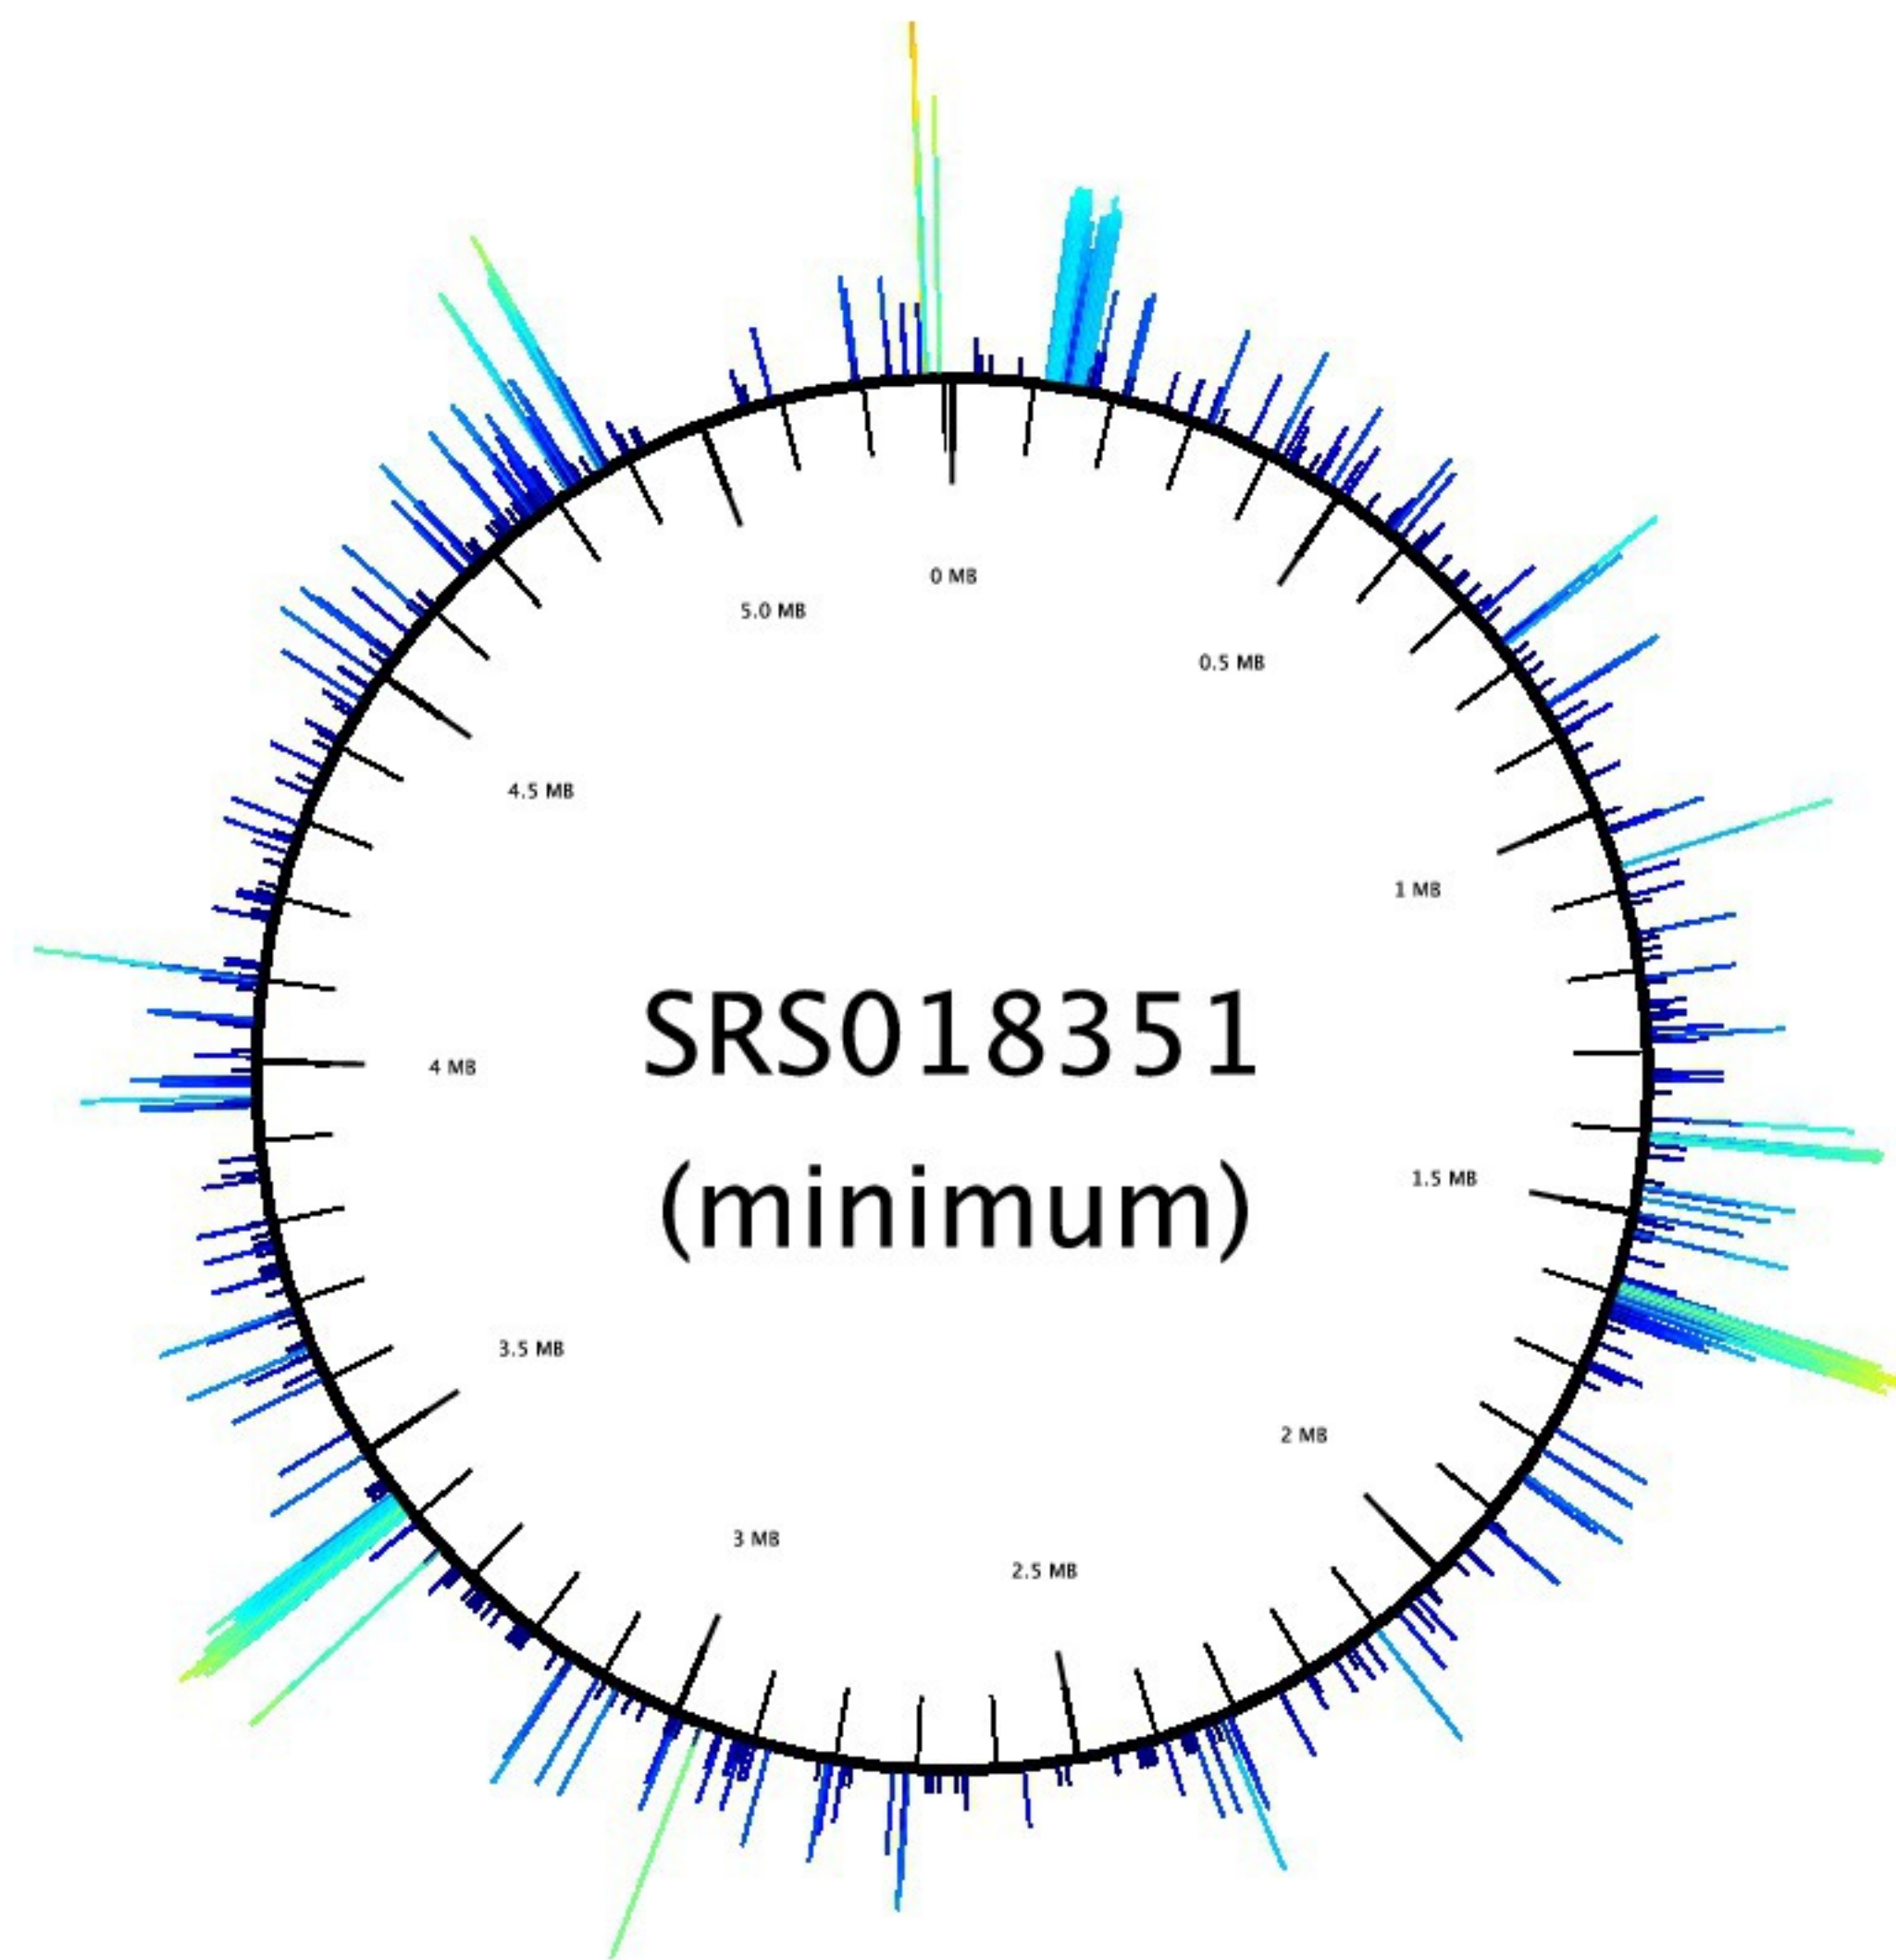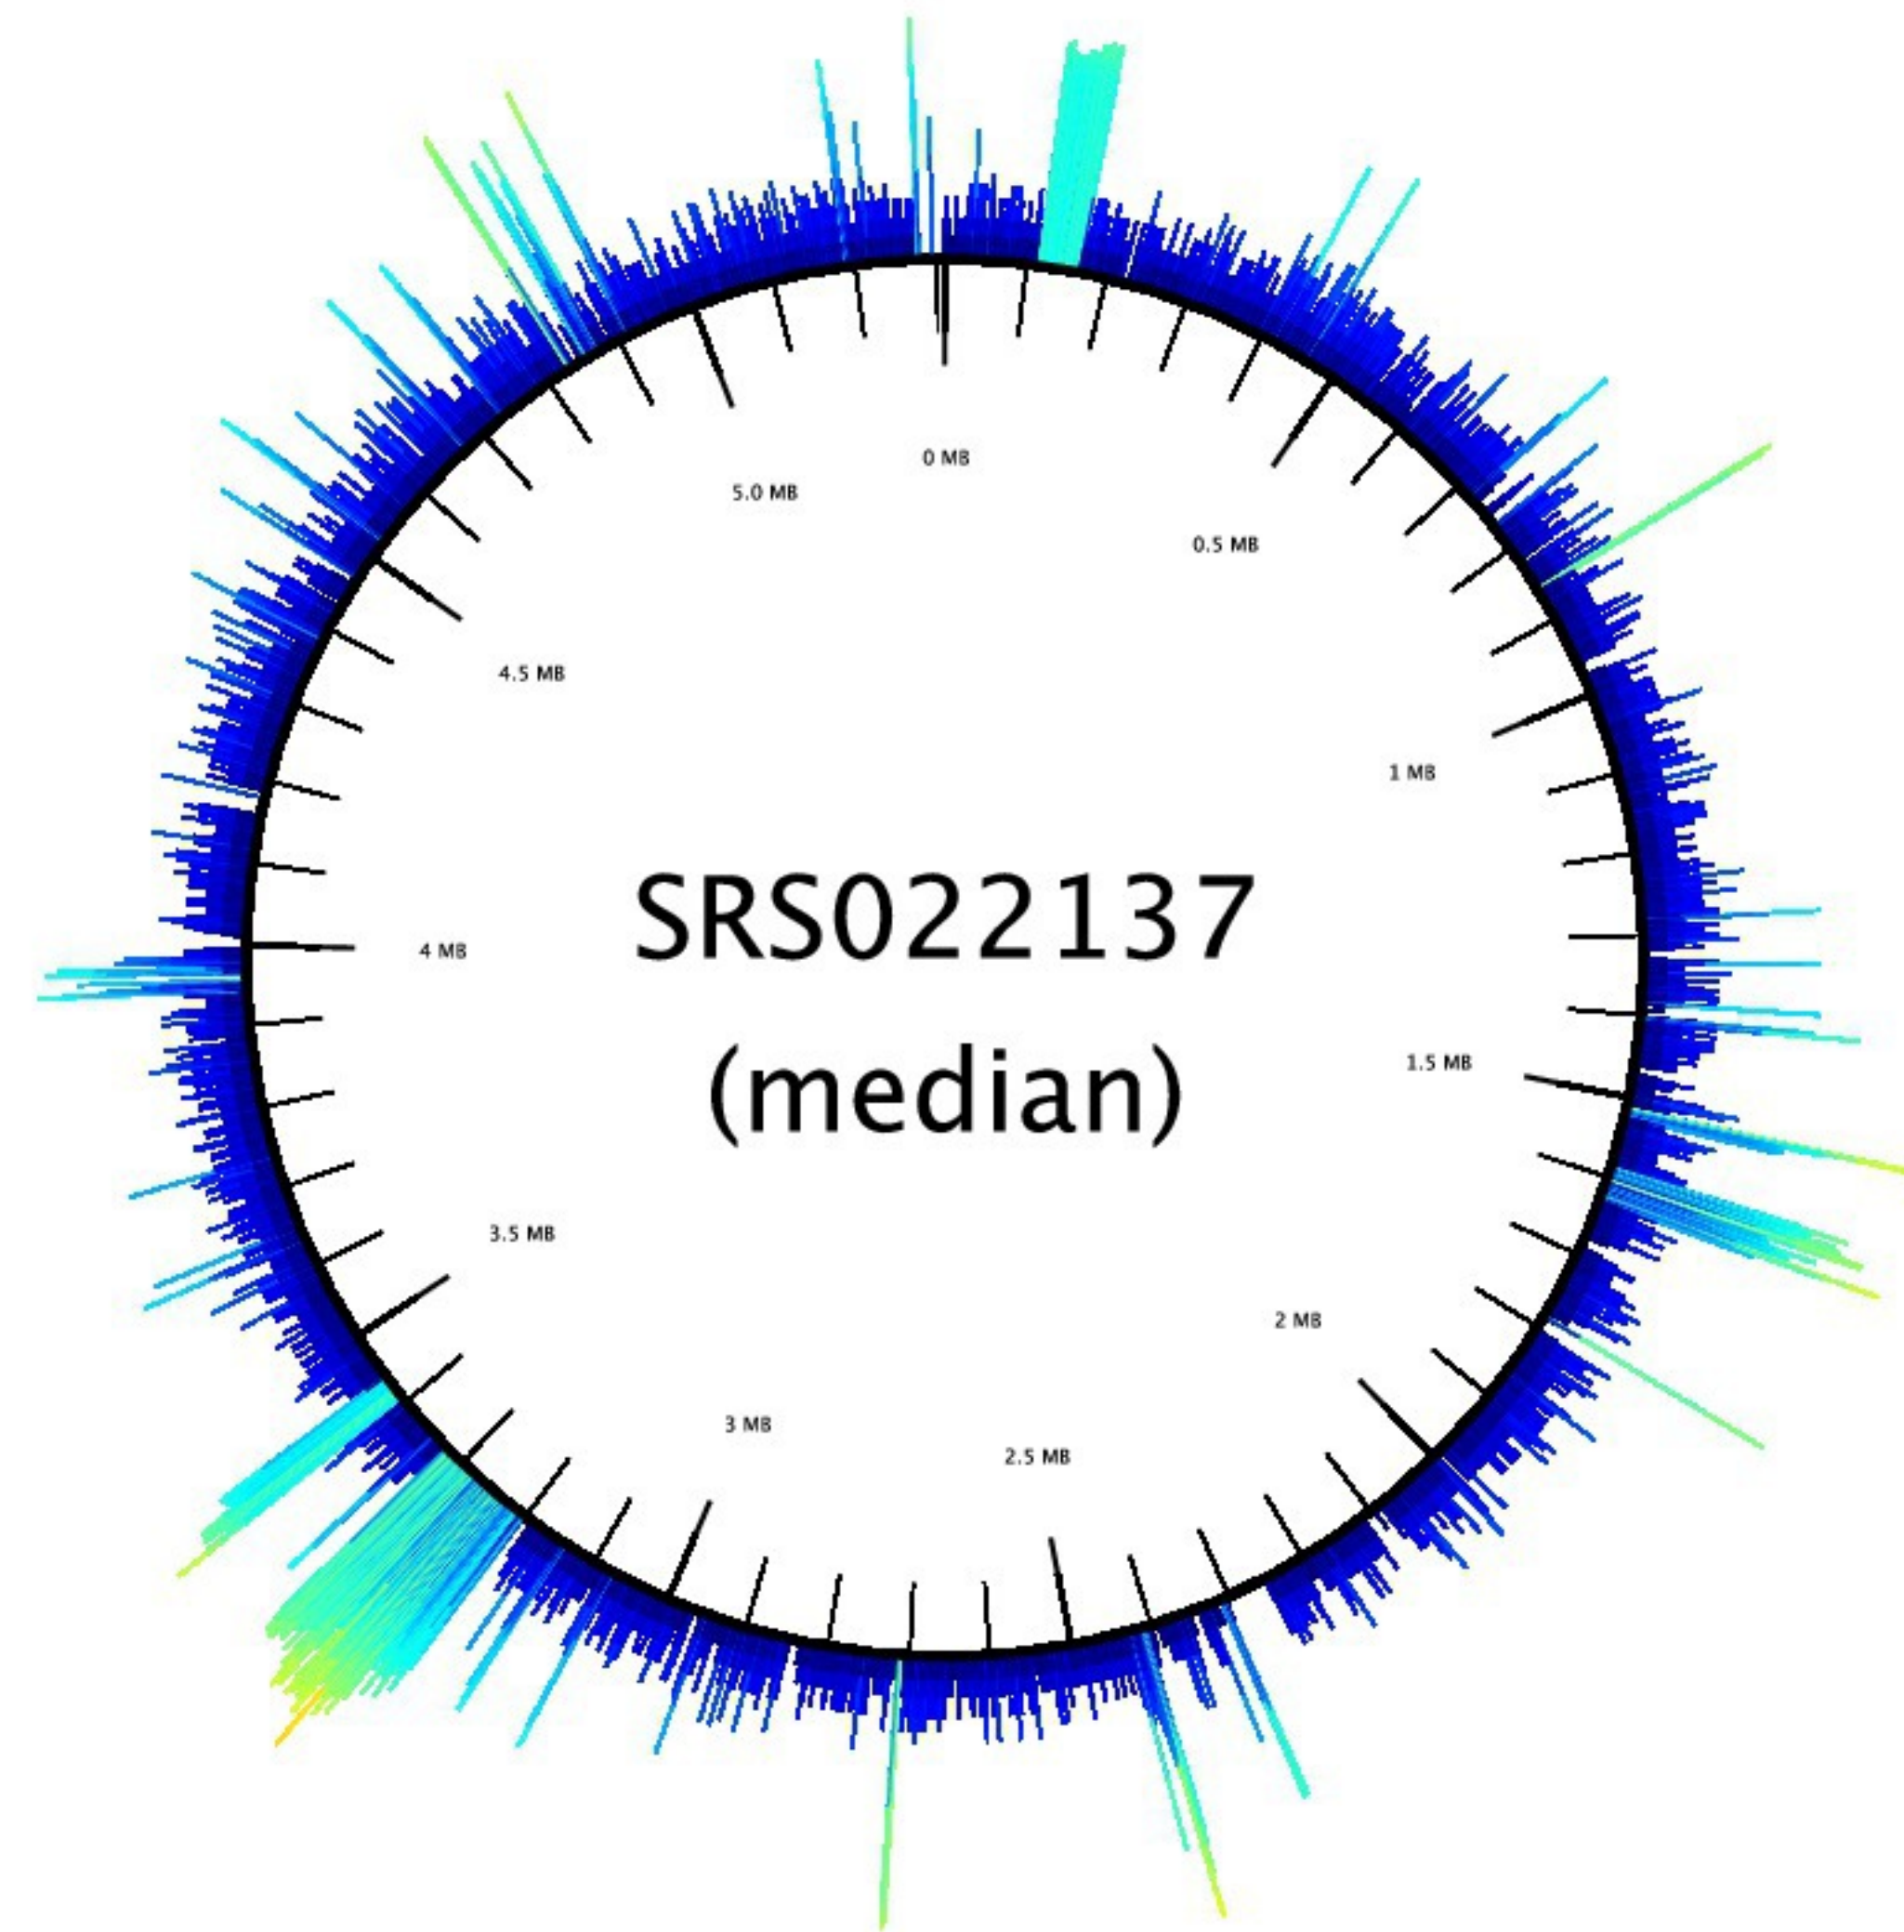

*Bacteroides ovatus* ATCC 8483

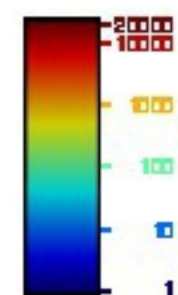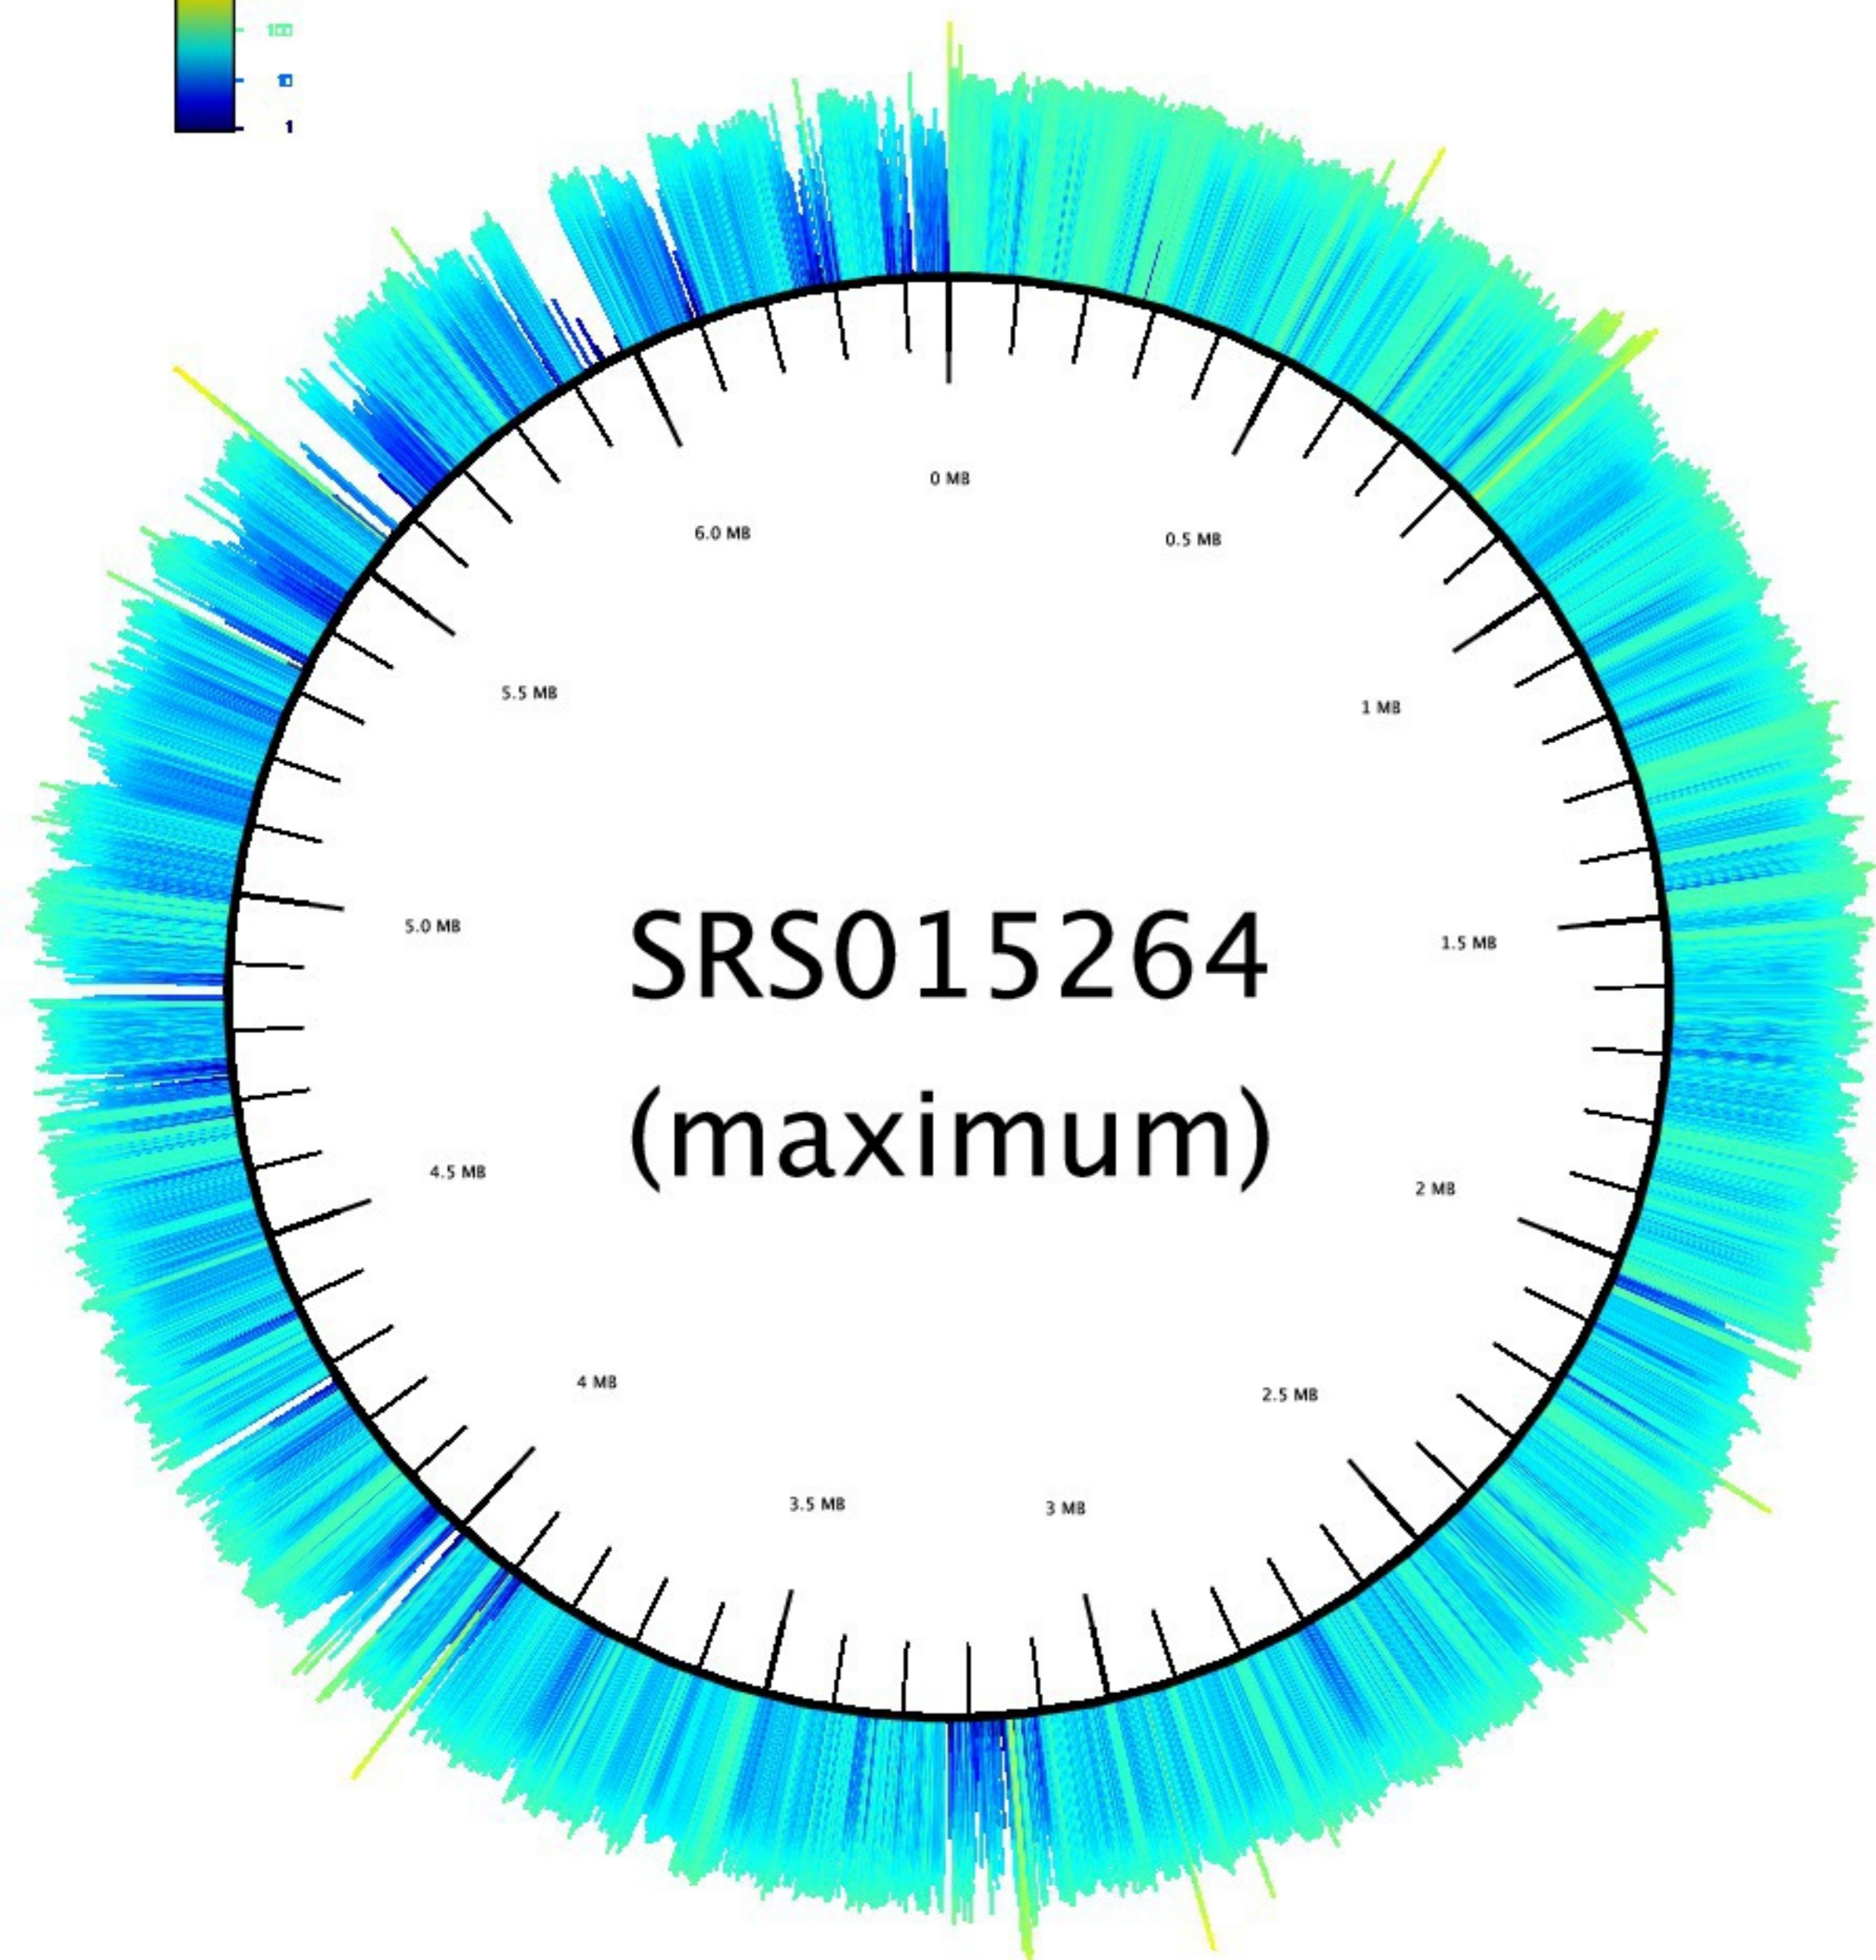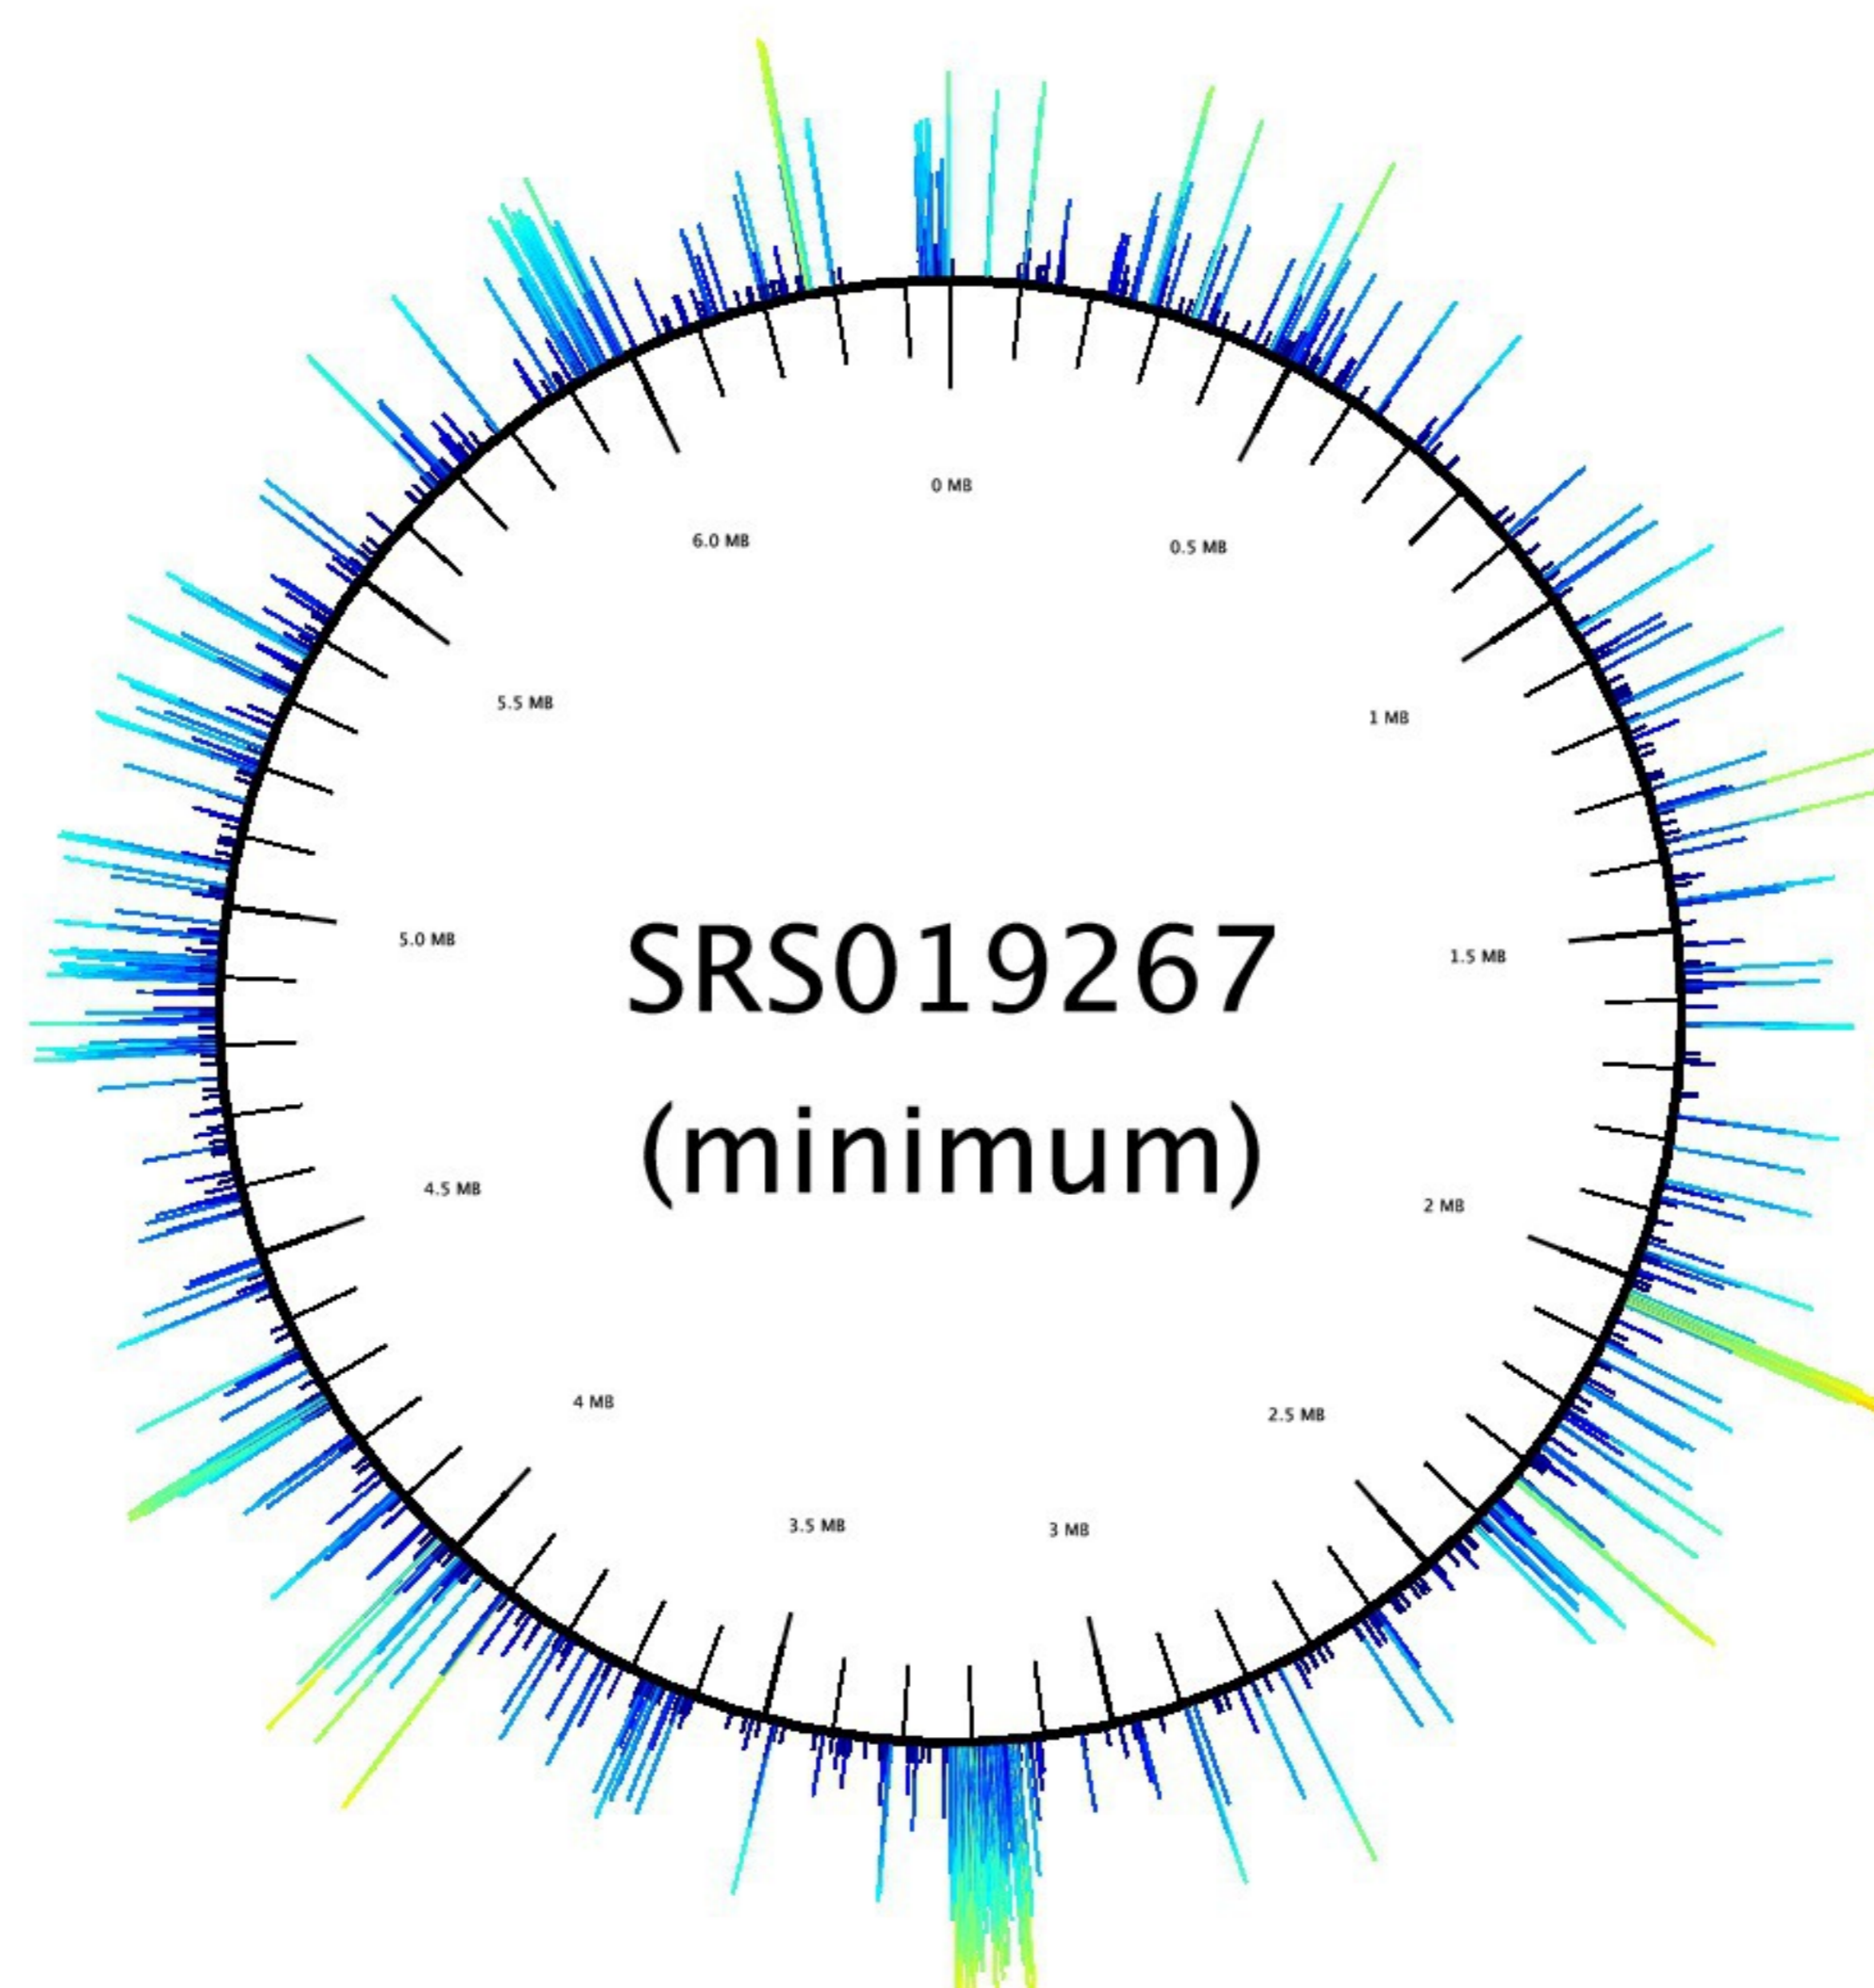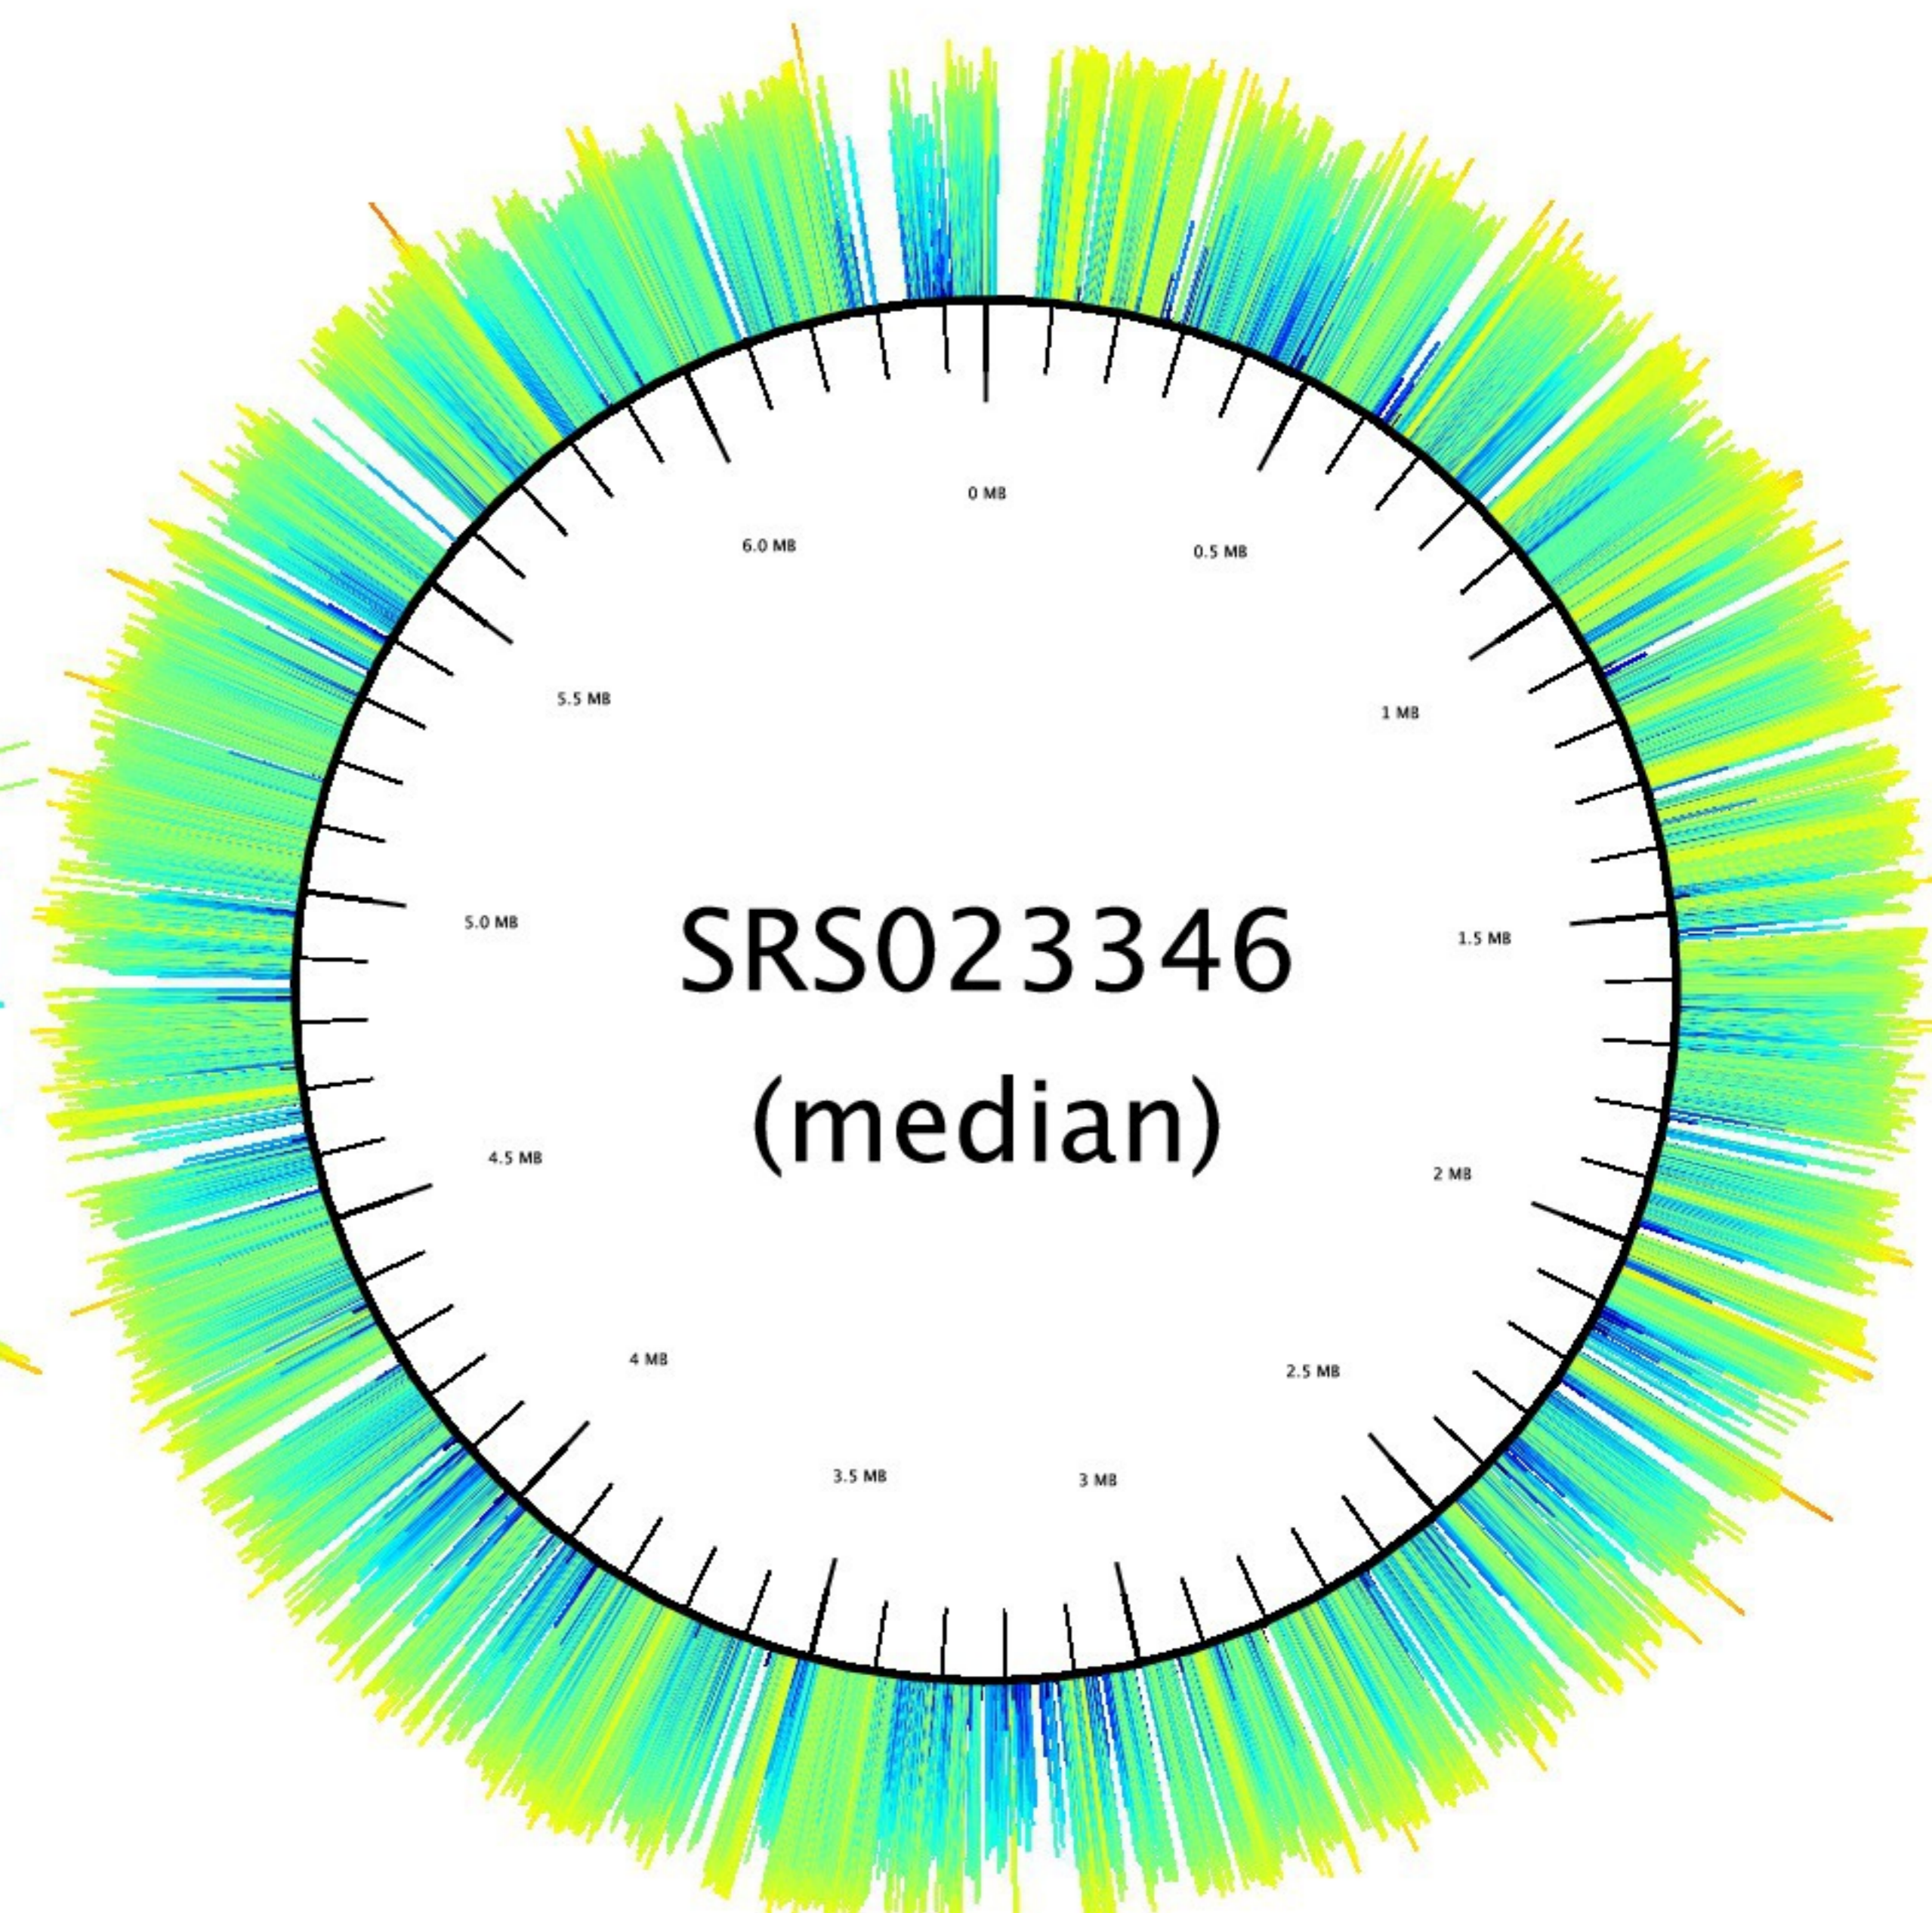

*Bacteroides plebeius* DSM 17135

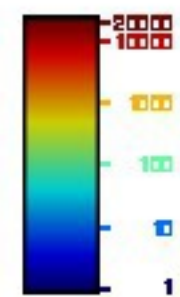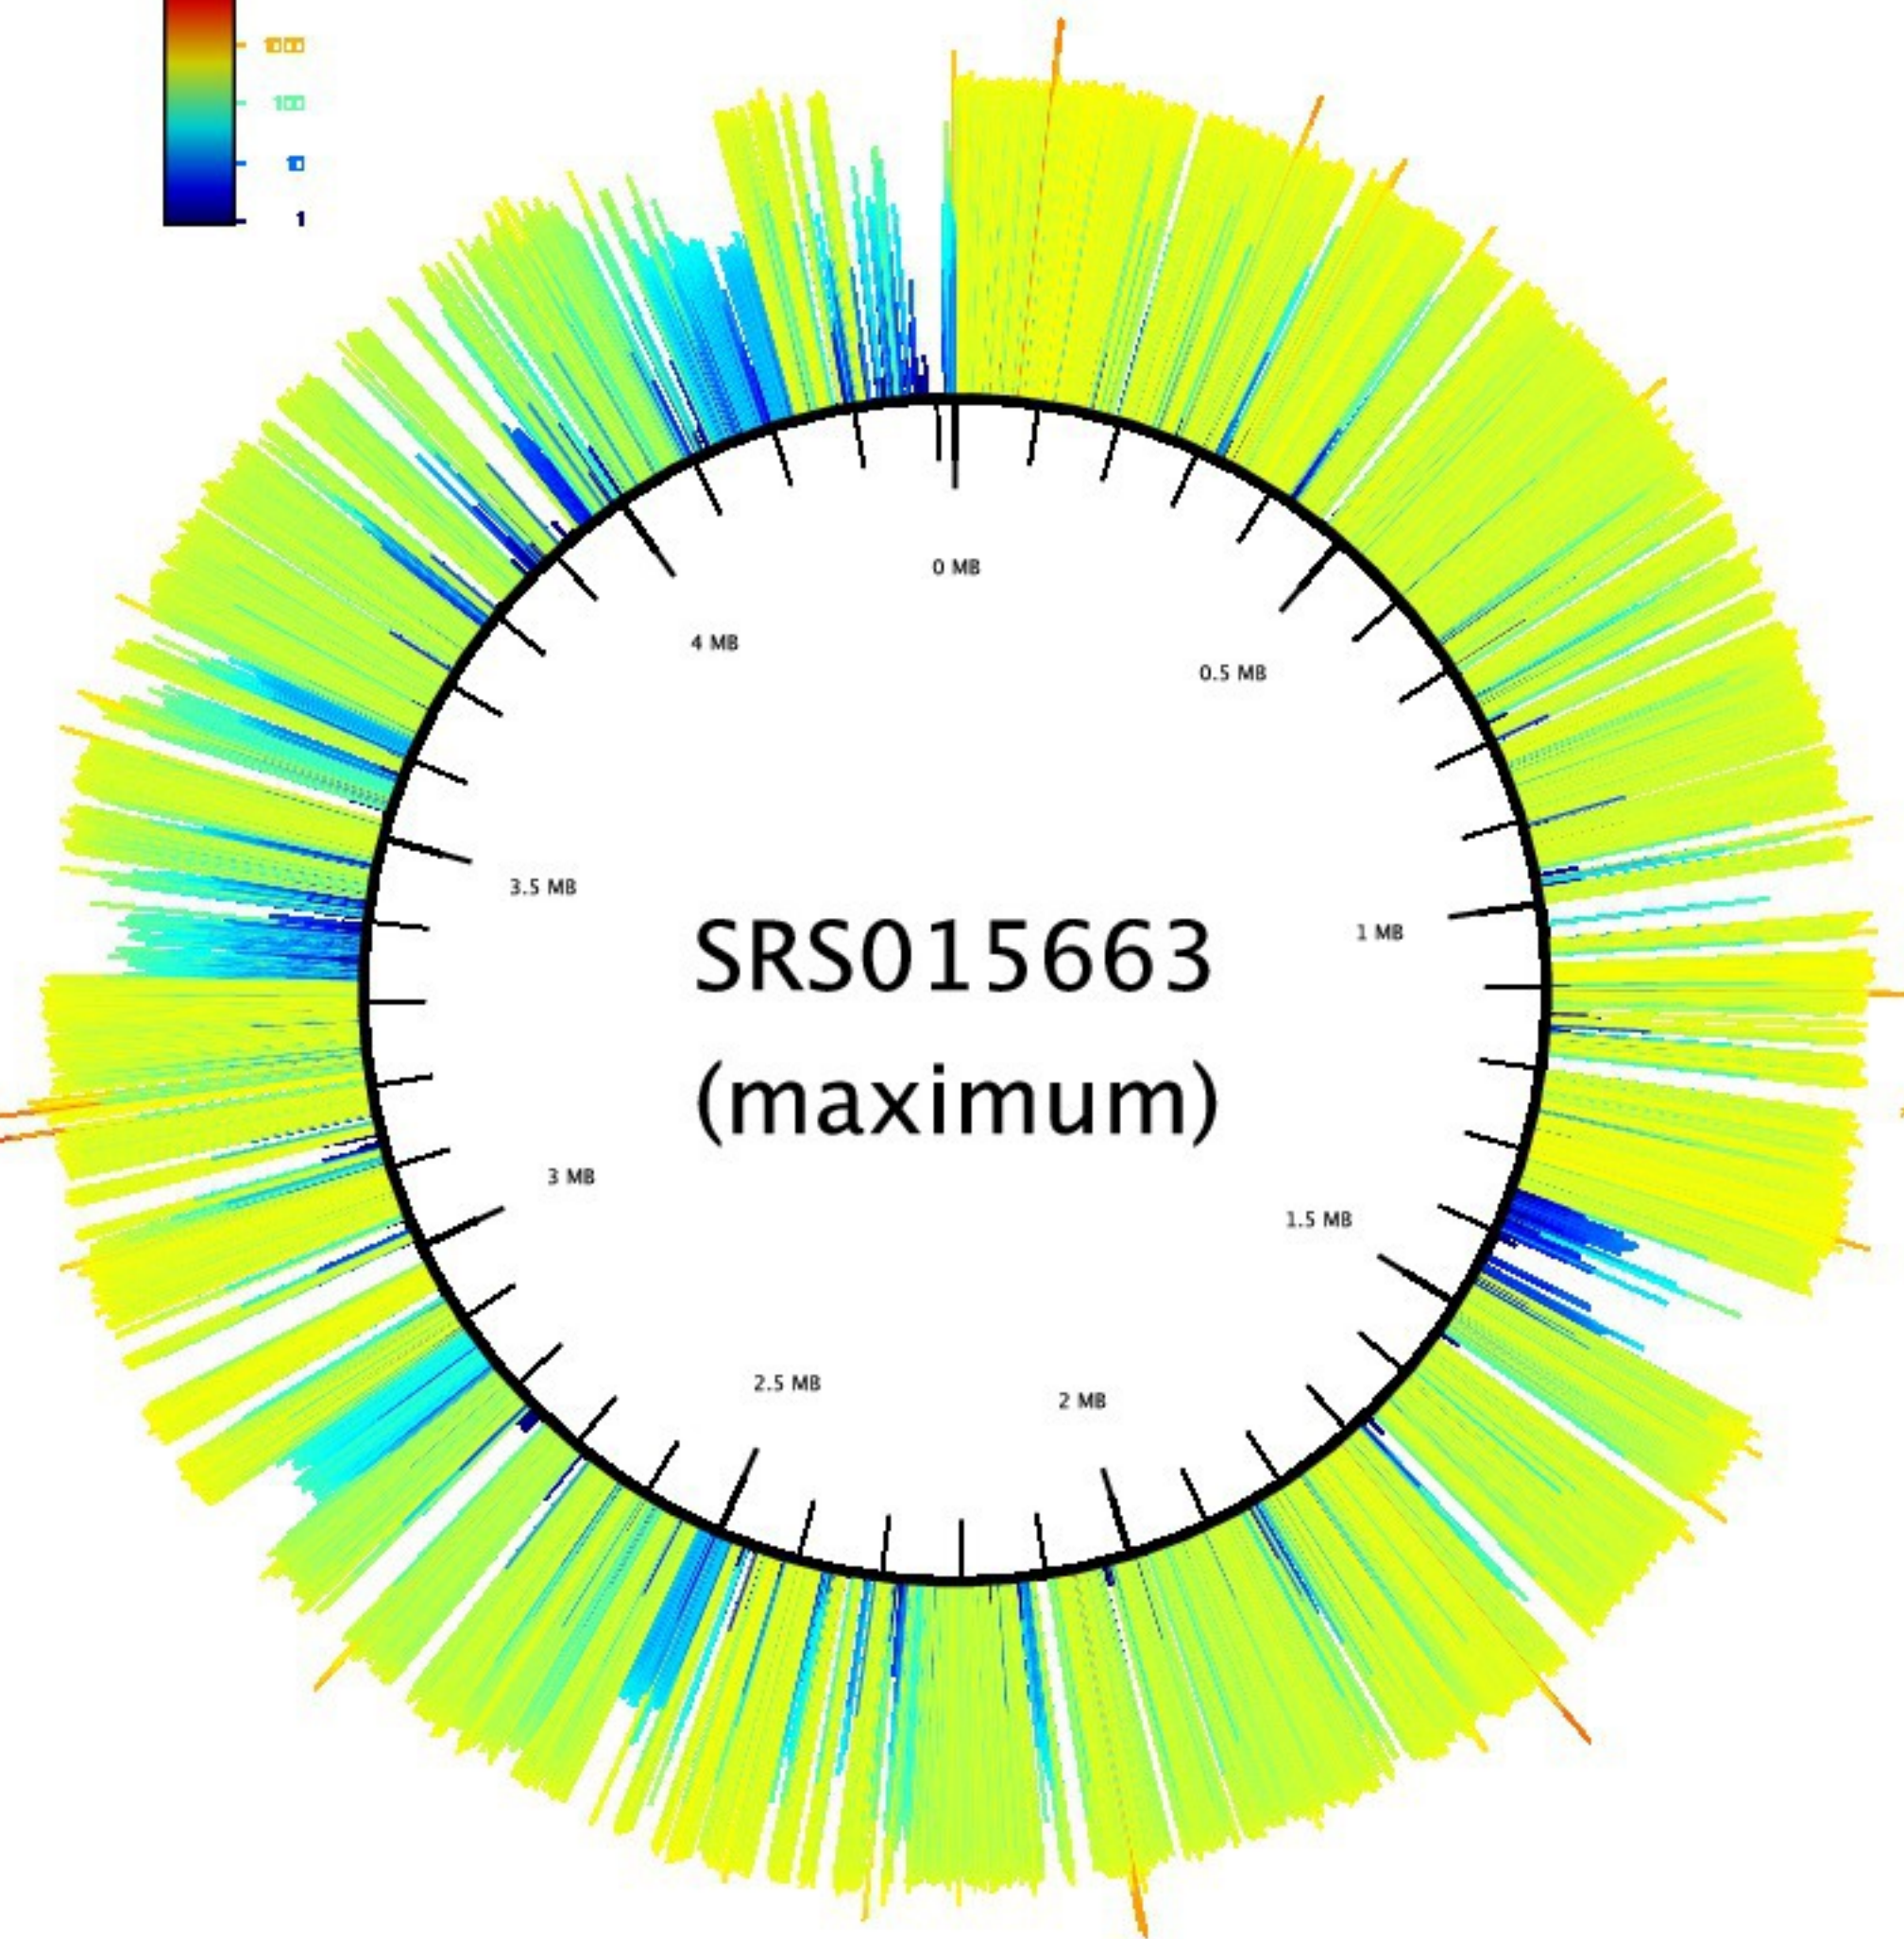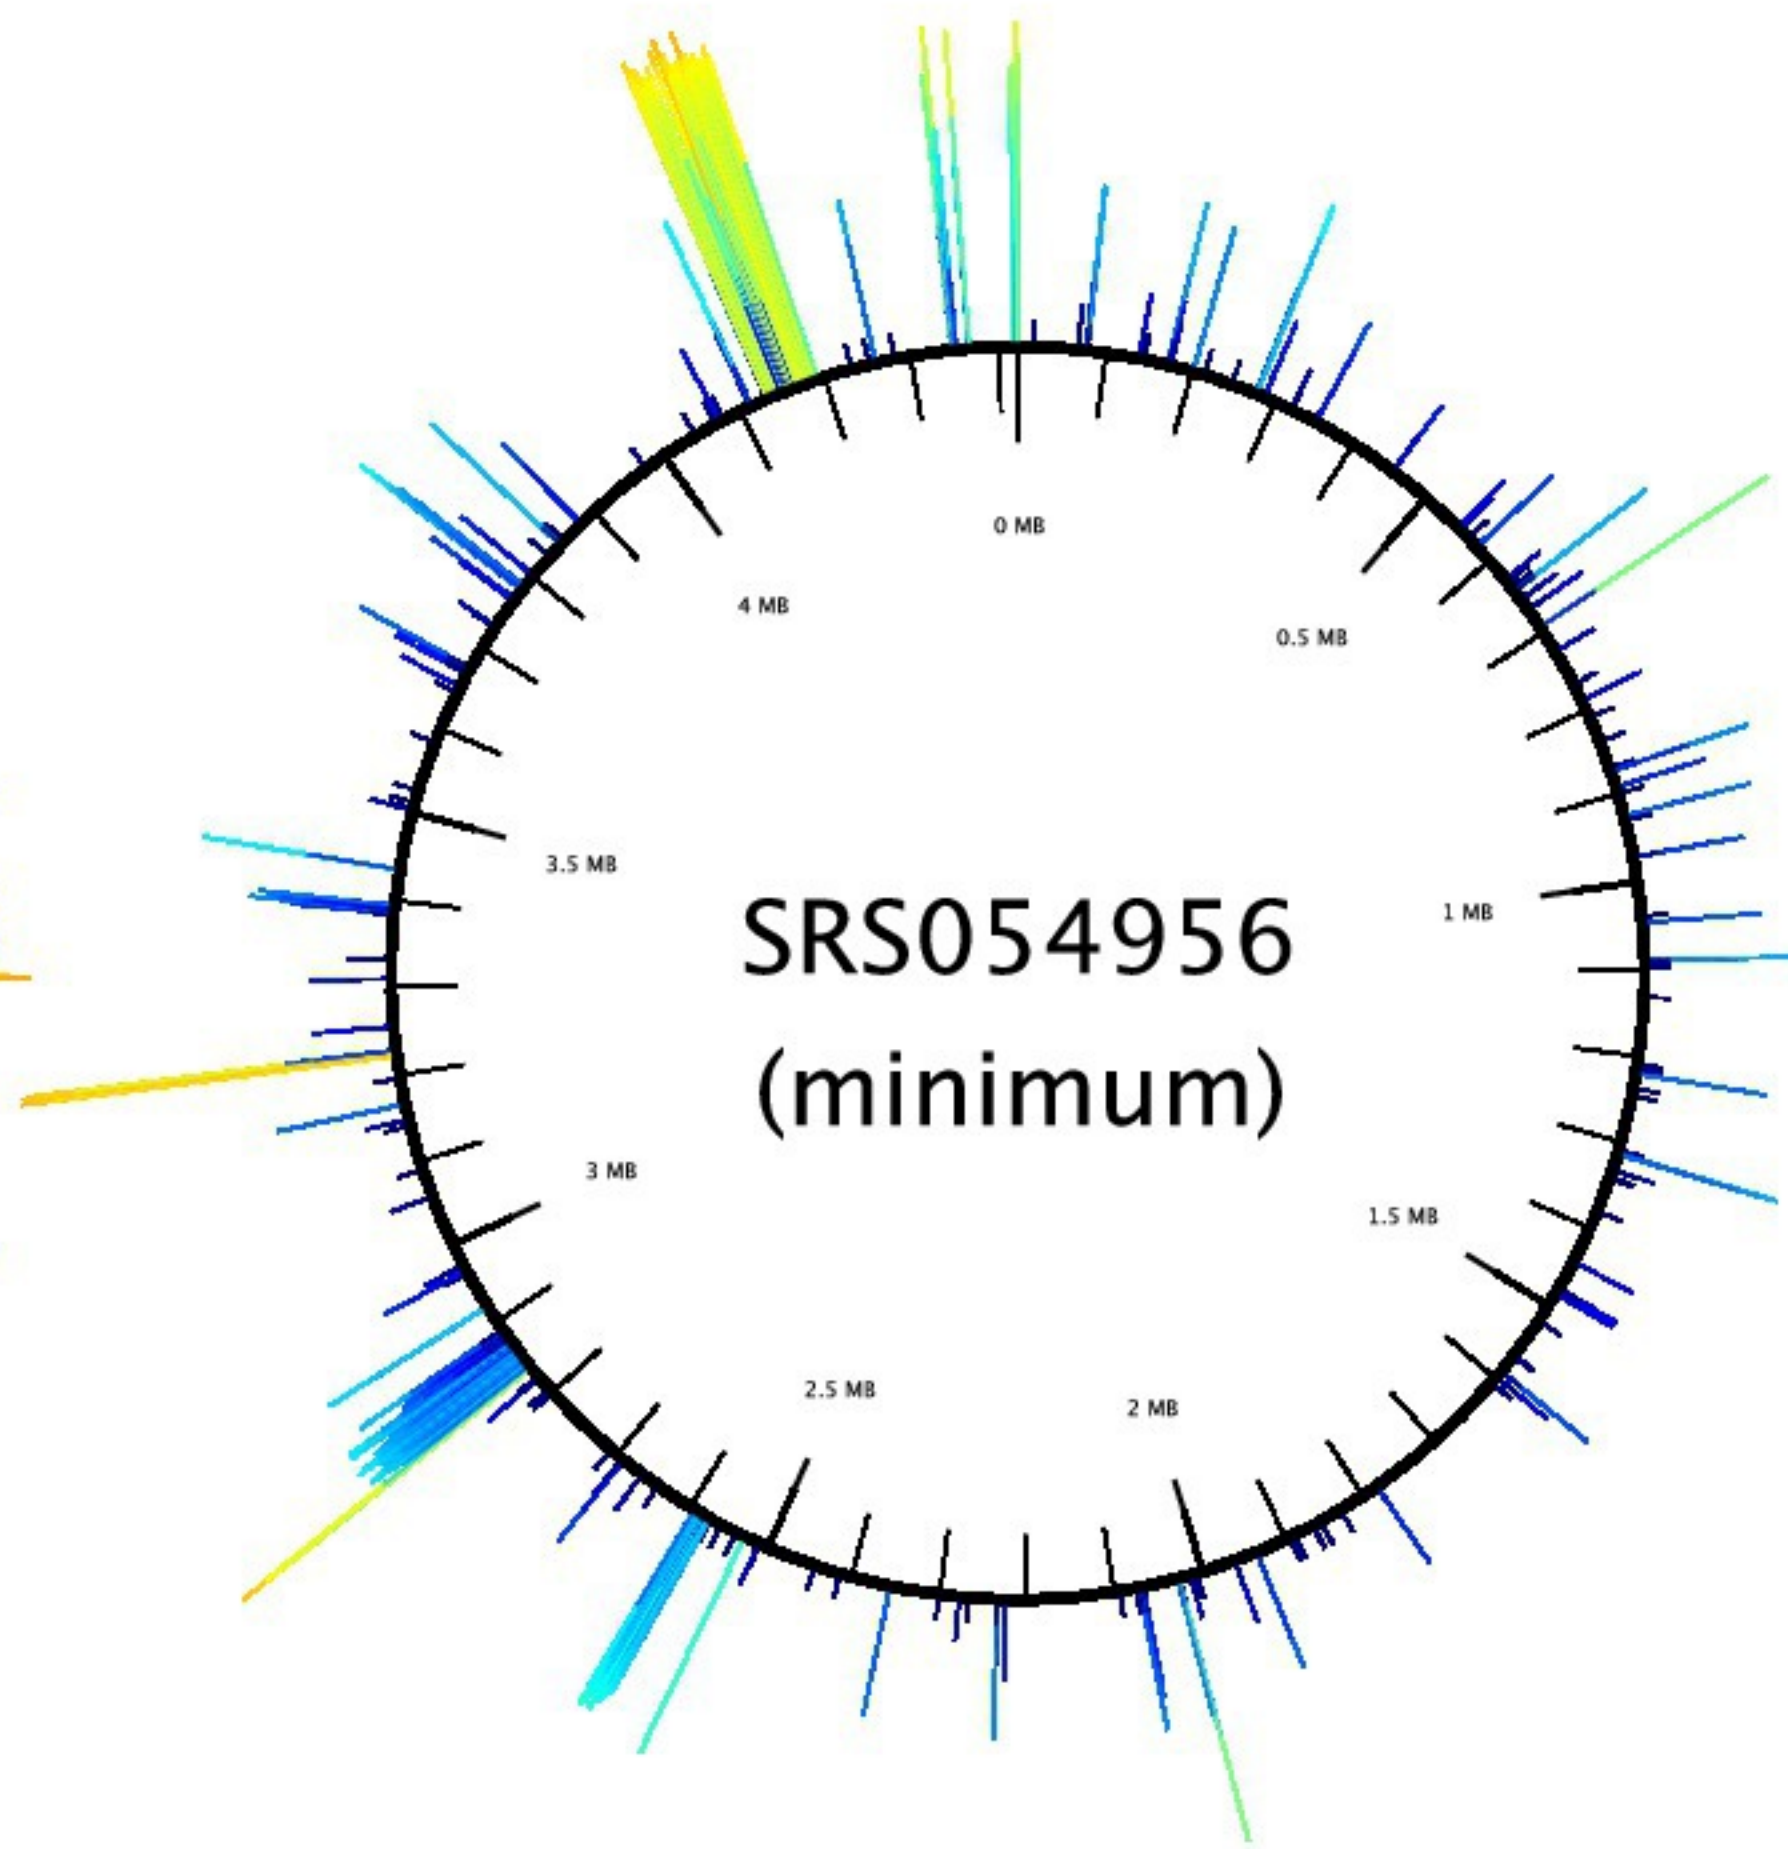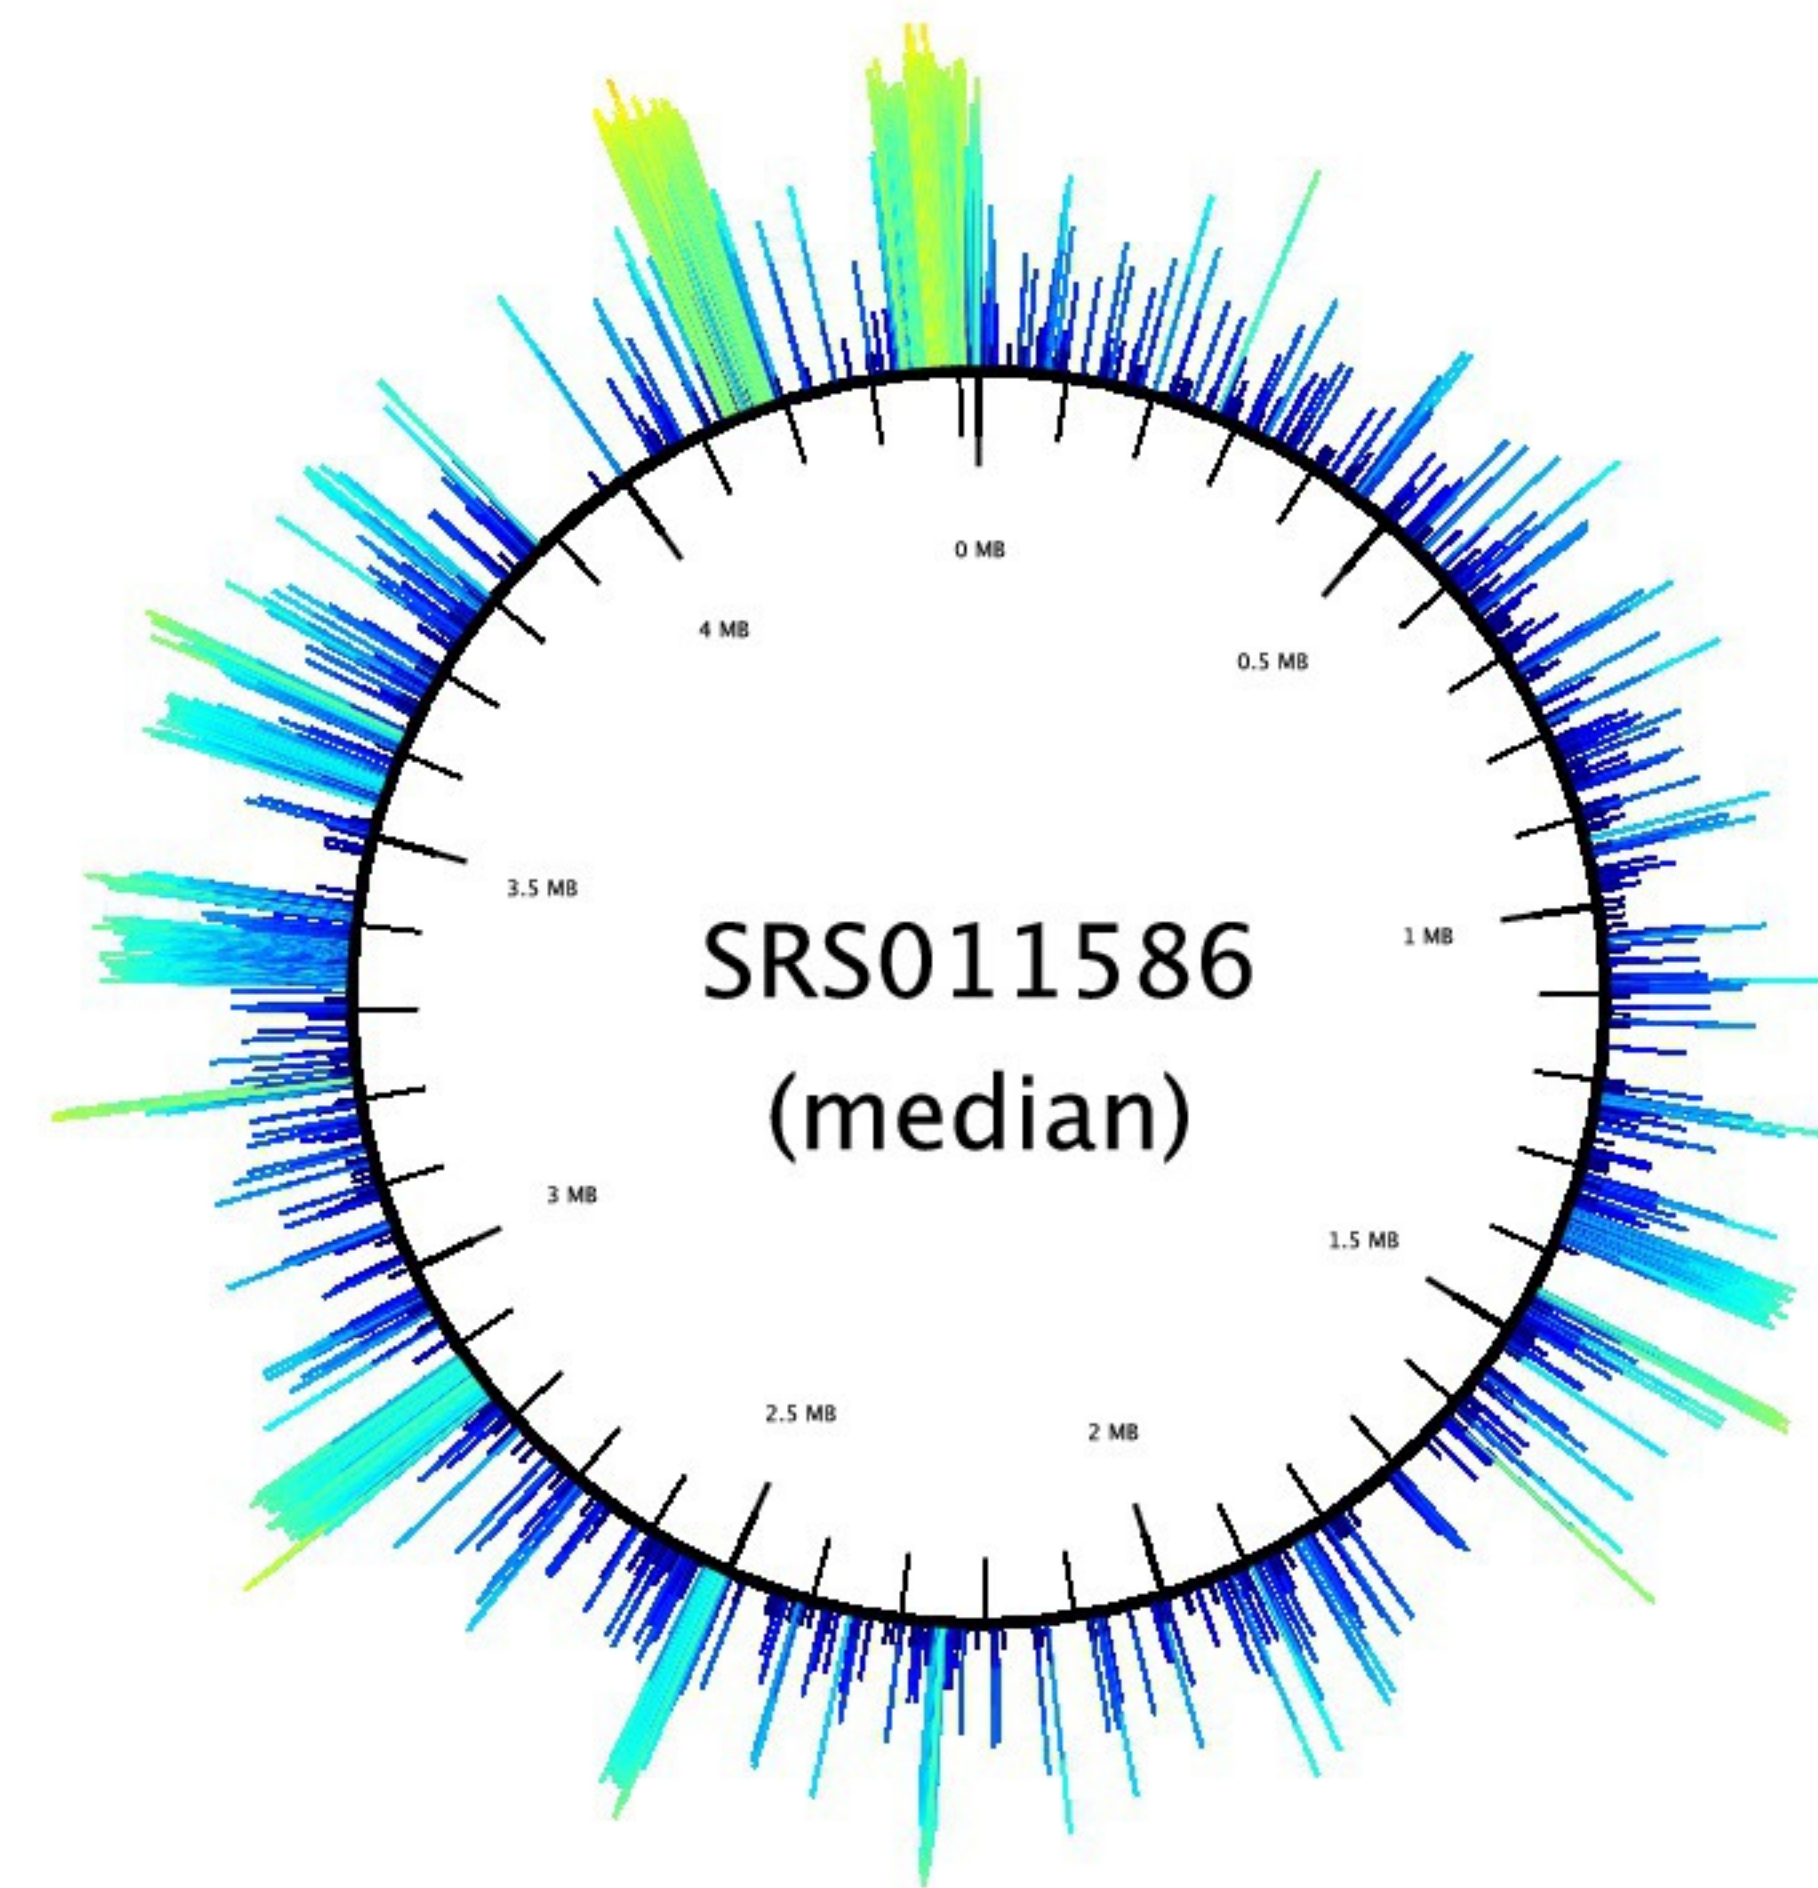

*Bacteroides* sp. 4\_3\_47FAA

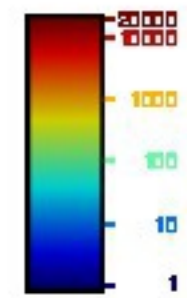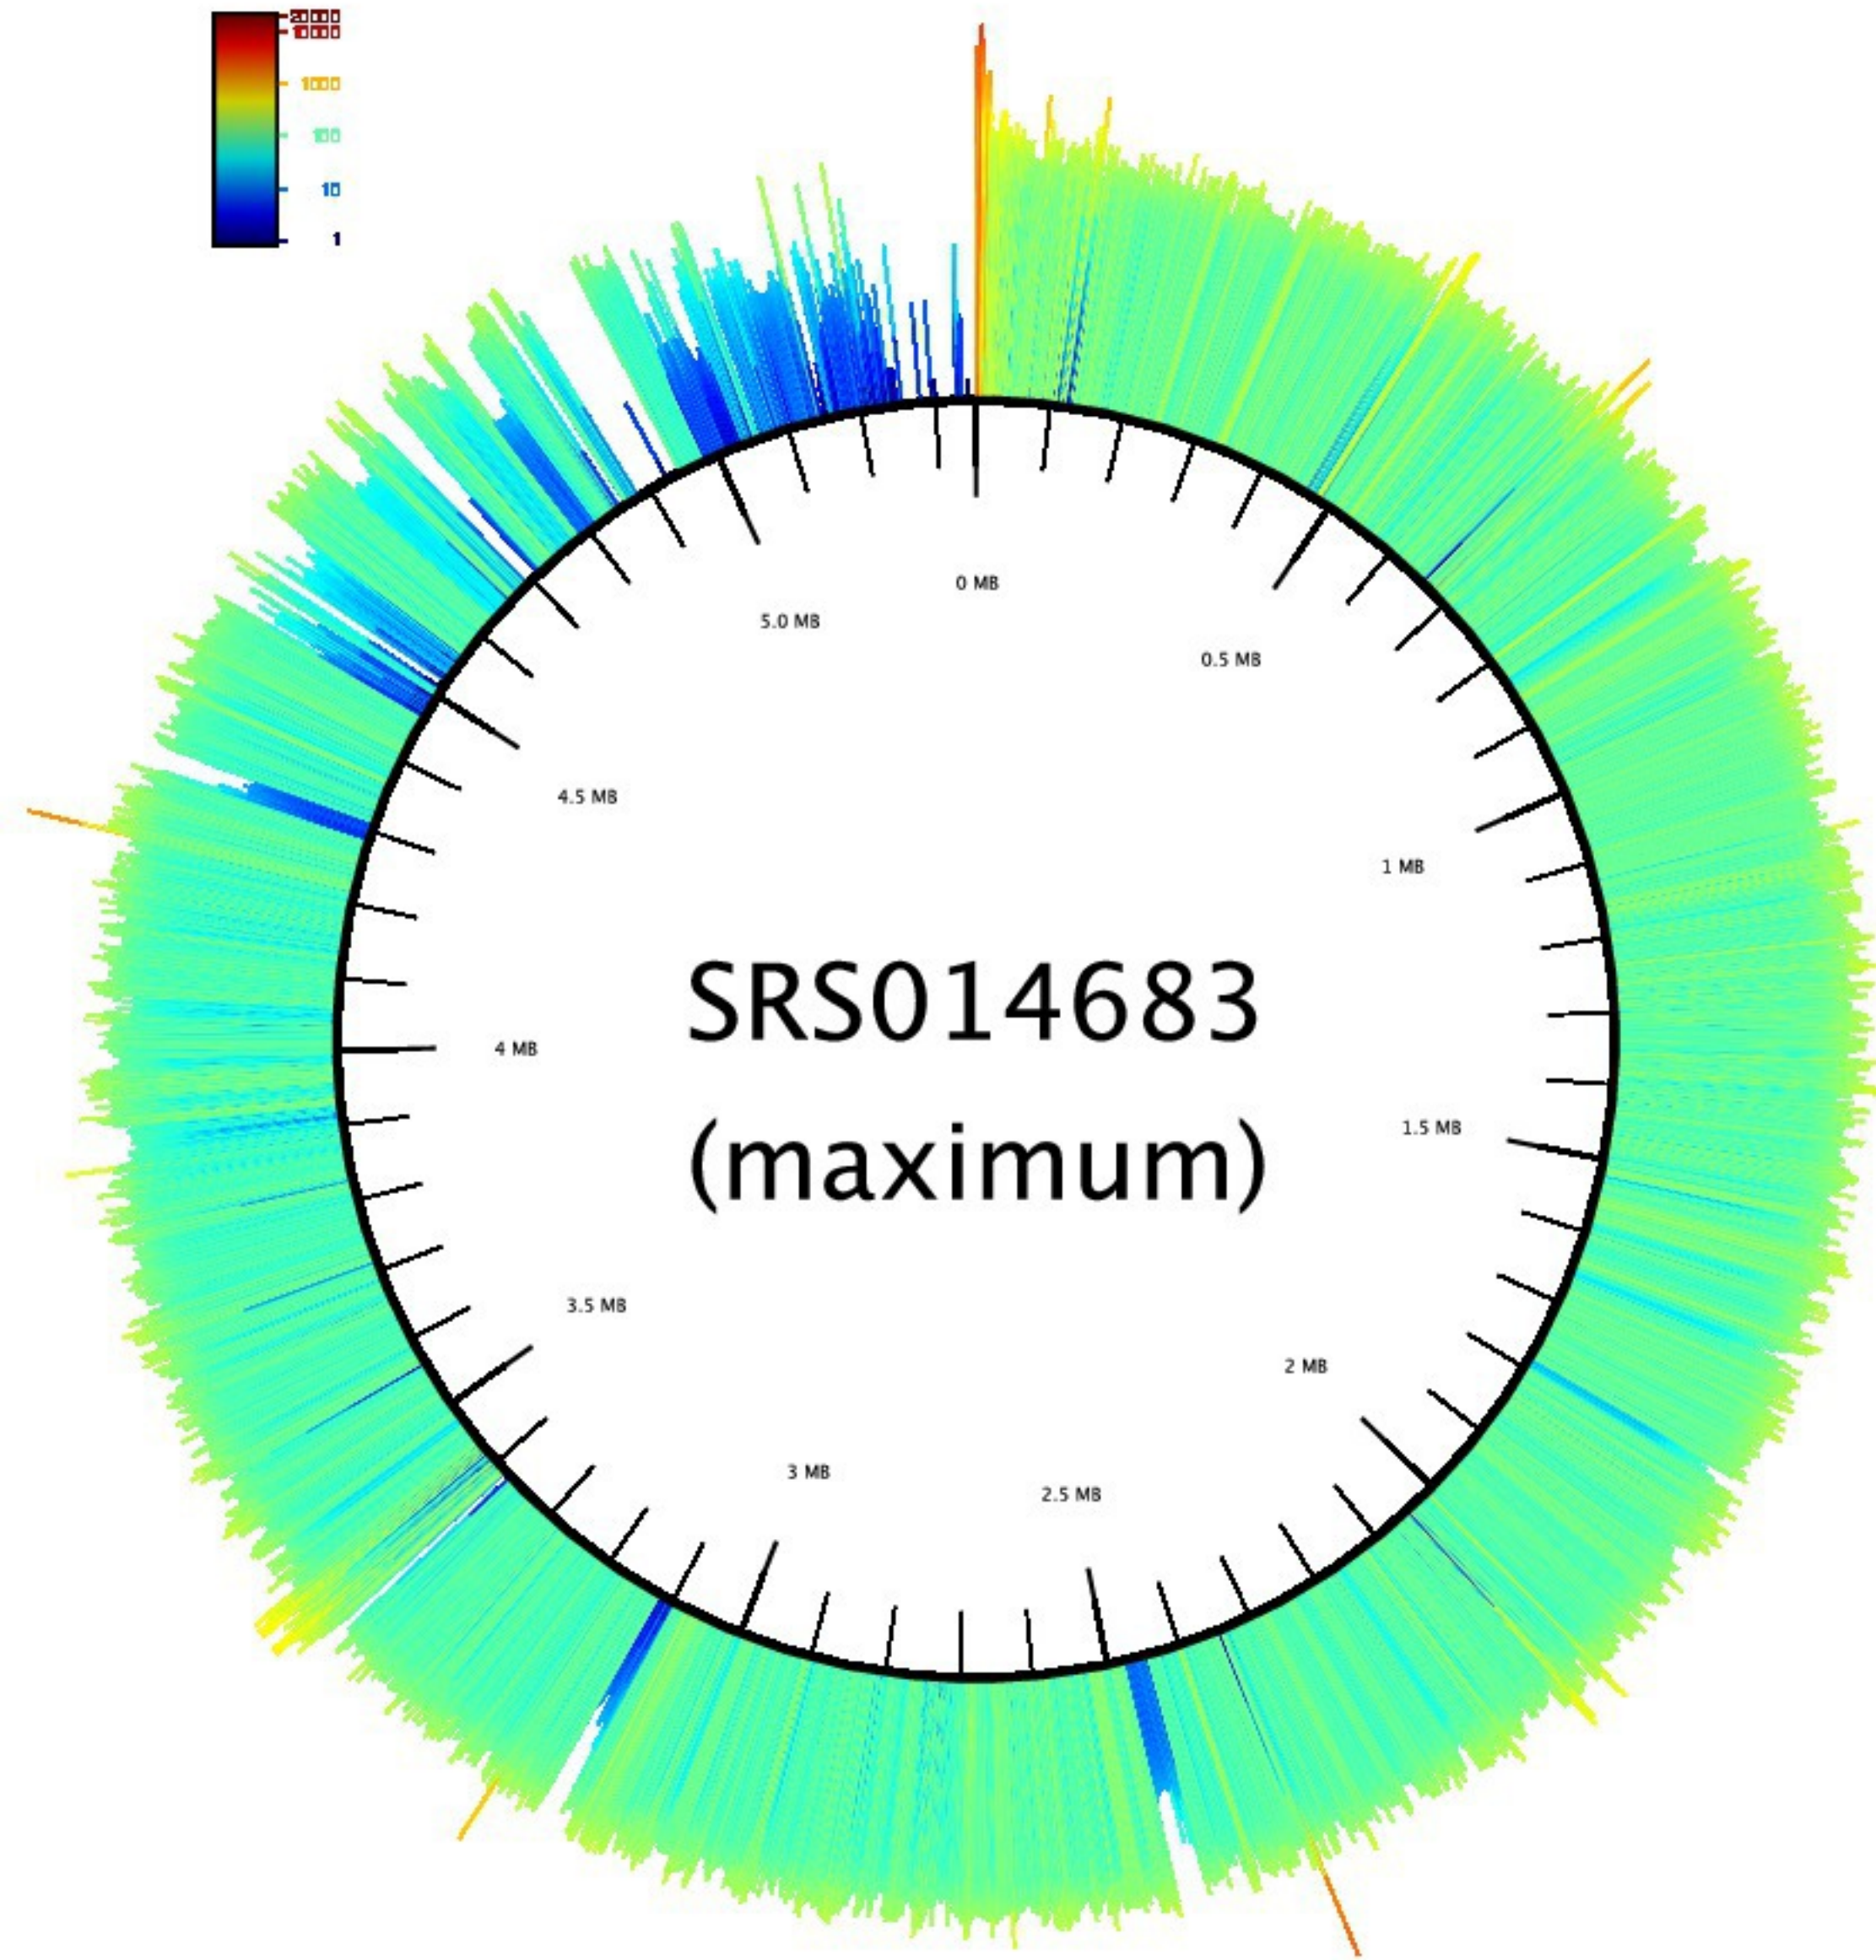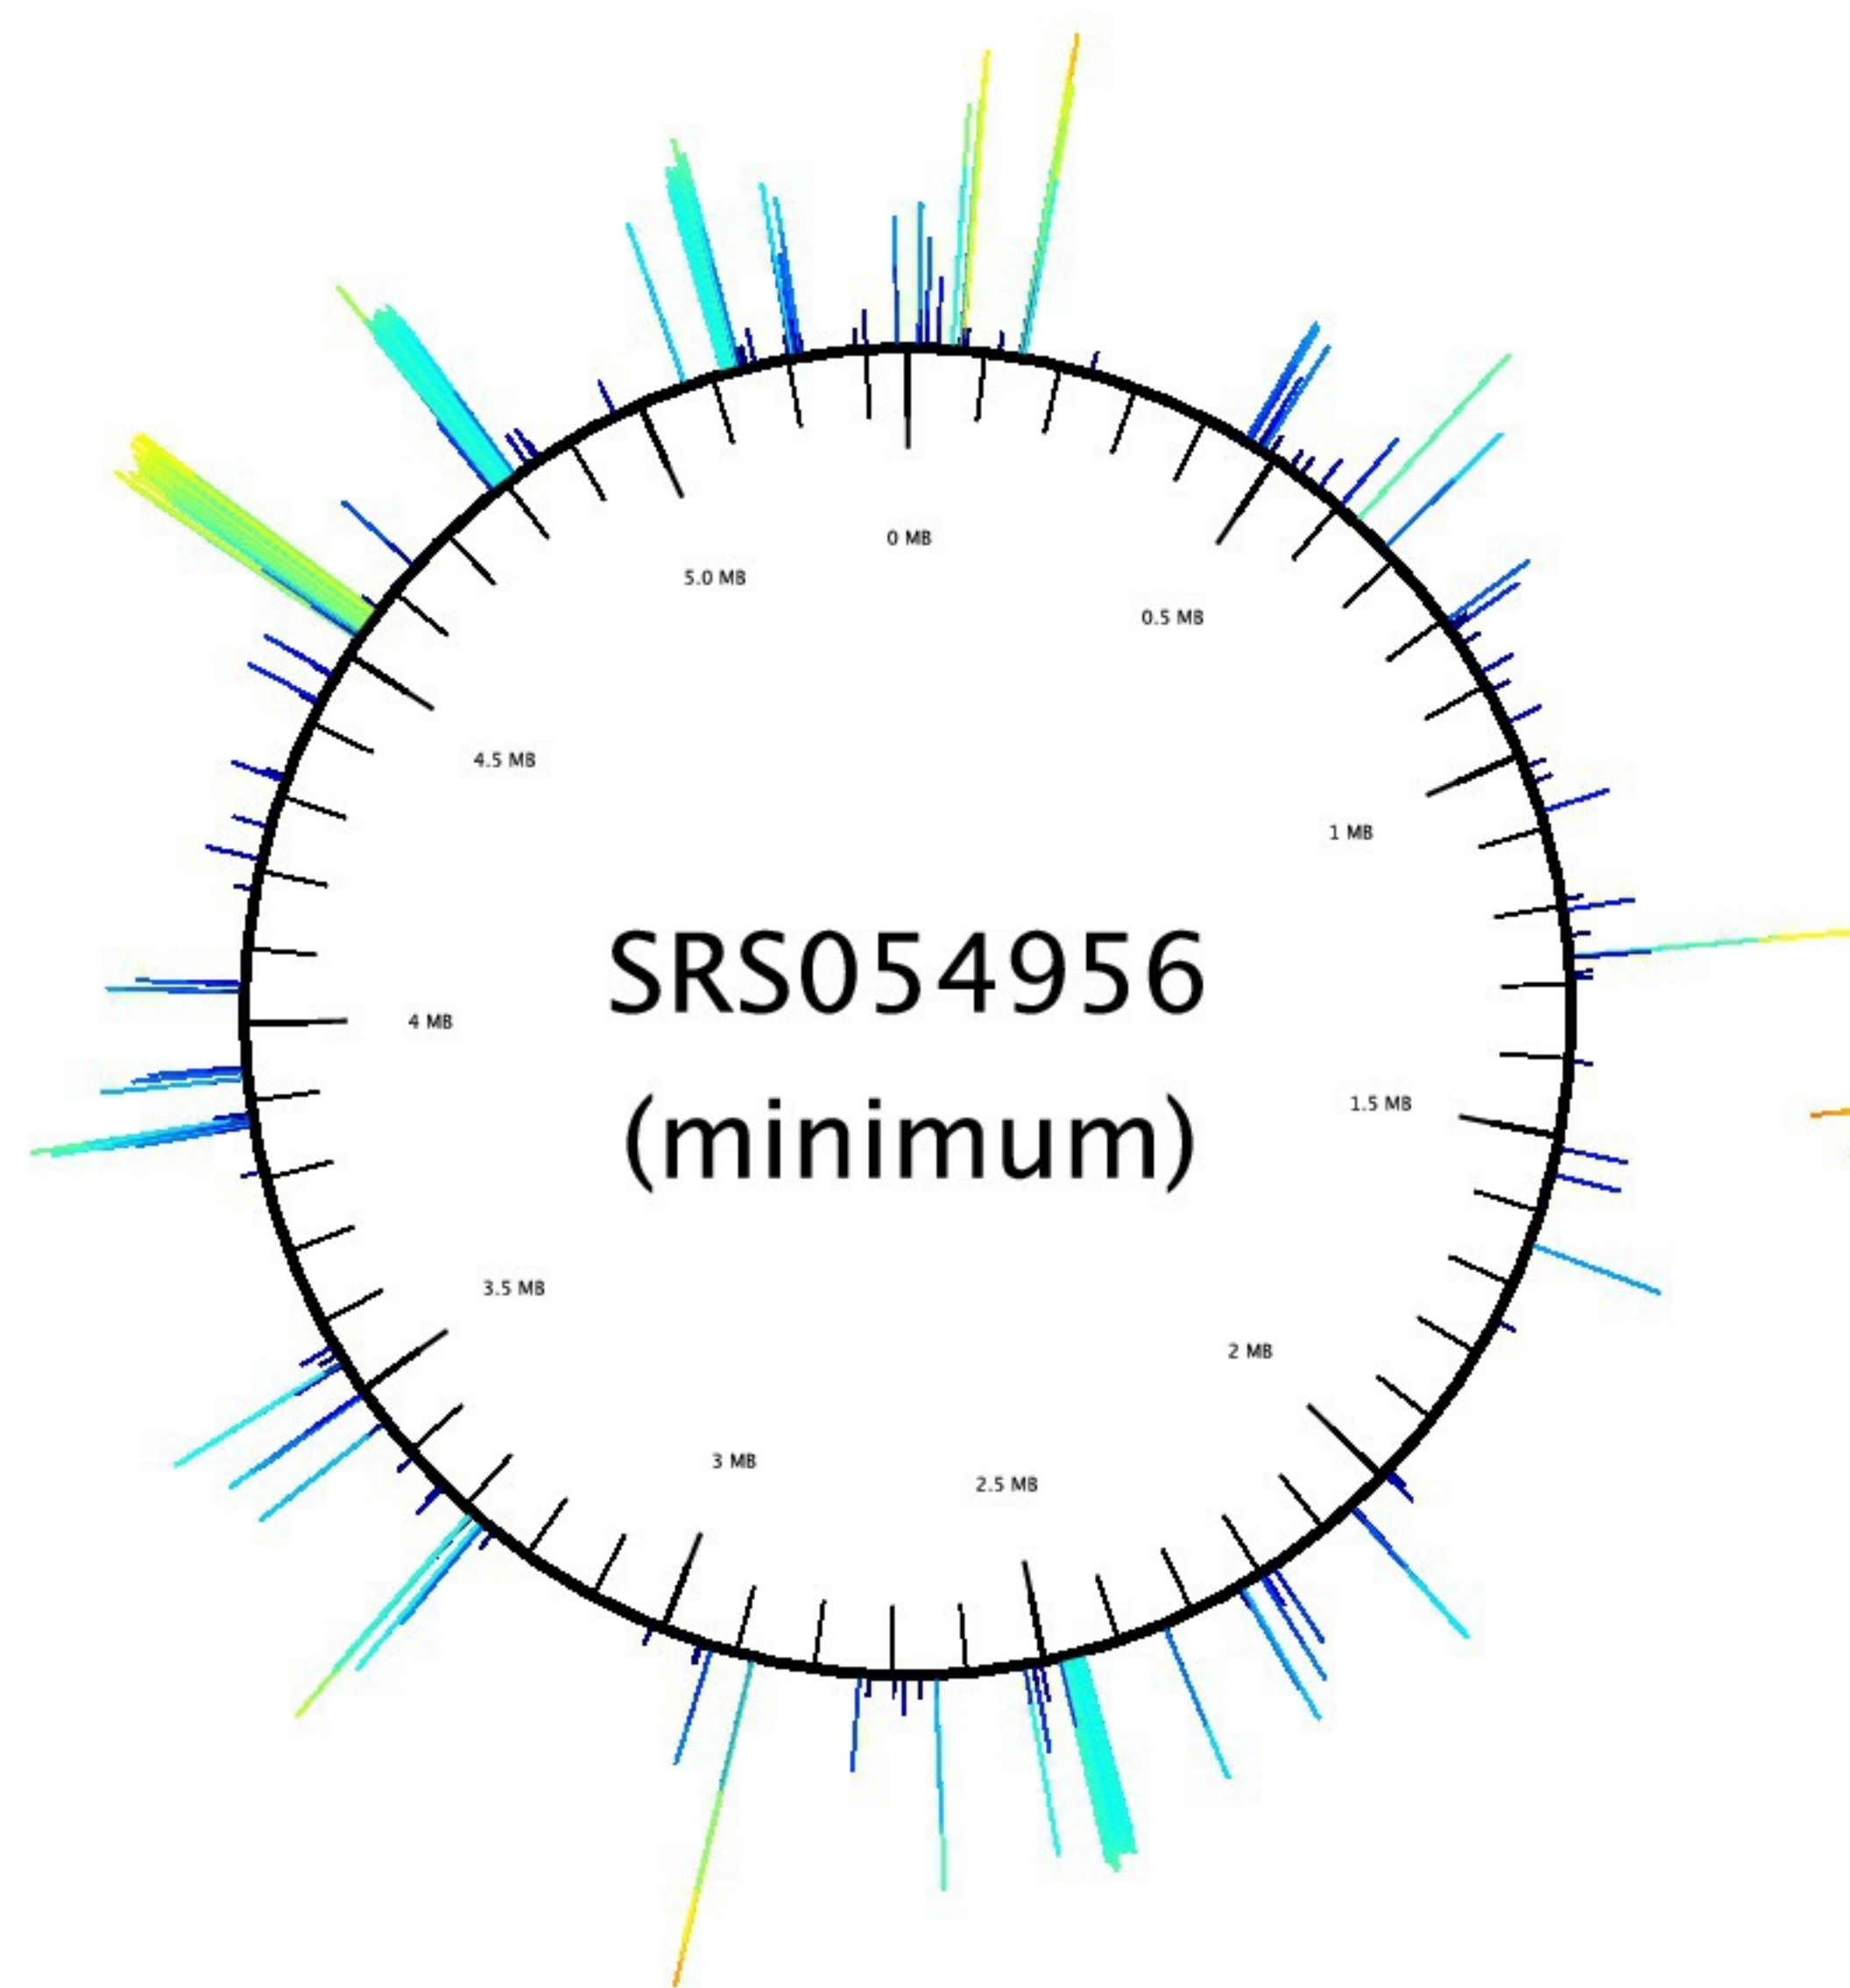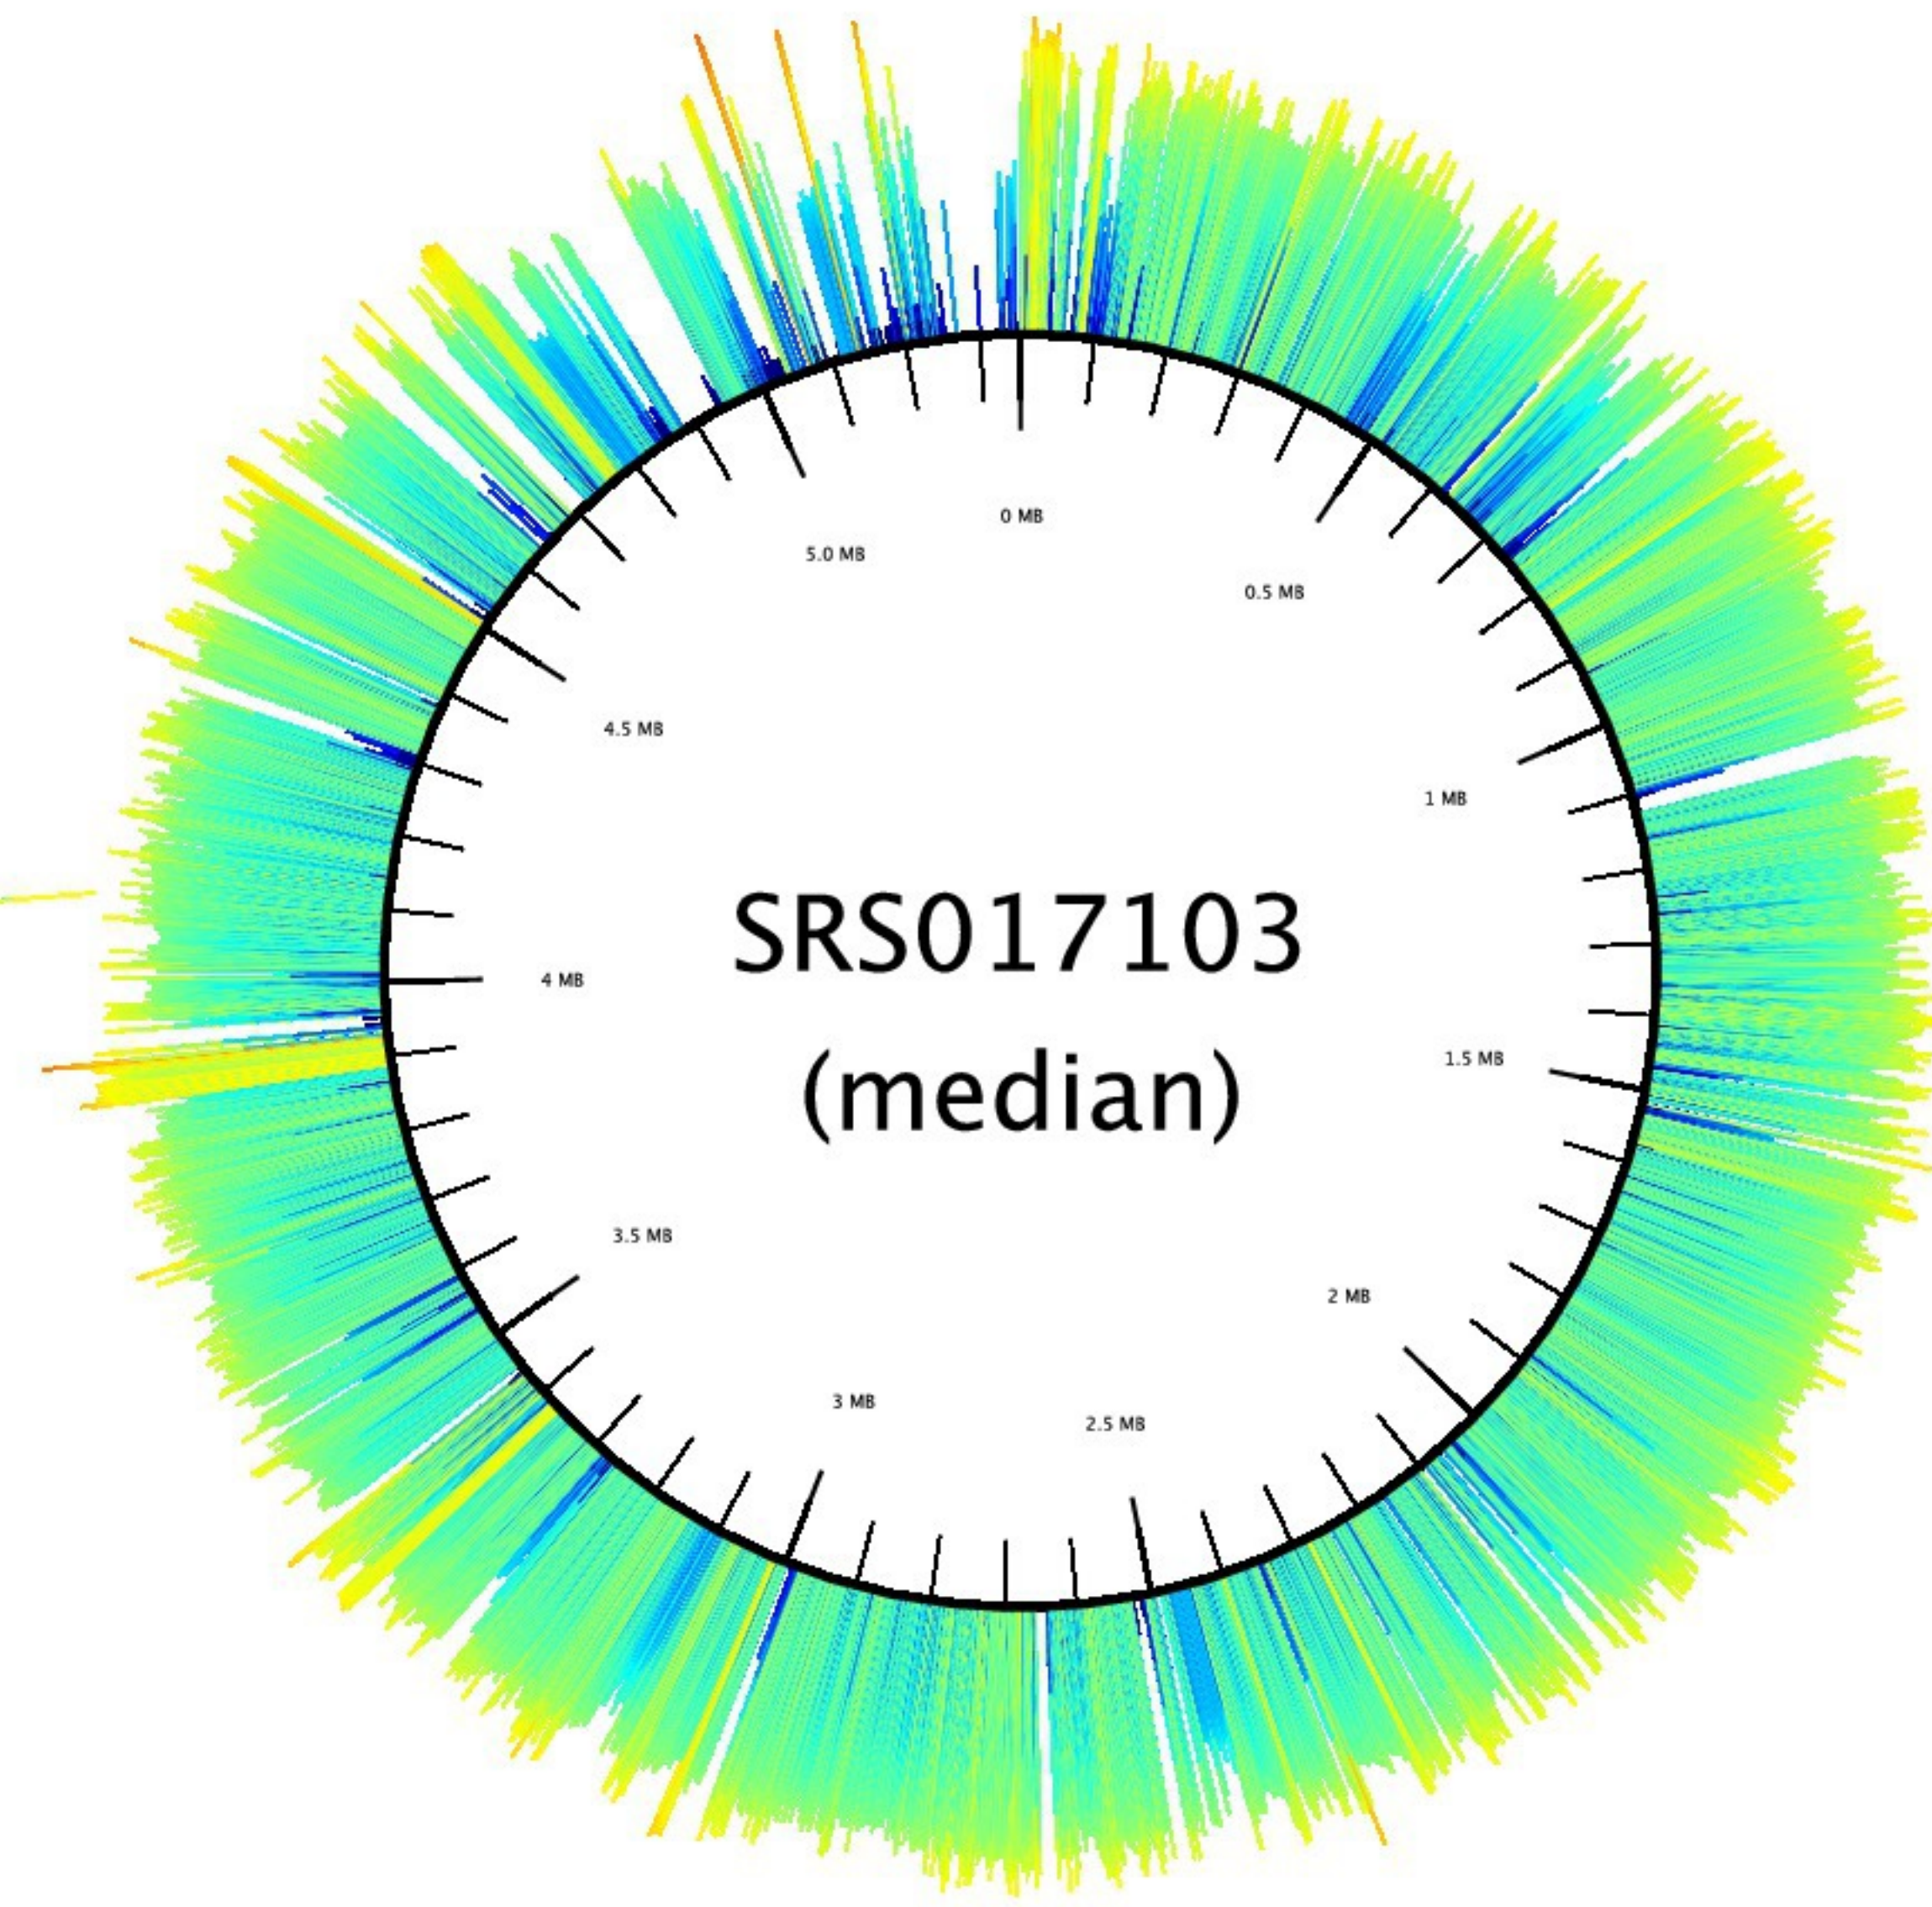

*Bacteroides stercoris* ATCC 43183

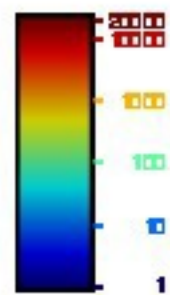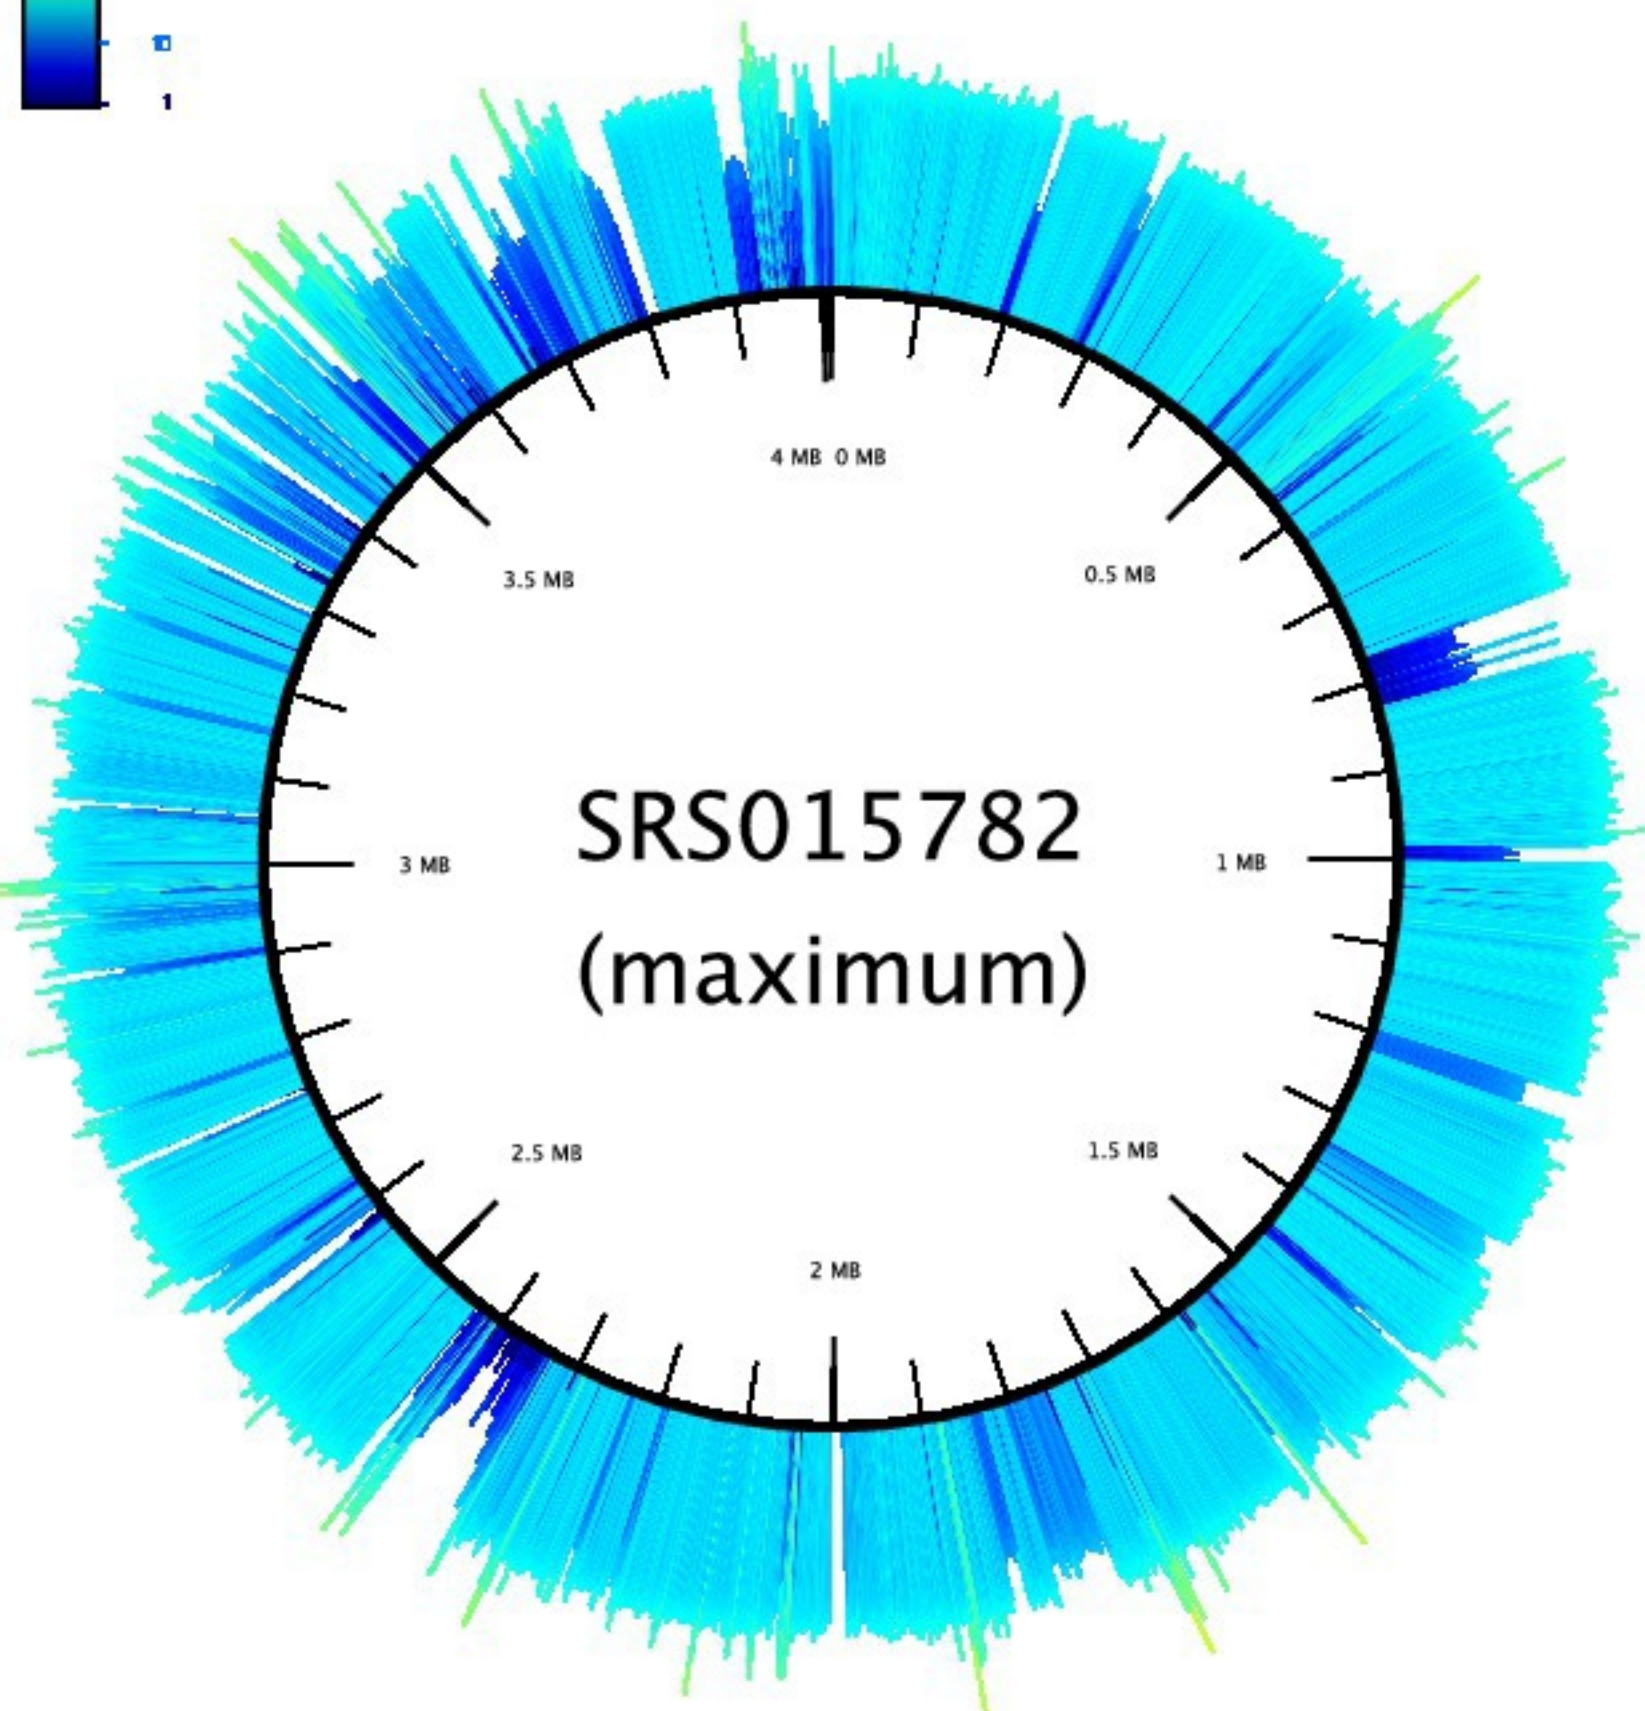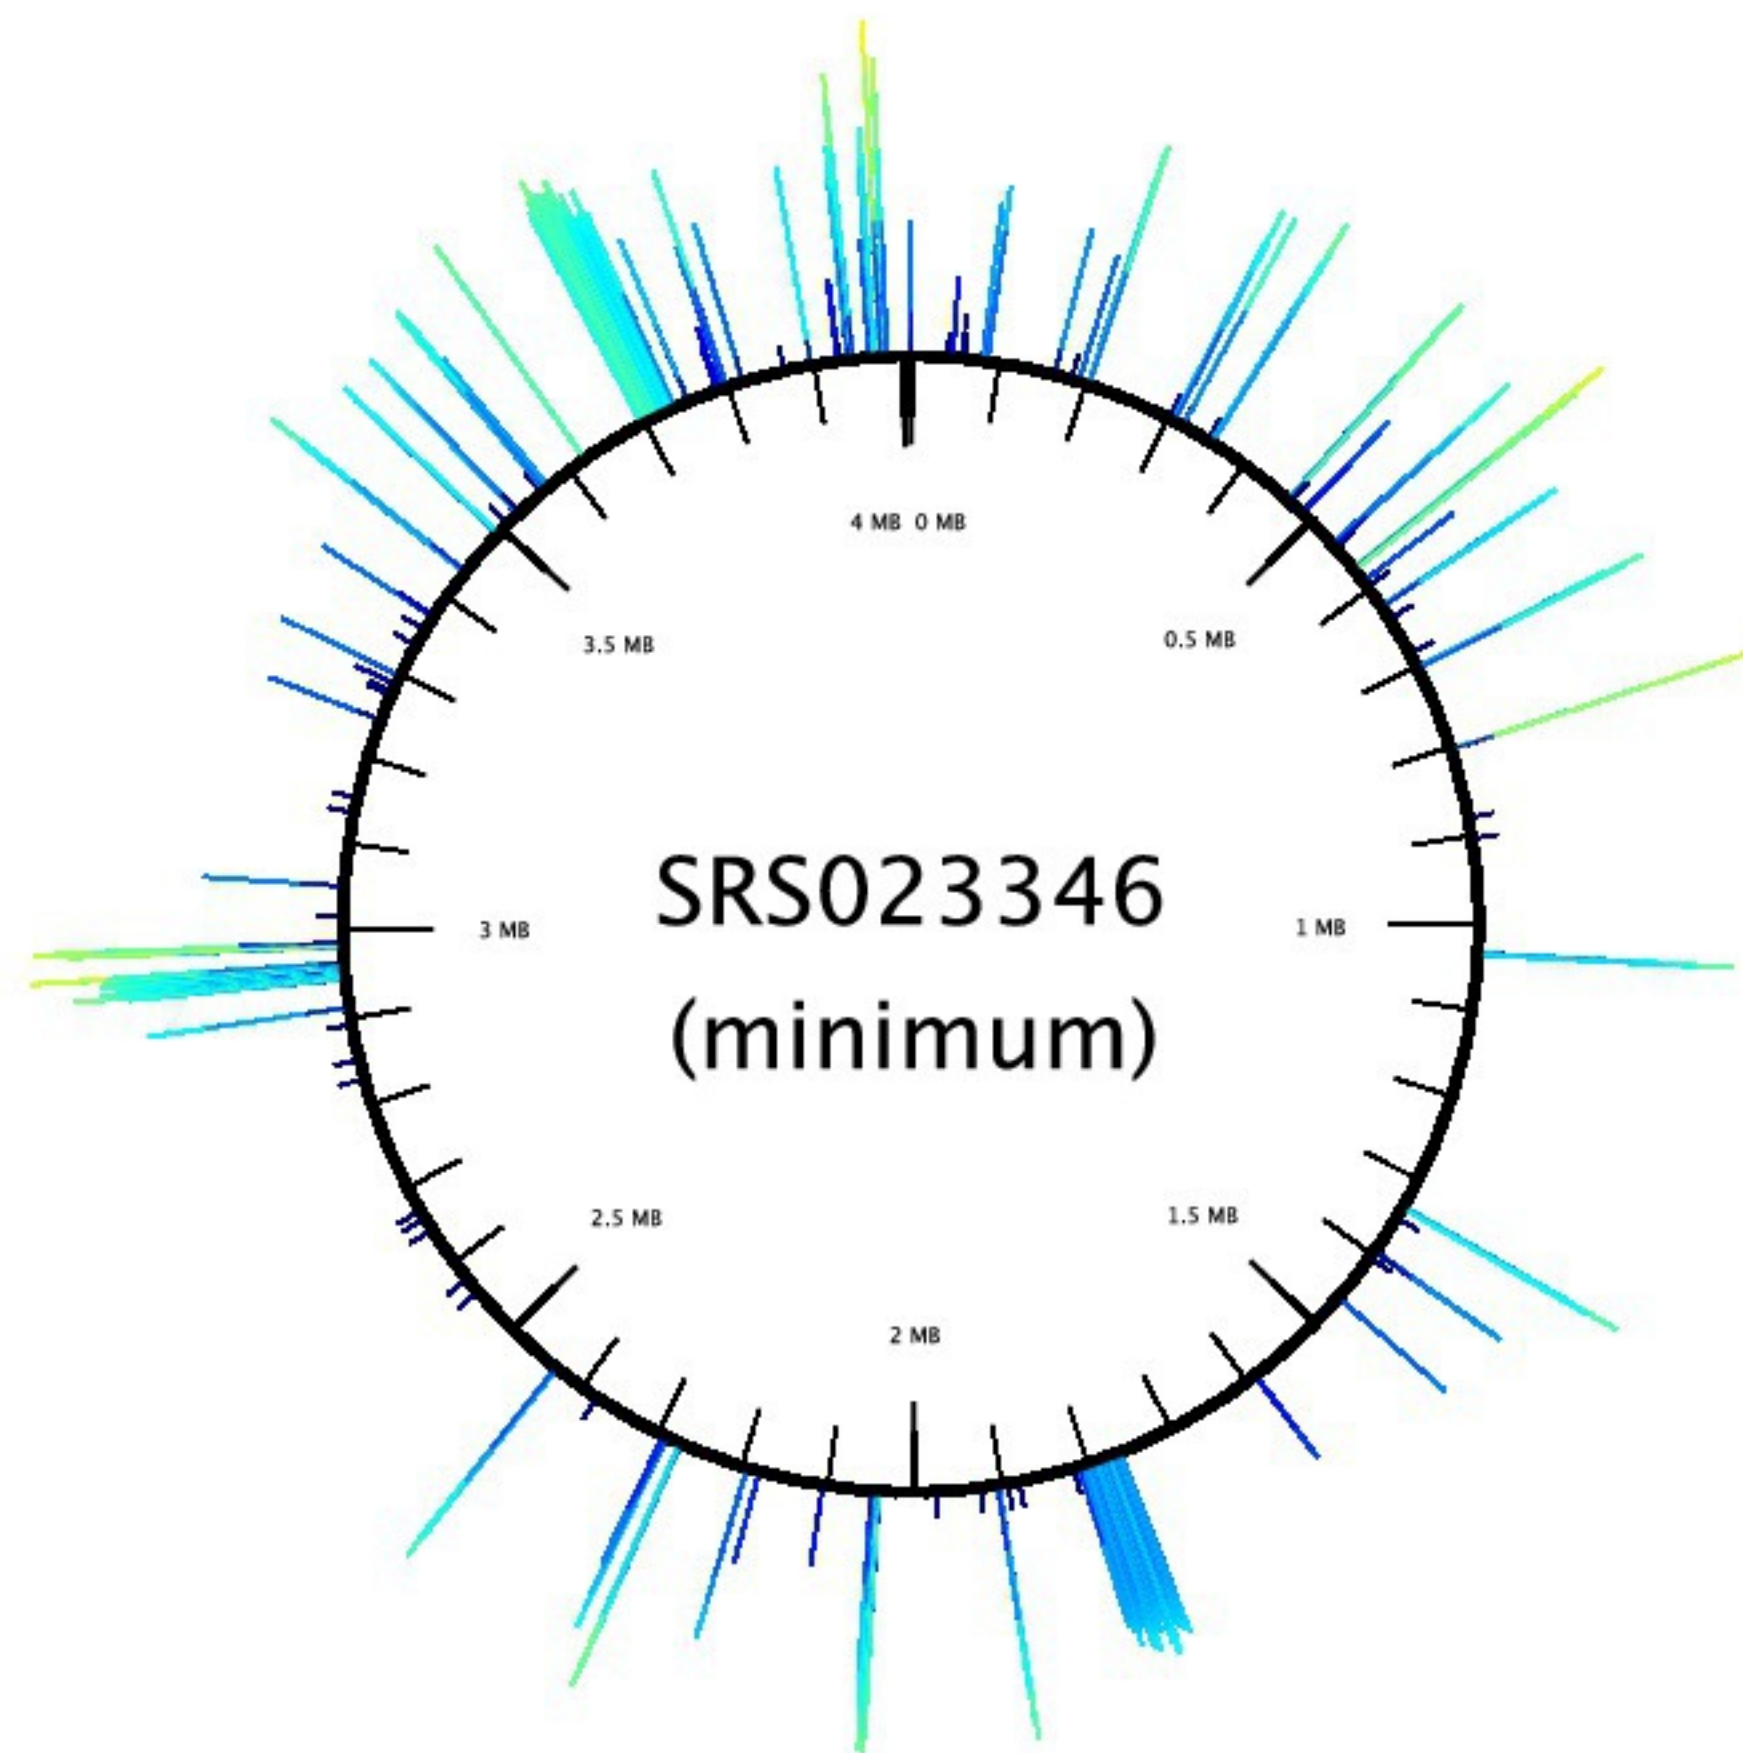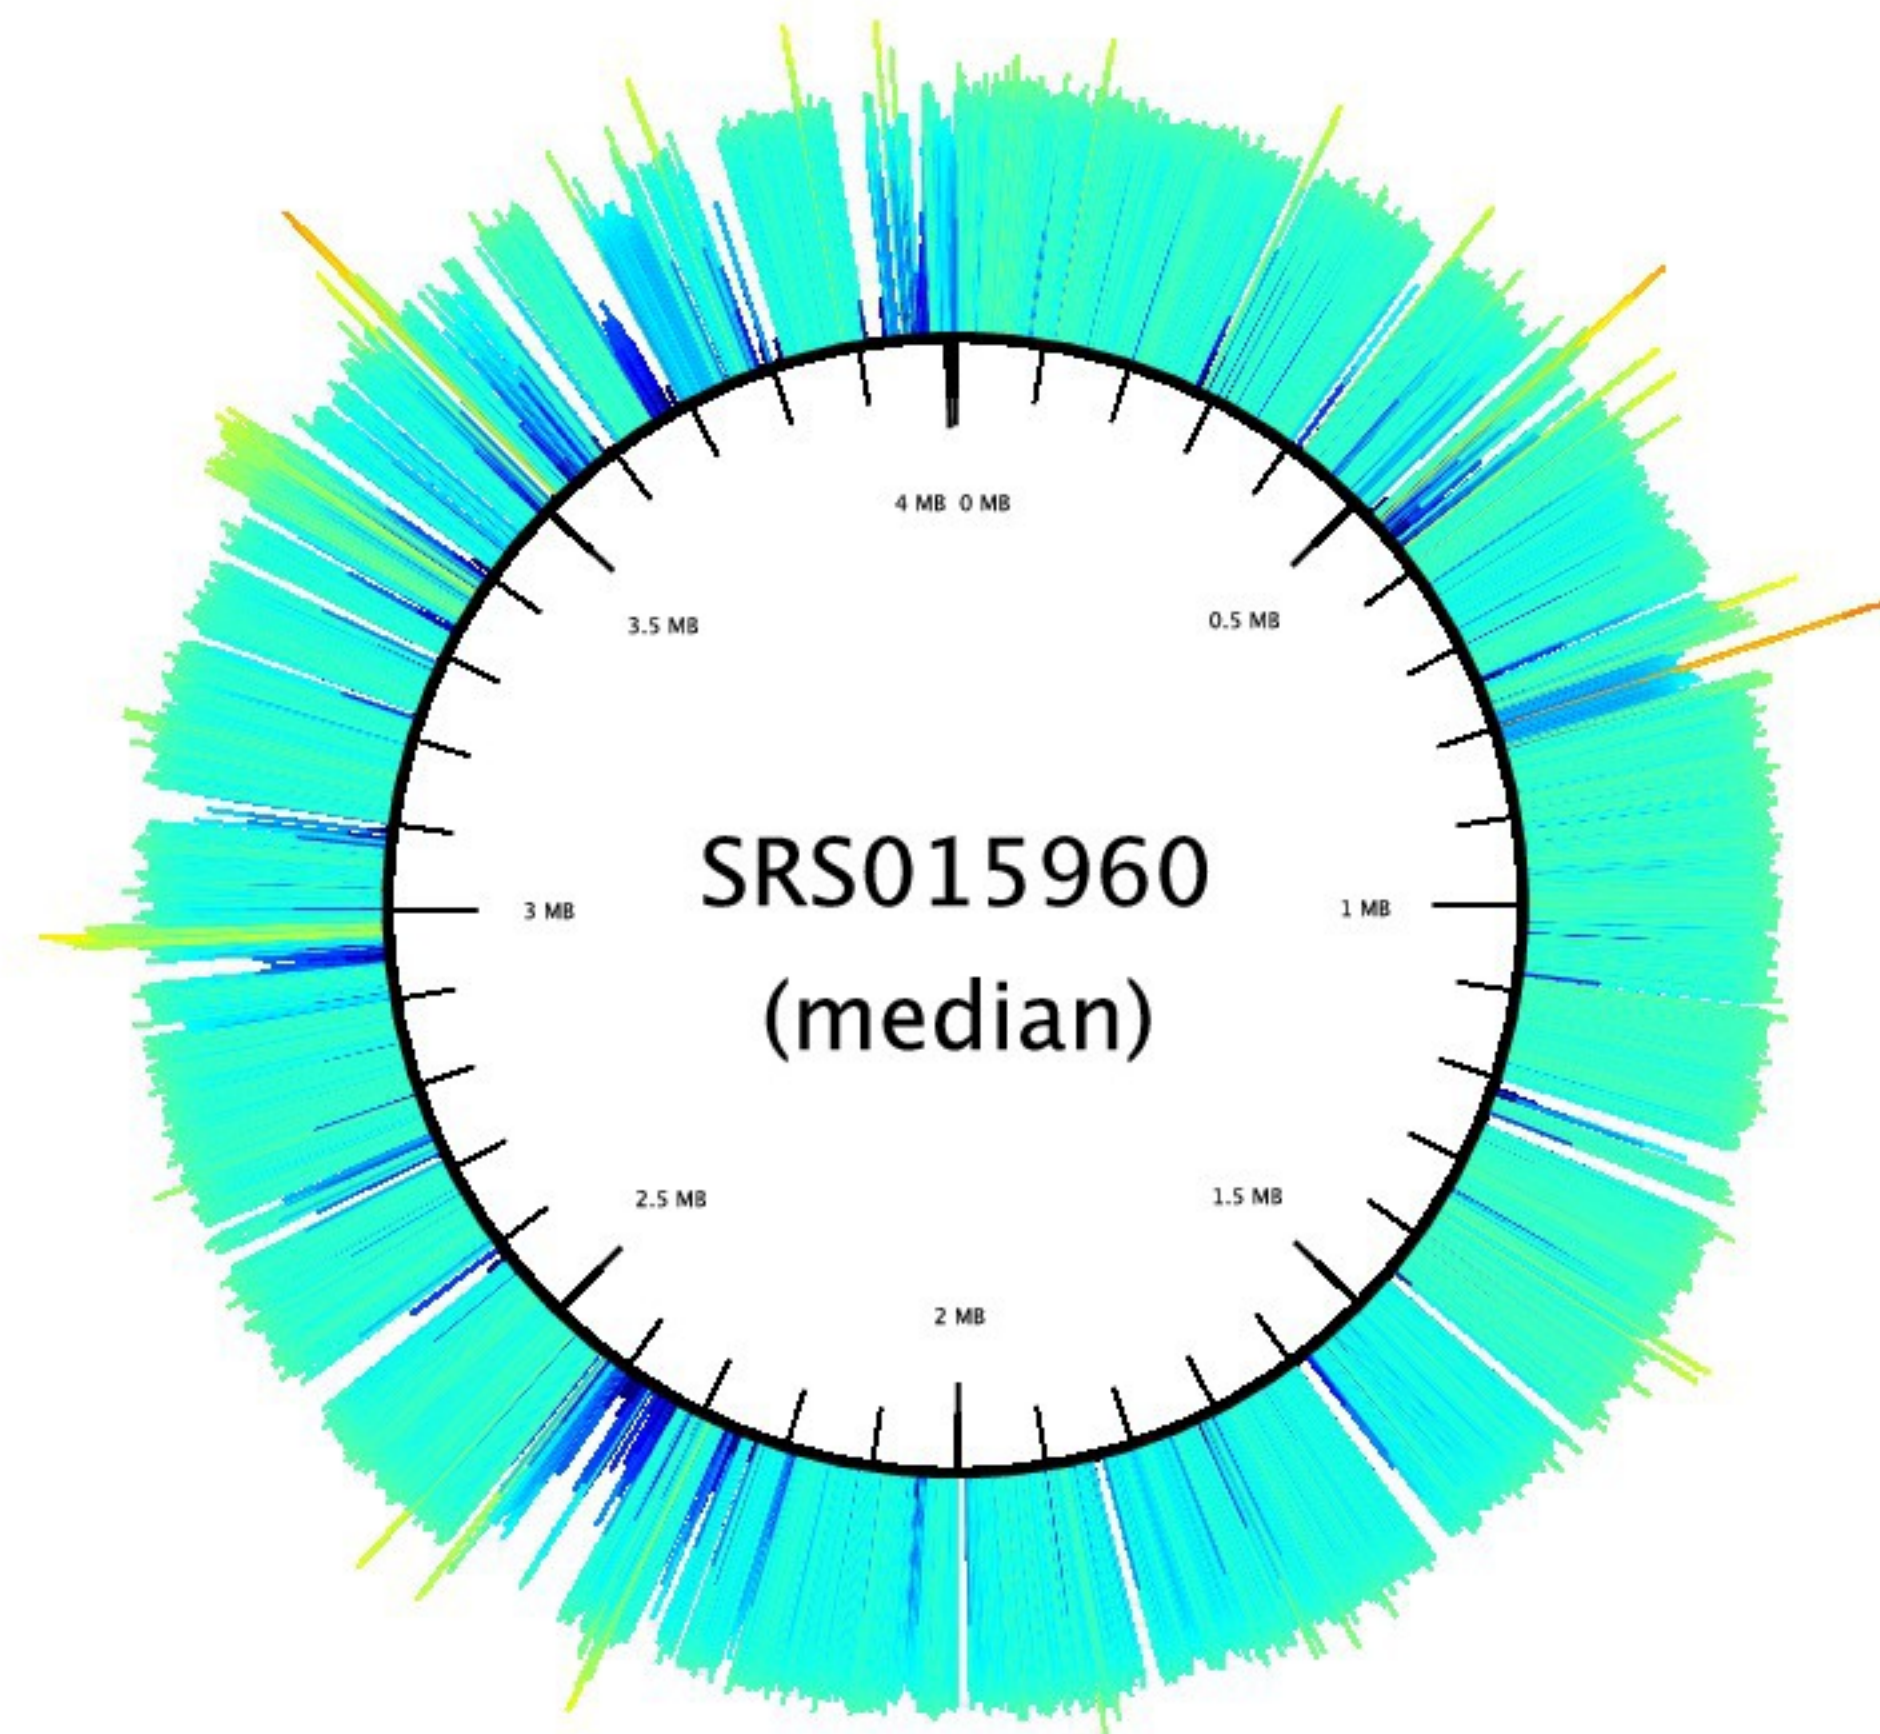

*Bacteroides thetaiotaomicron* VPI-5482

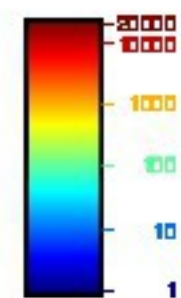

SRS052697  
(maximum)

SRS015190  
(minimum)

SRS015578  
(median)

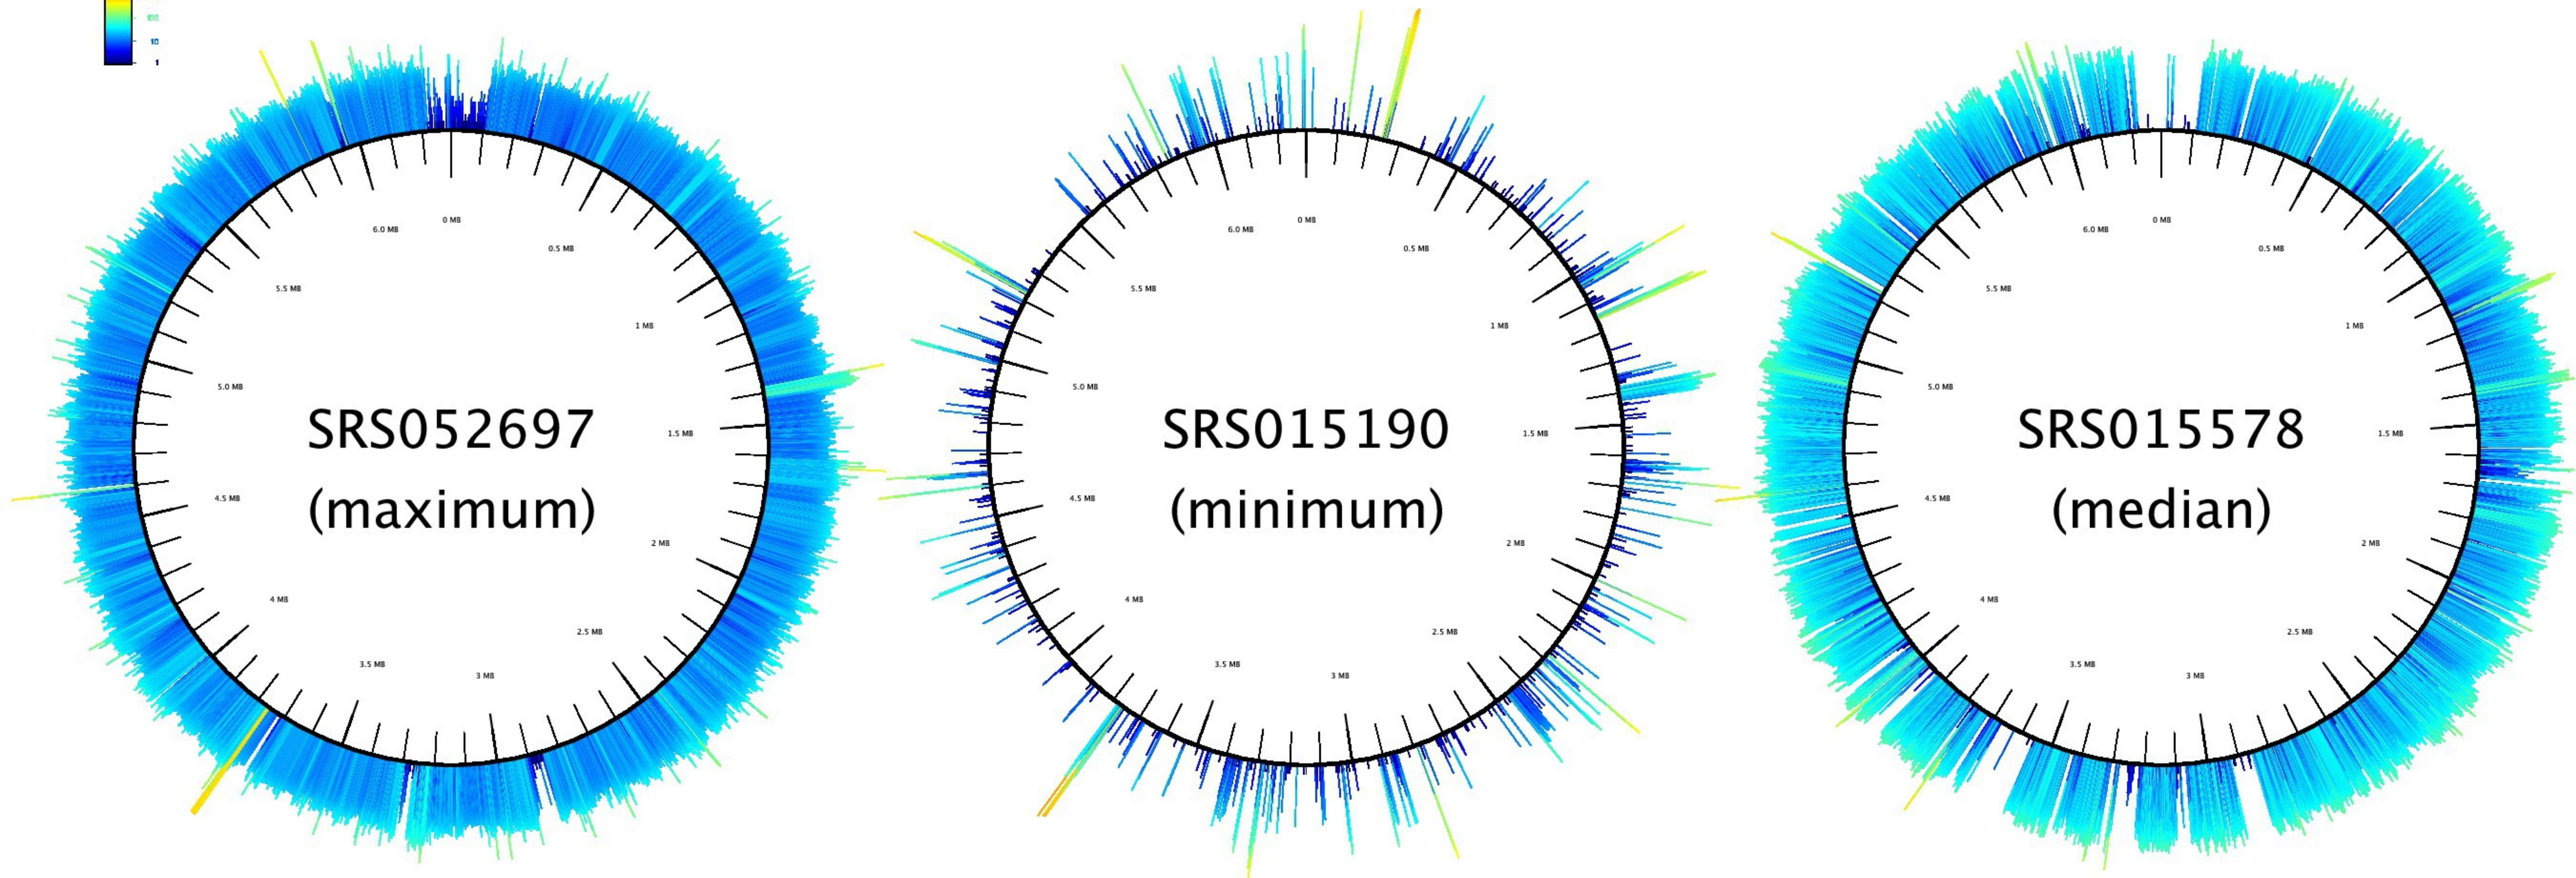

*Bacteroides vulgatus* ATCC 8482

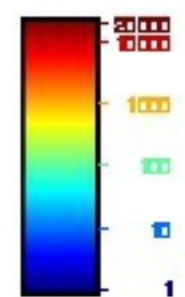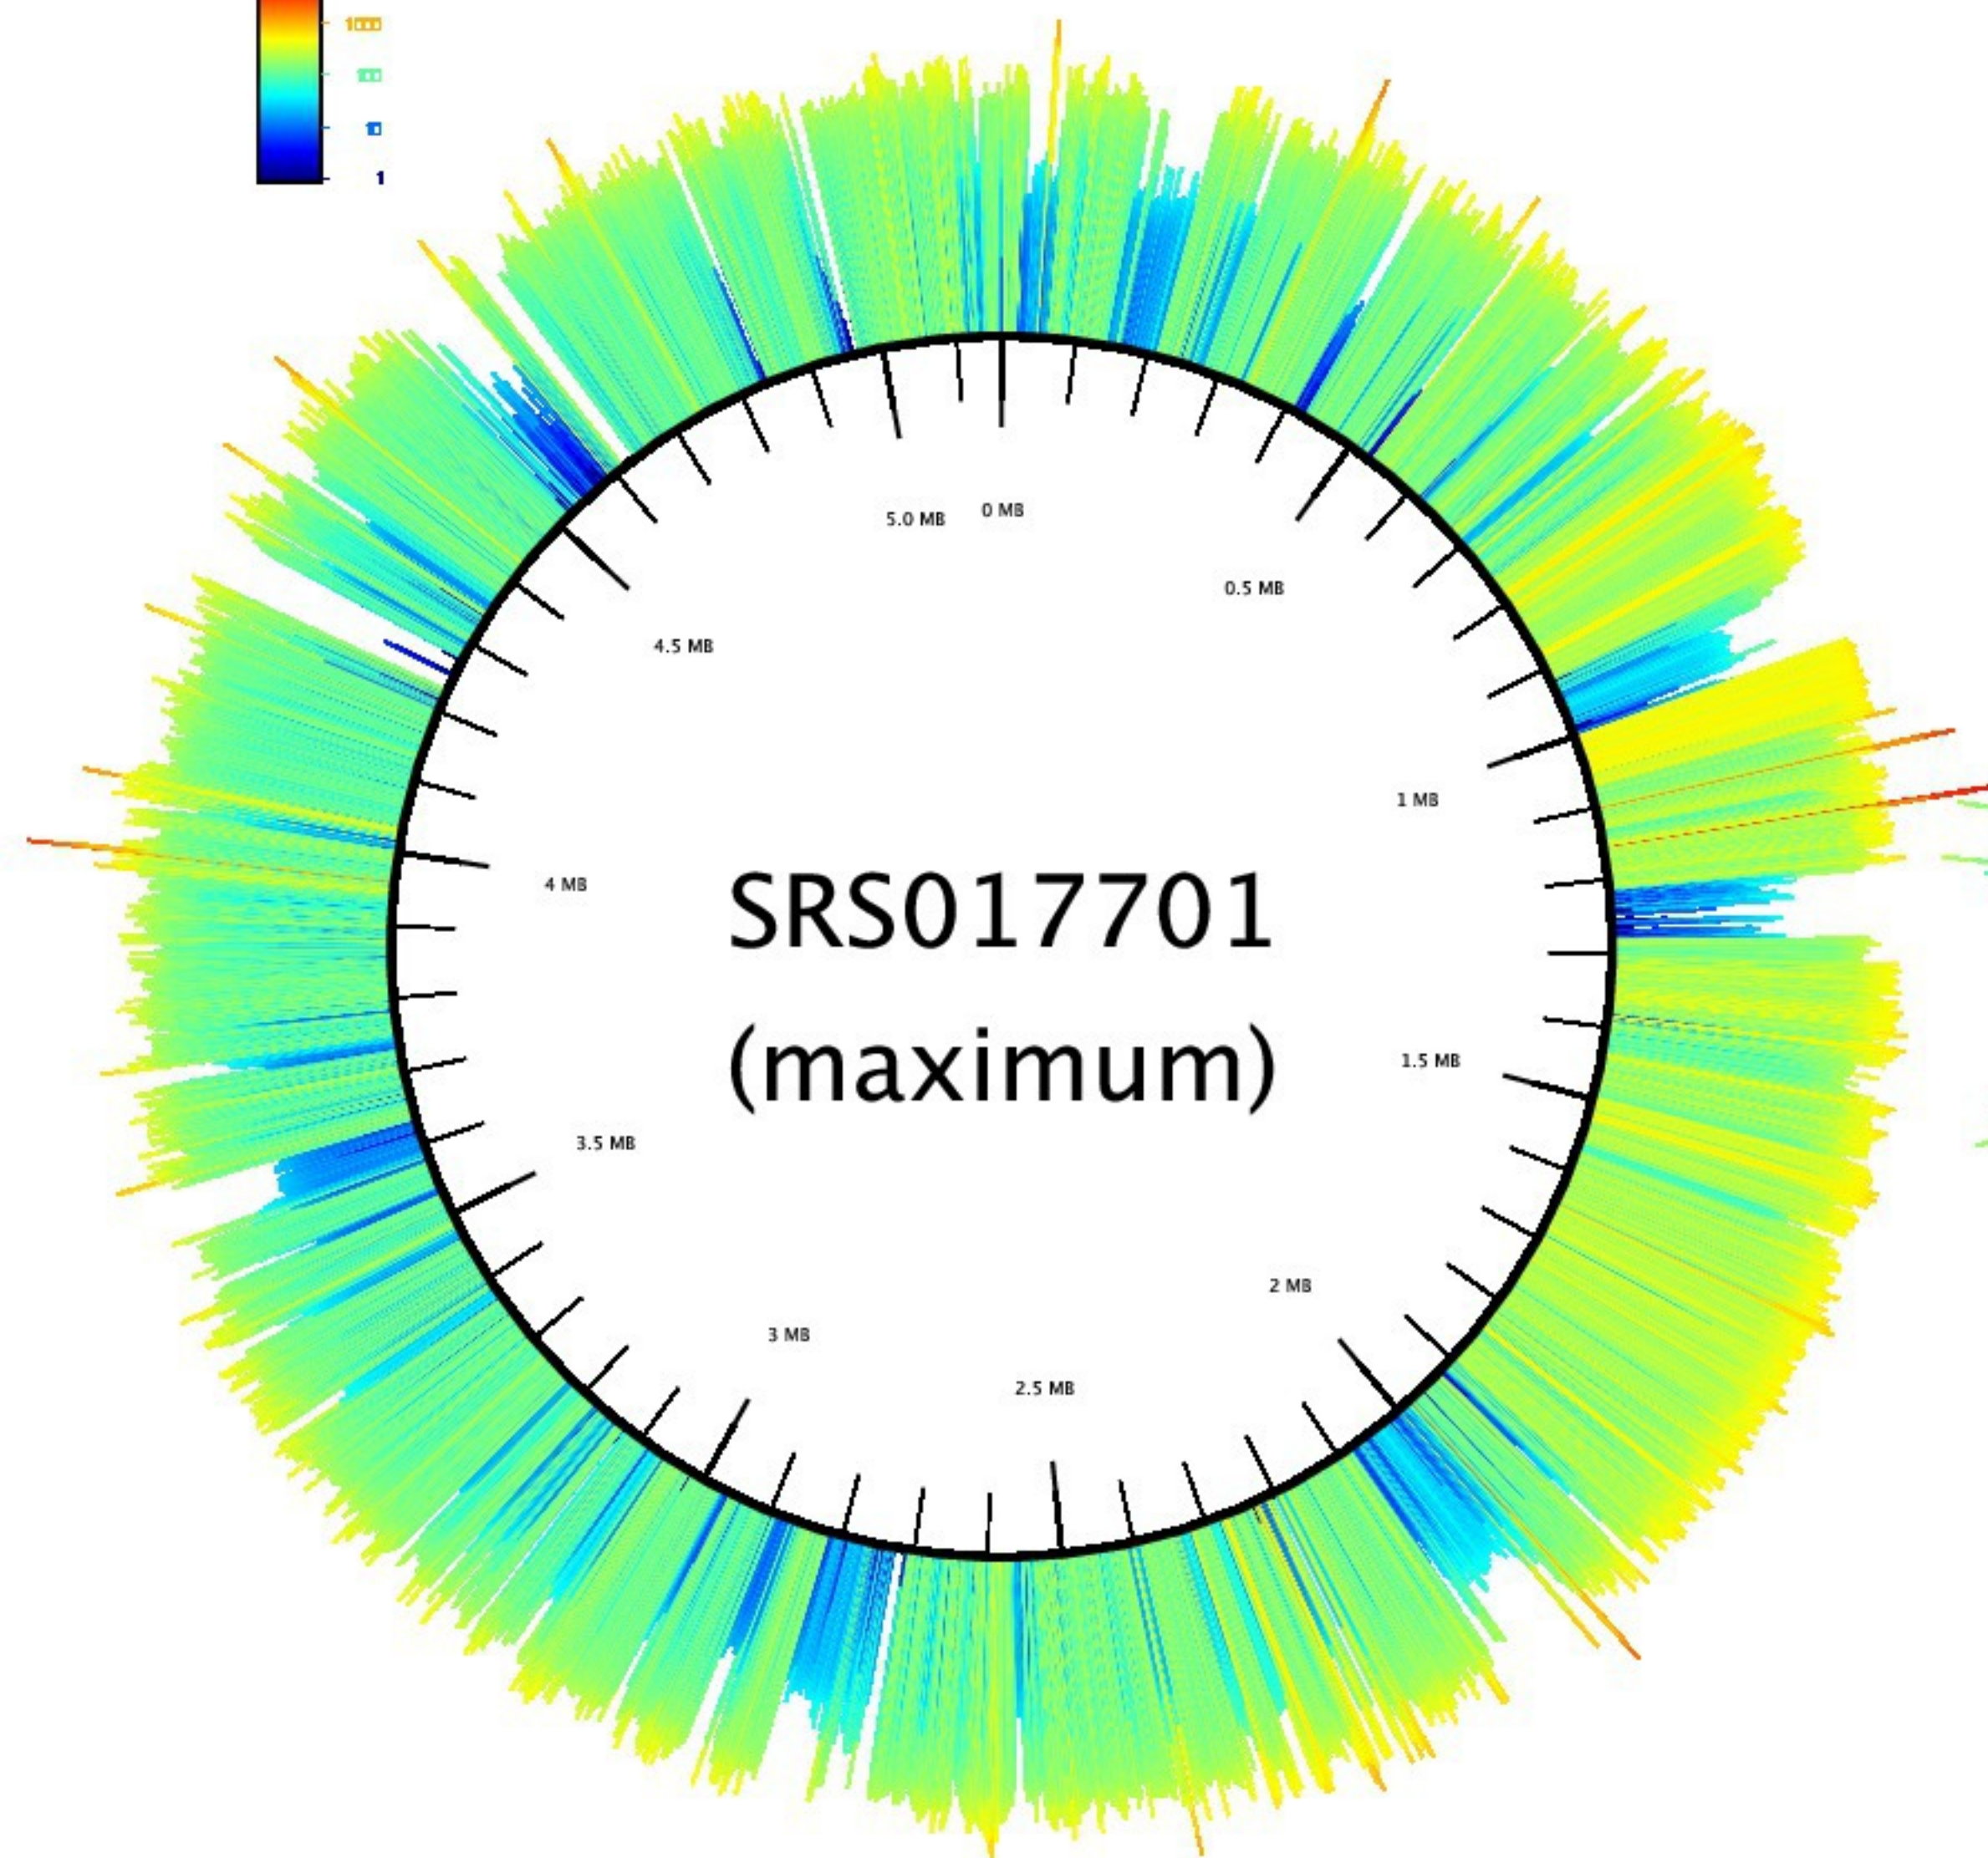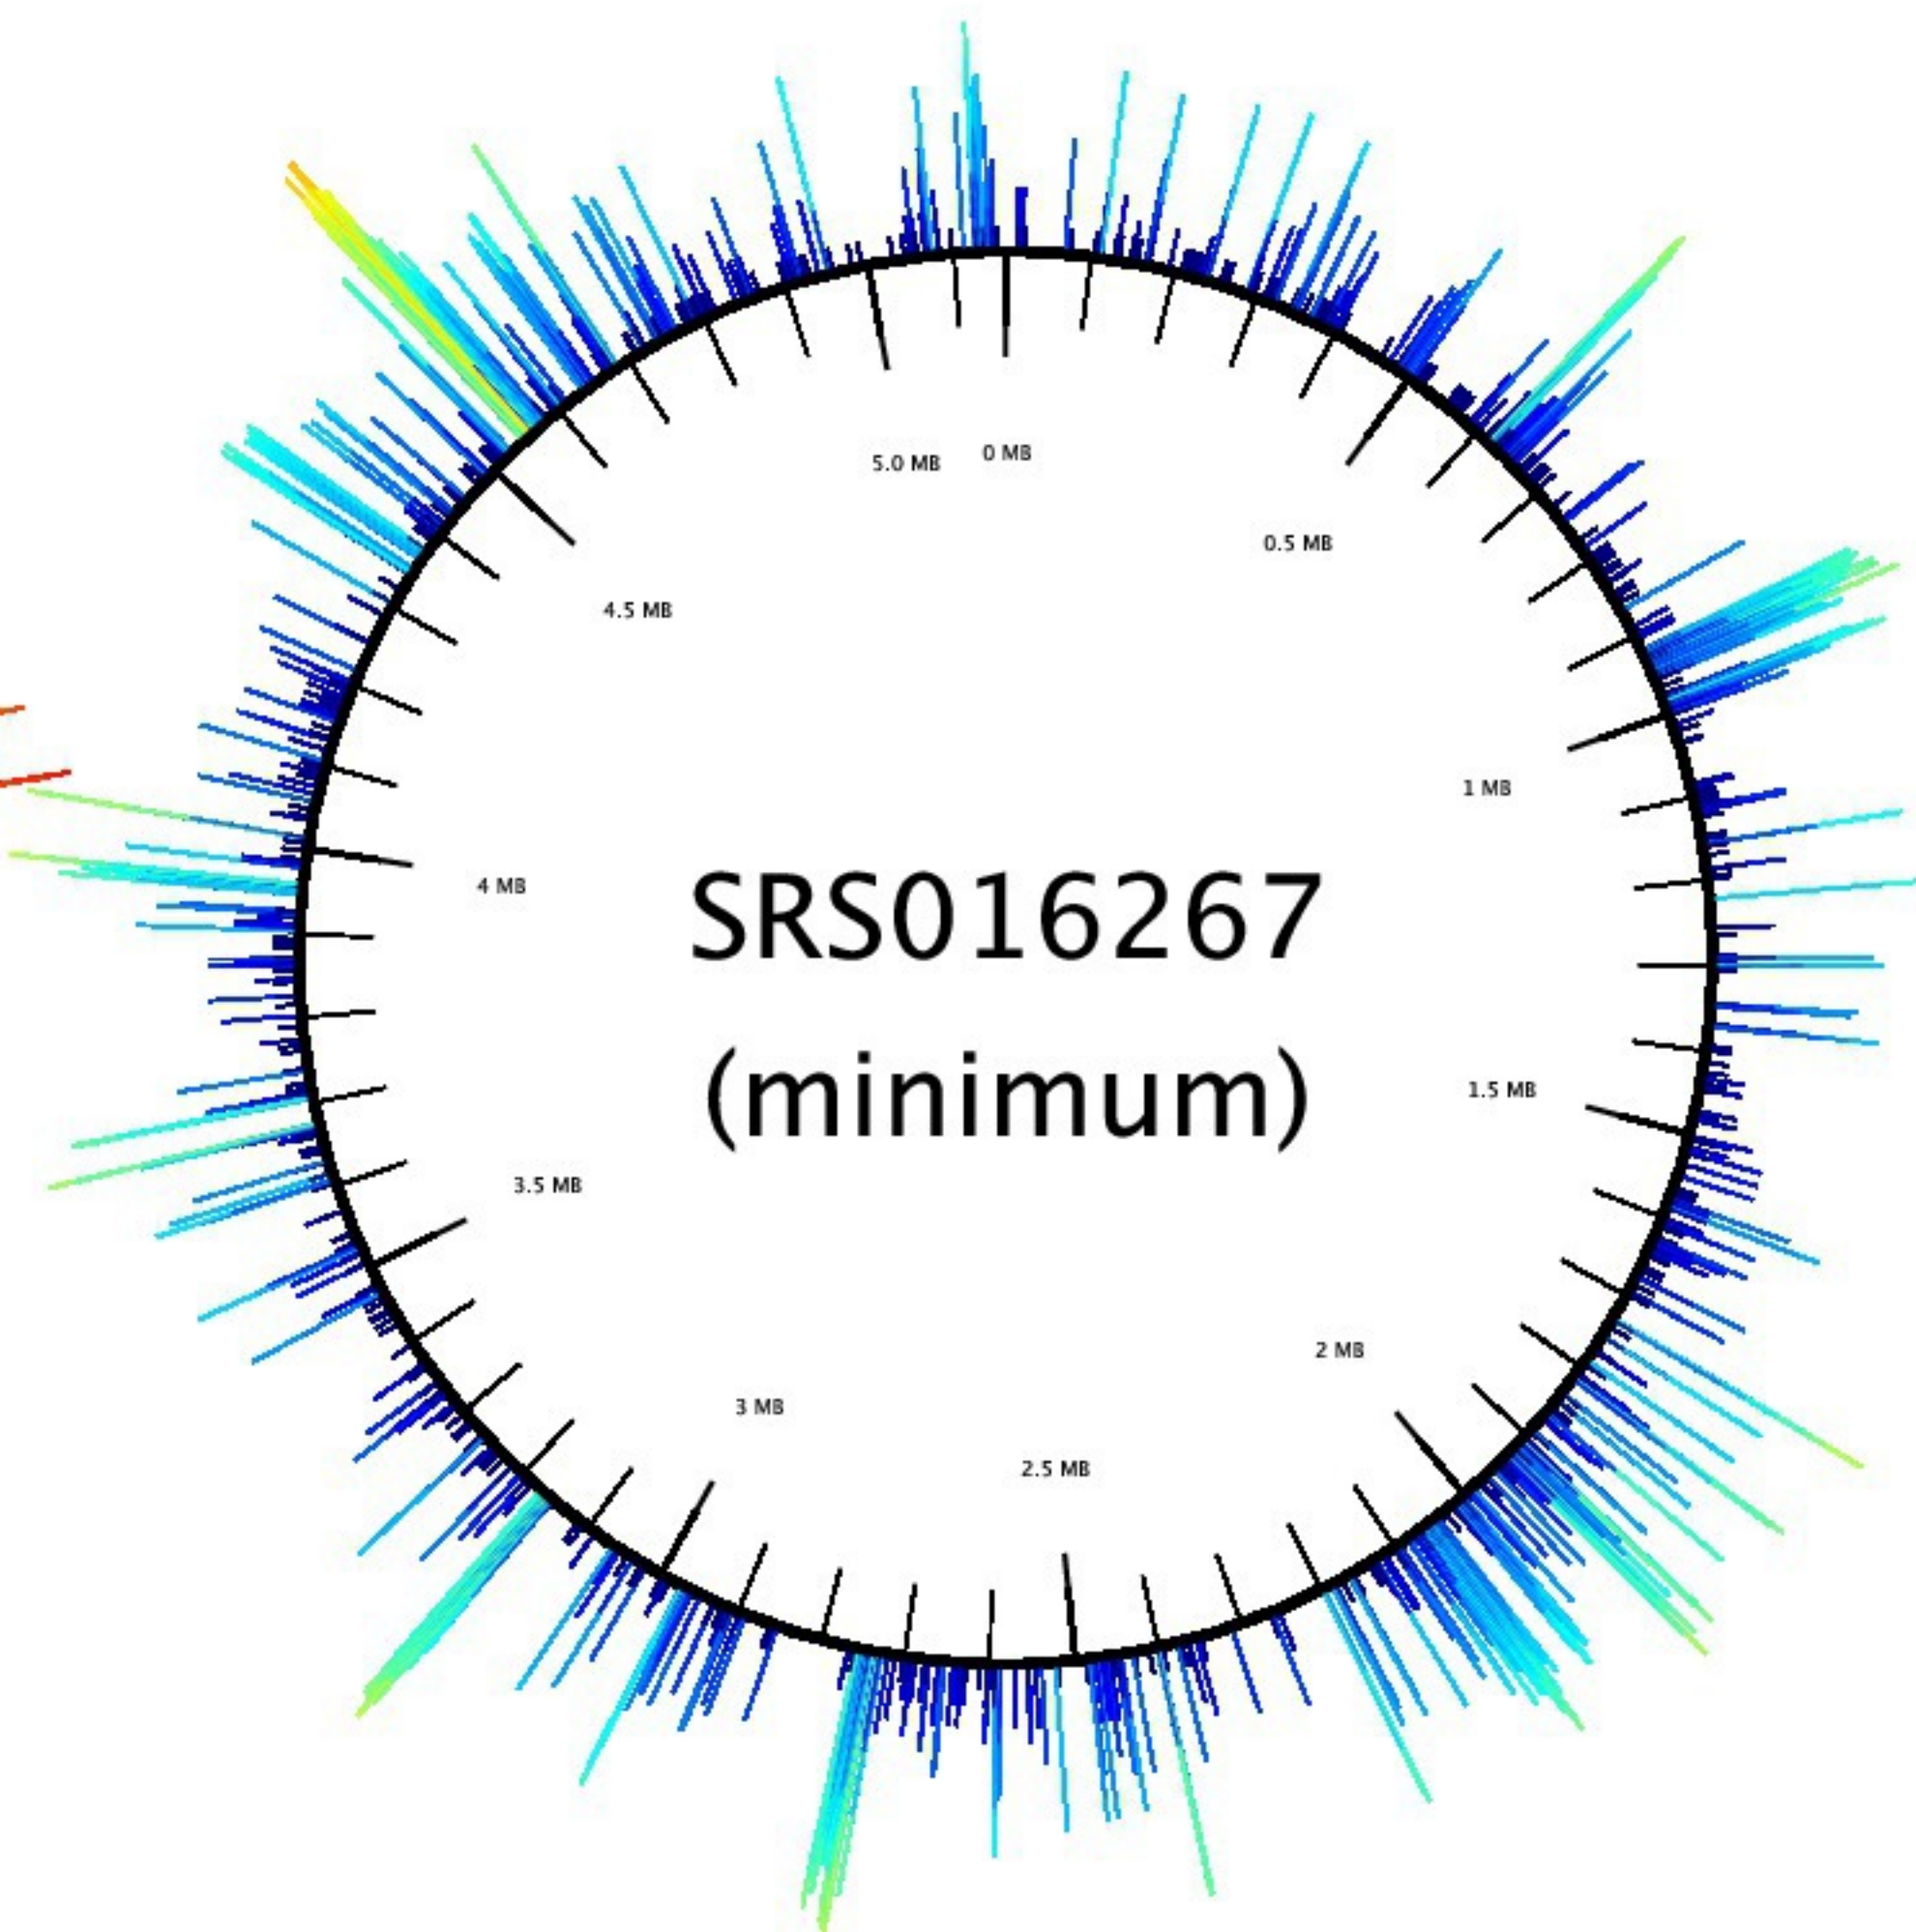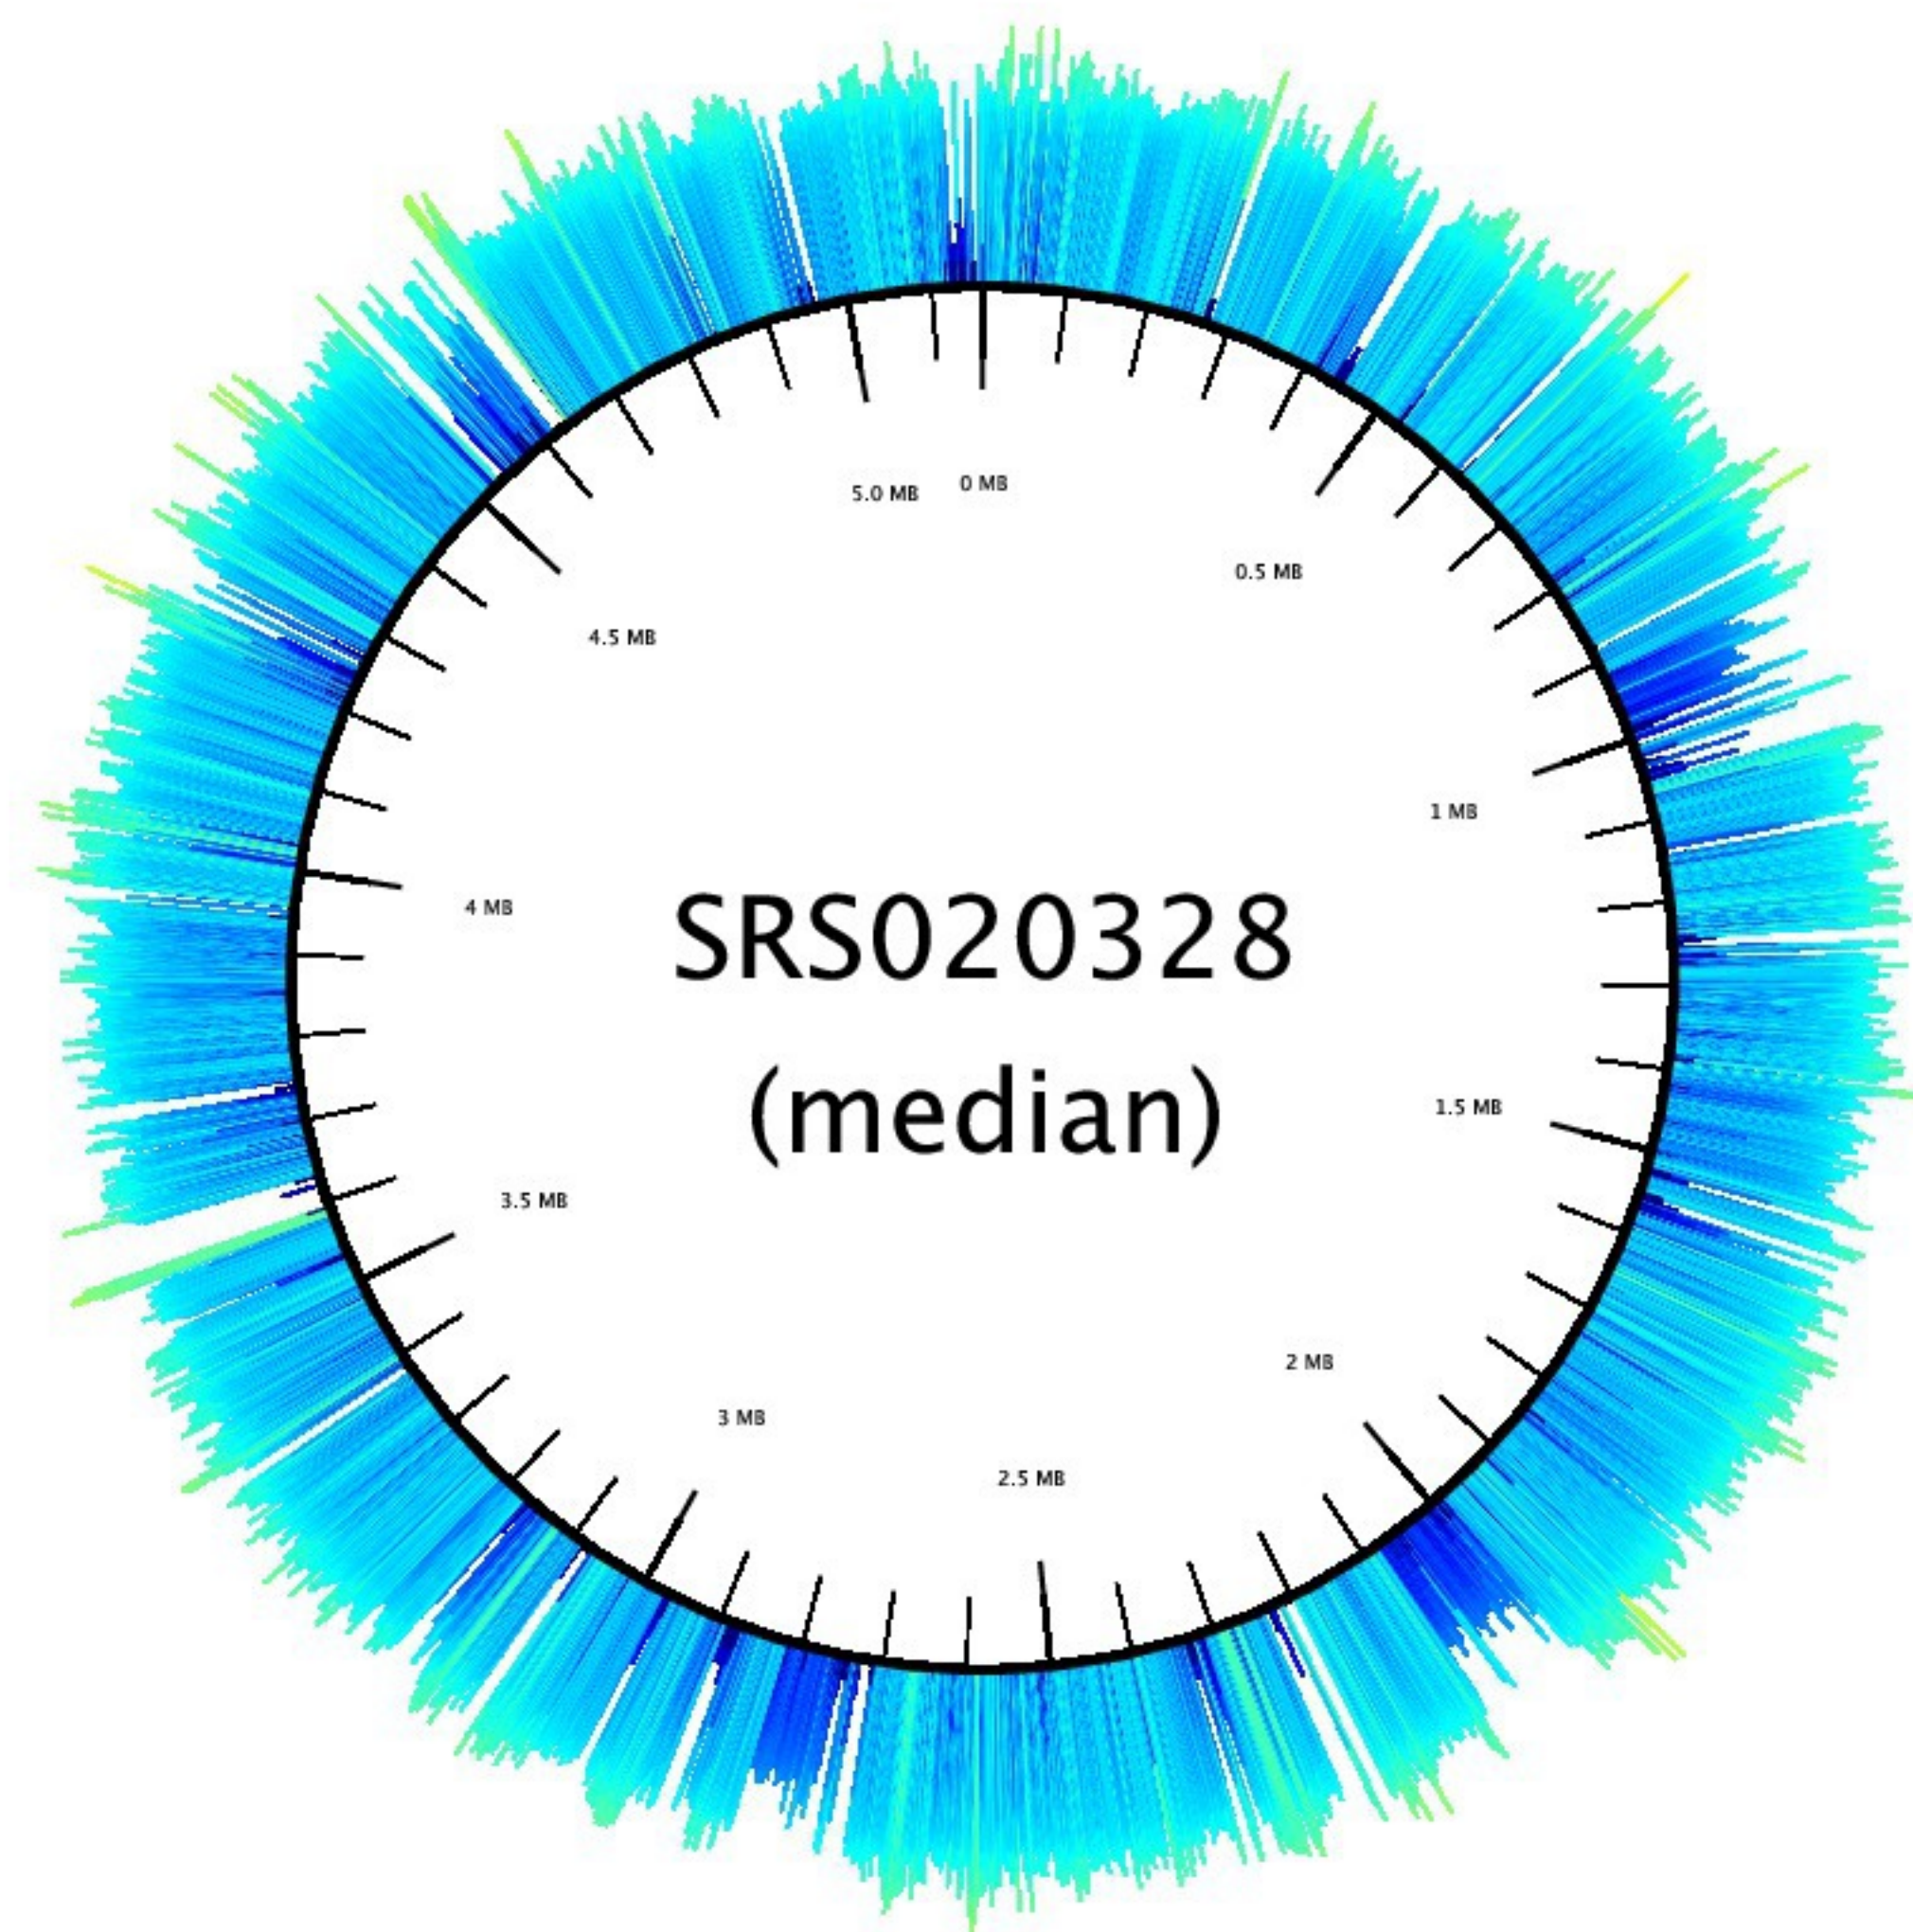



*Bacteroides vulgatus* PC510

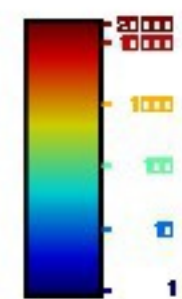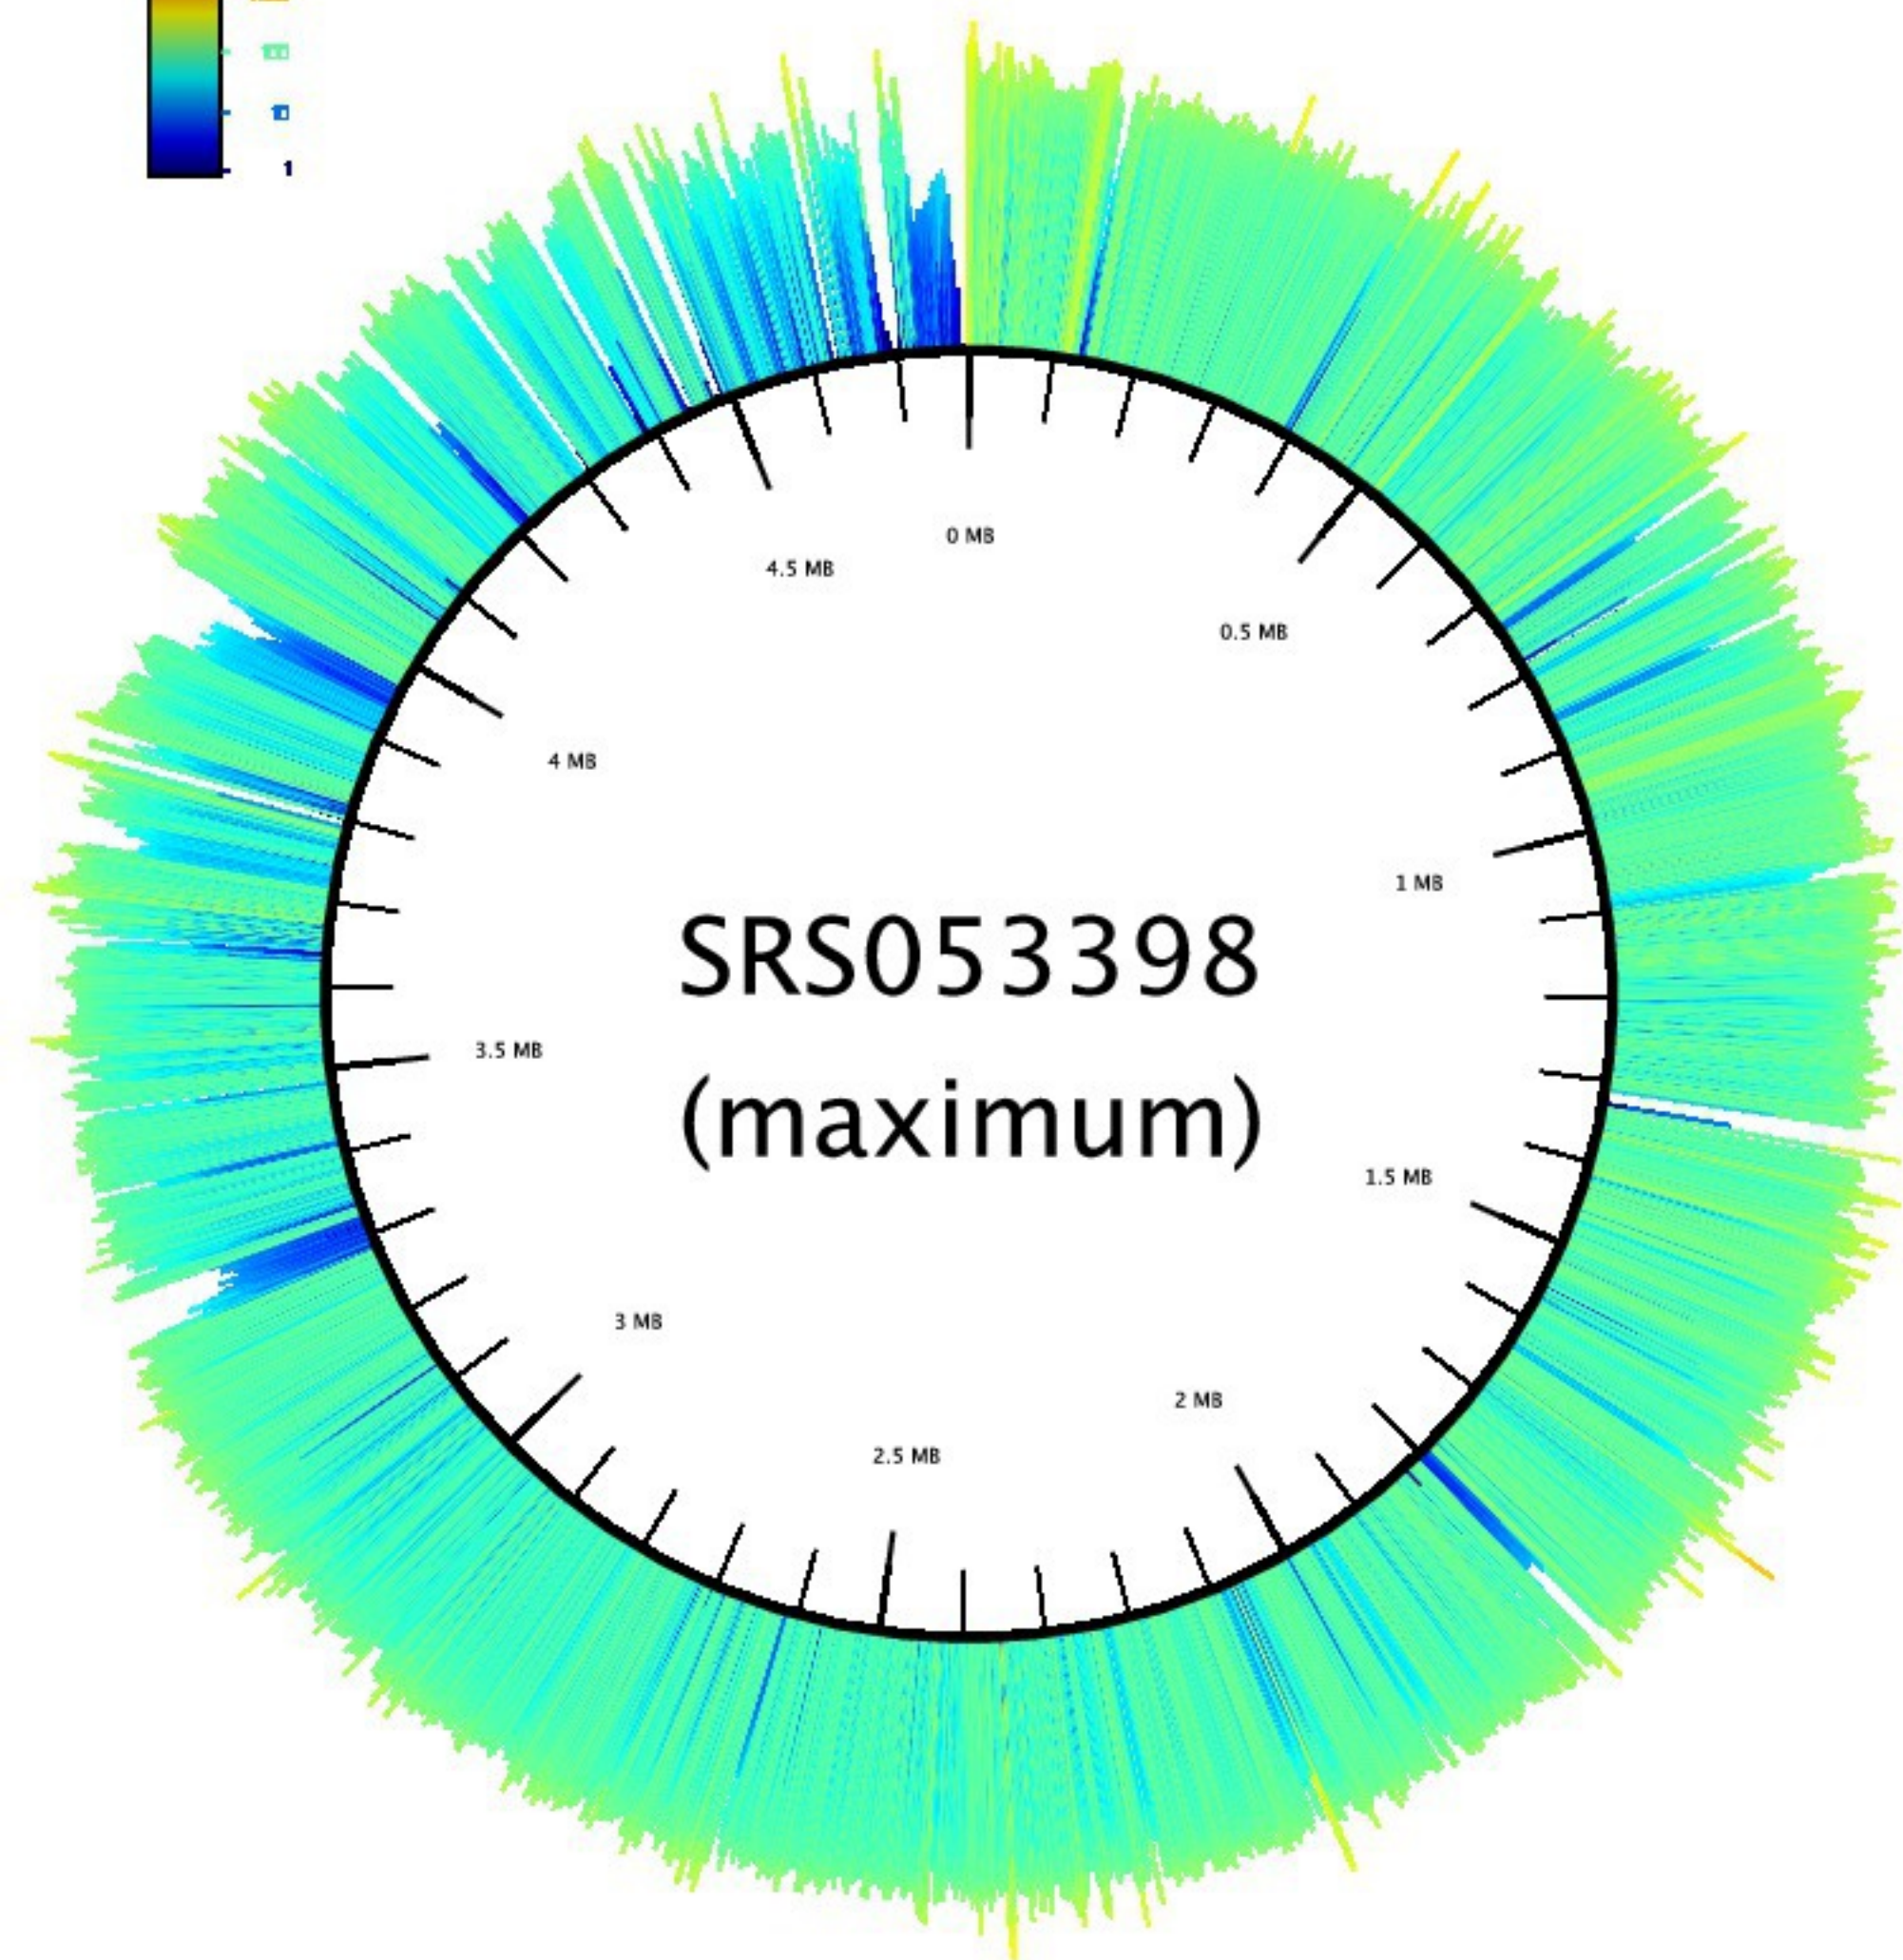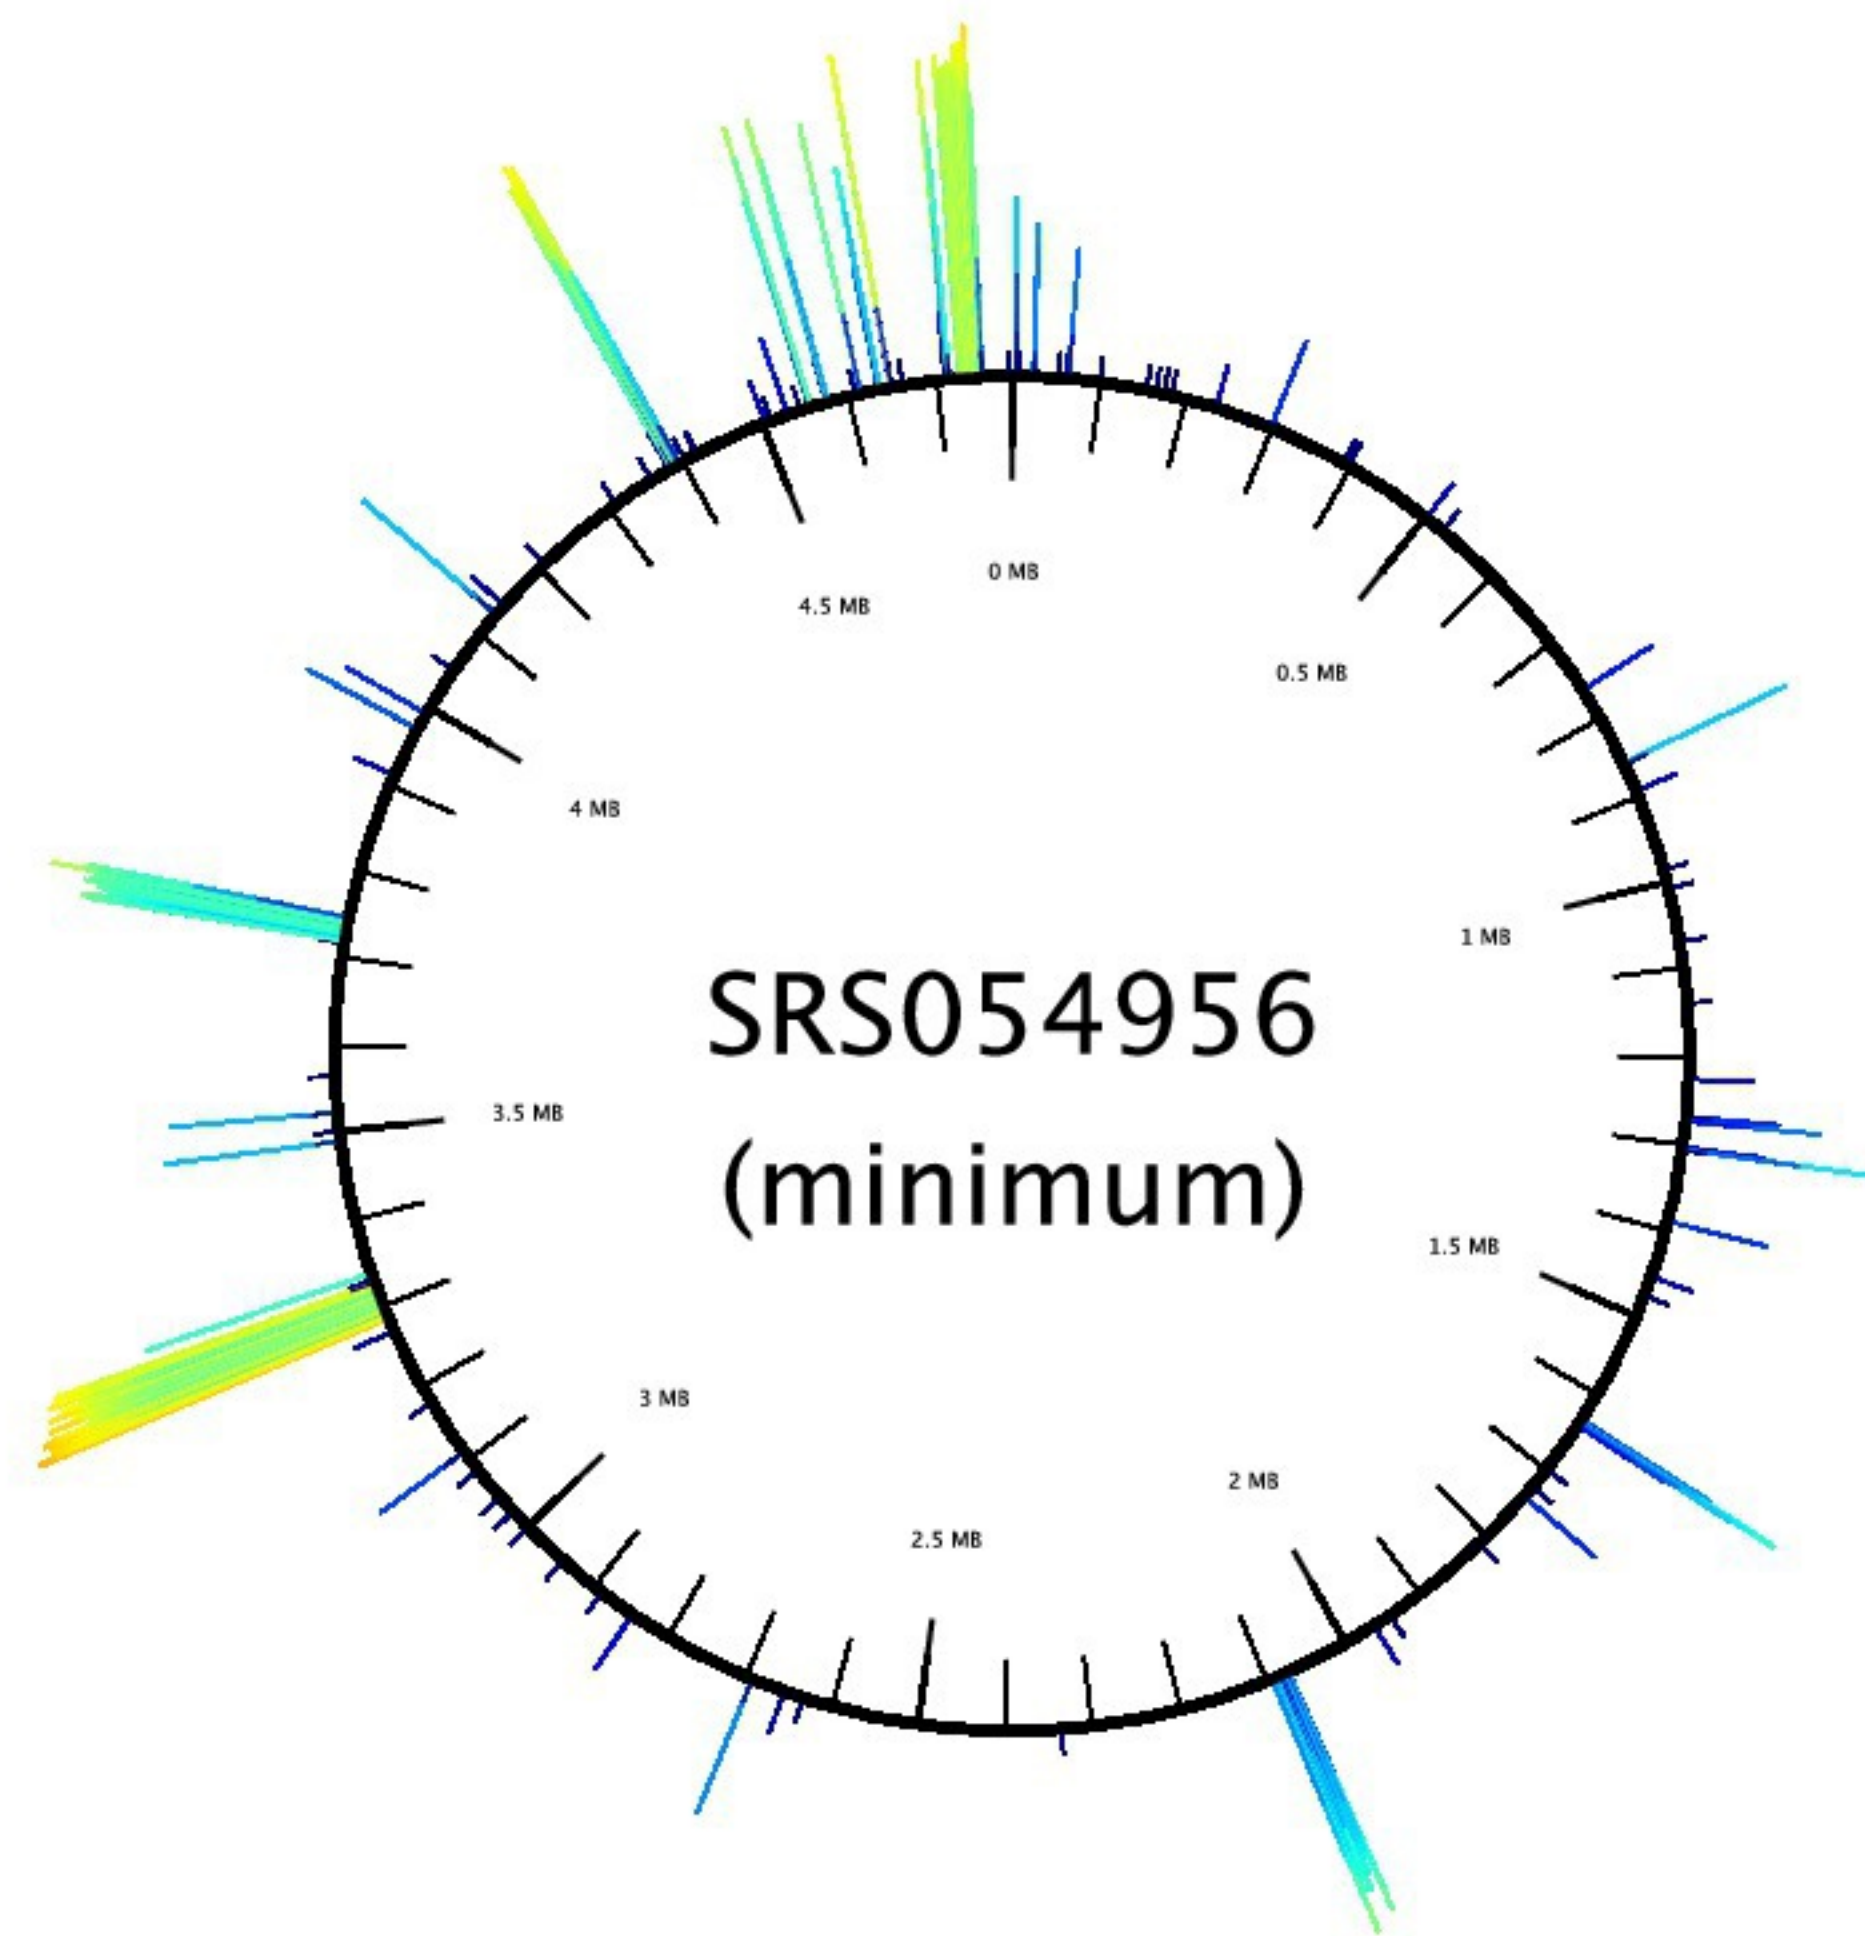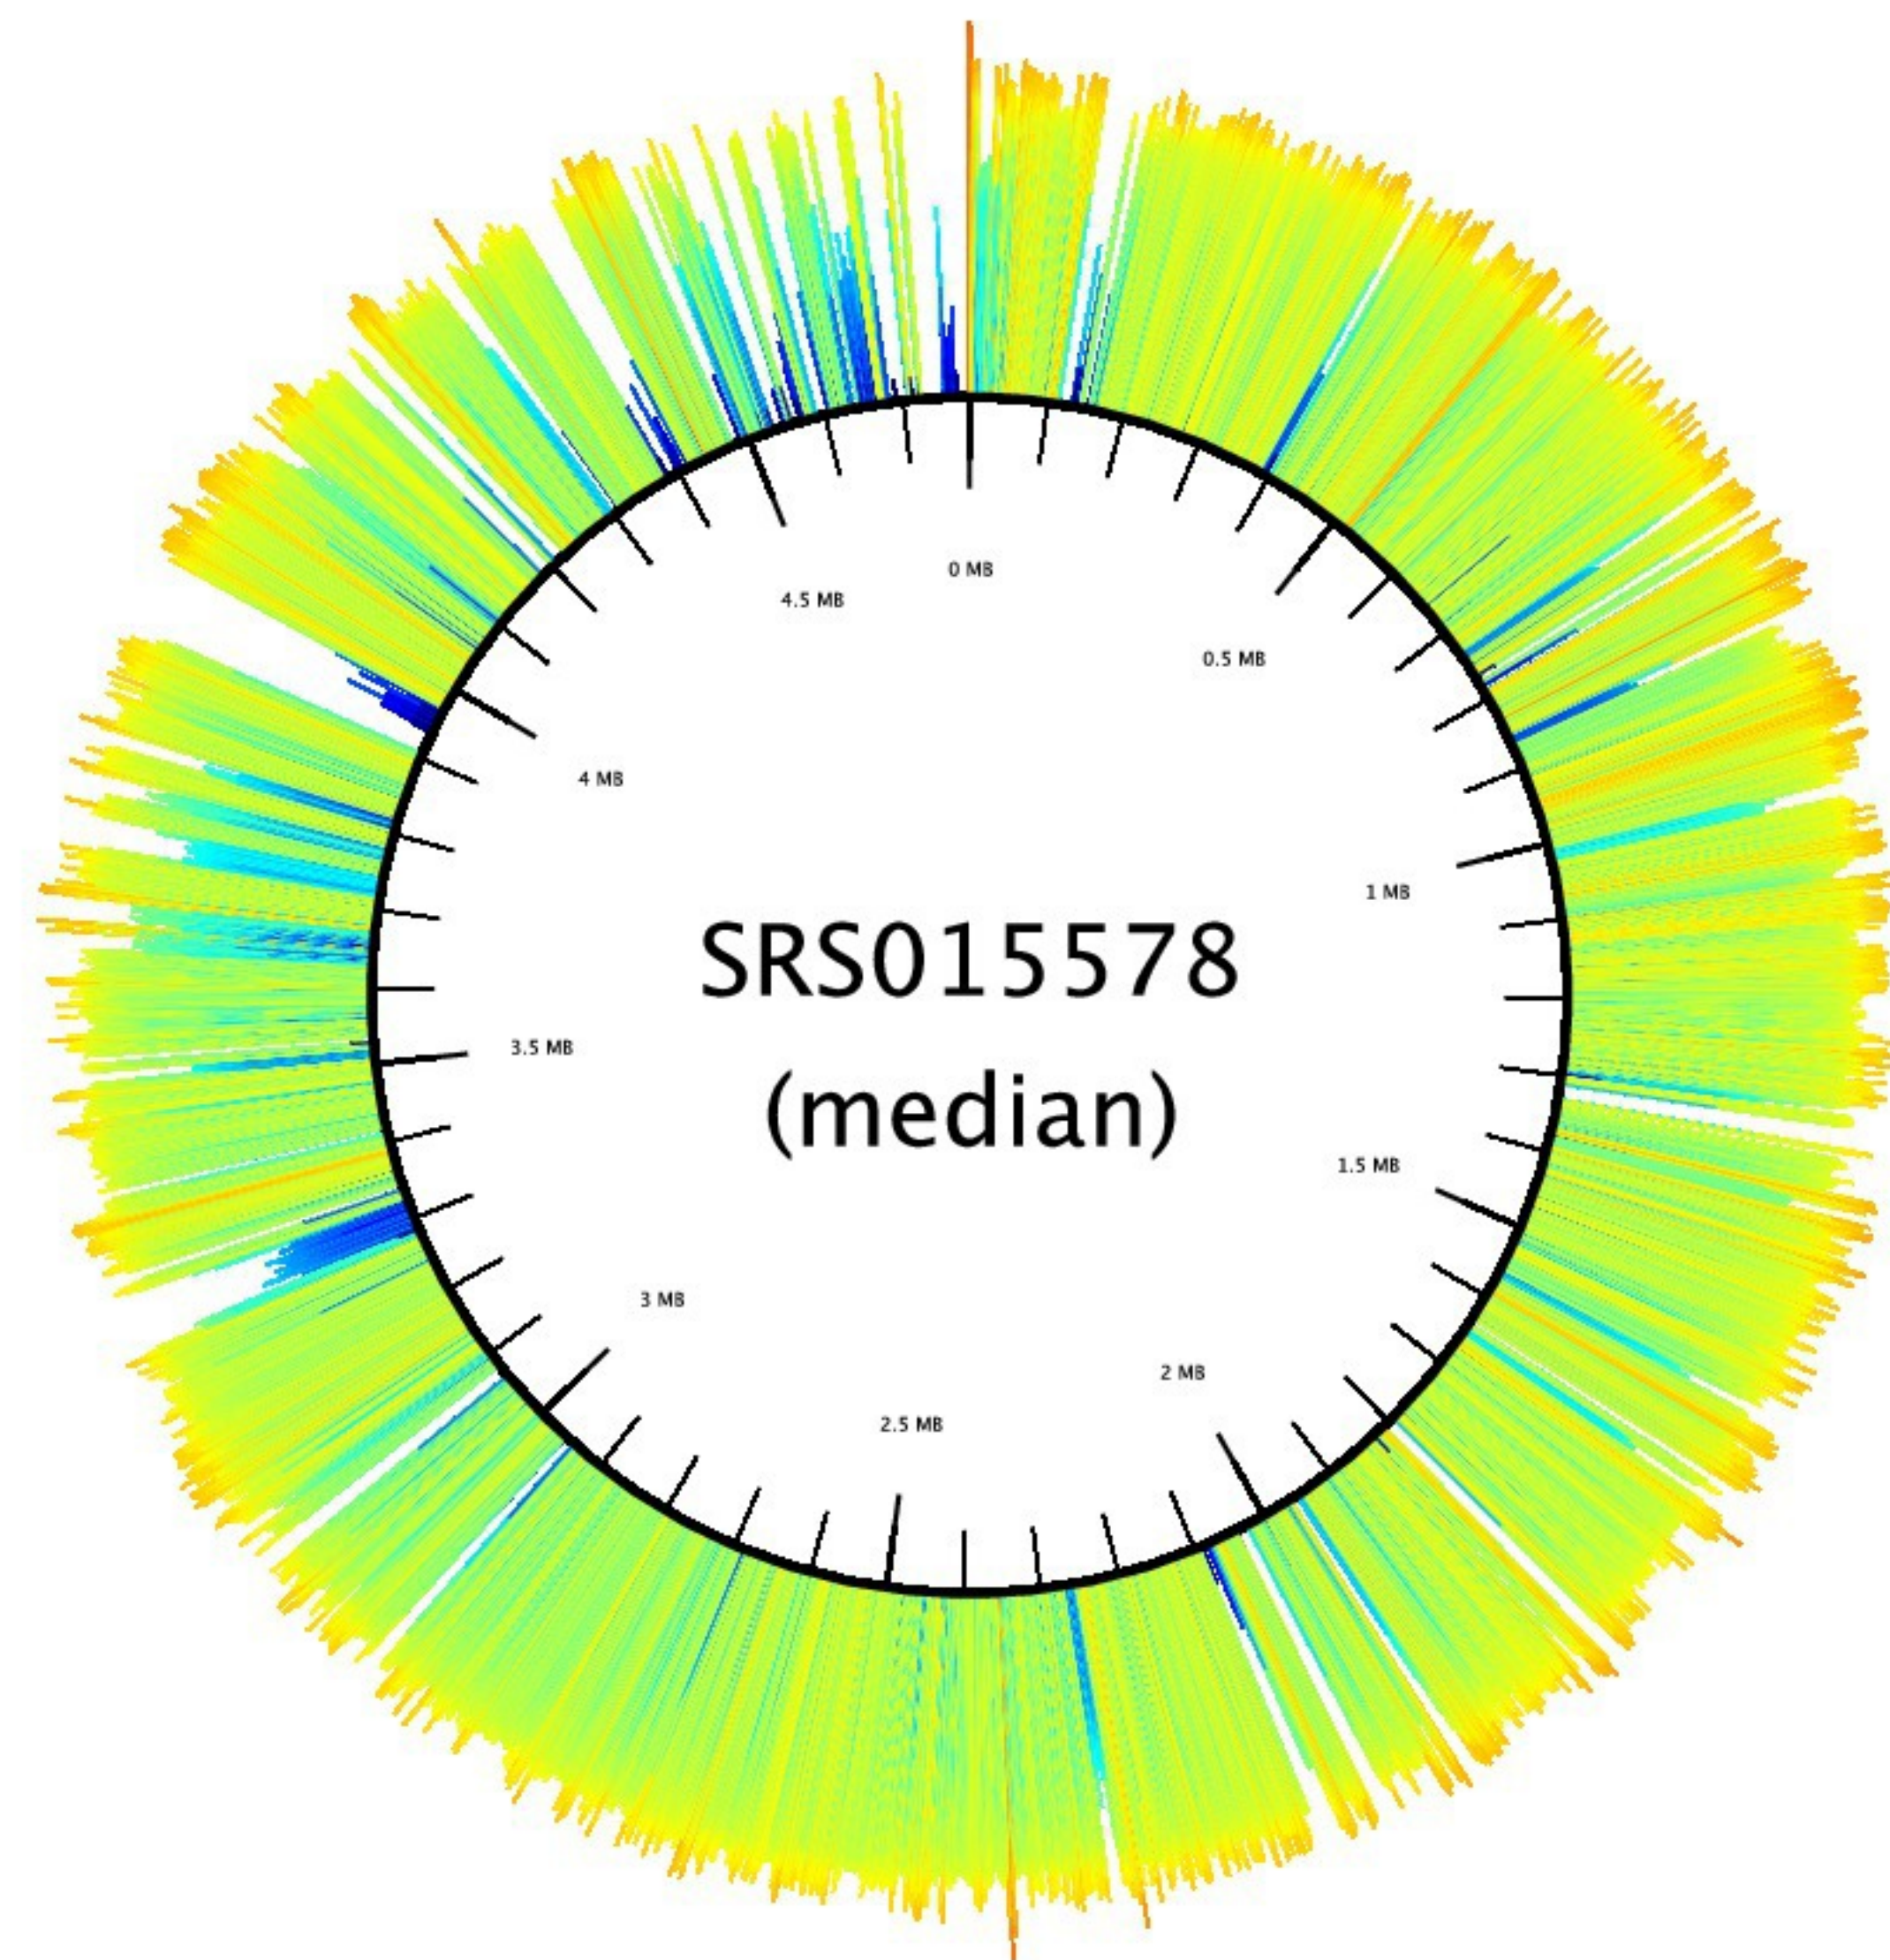

# *Burkholderiales* bacterium 1\_1\_47

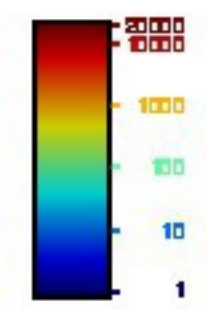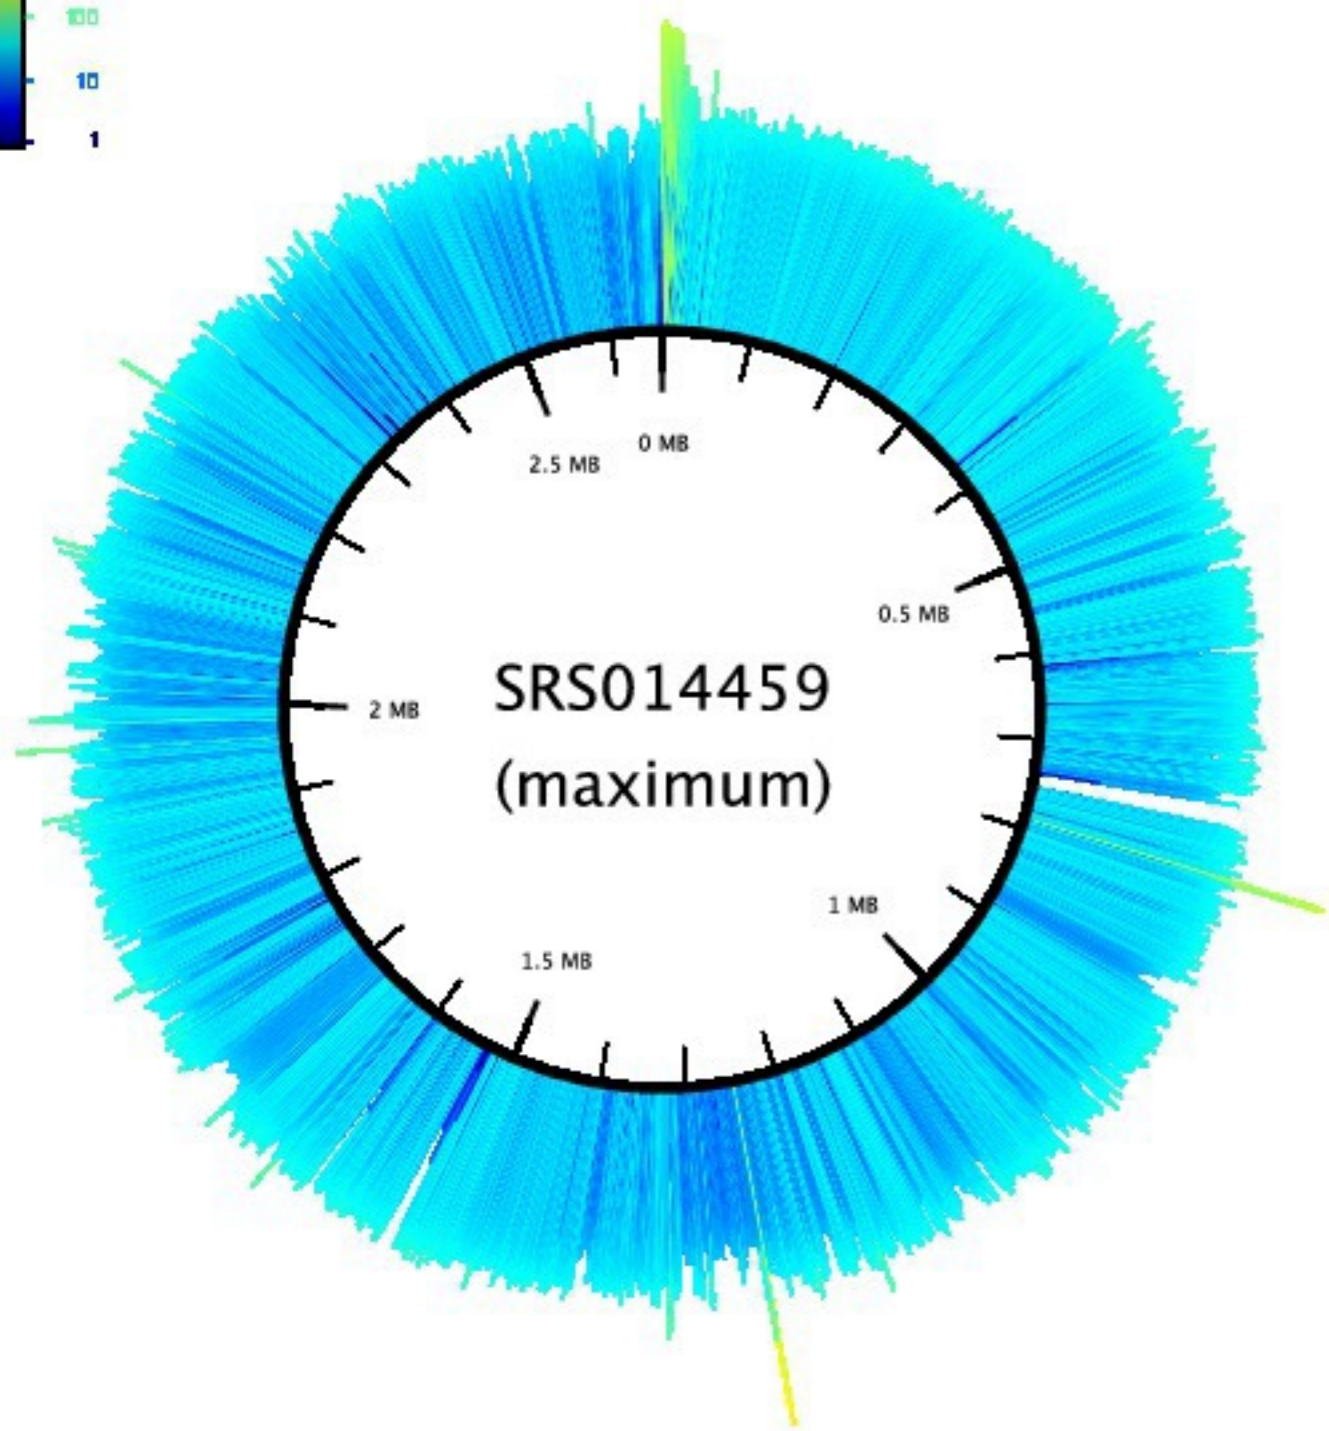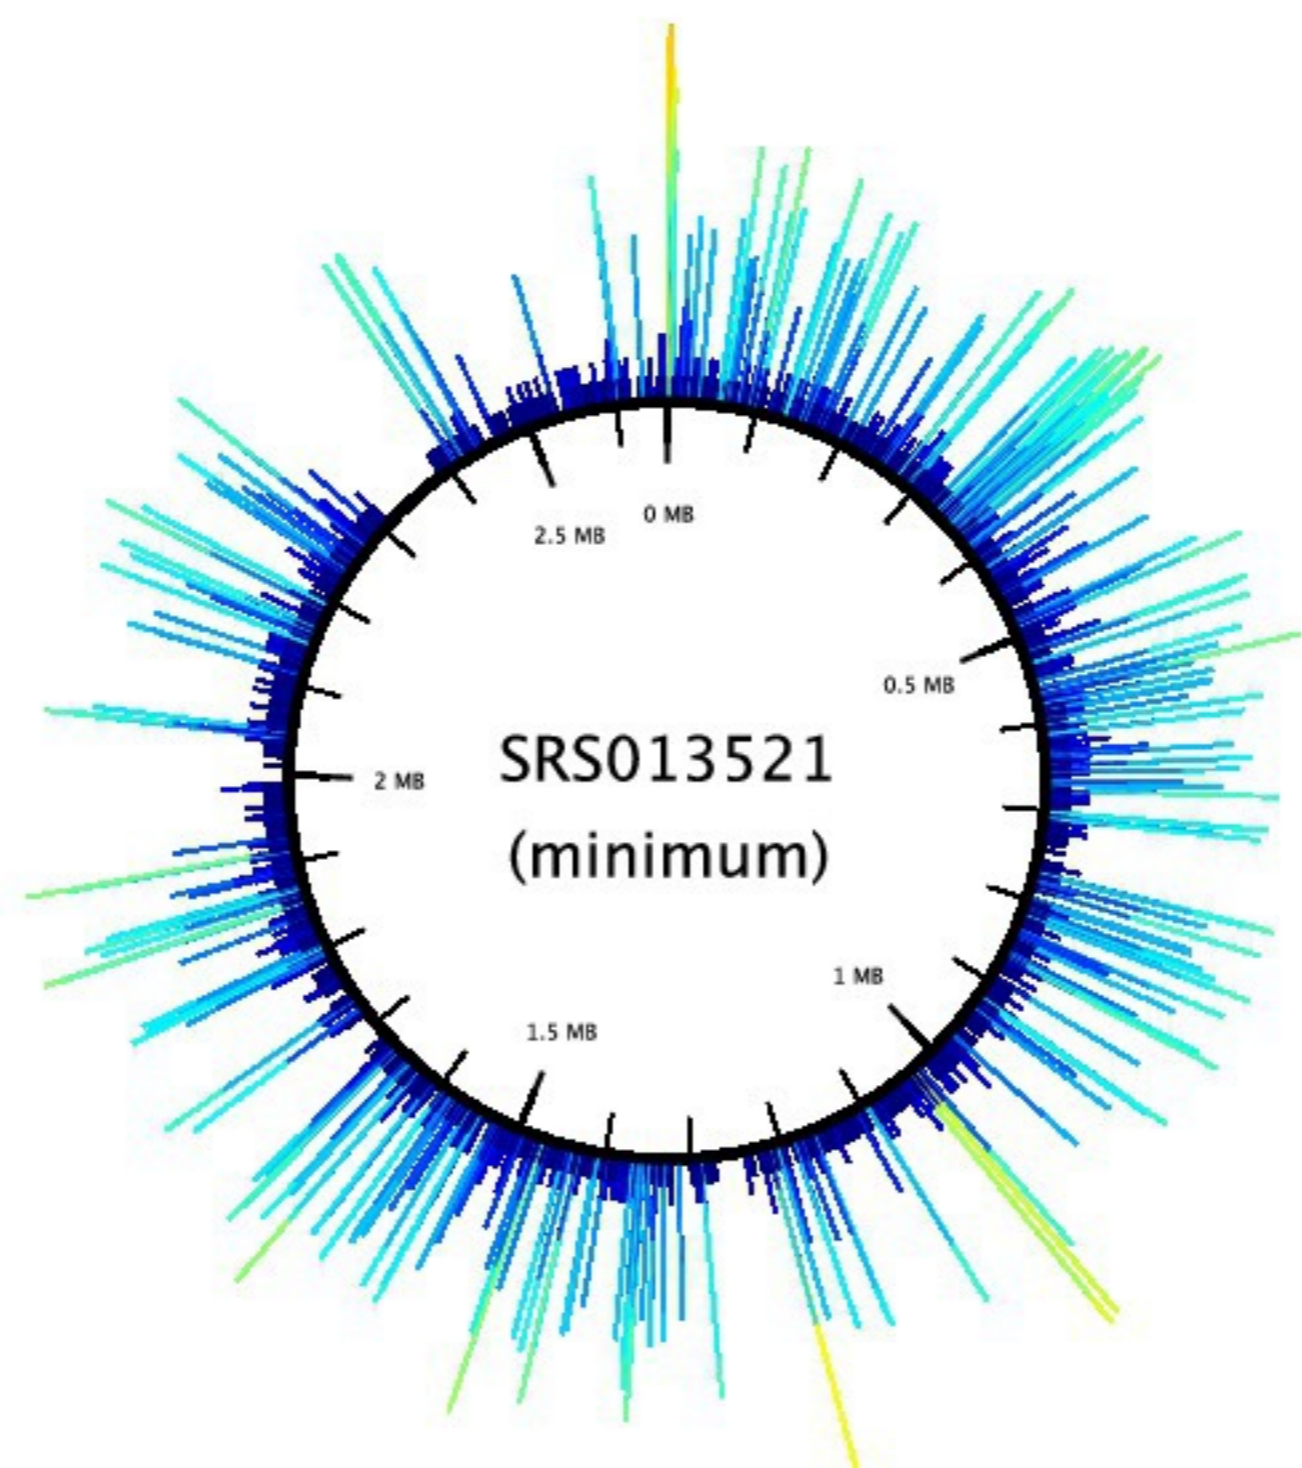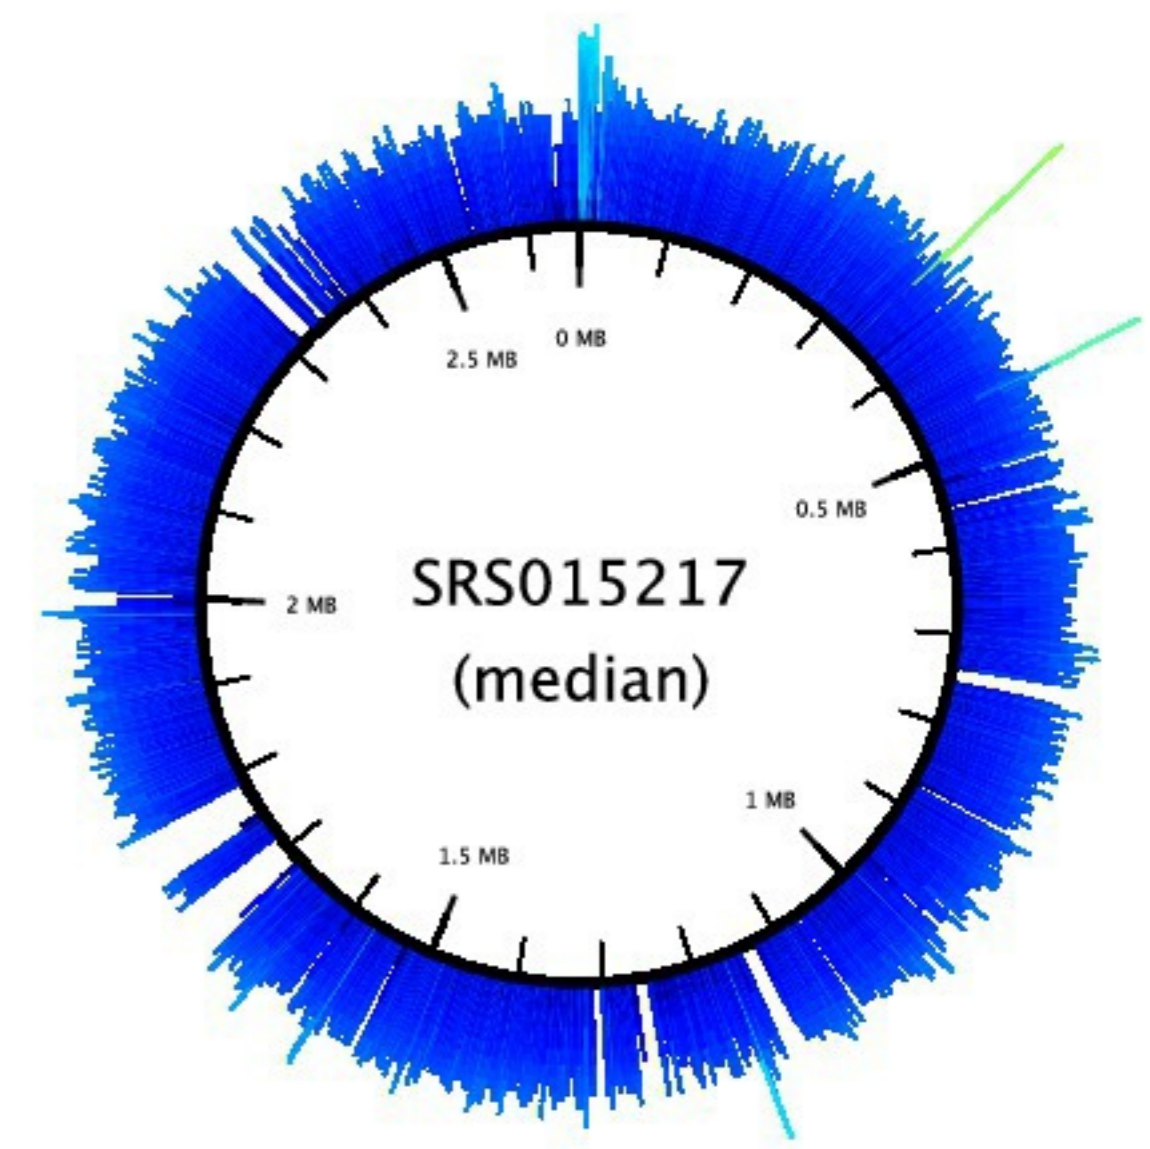

# *Butyrivibrio crossotus* DSM 2876

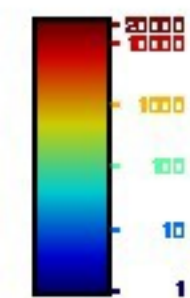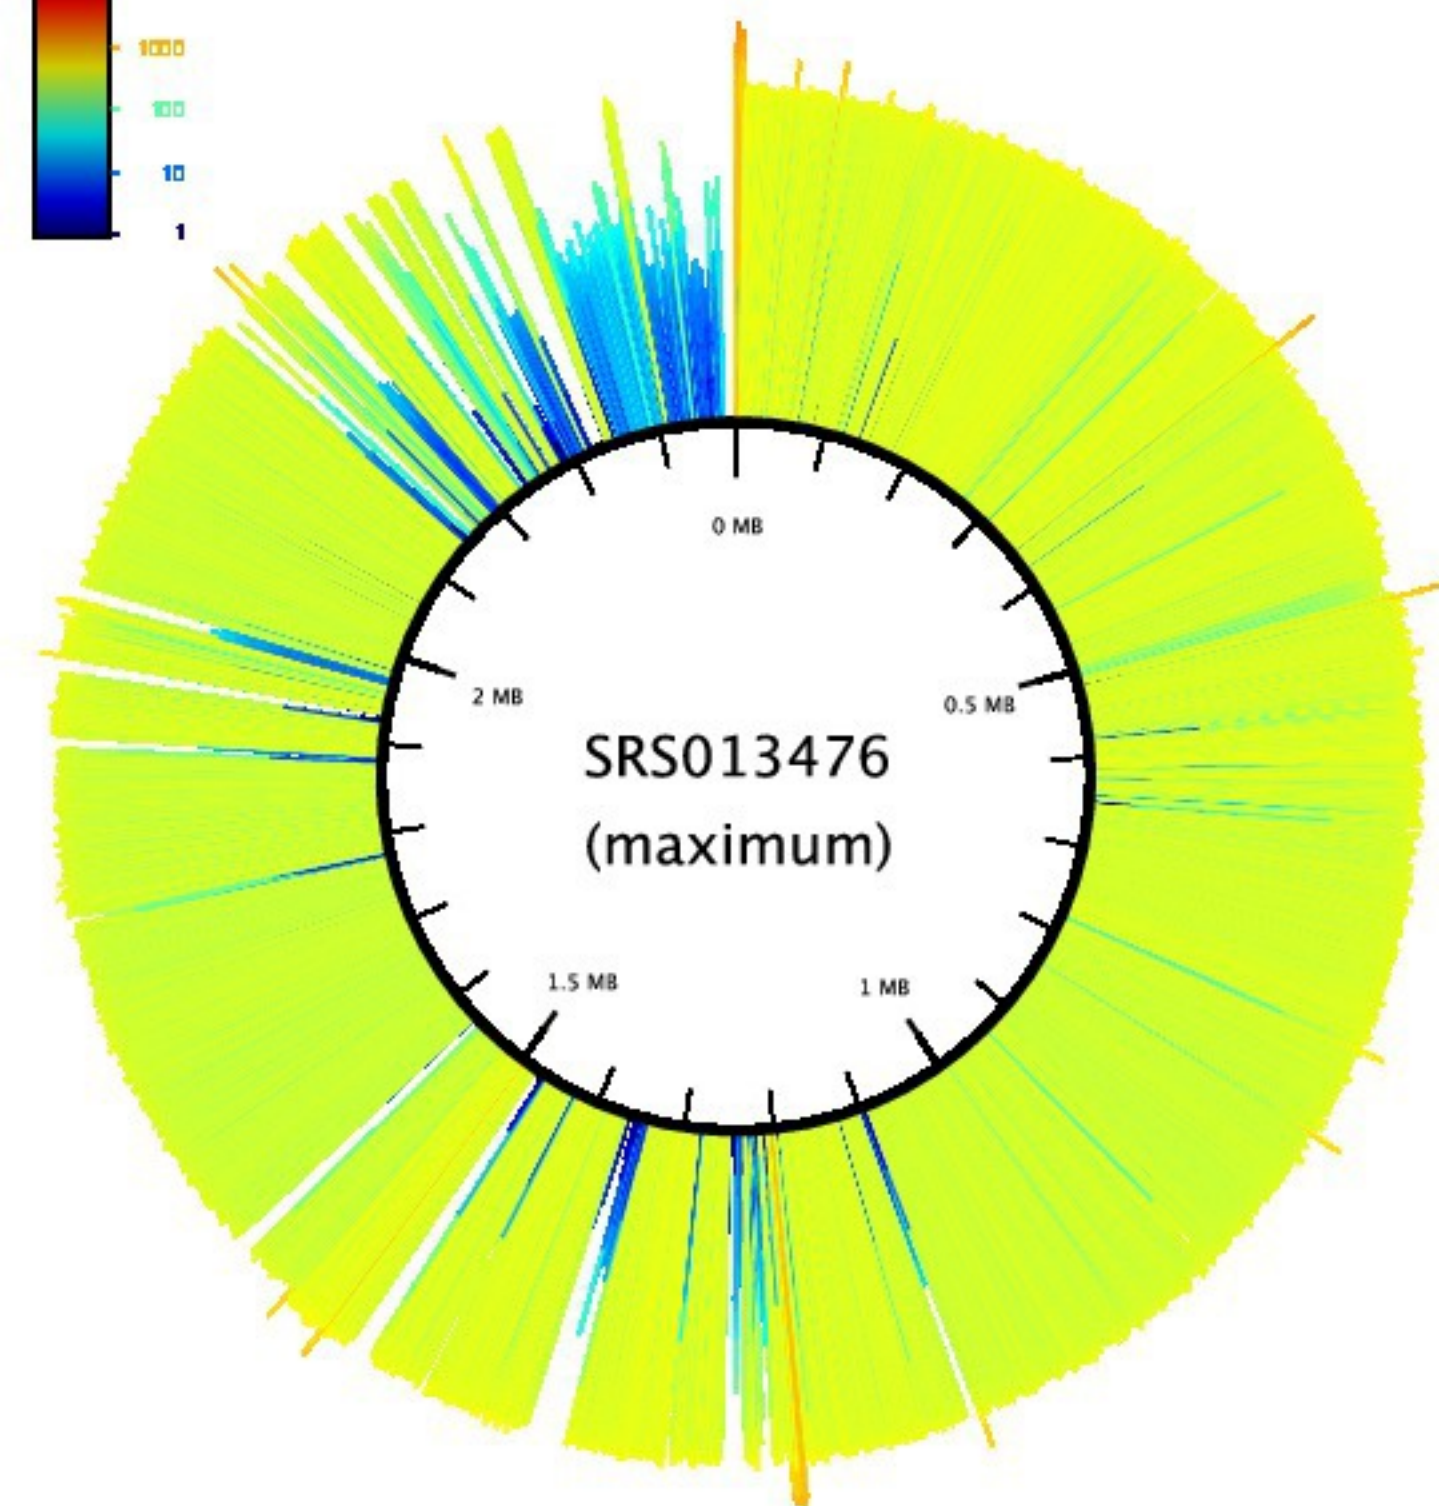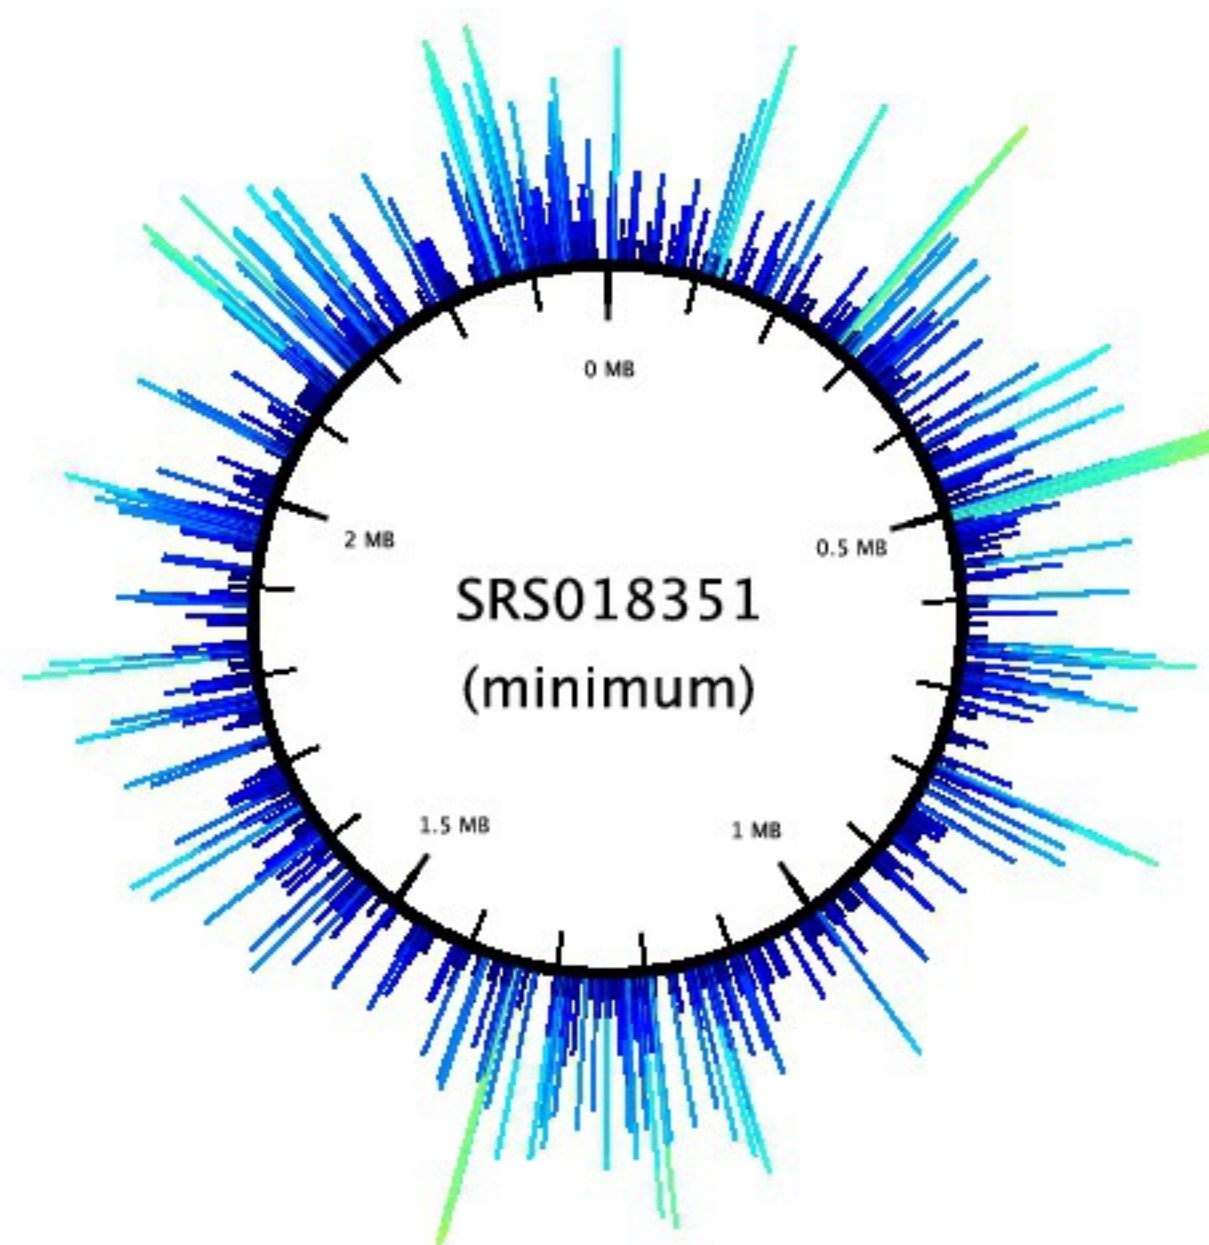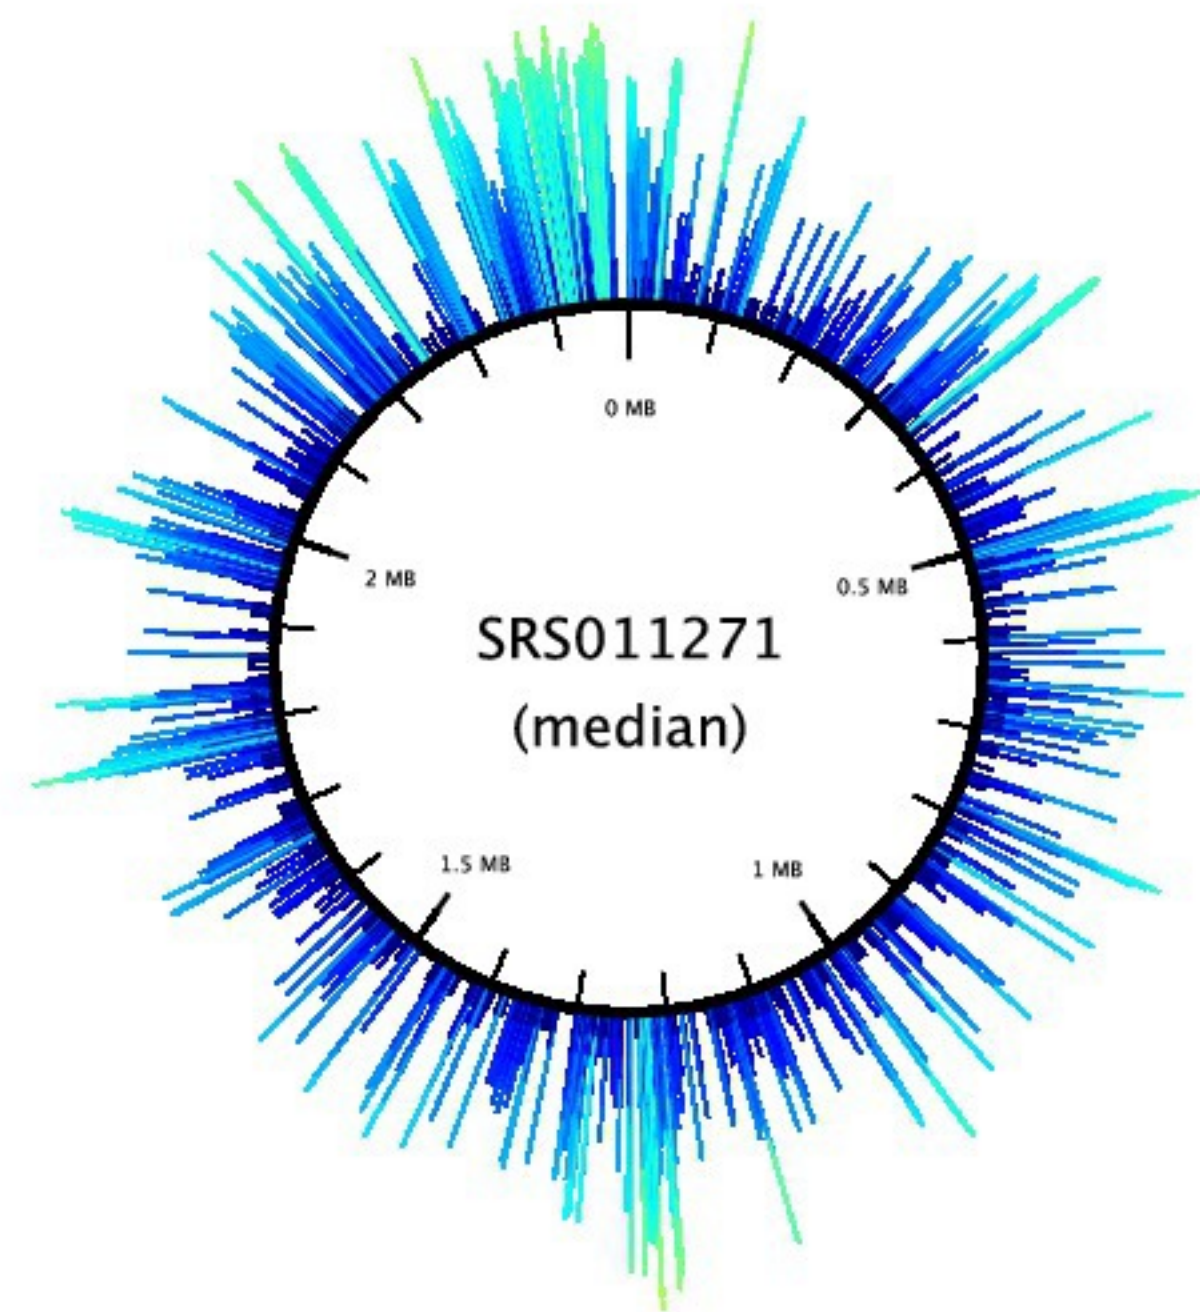

# *Collinsella aerofaciens* ATCC 25986

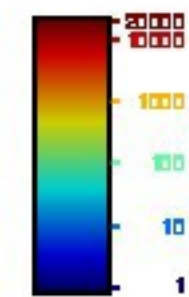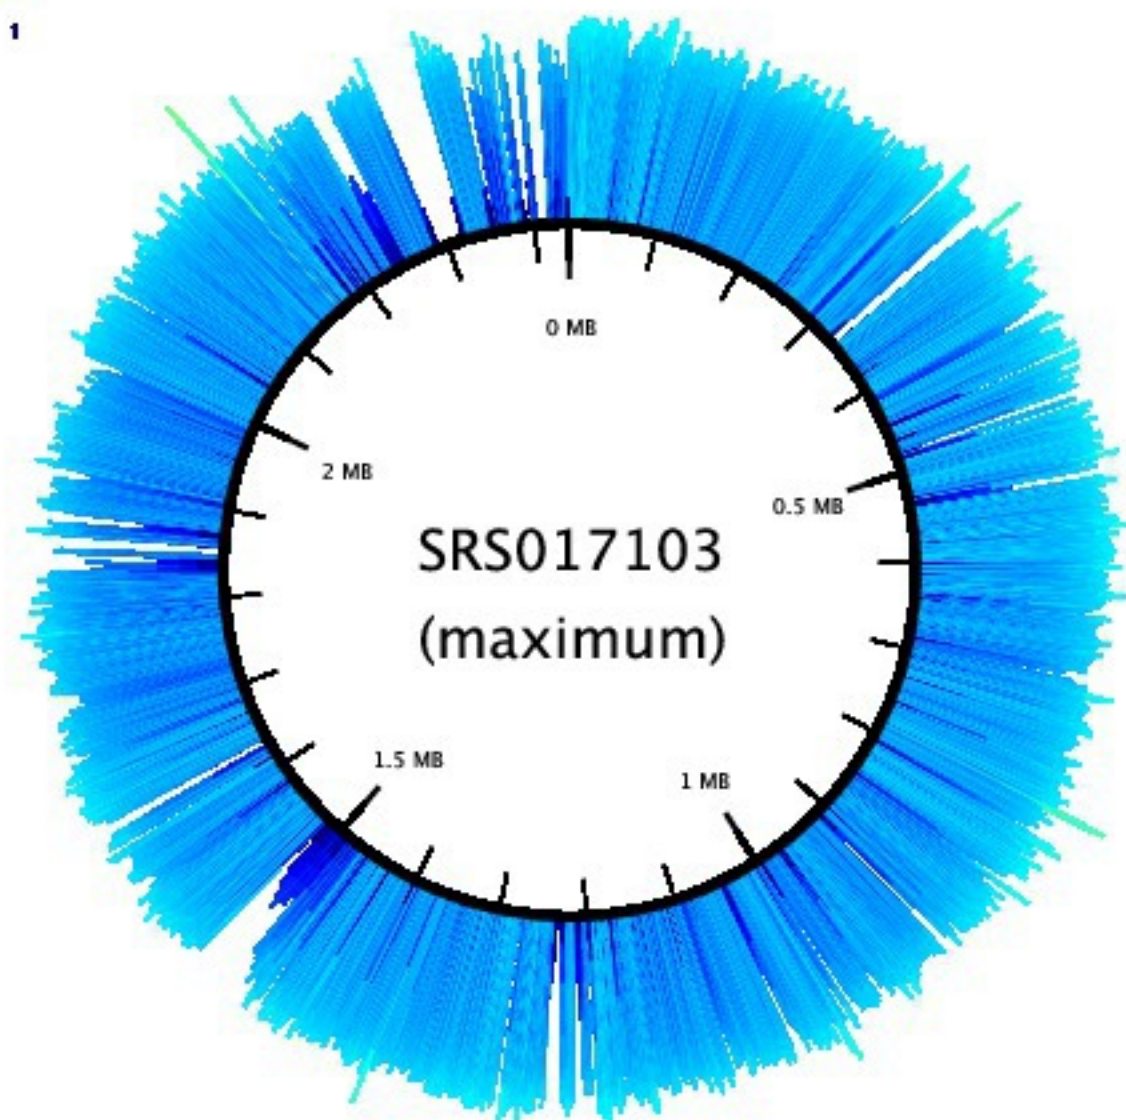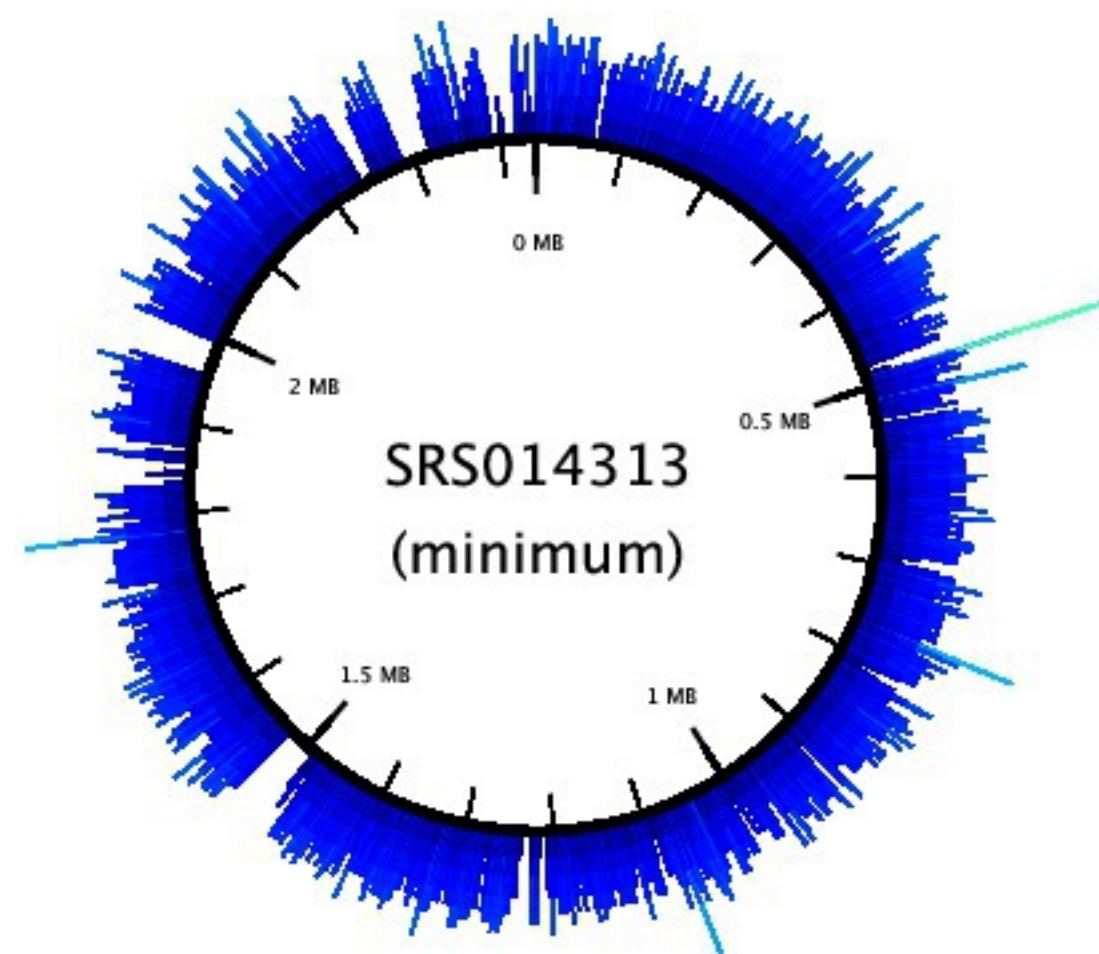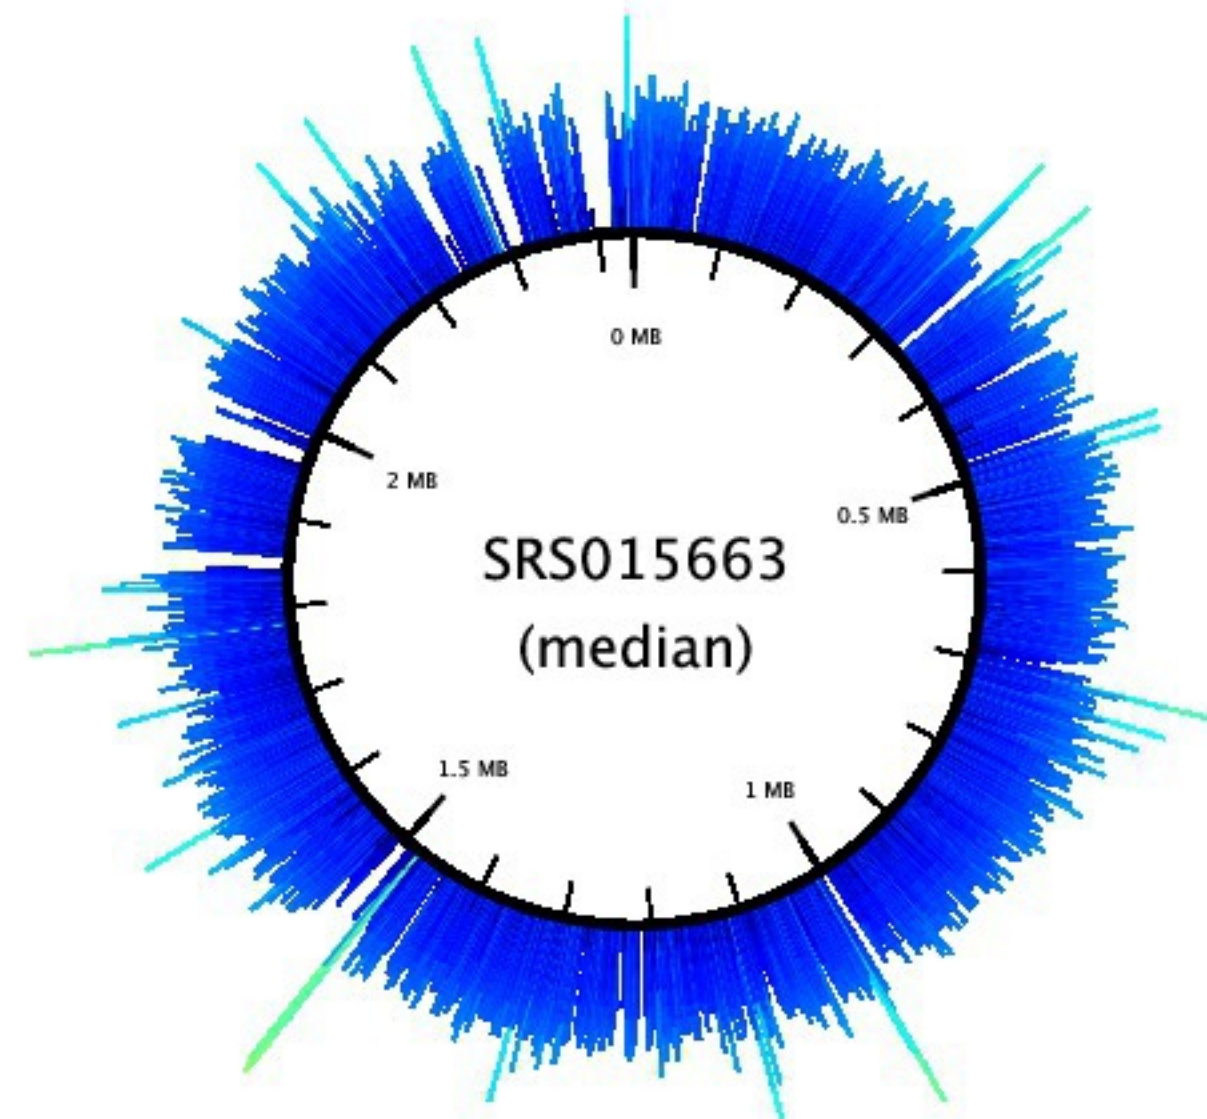

# *Dialister invisus* DSM 15470

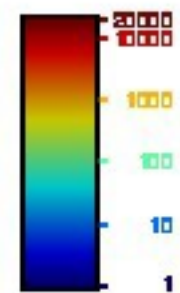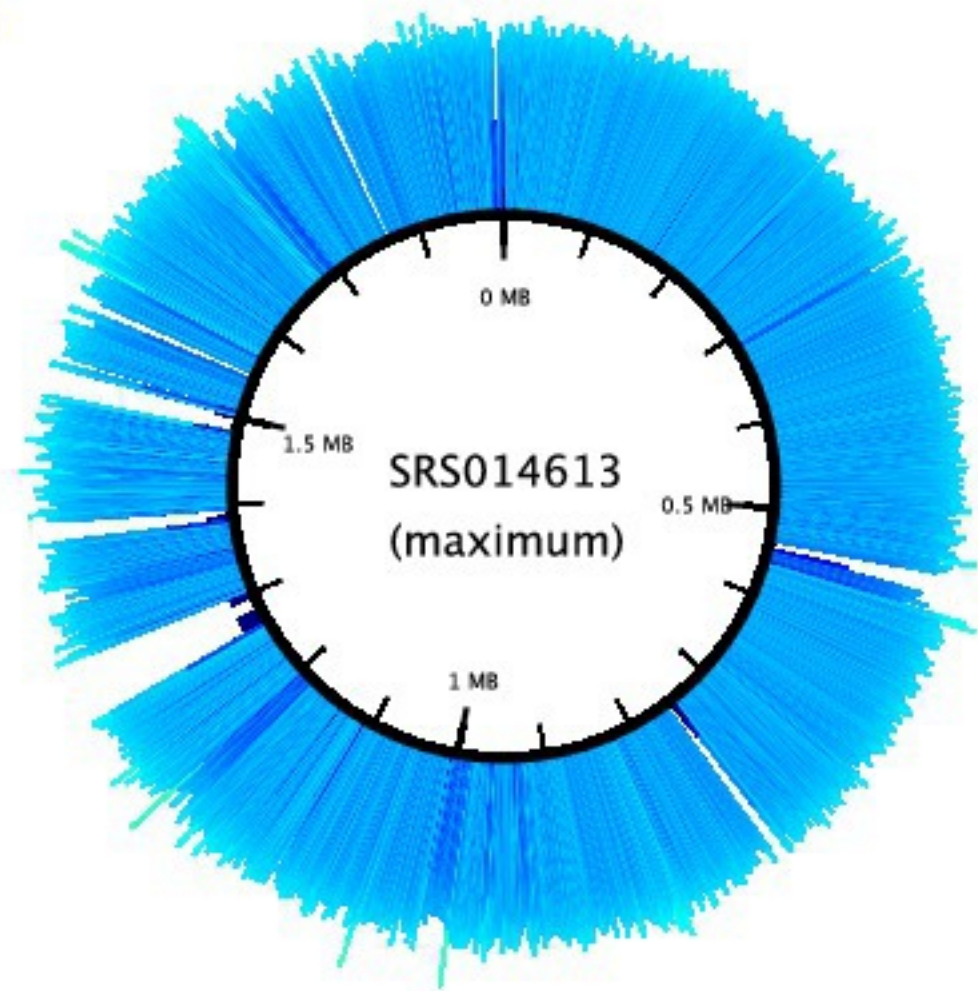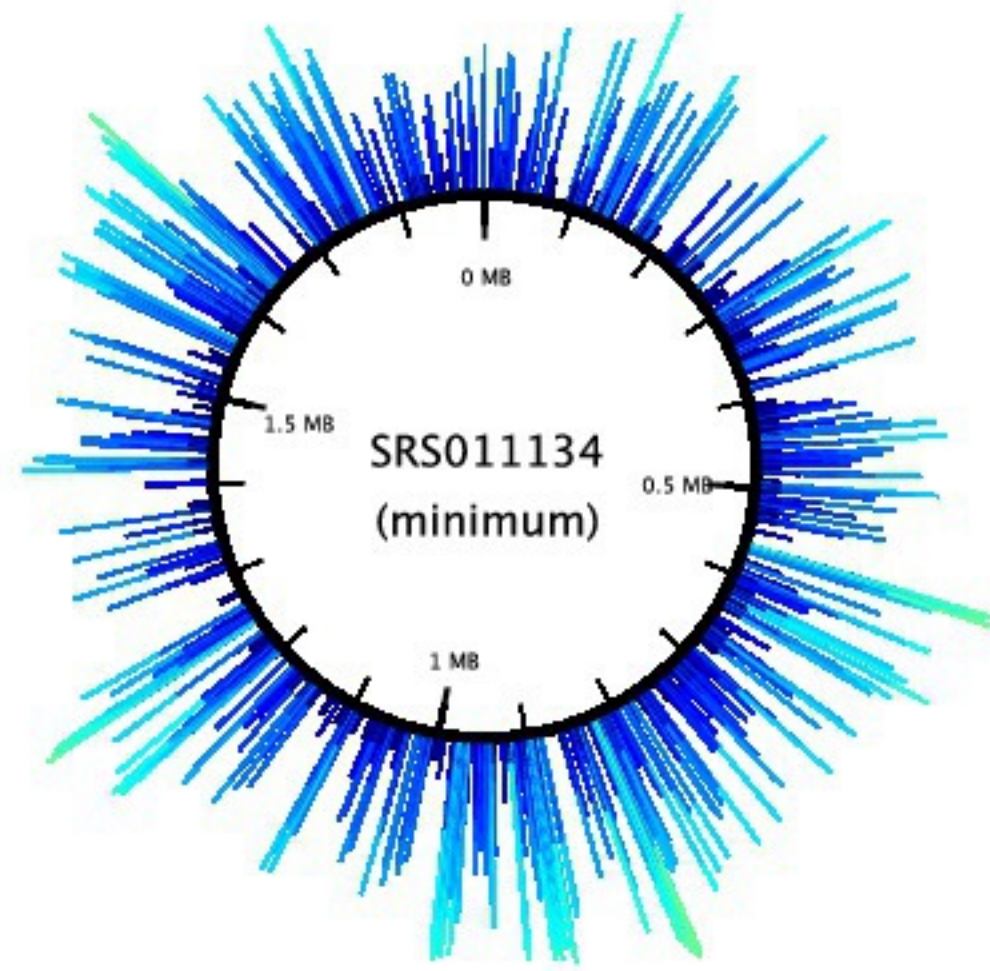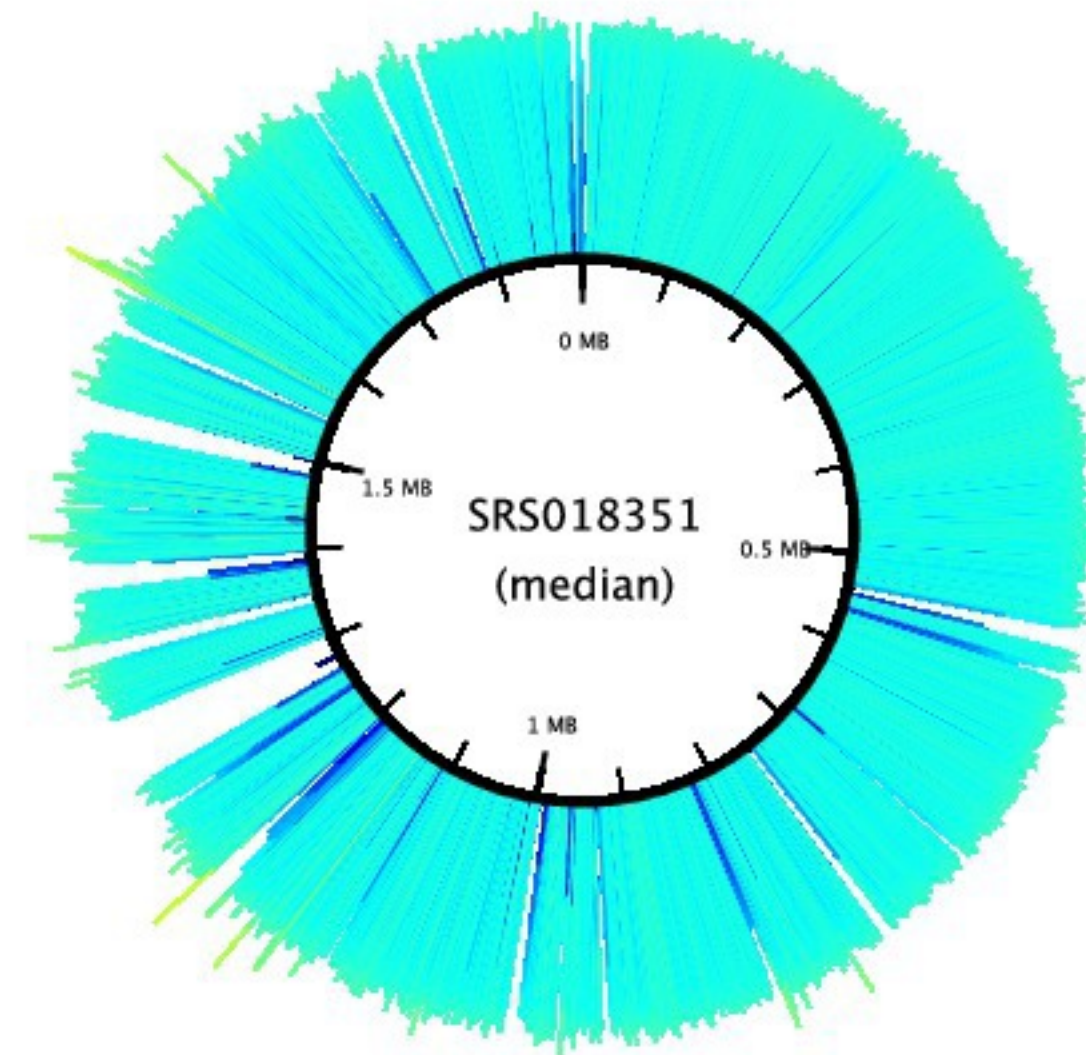

# *Eubacterium rectale* ATCC 33656

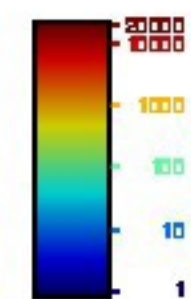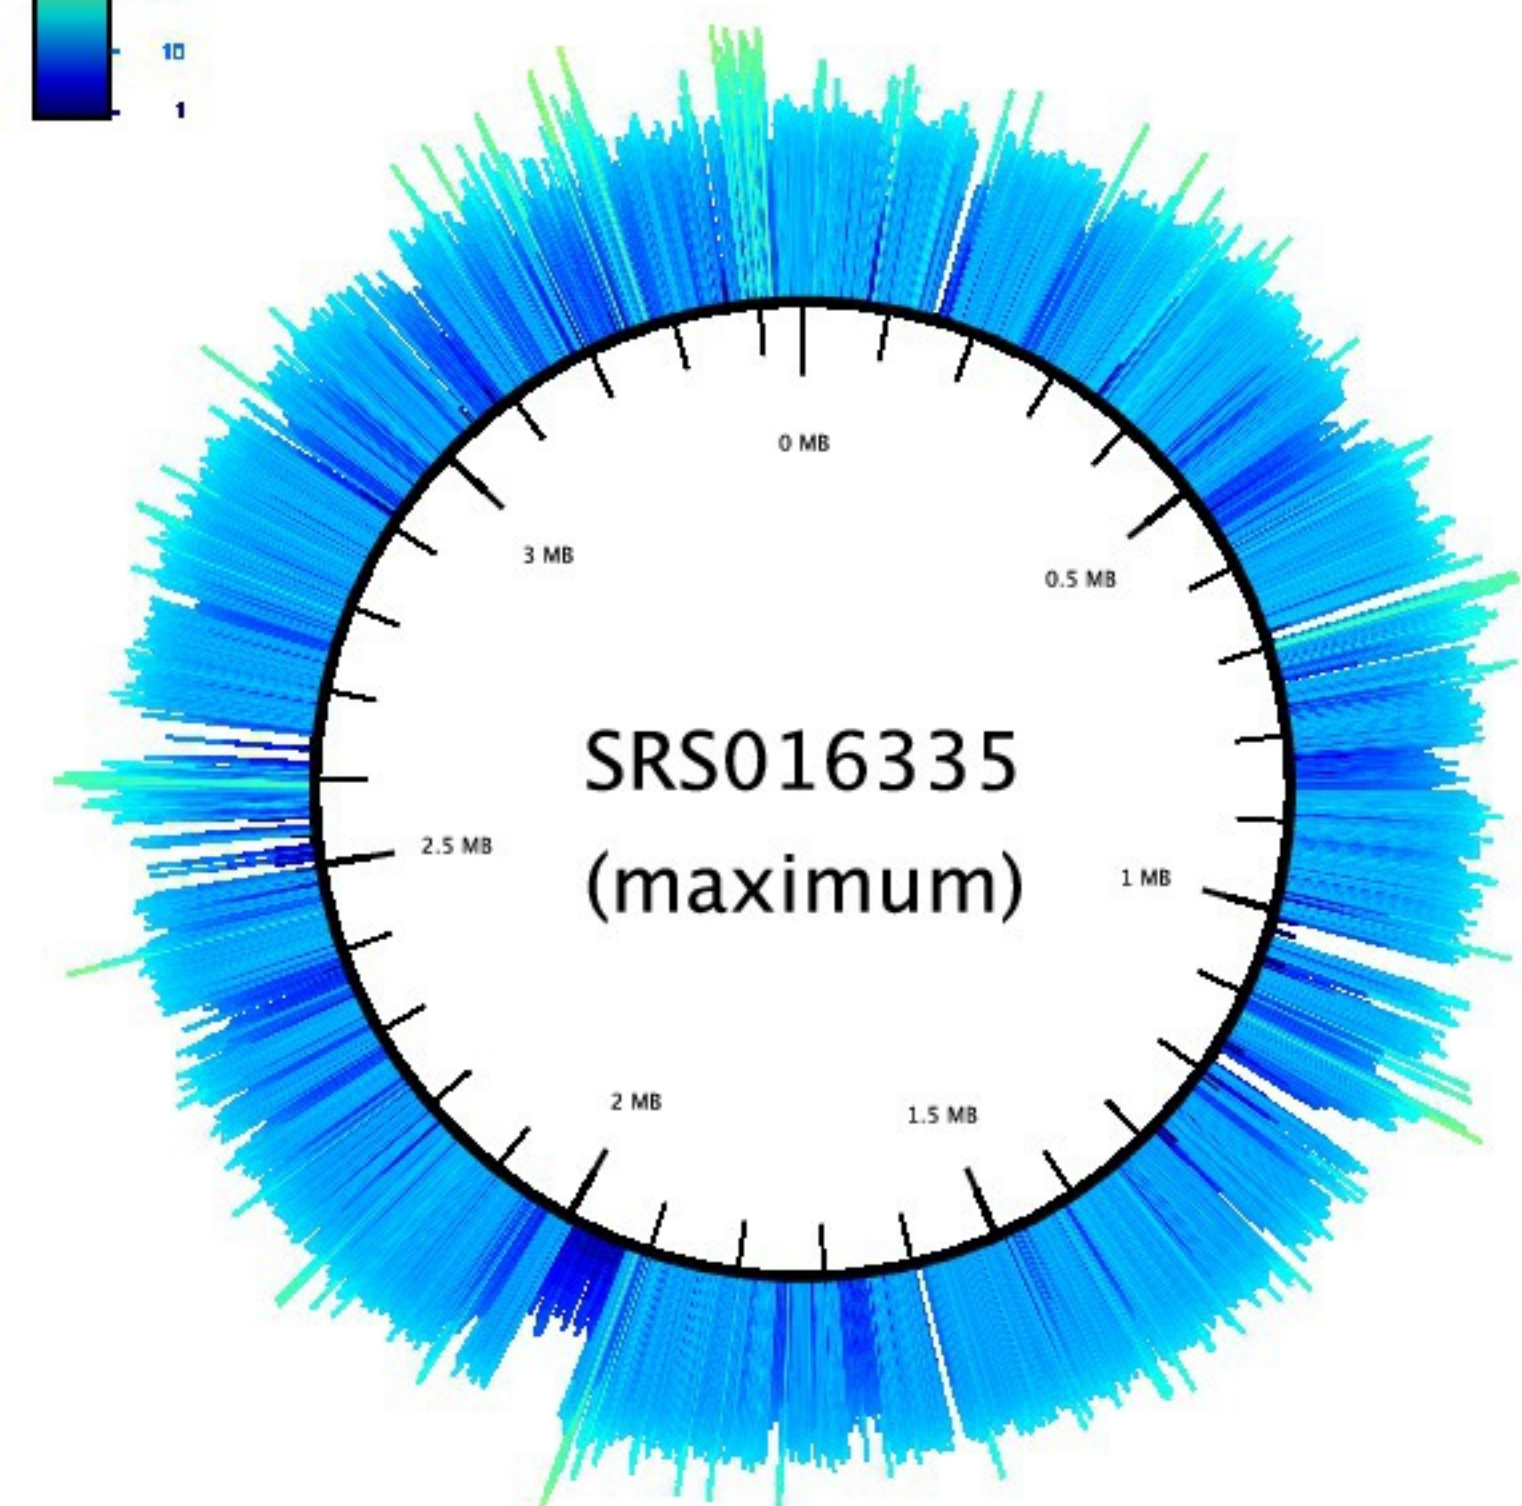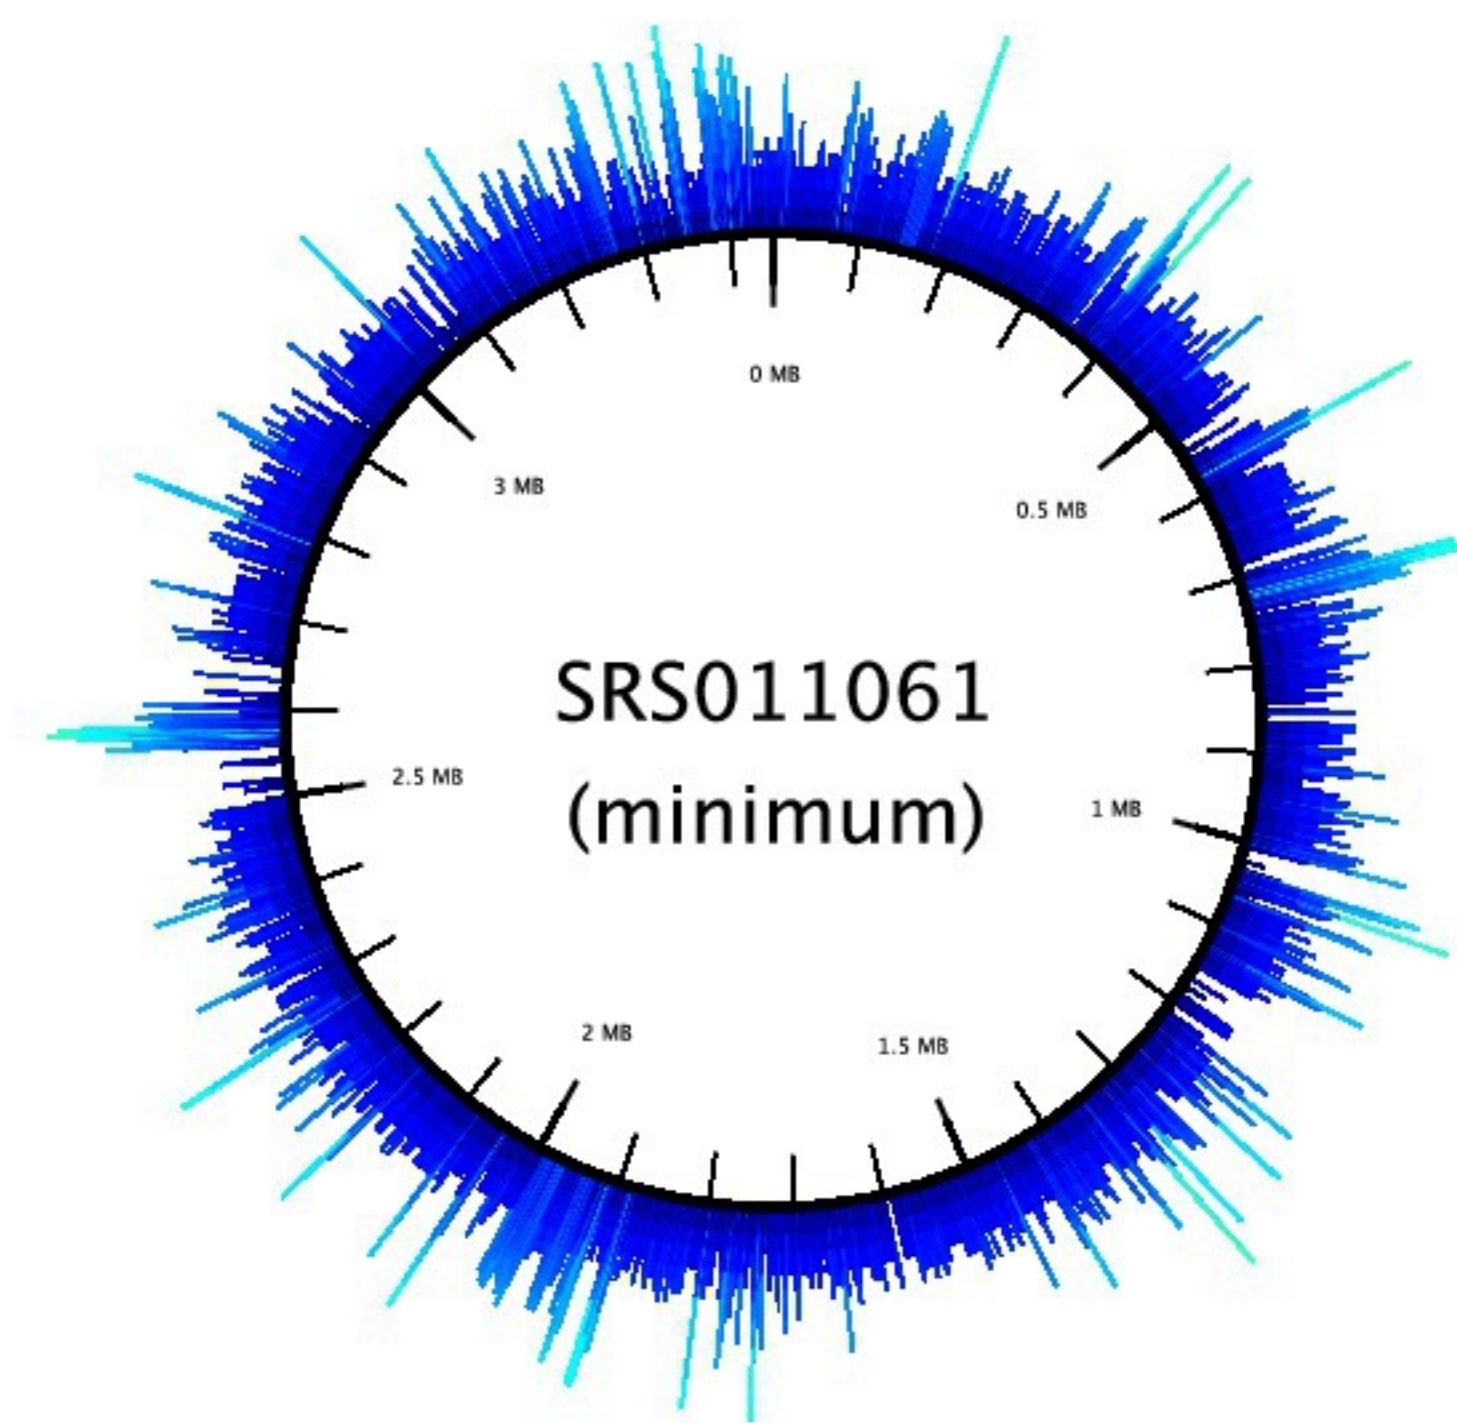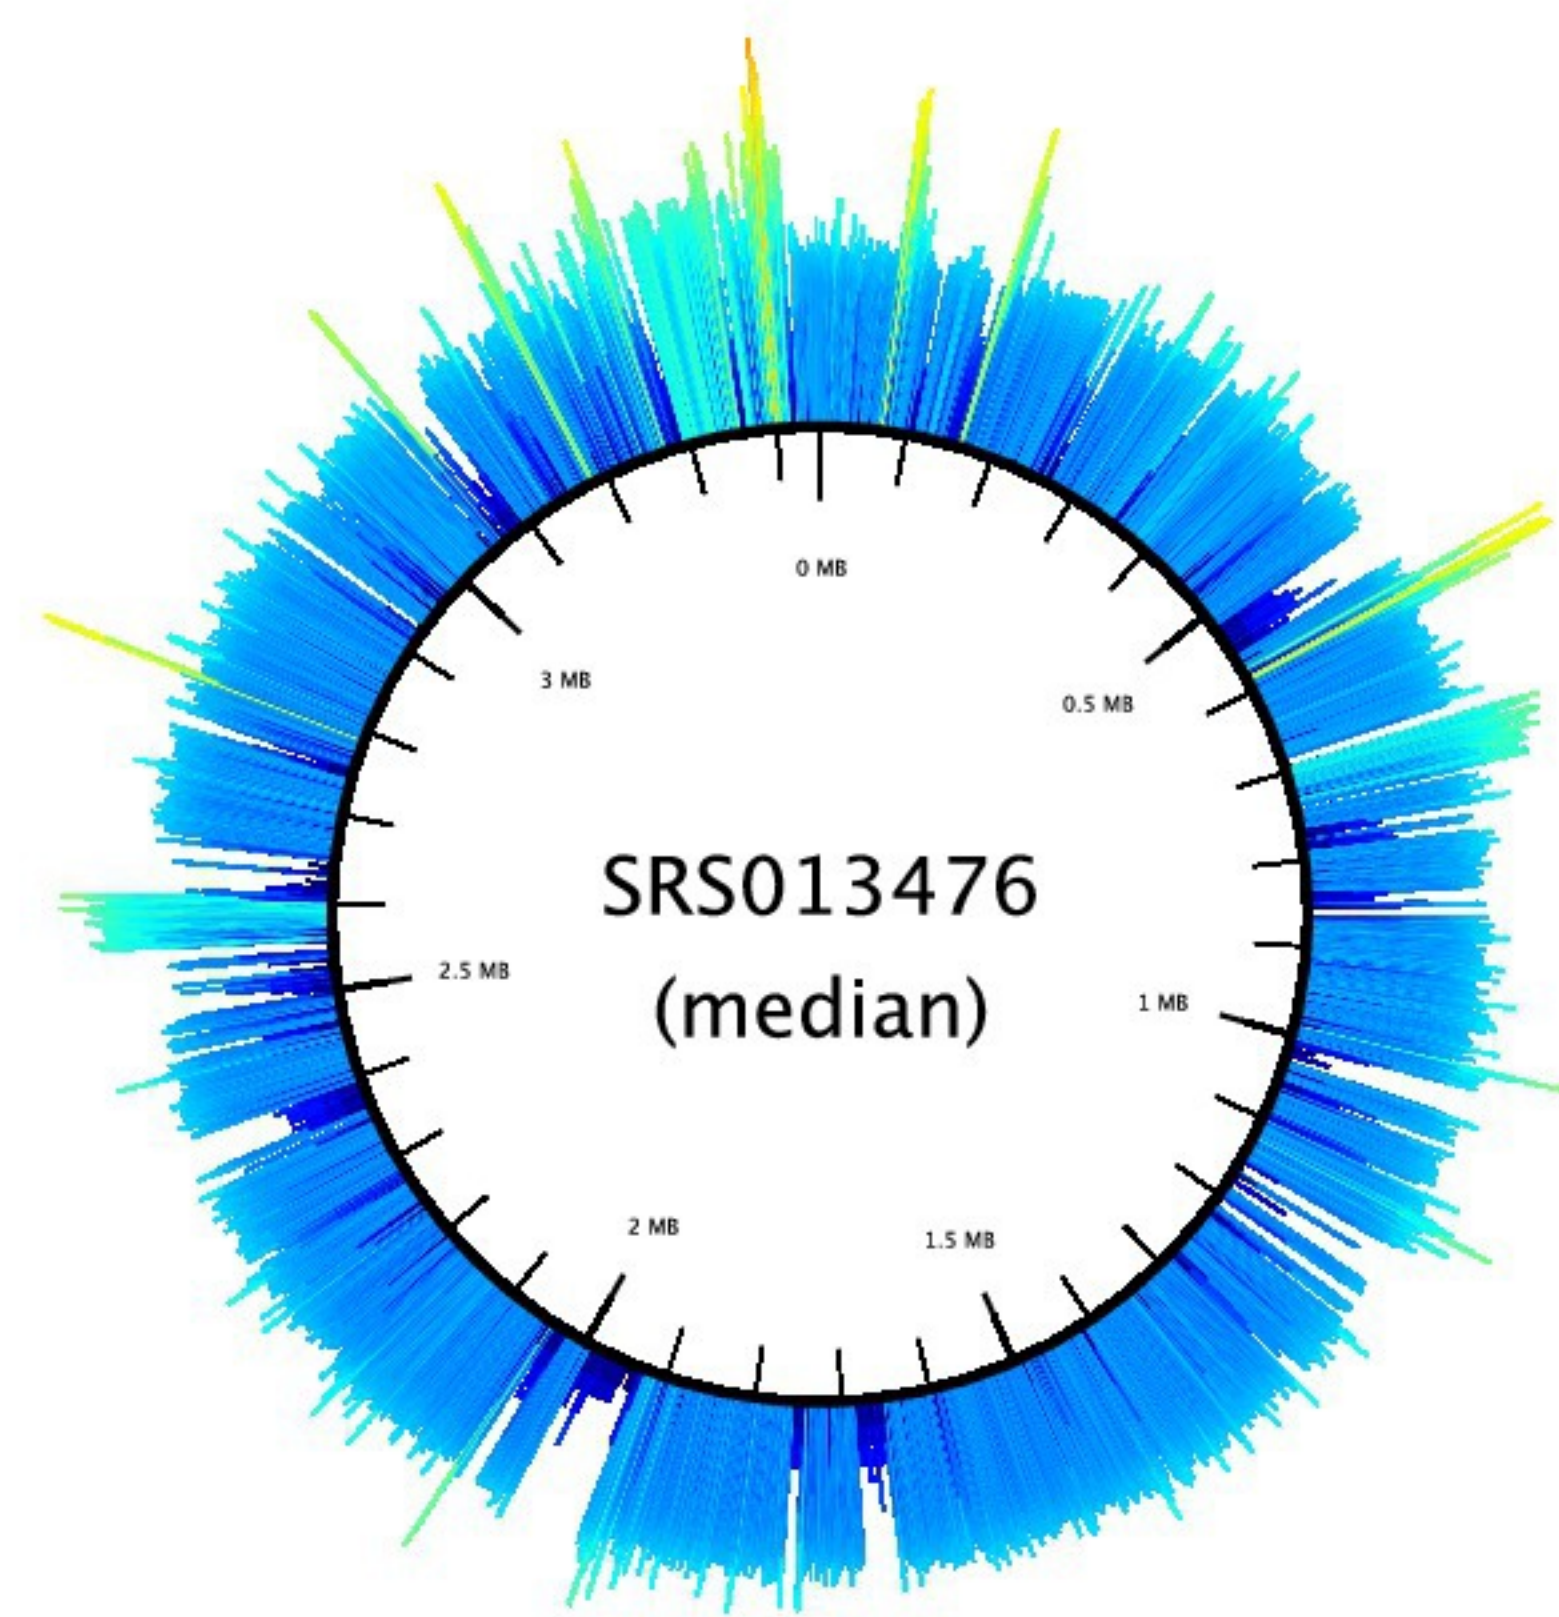

# *Eubacterium siraeum* DSM 15702

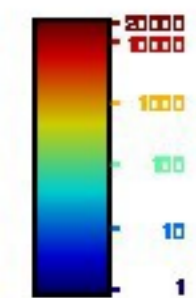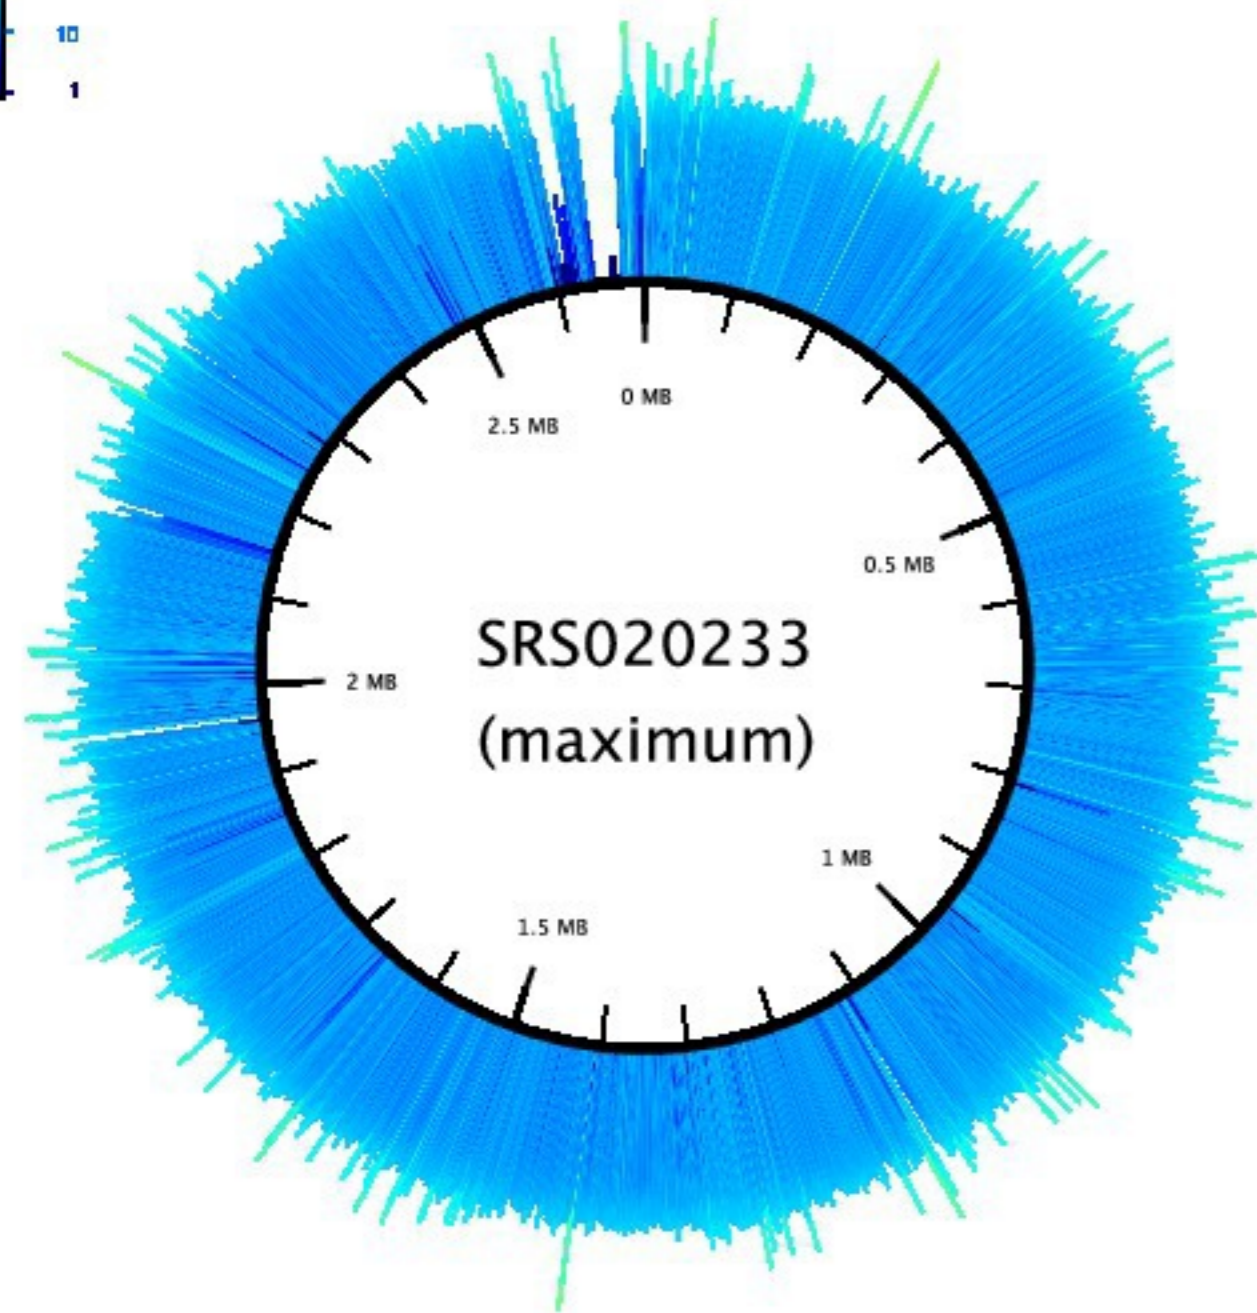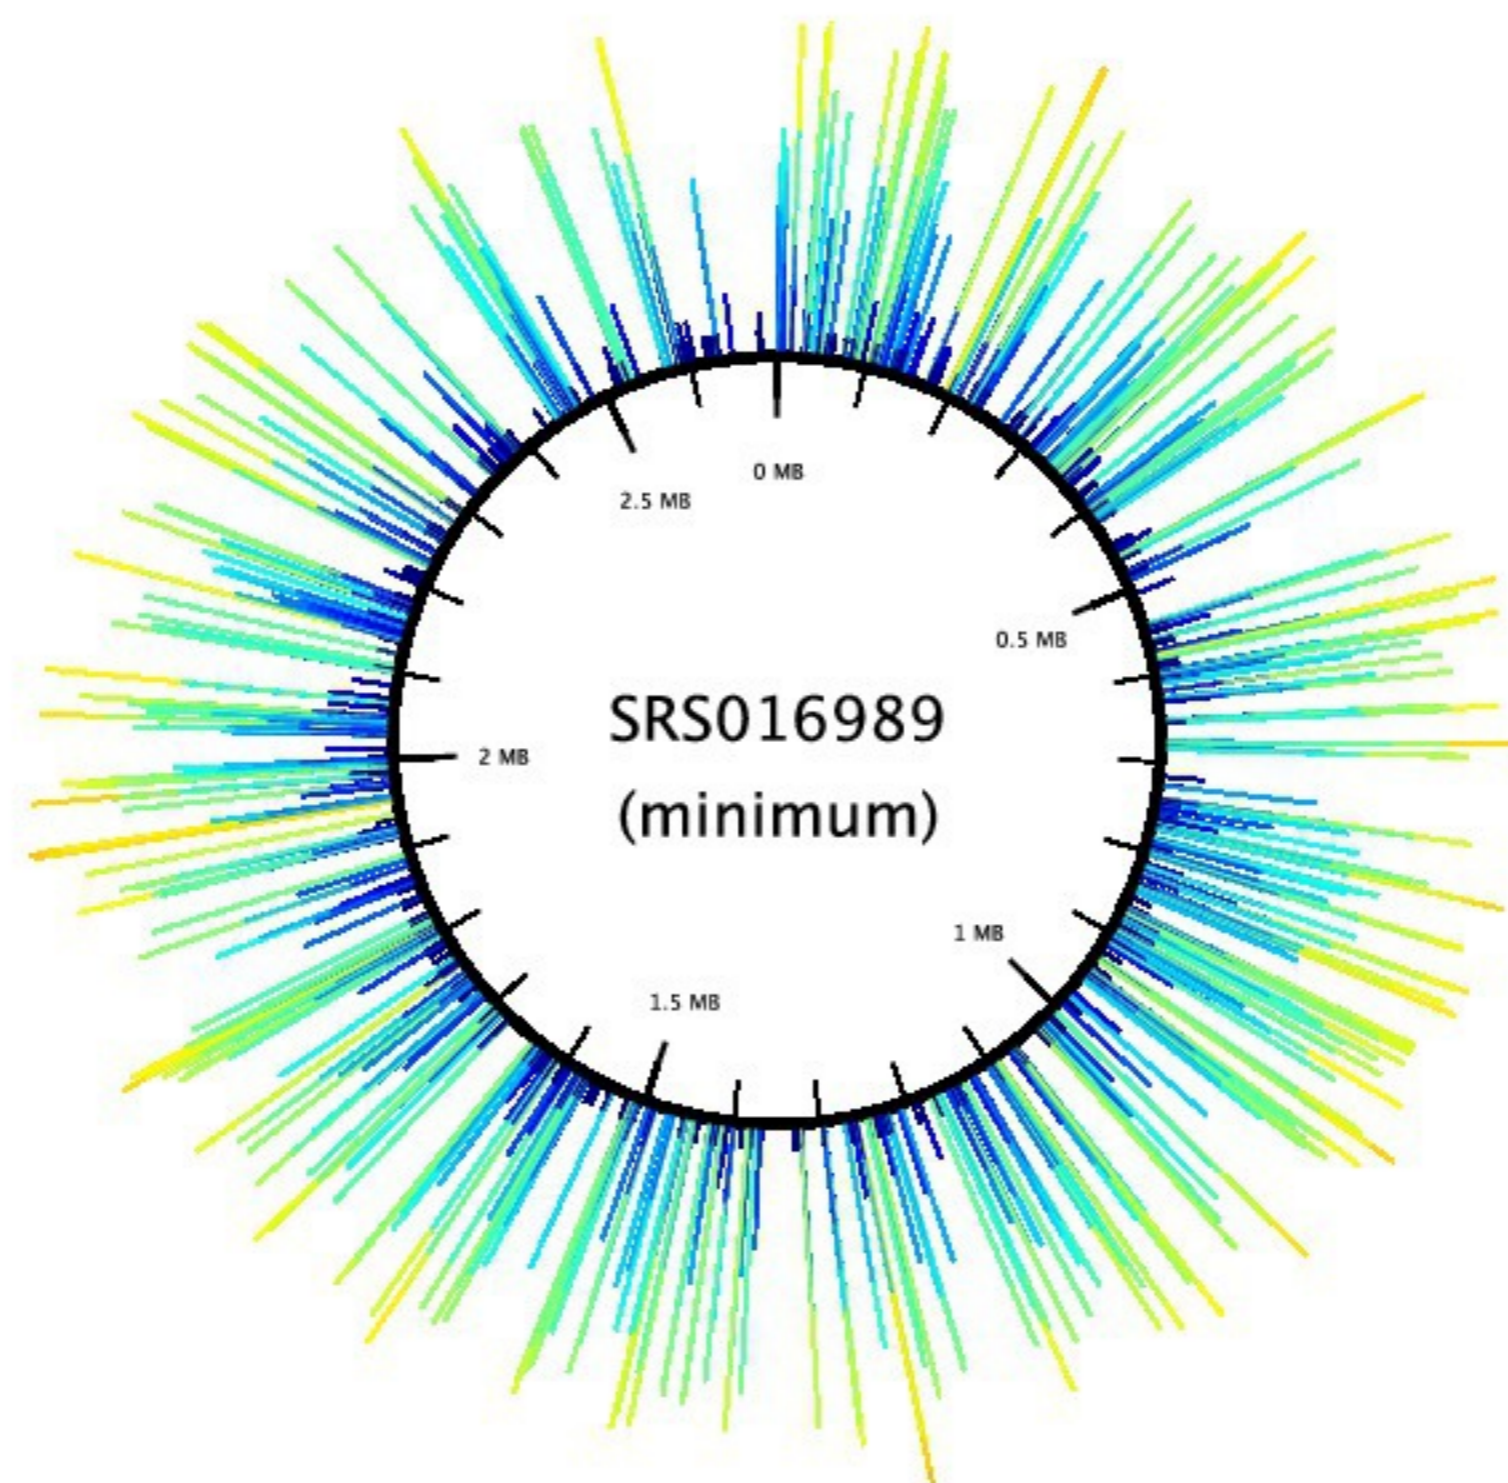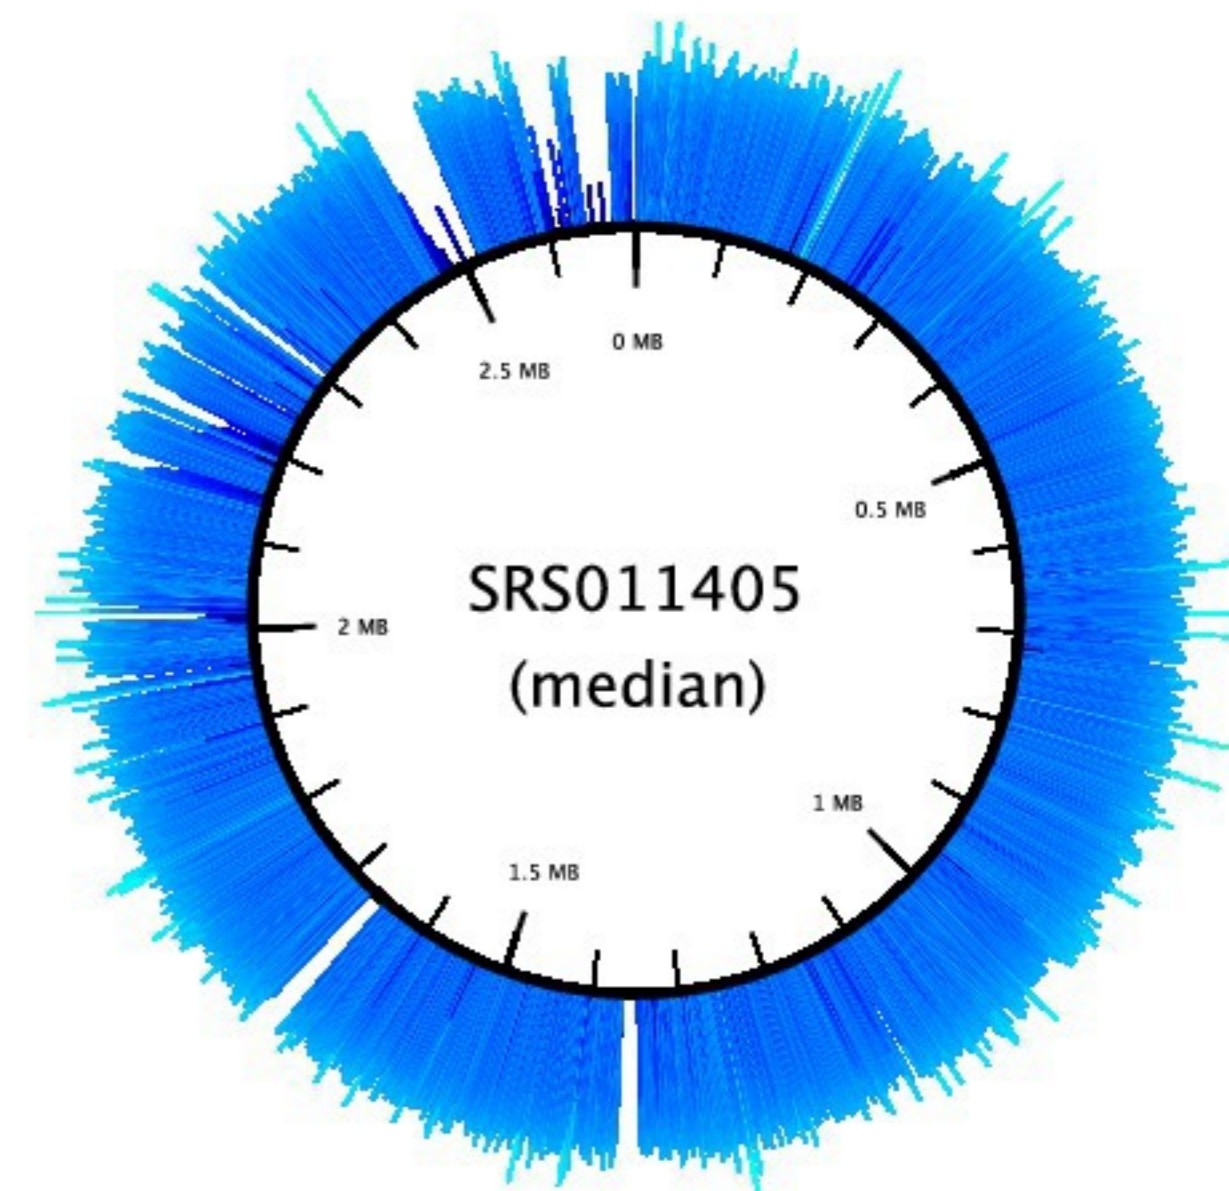

# *Faecalibacterium prausnitzii* M21/2

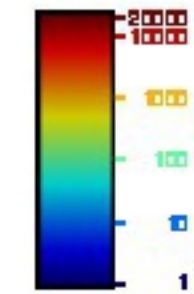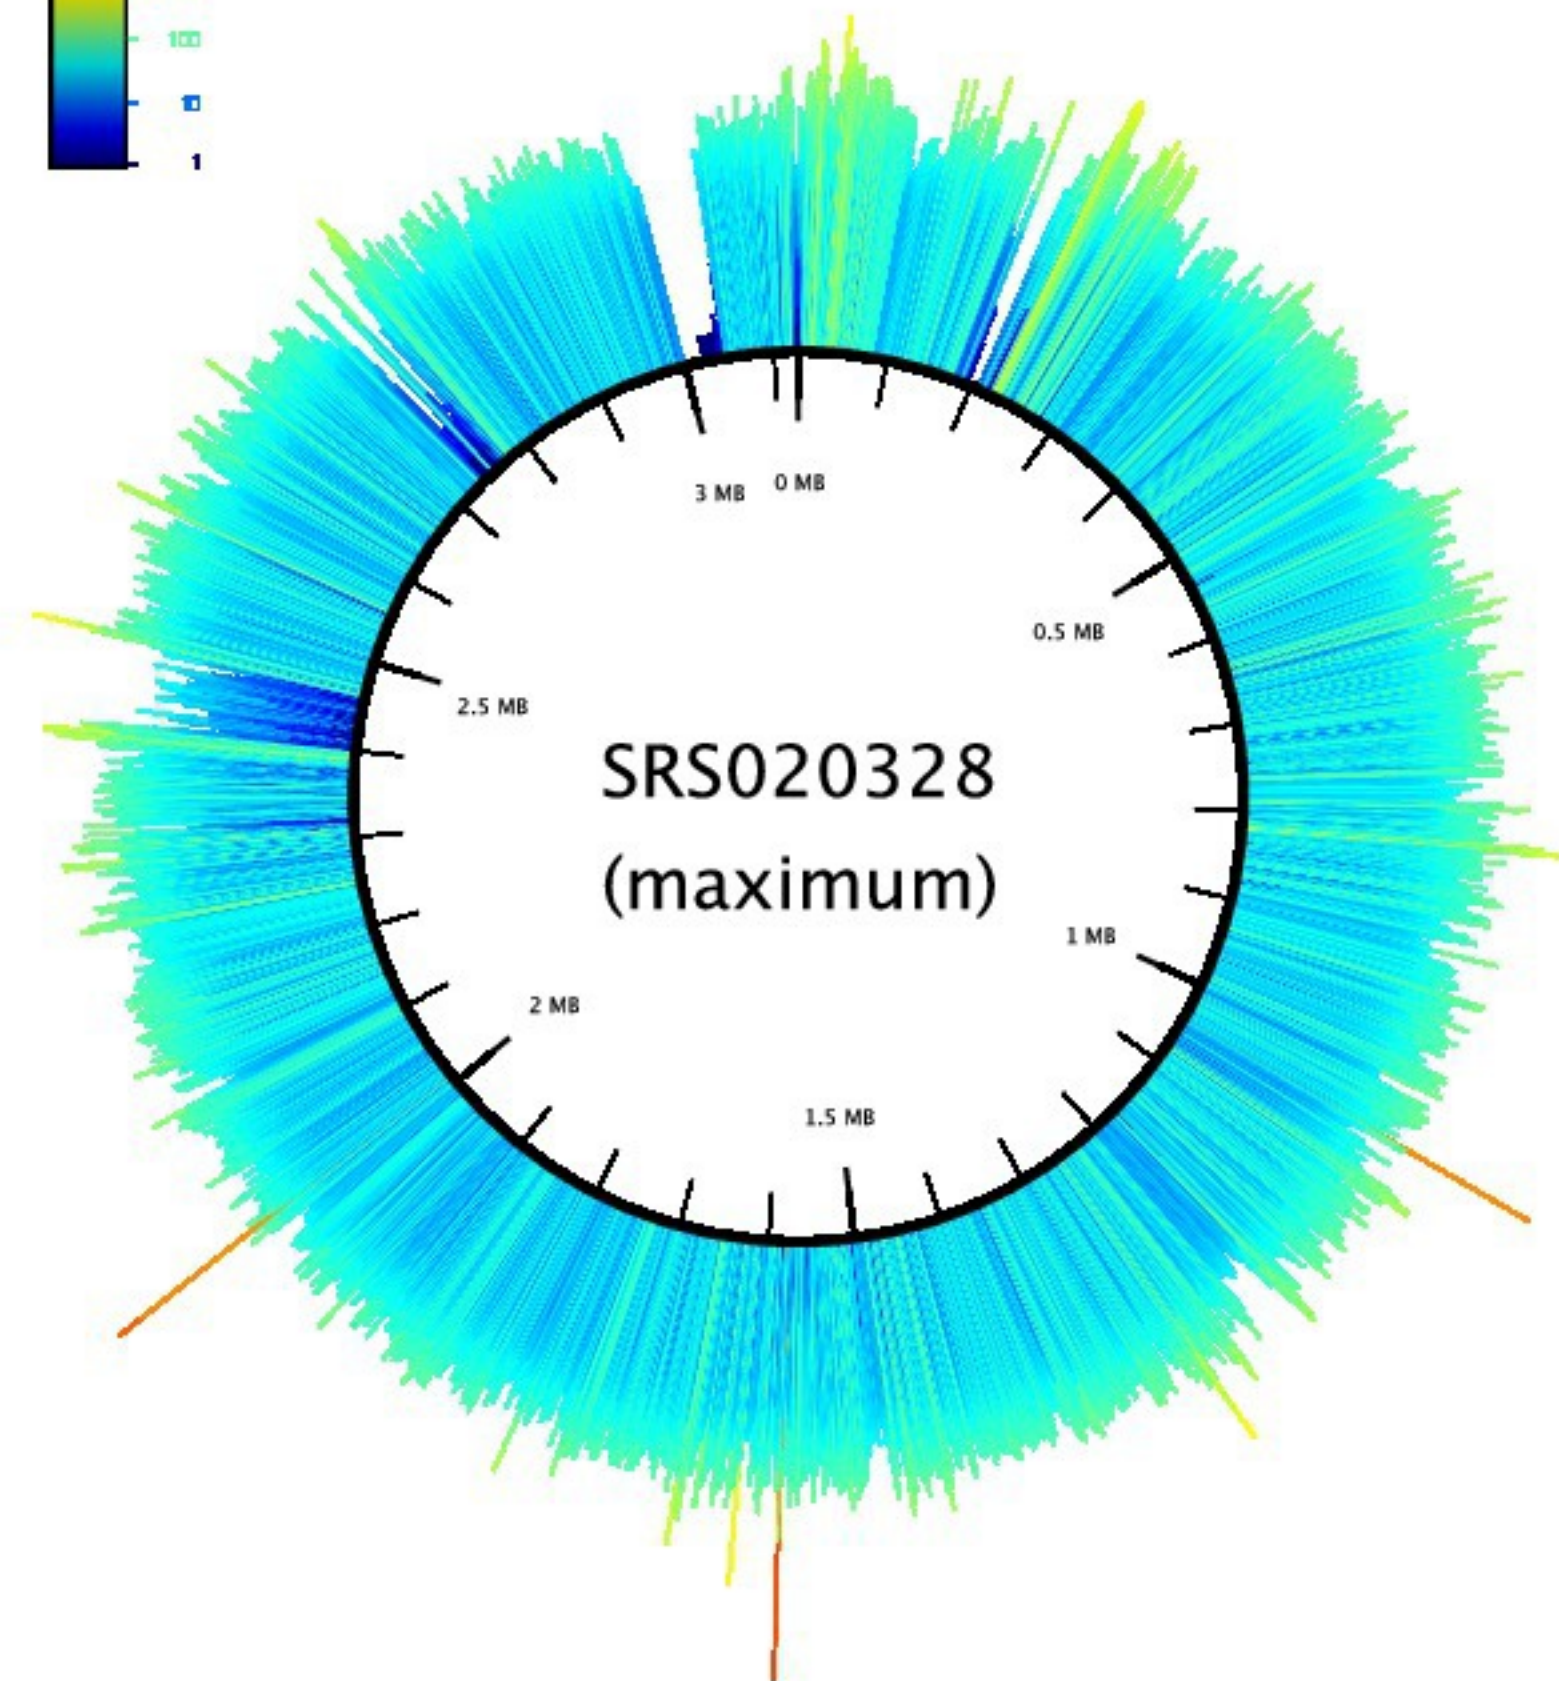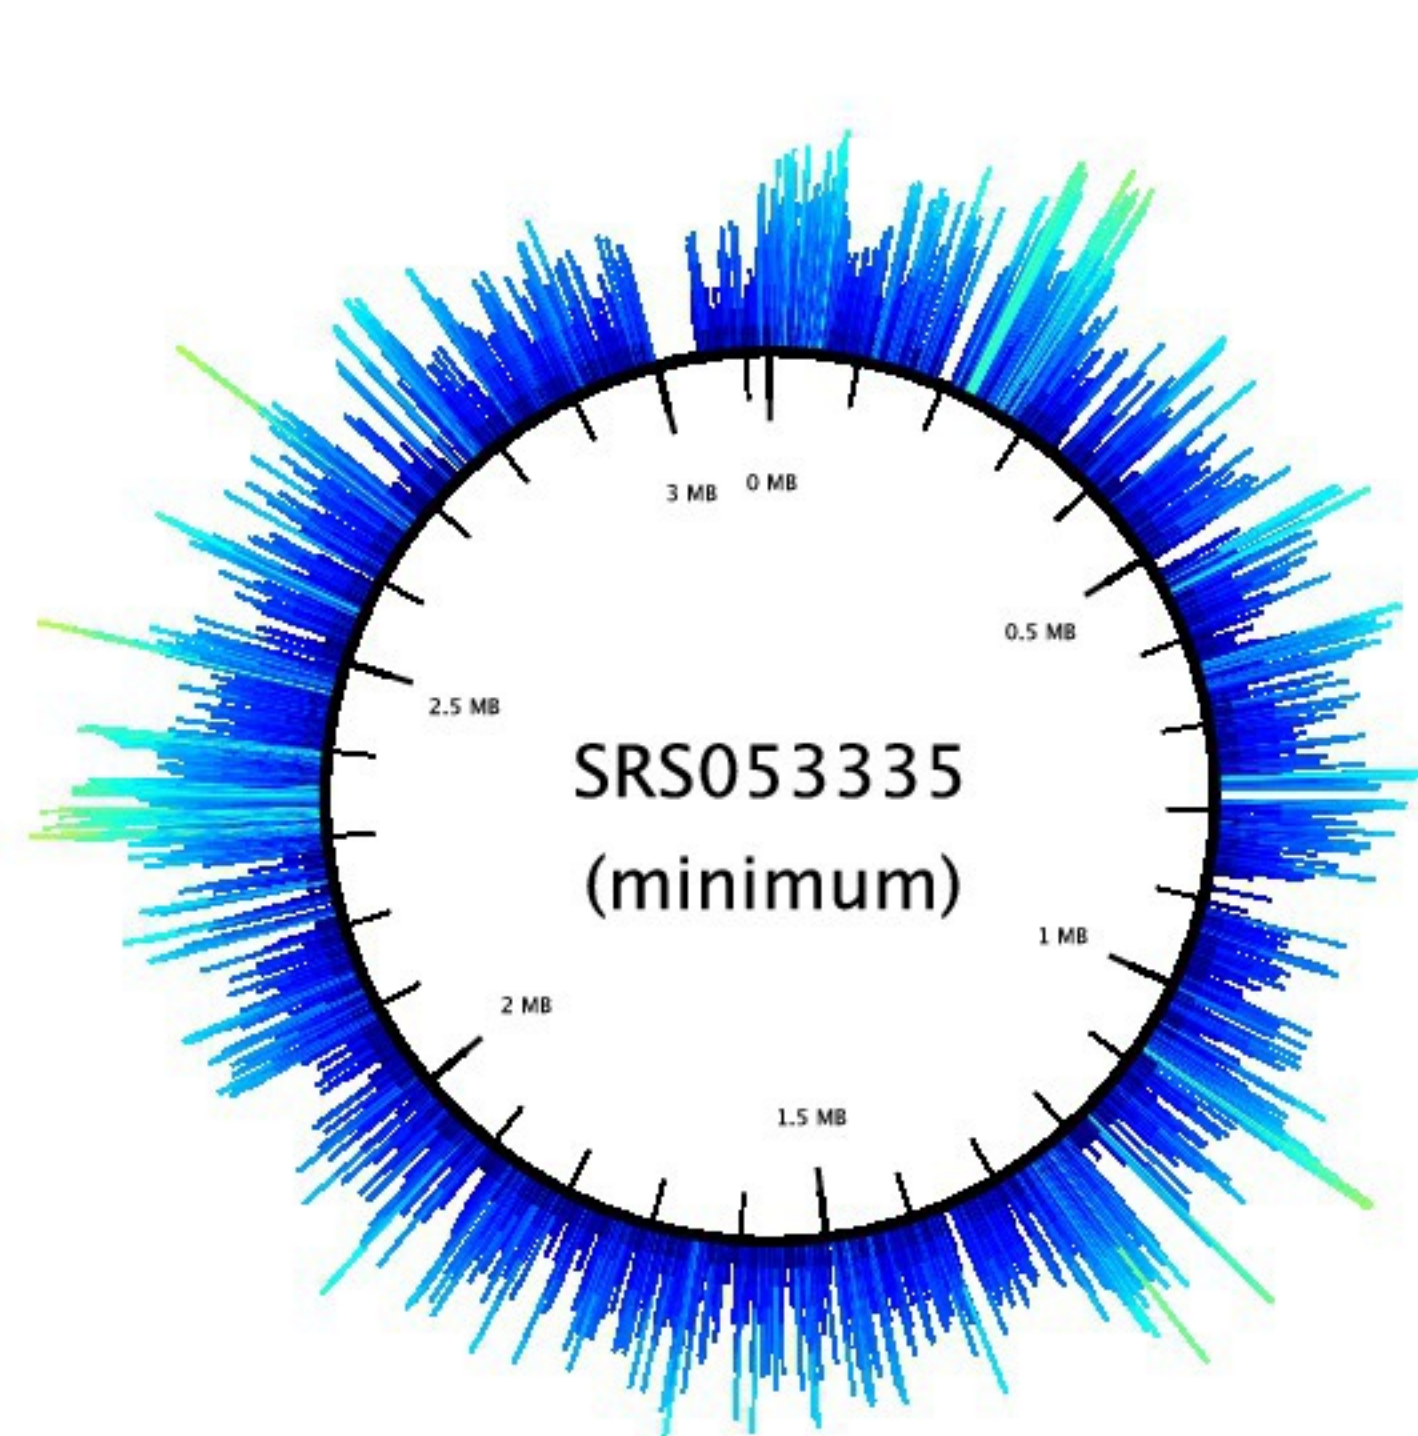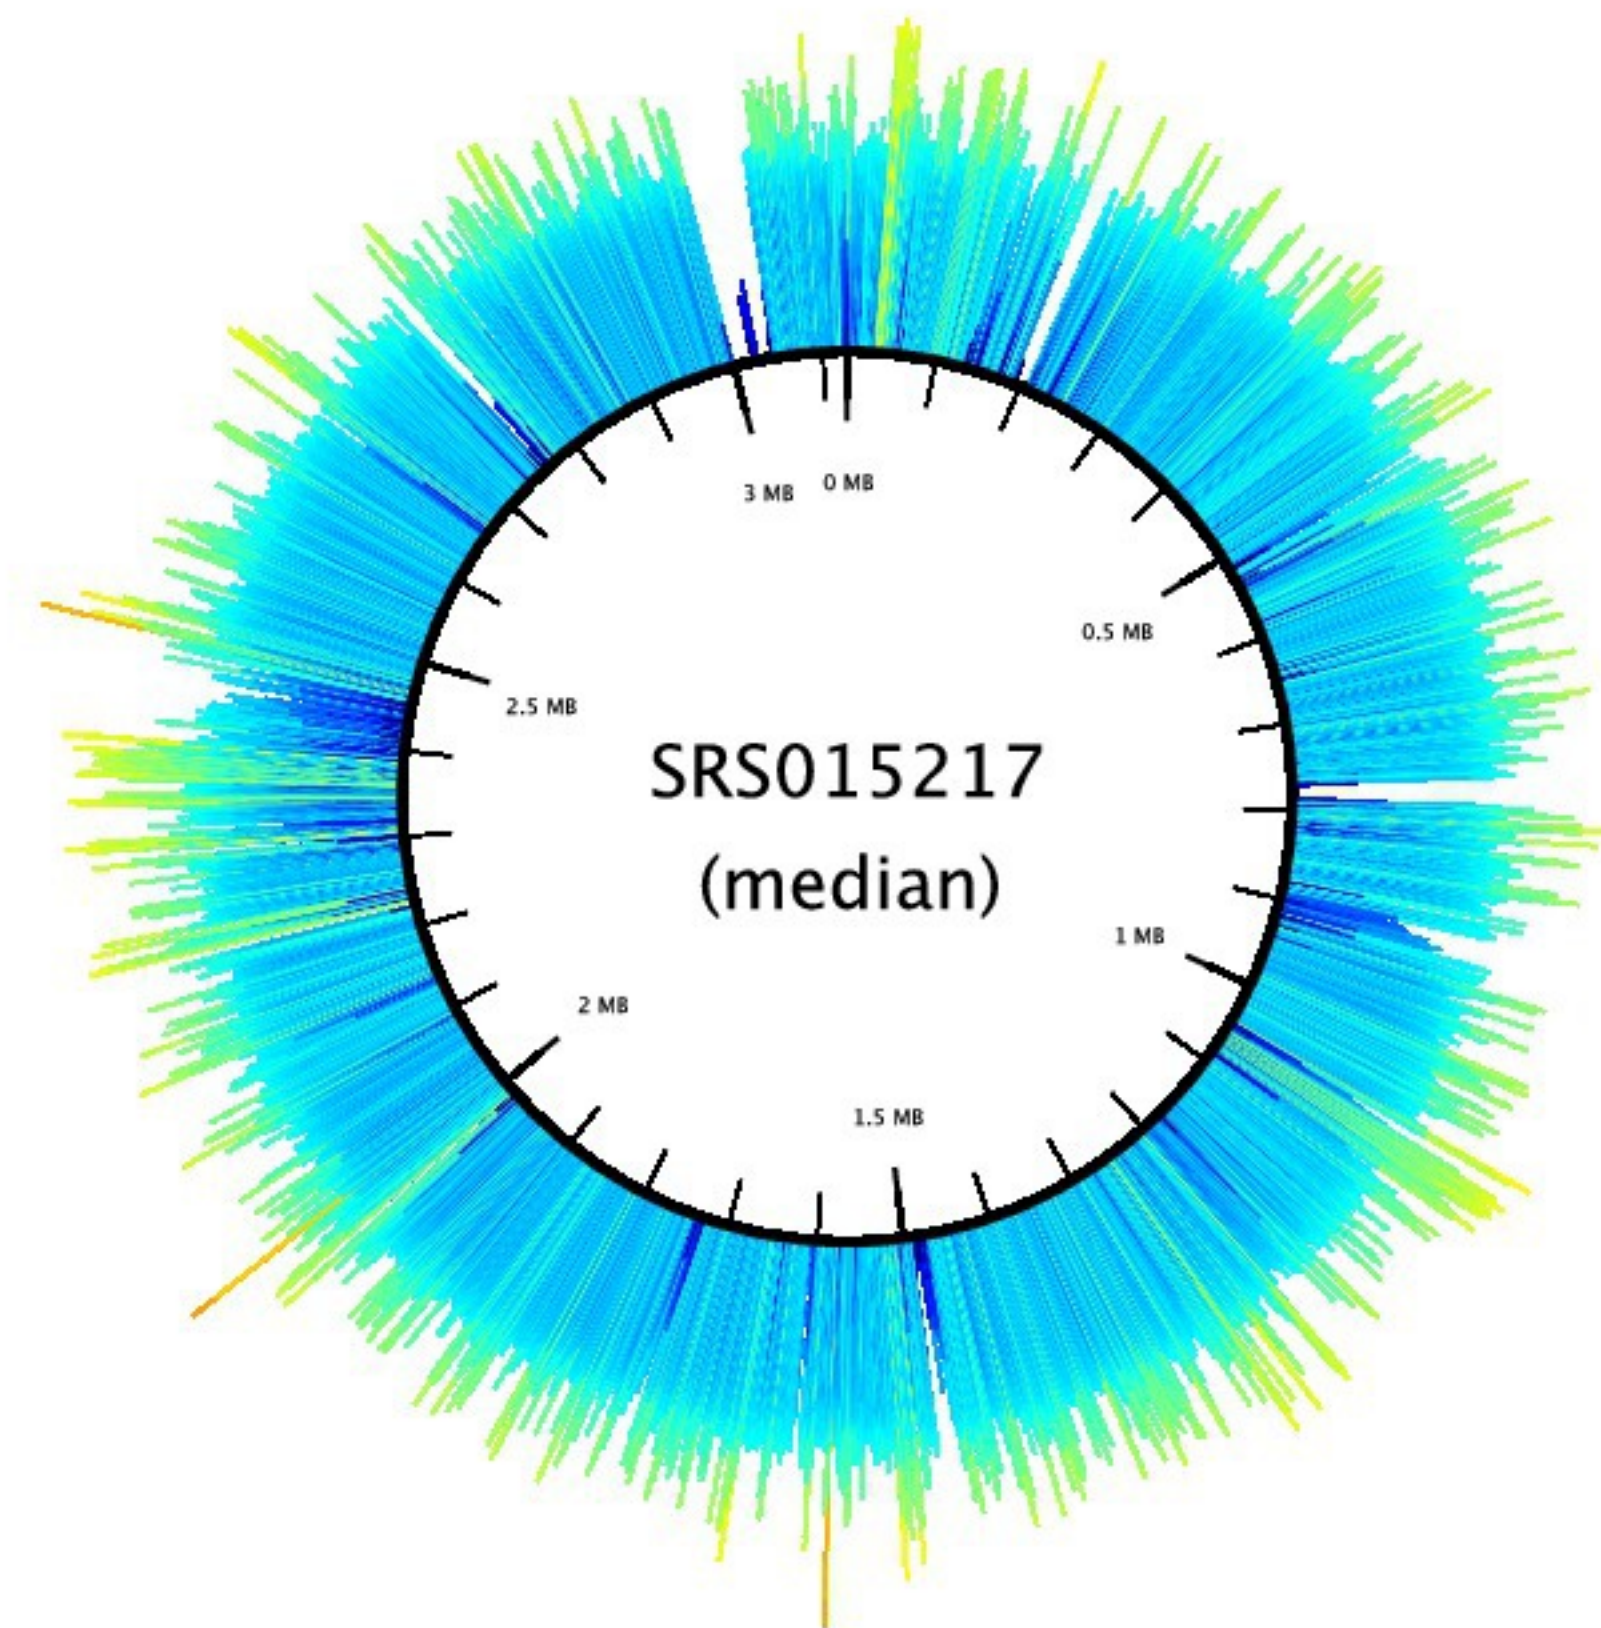



*Parabacteroides merdae* ATCC 43184

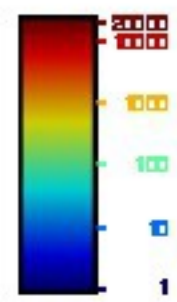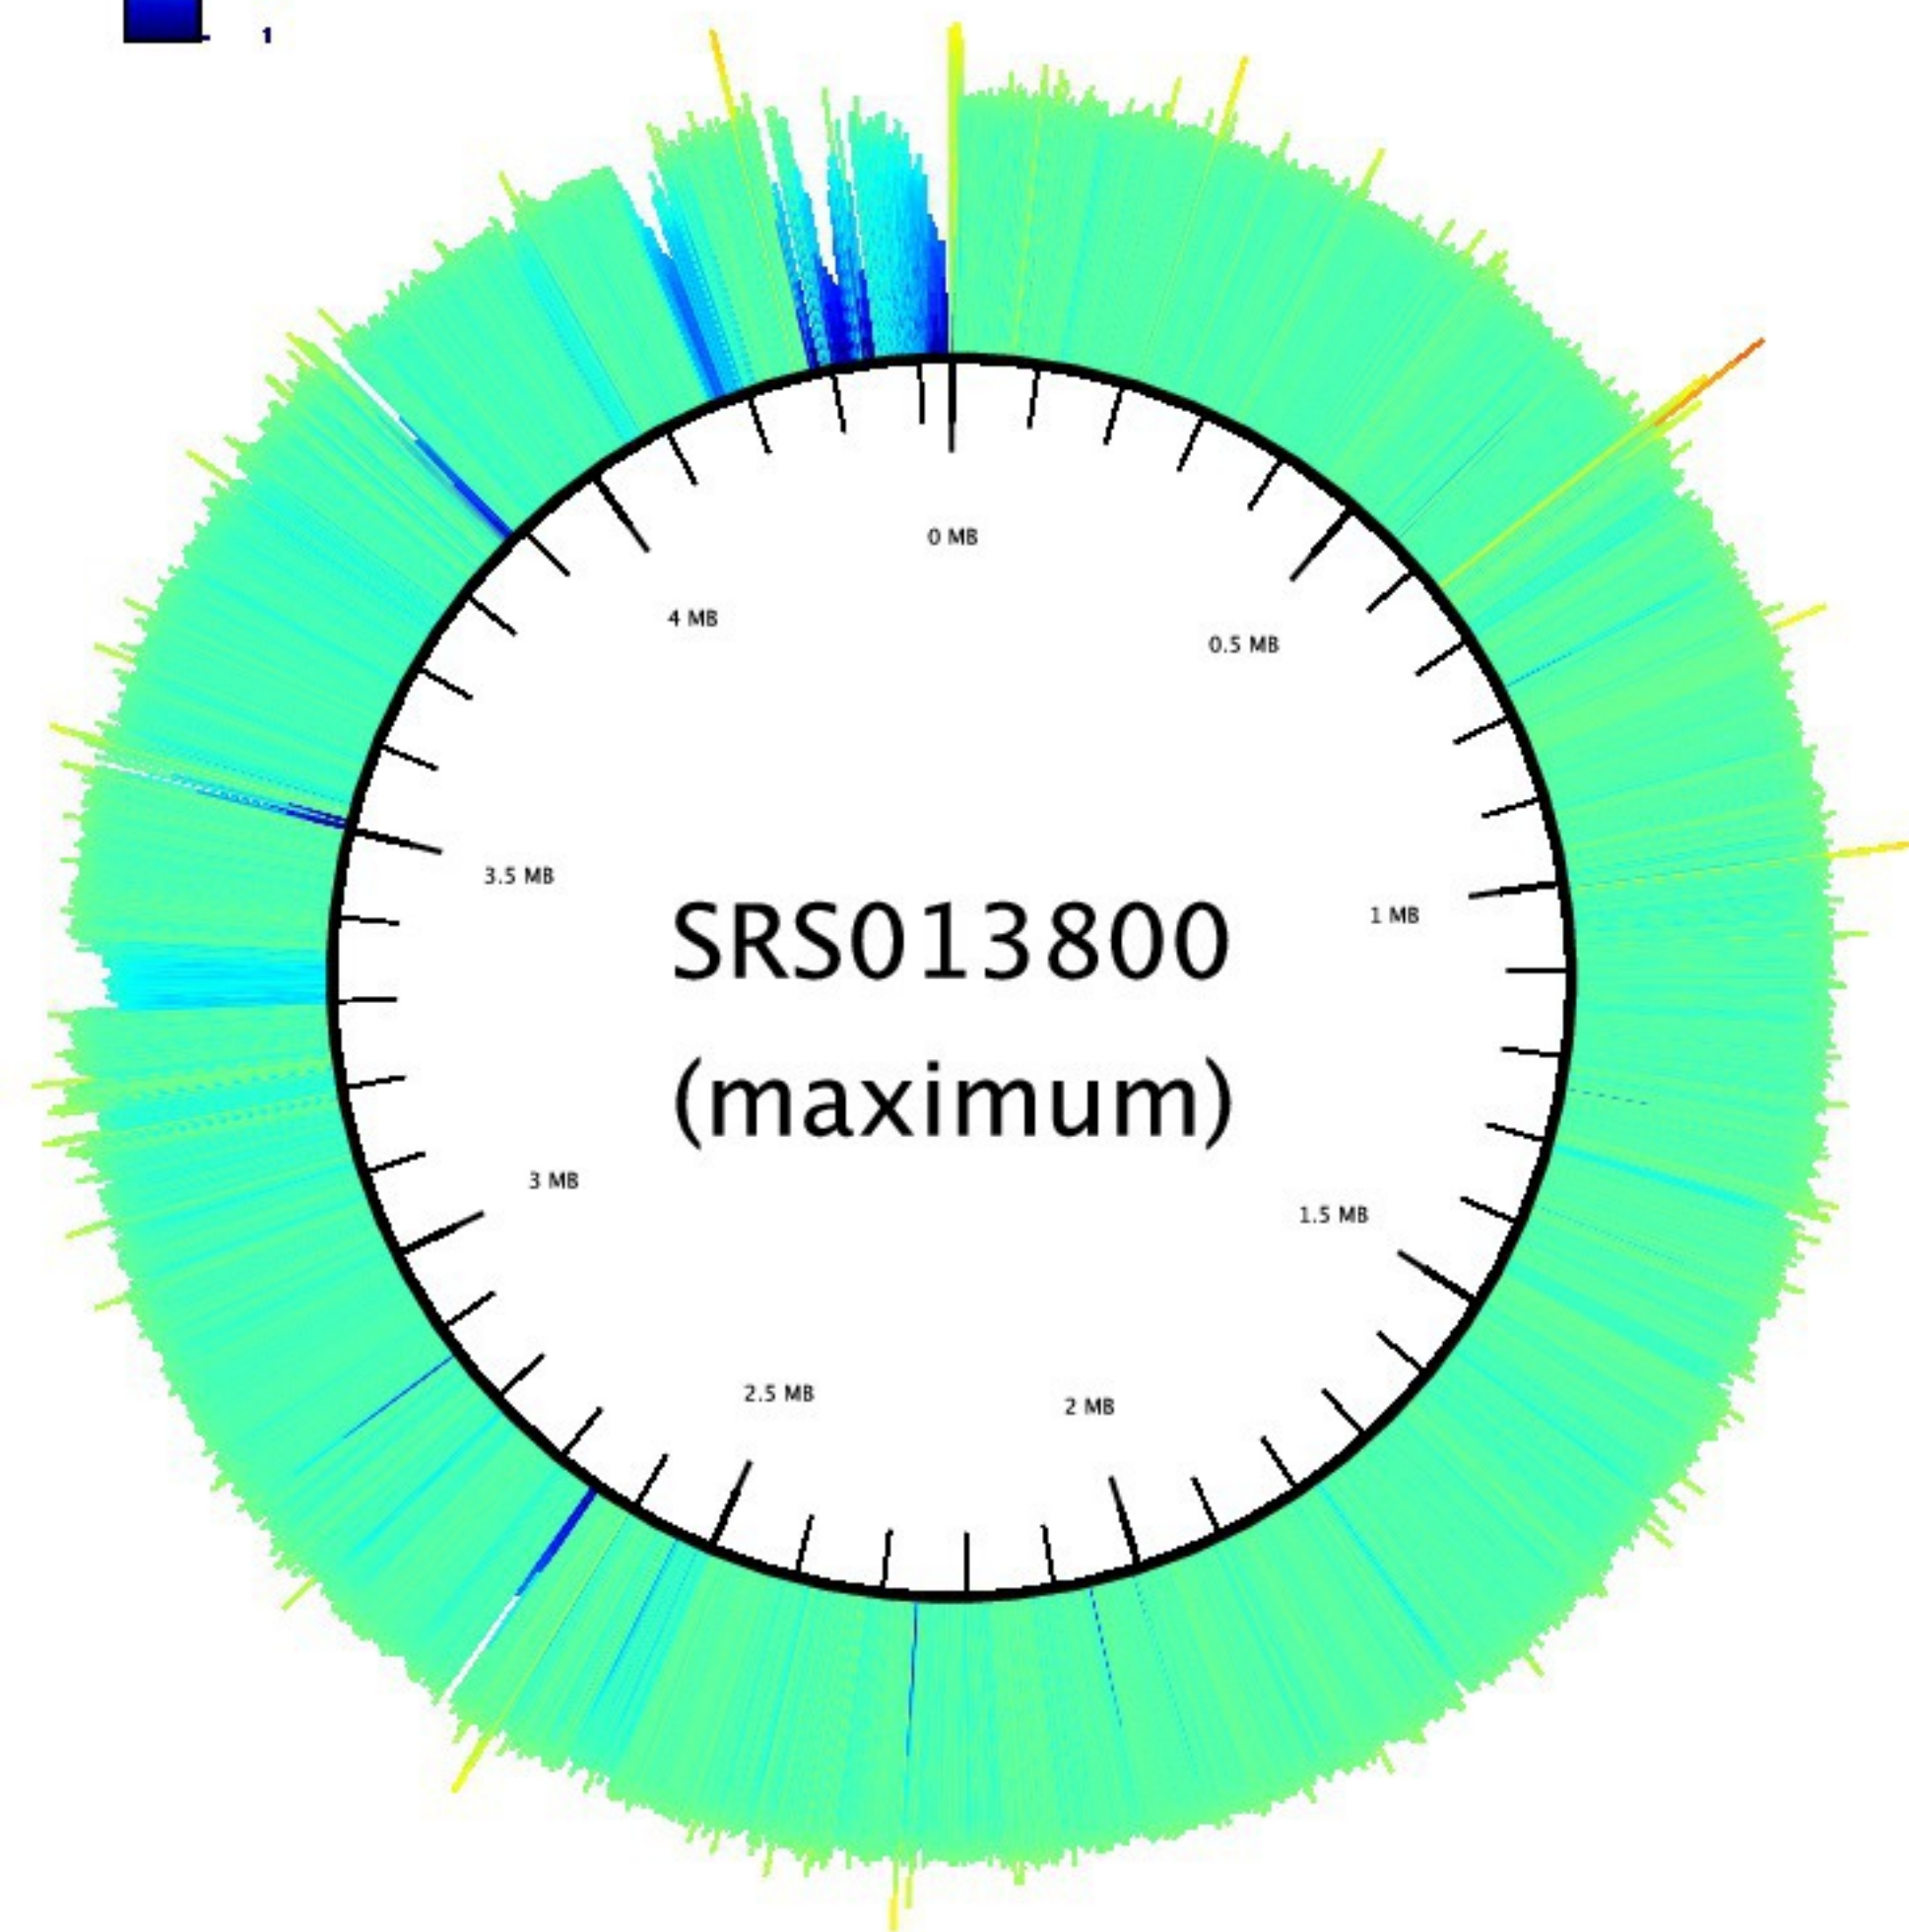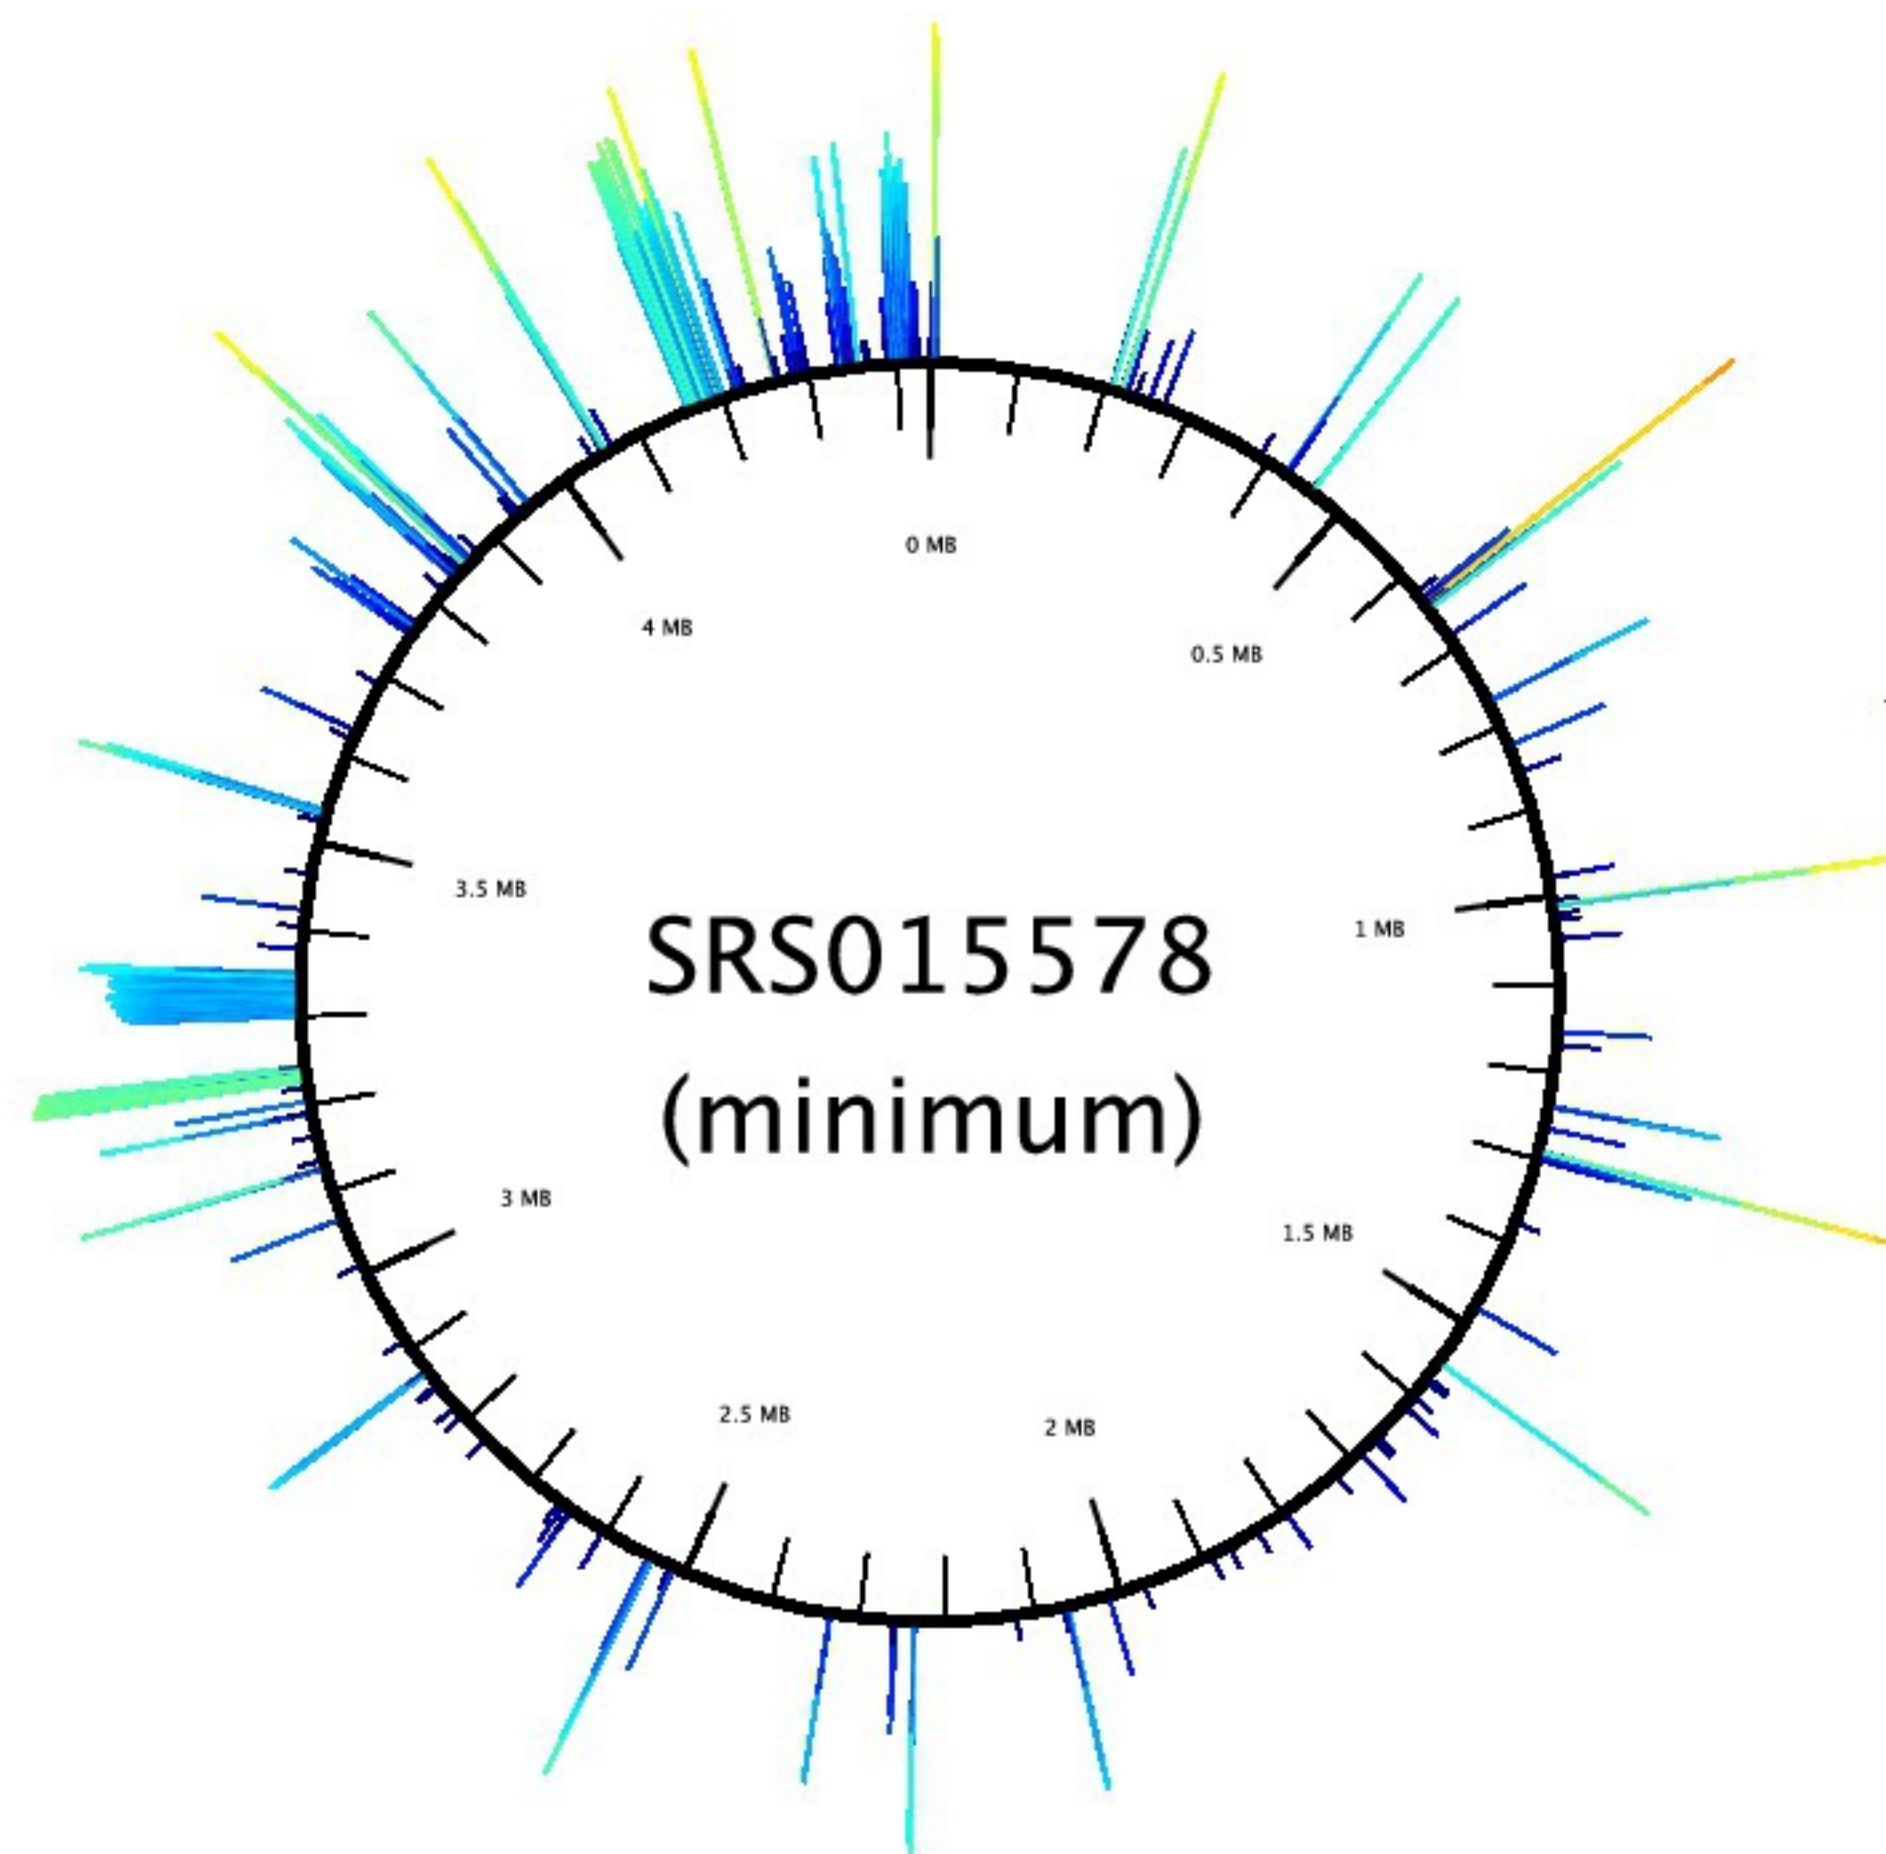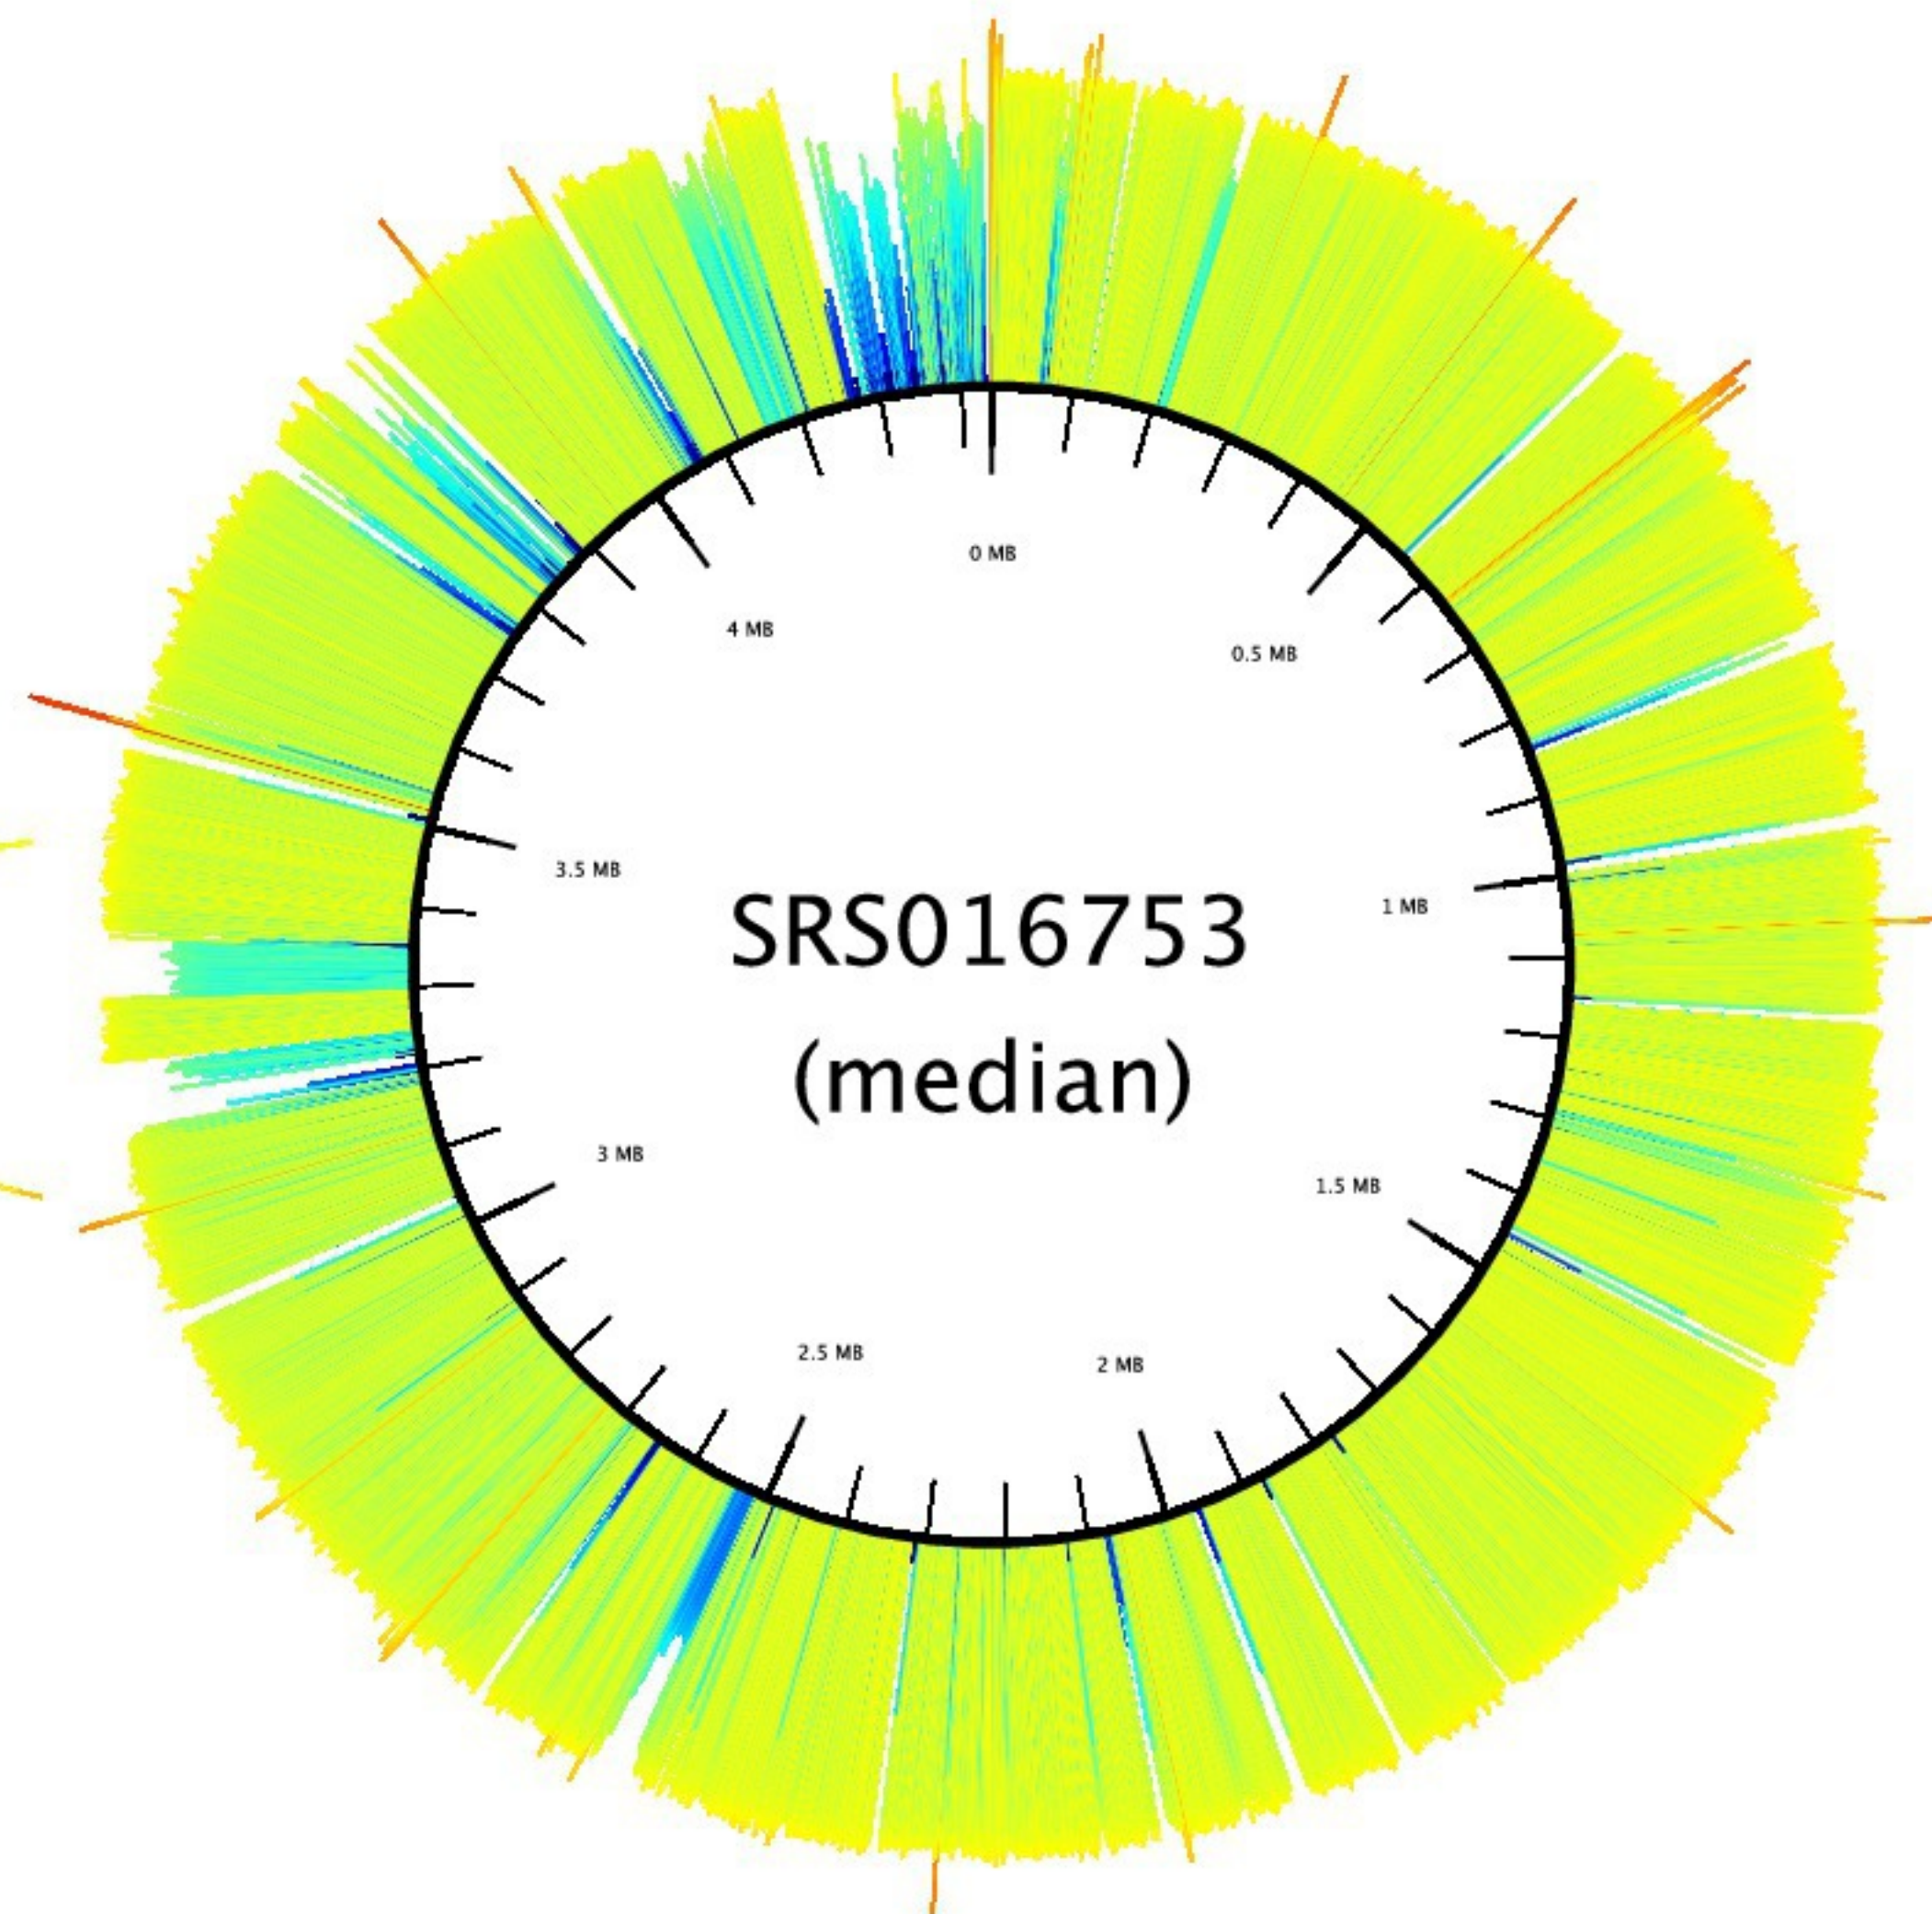

# *Prevotella copri* DSM 18205

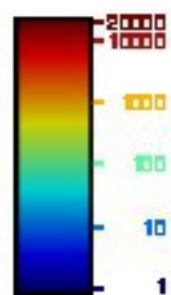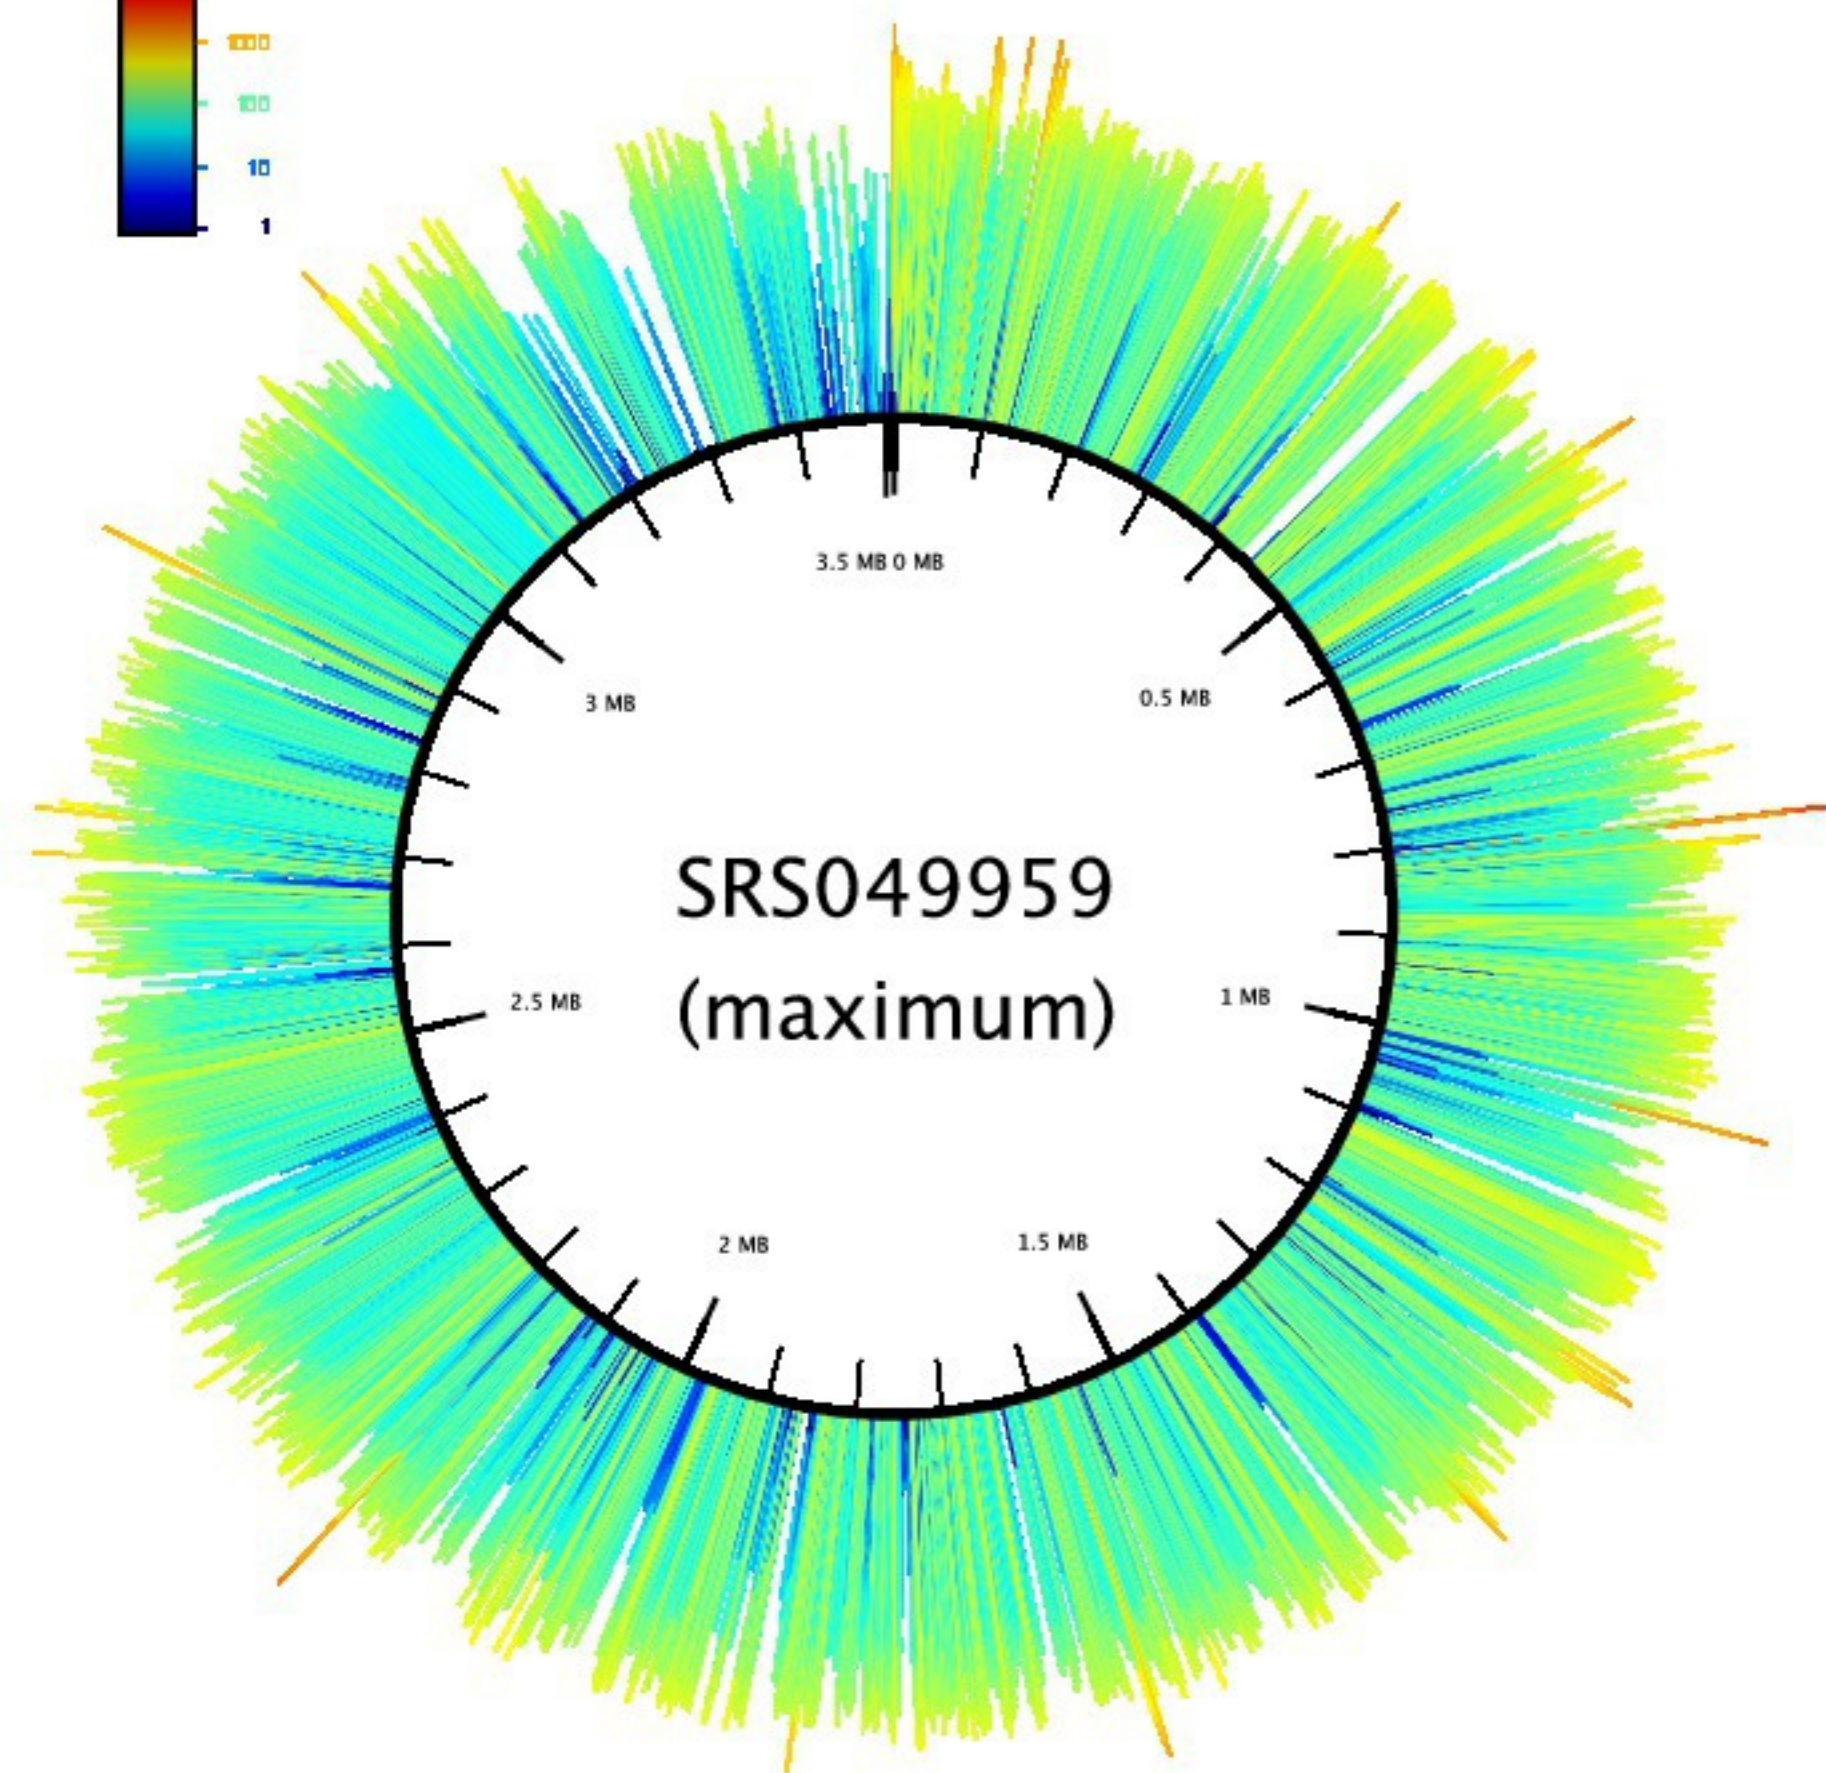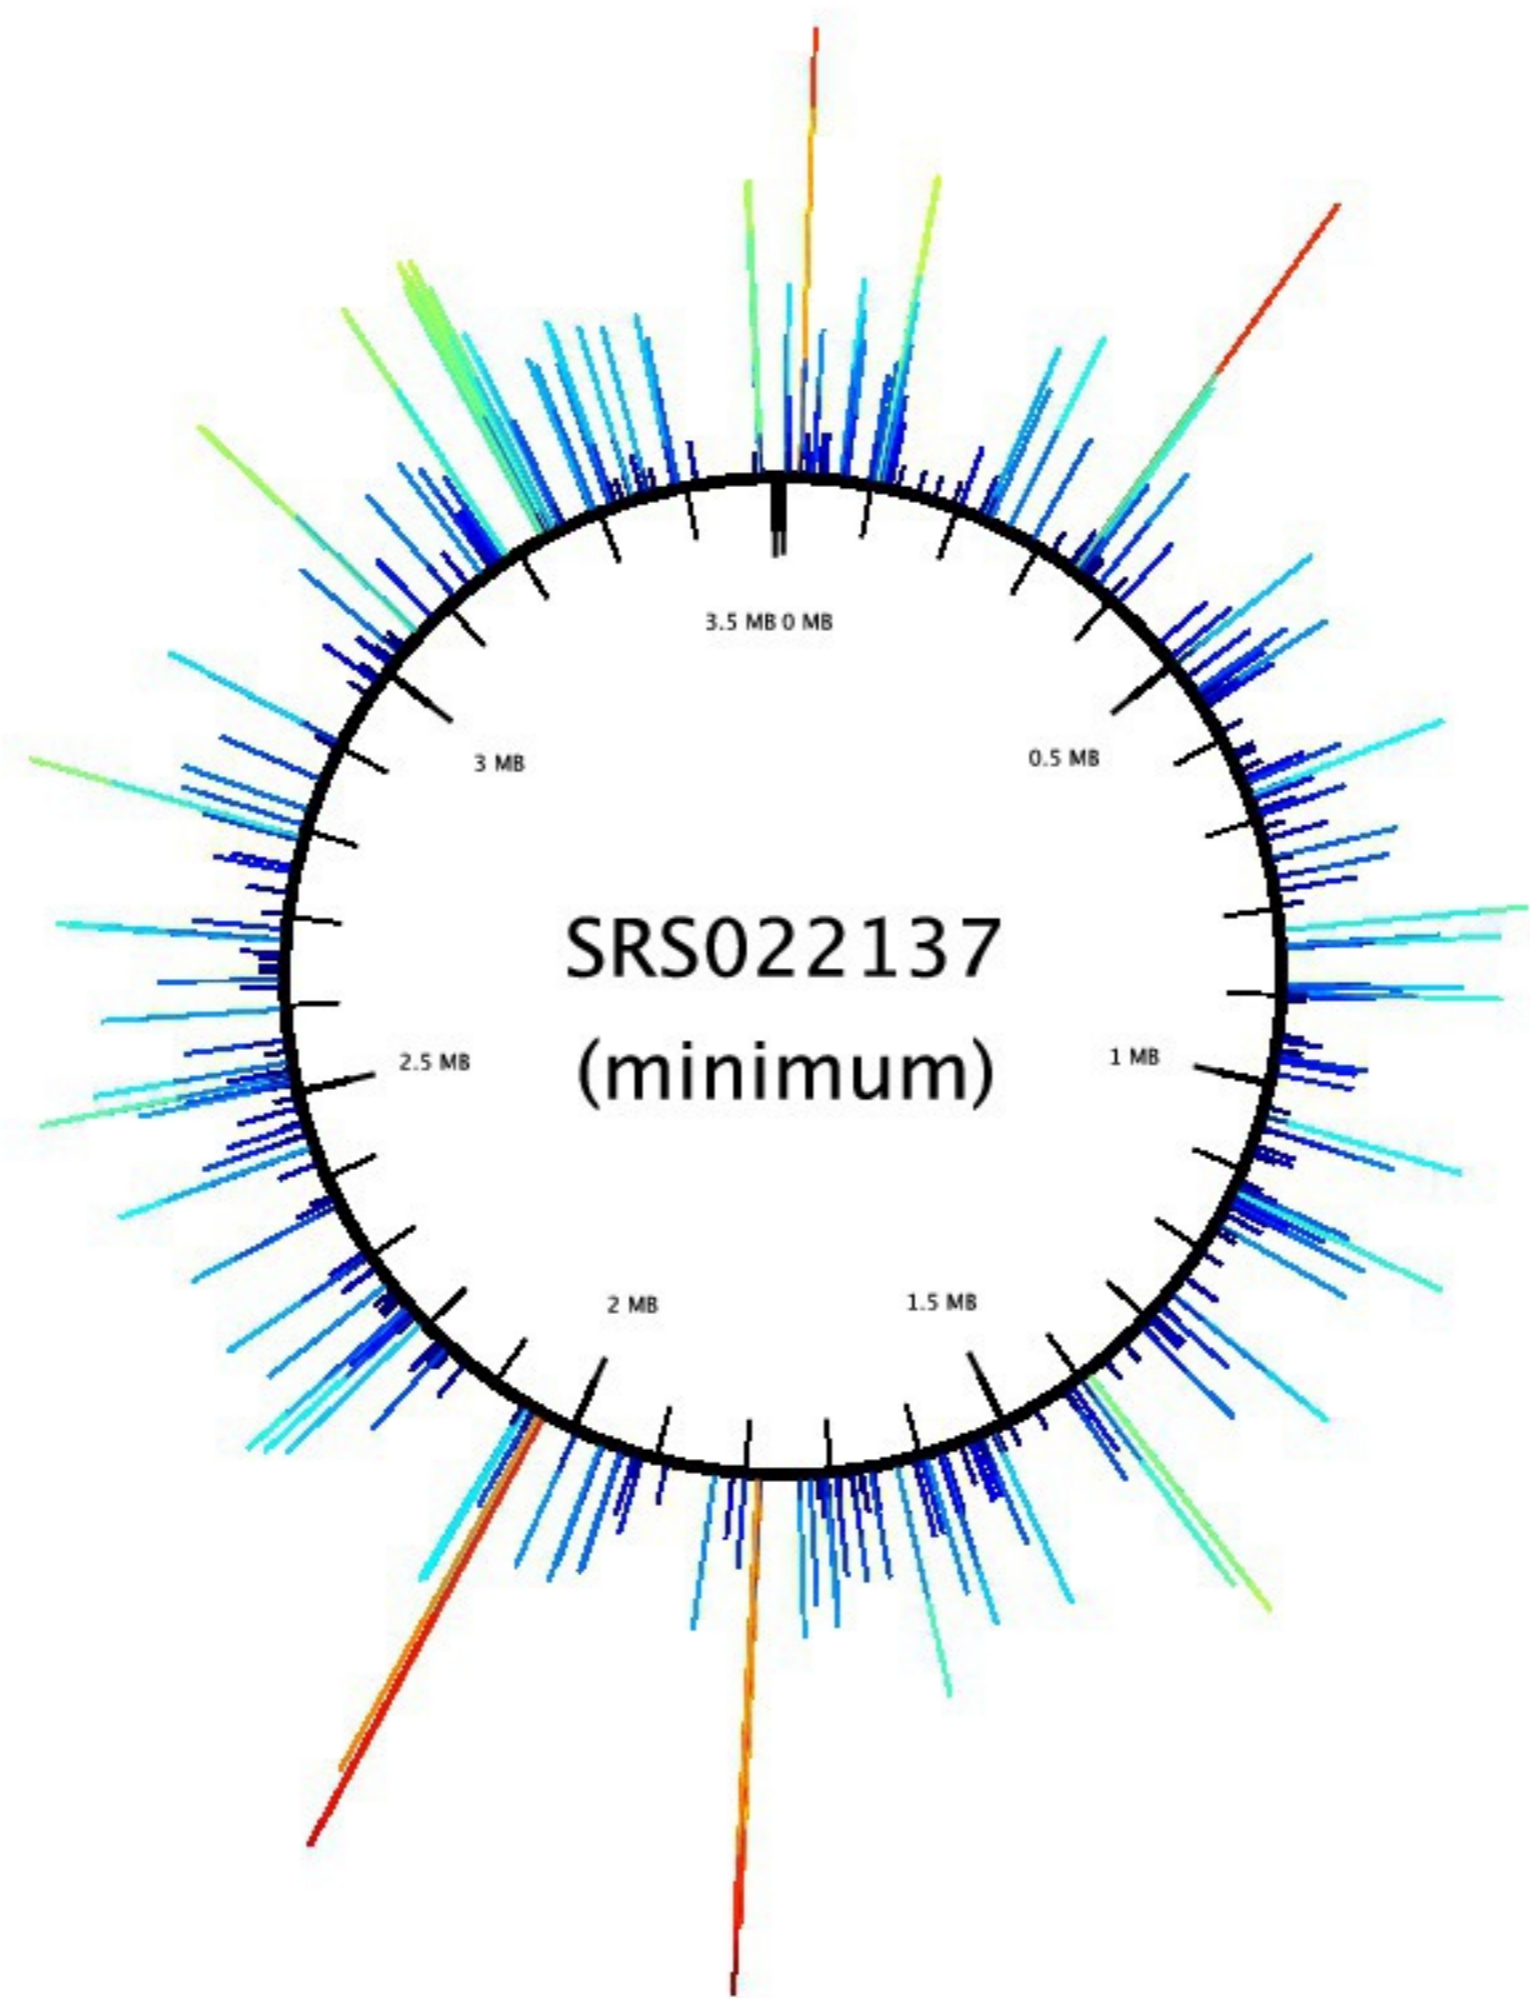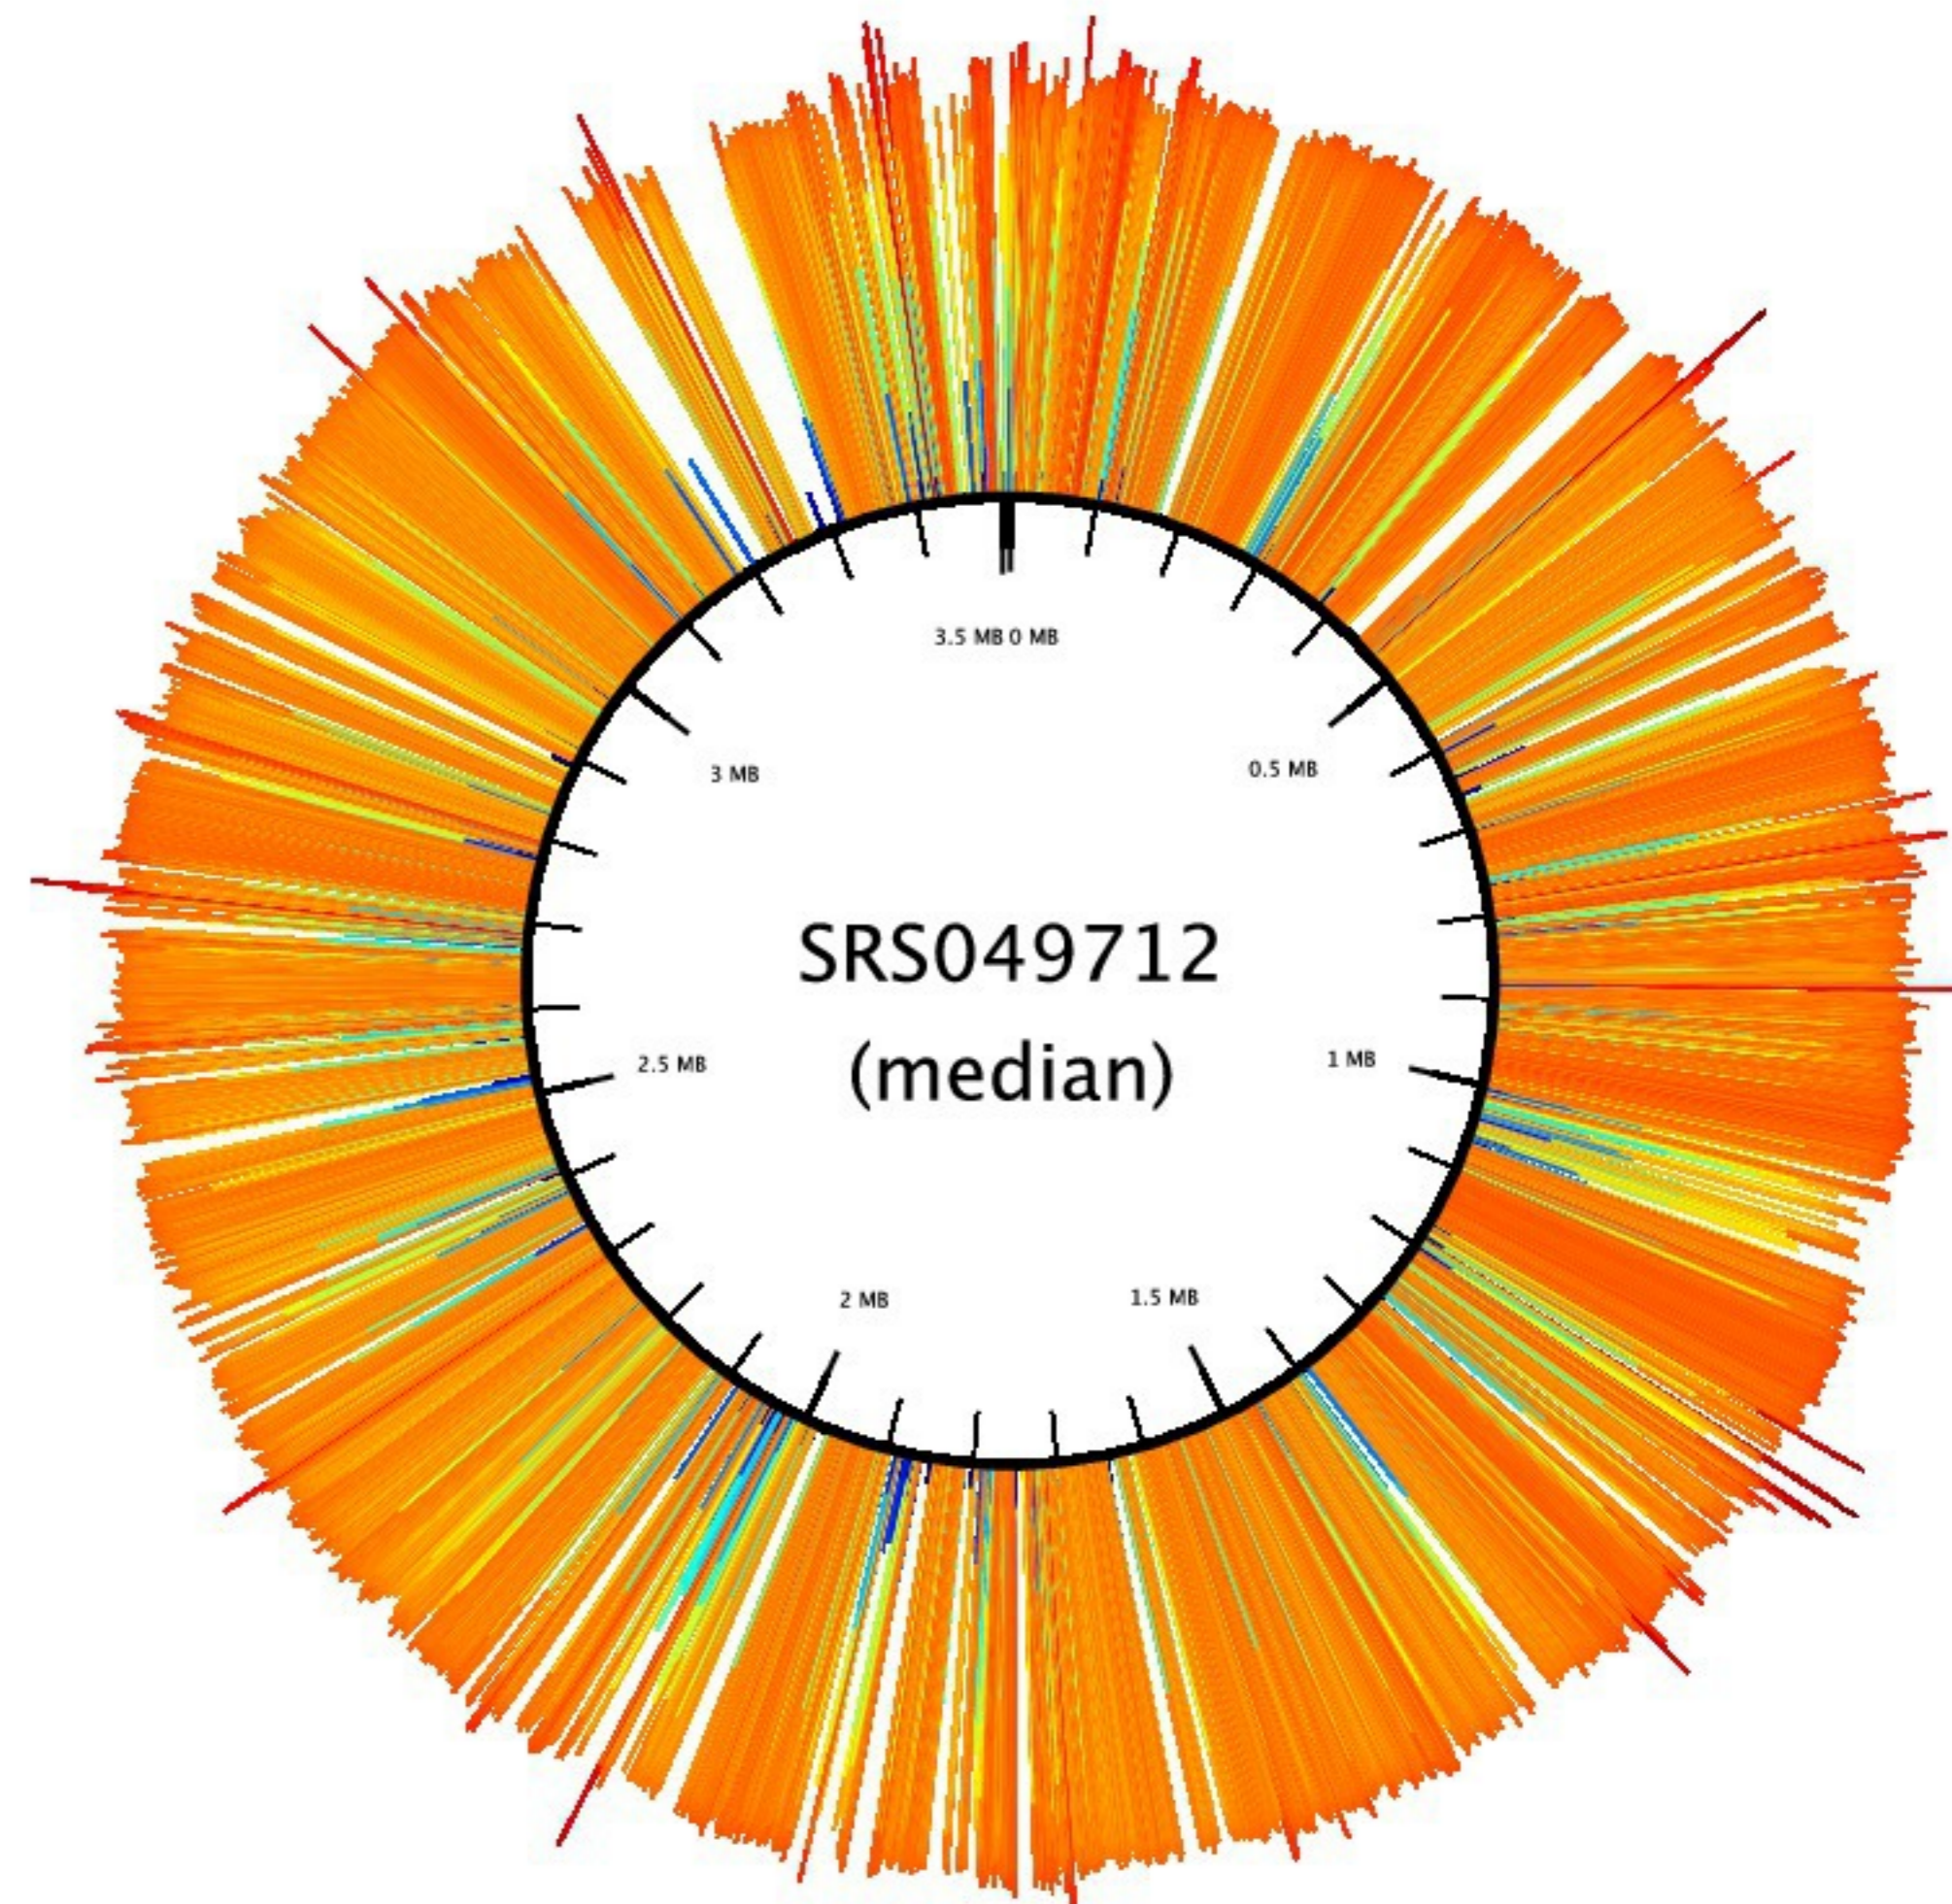

# *Prevotella melaninogenica* ATCC 25845

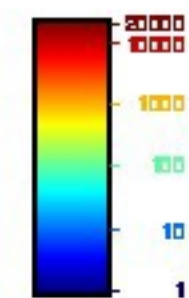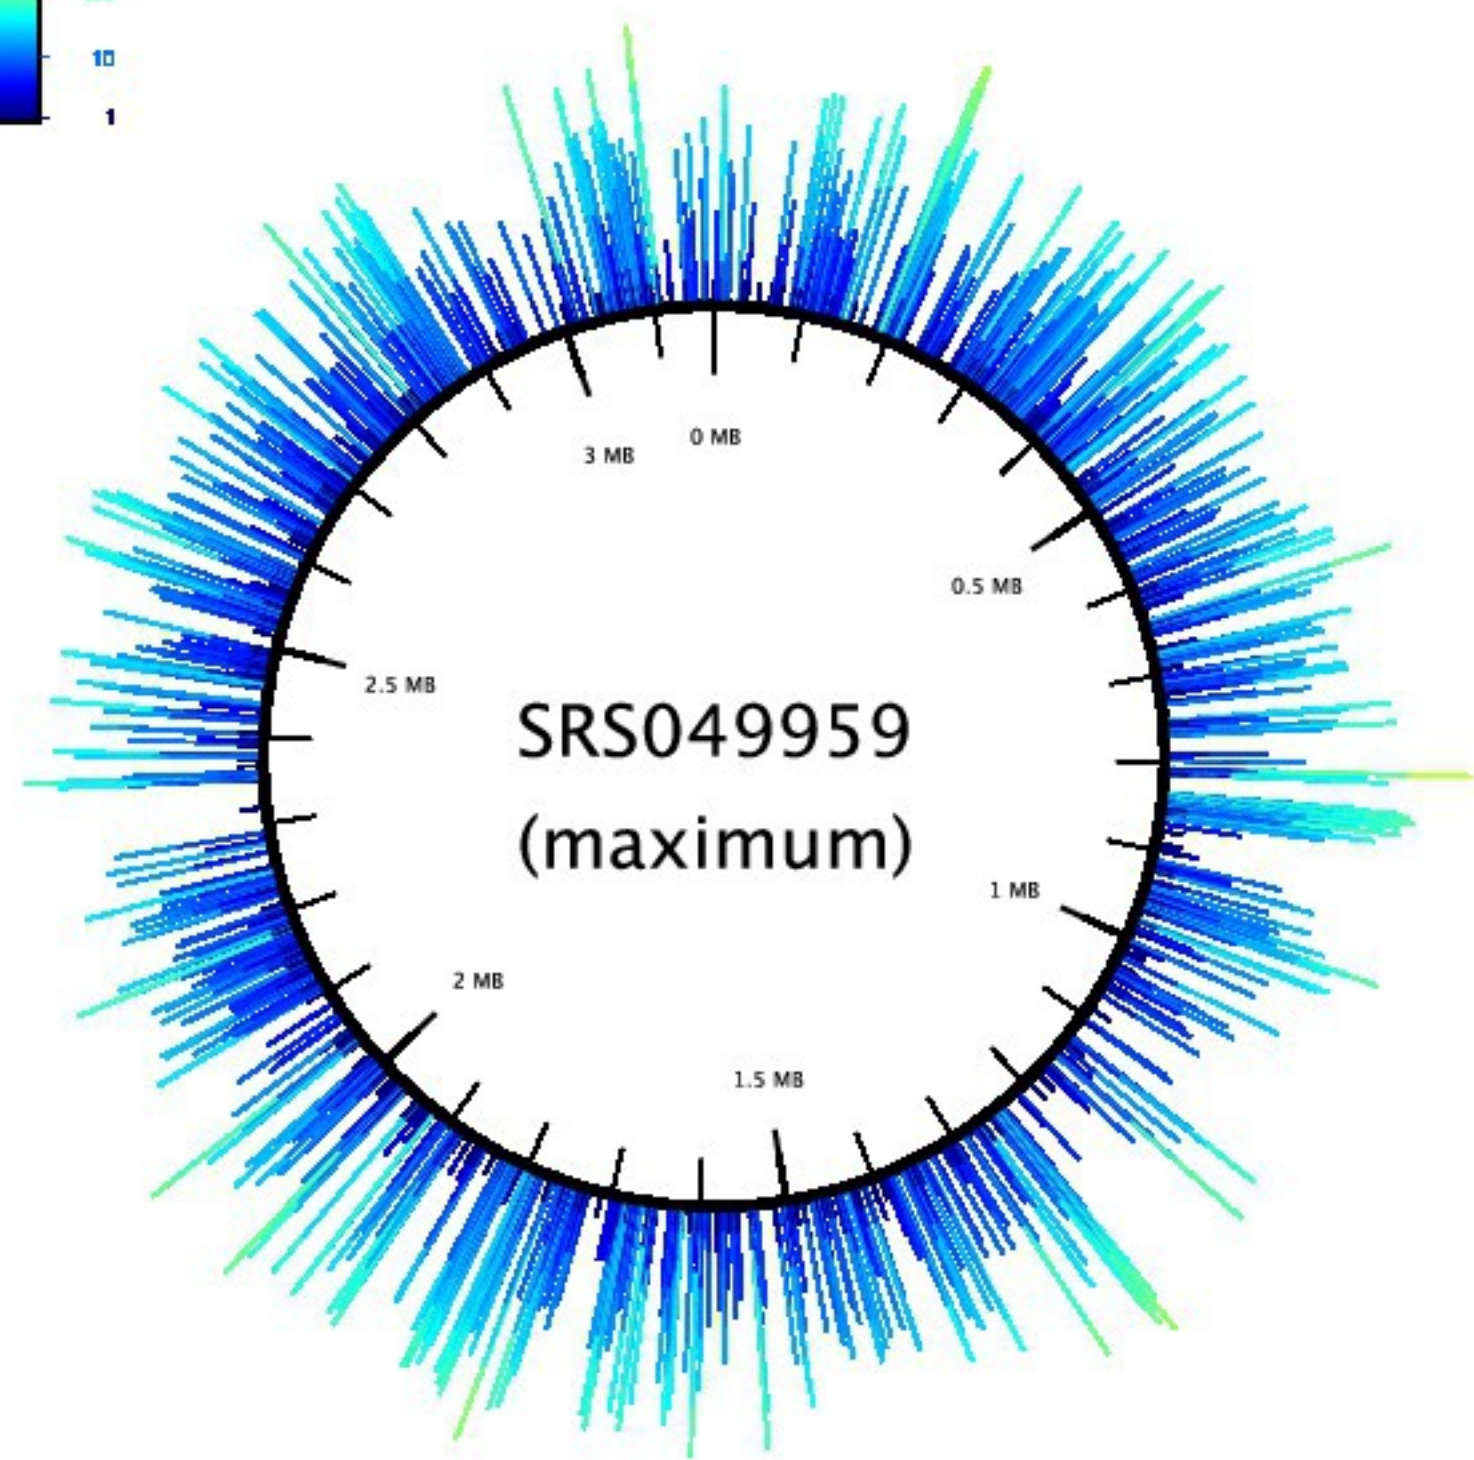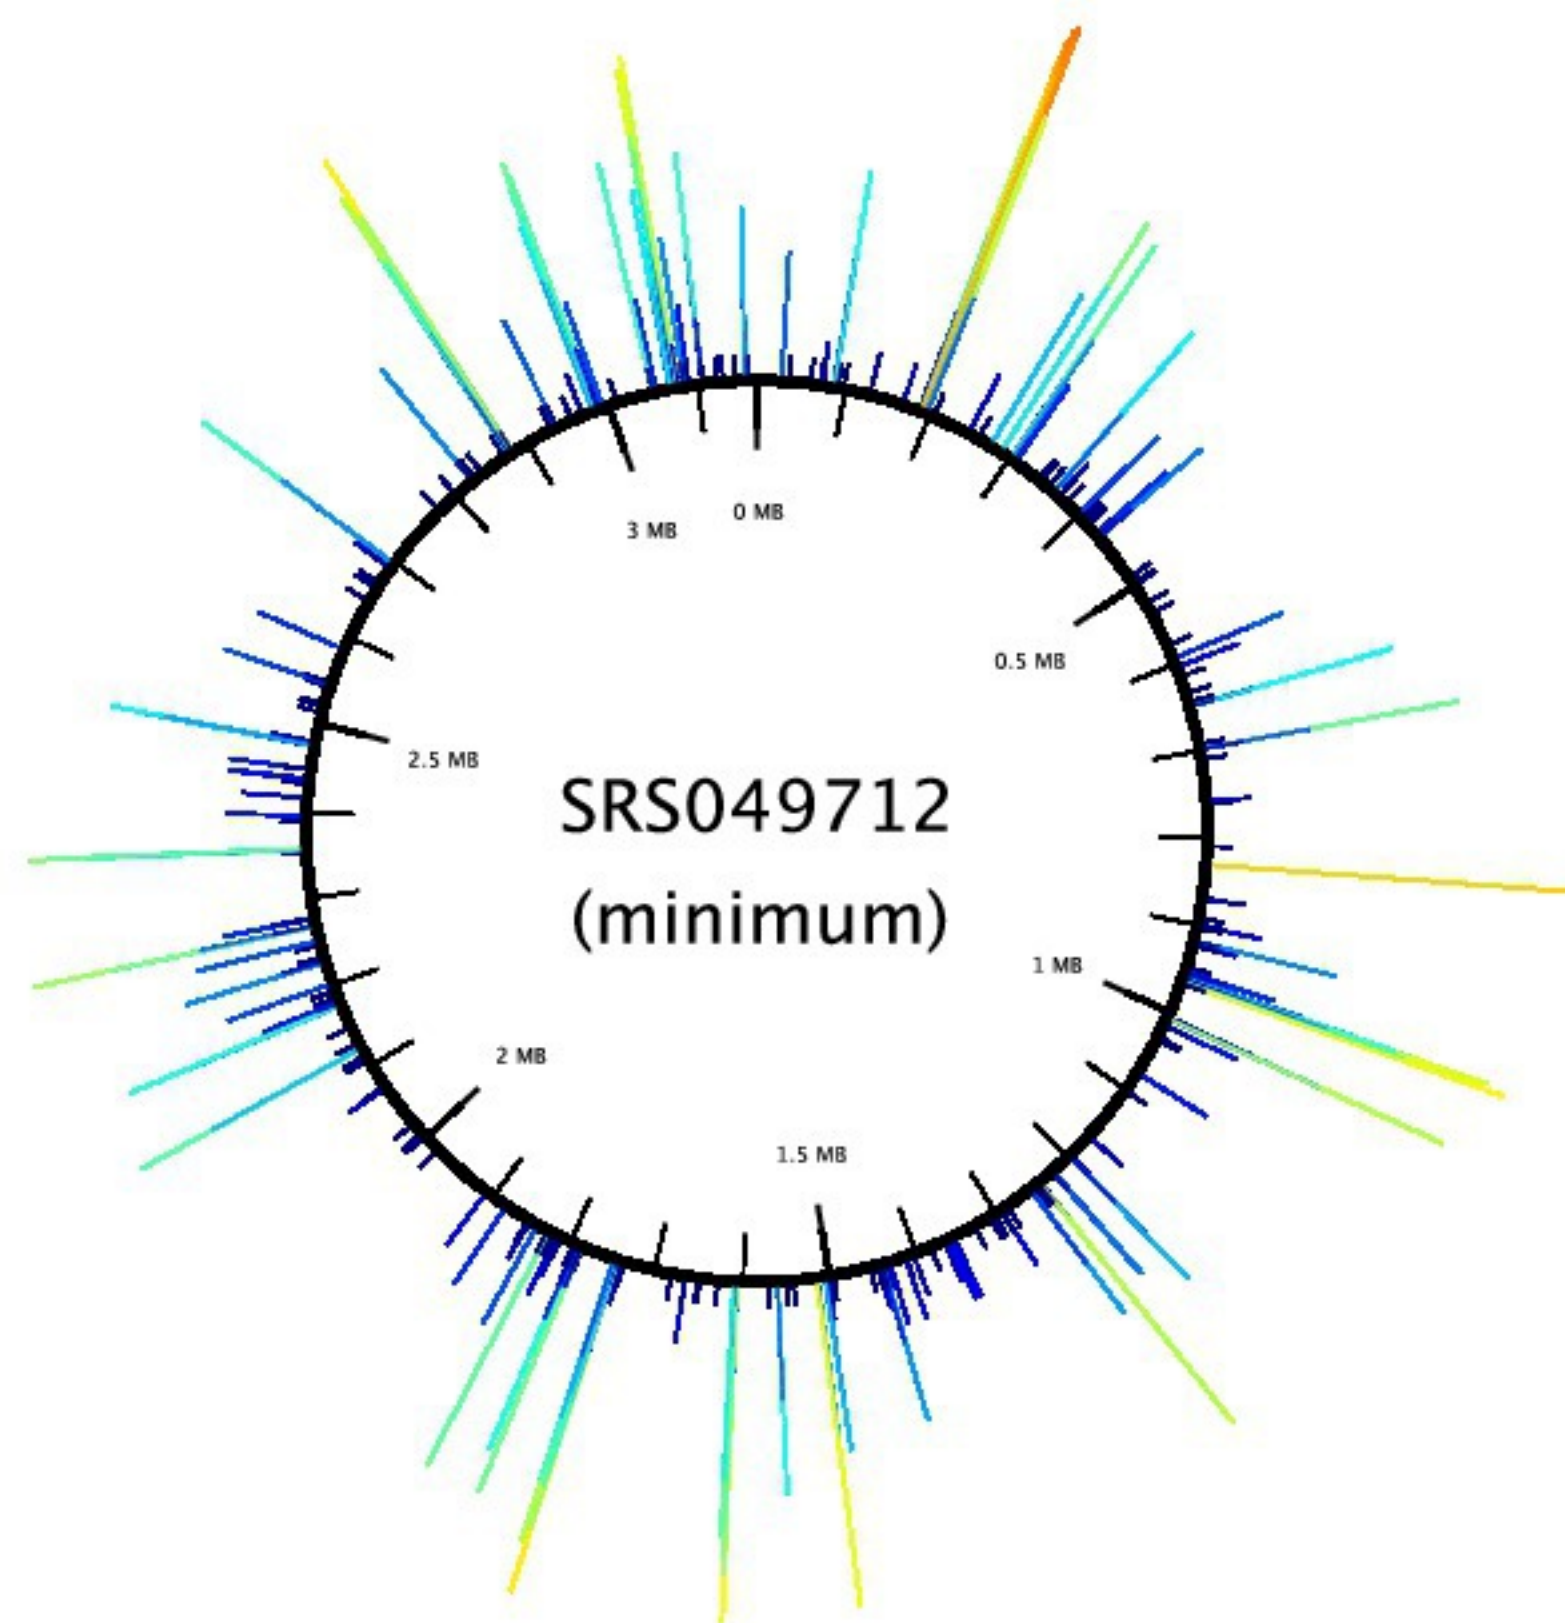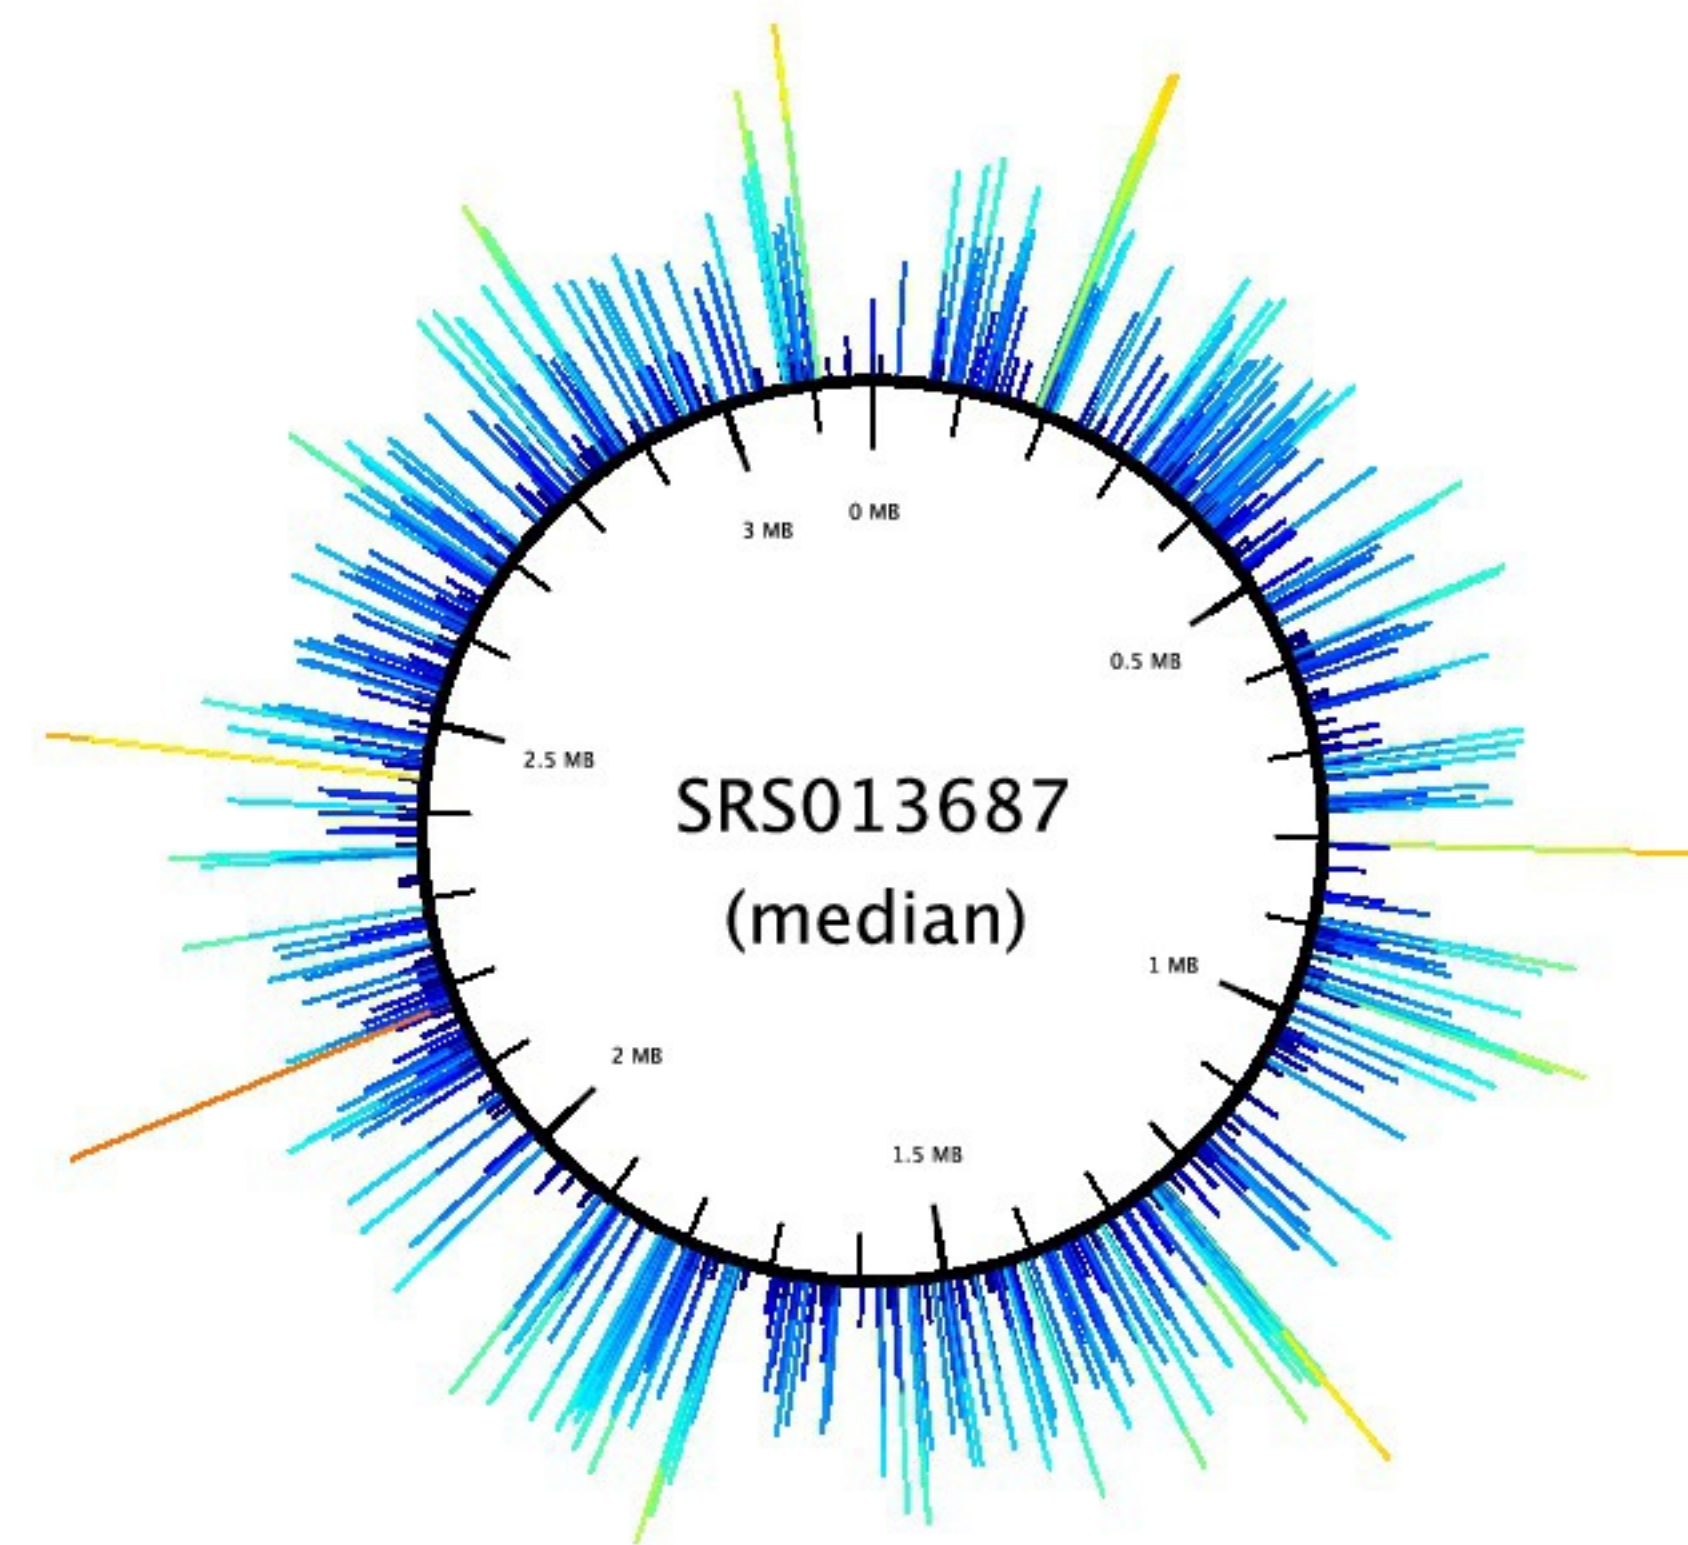

# *Ruminococcus torques* ATCC 27756

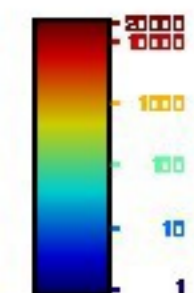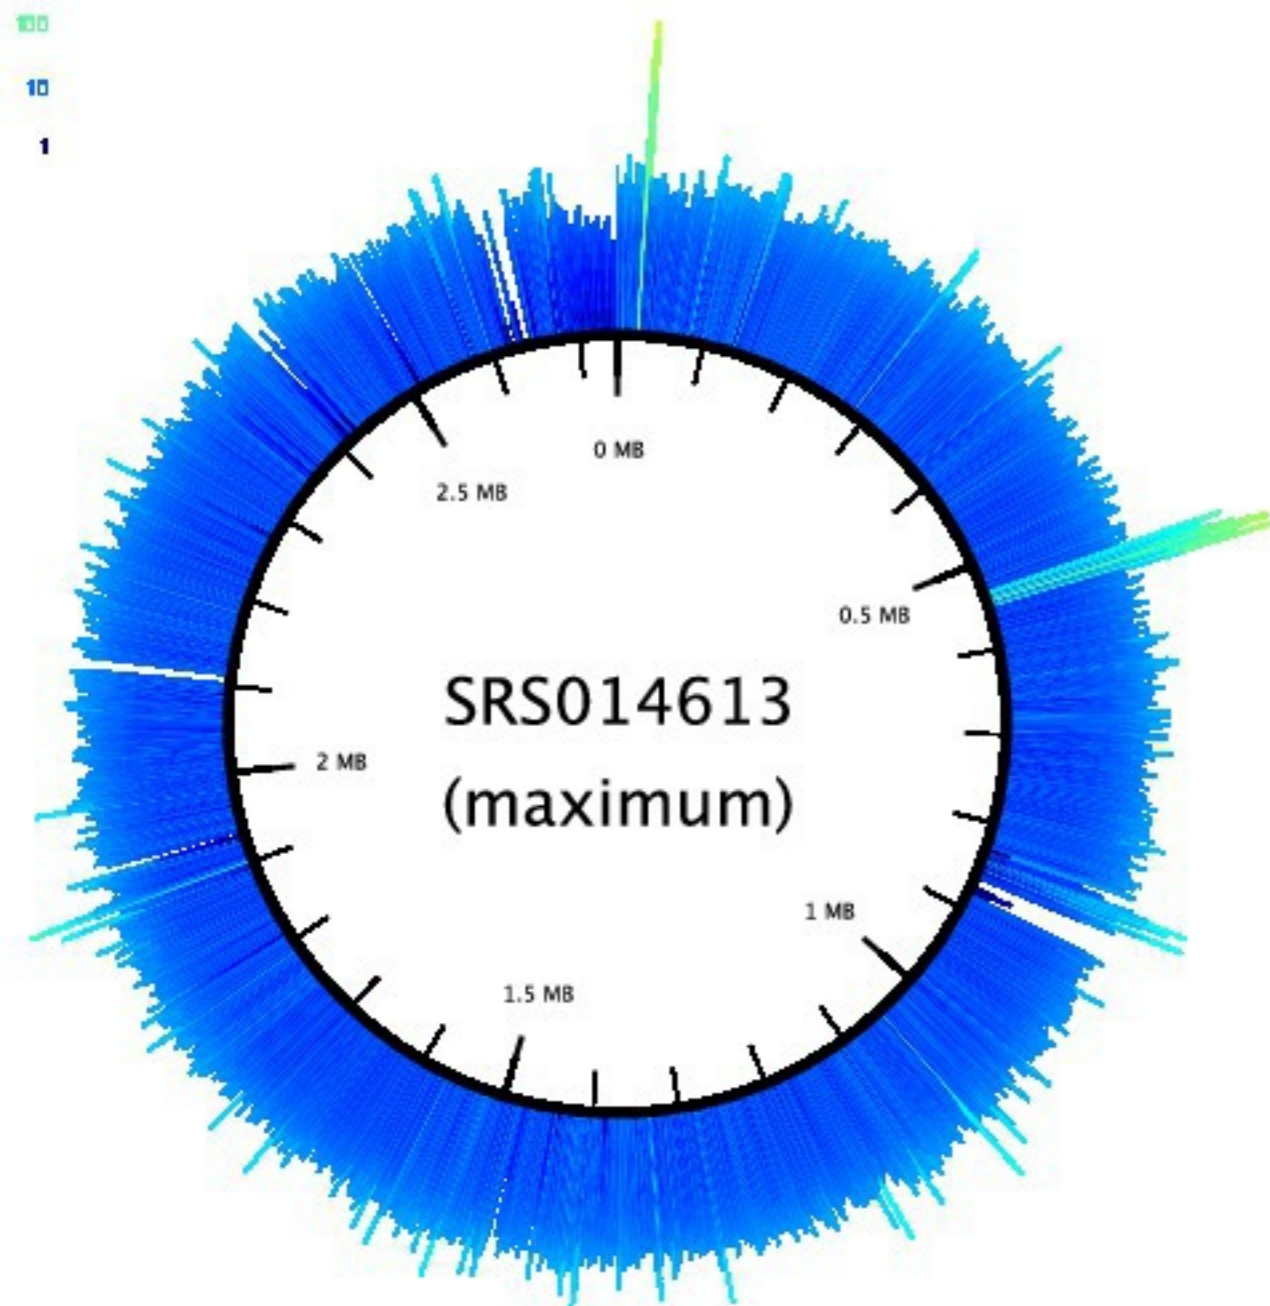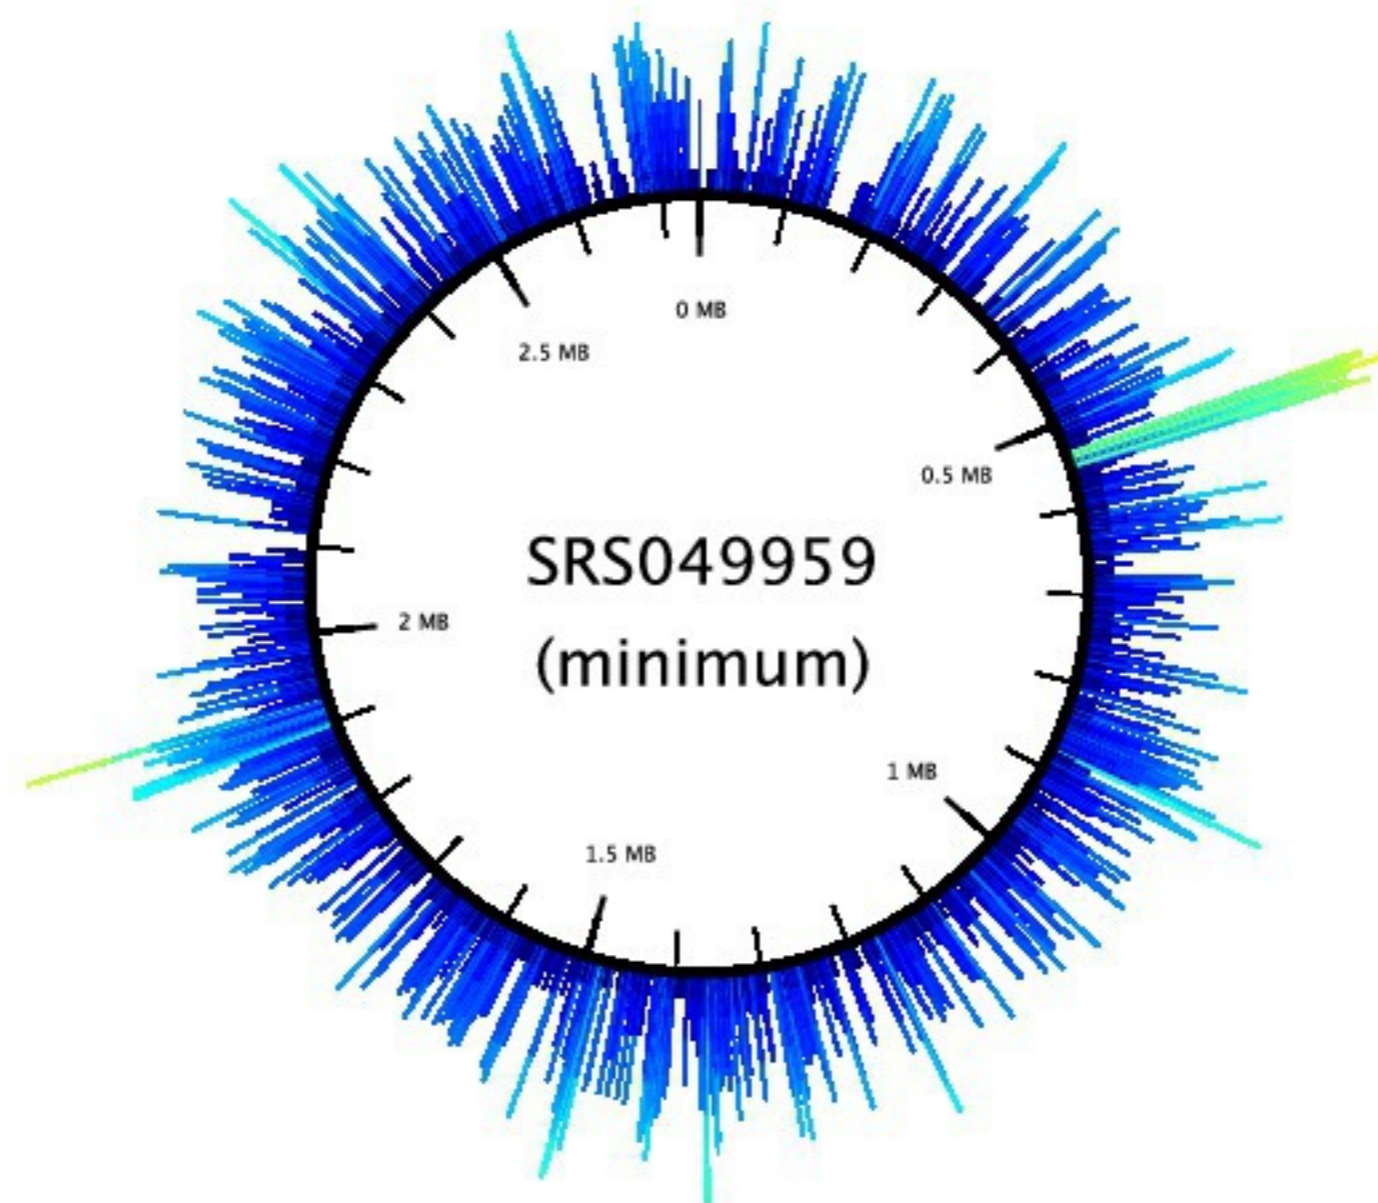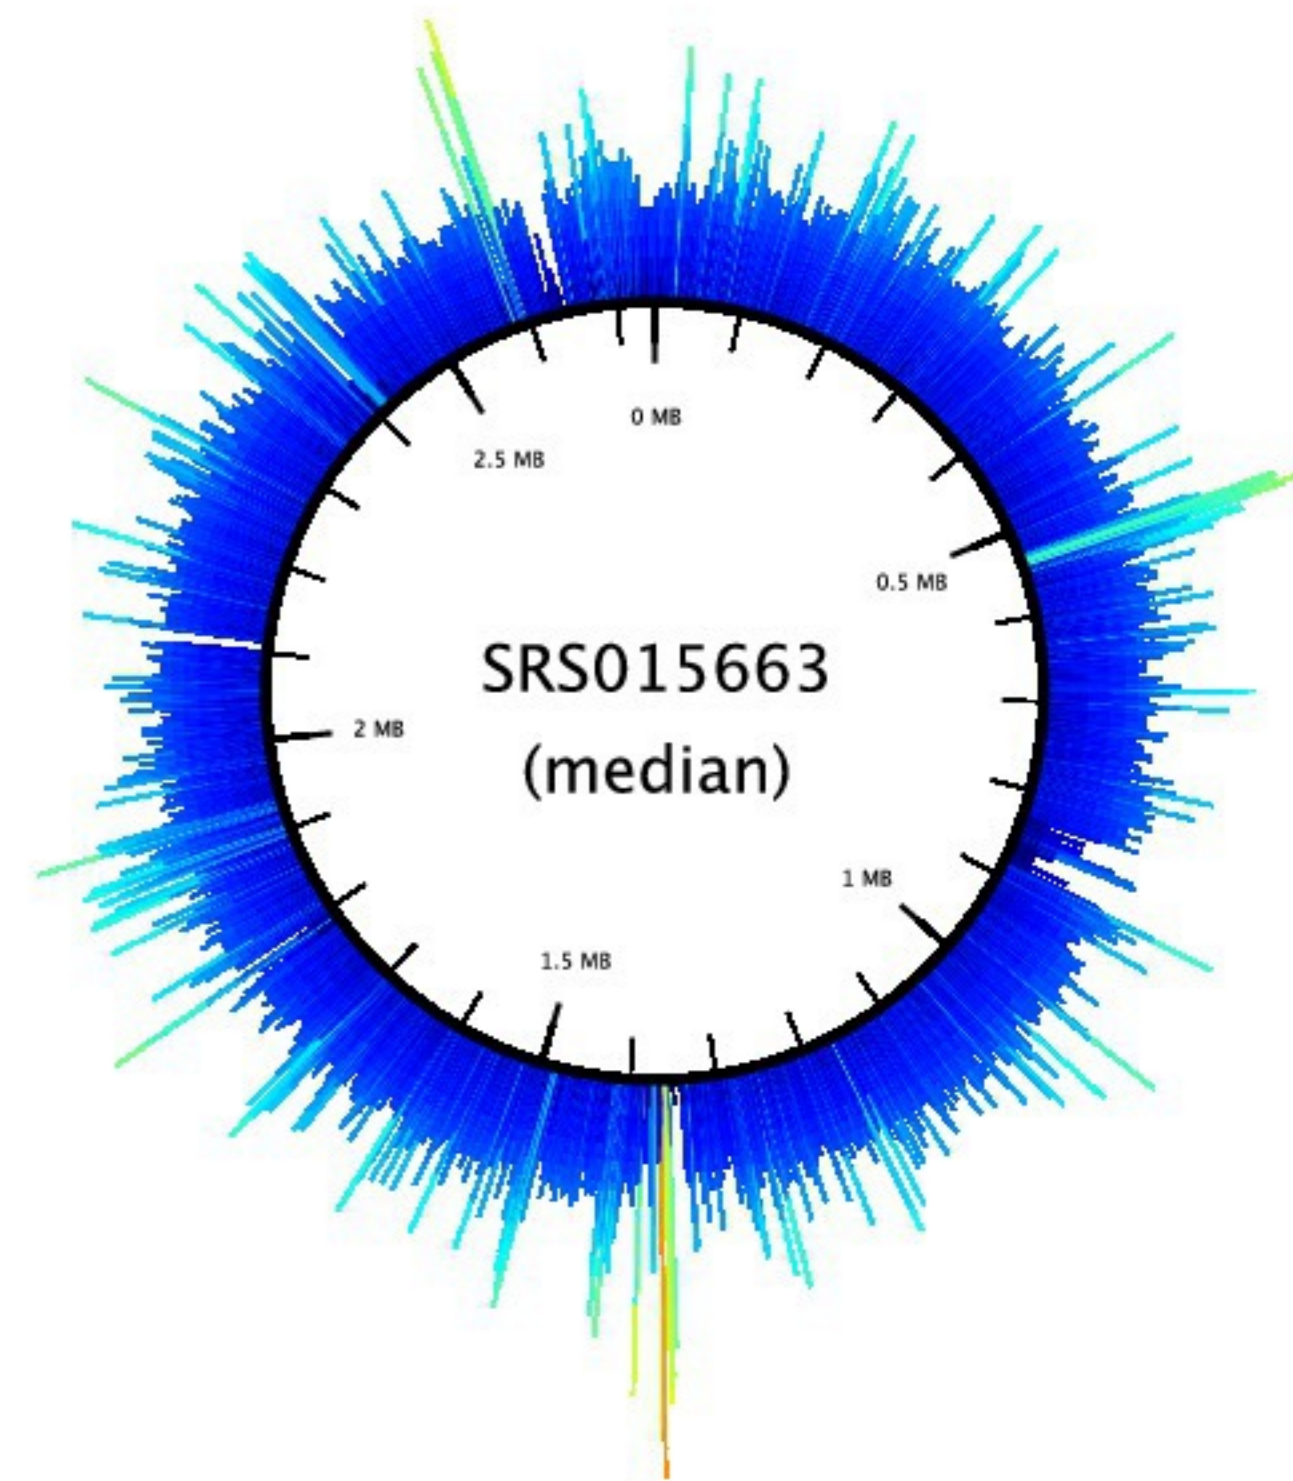

# *Veillonella dispar* ATCC 17748

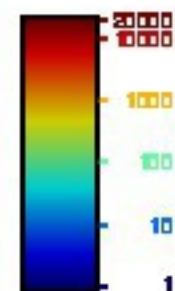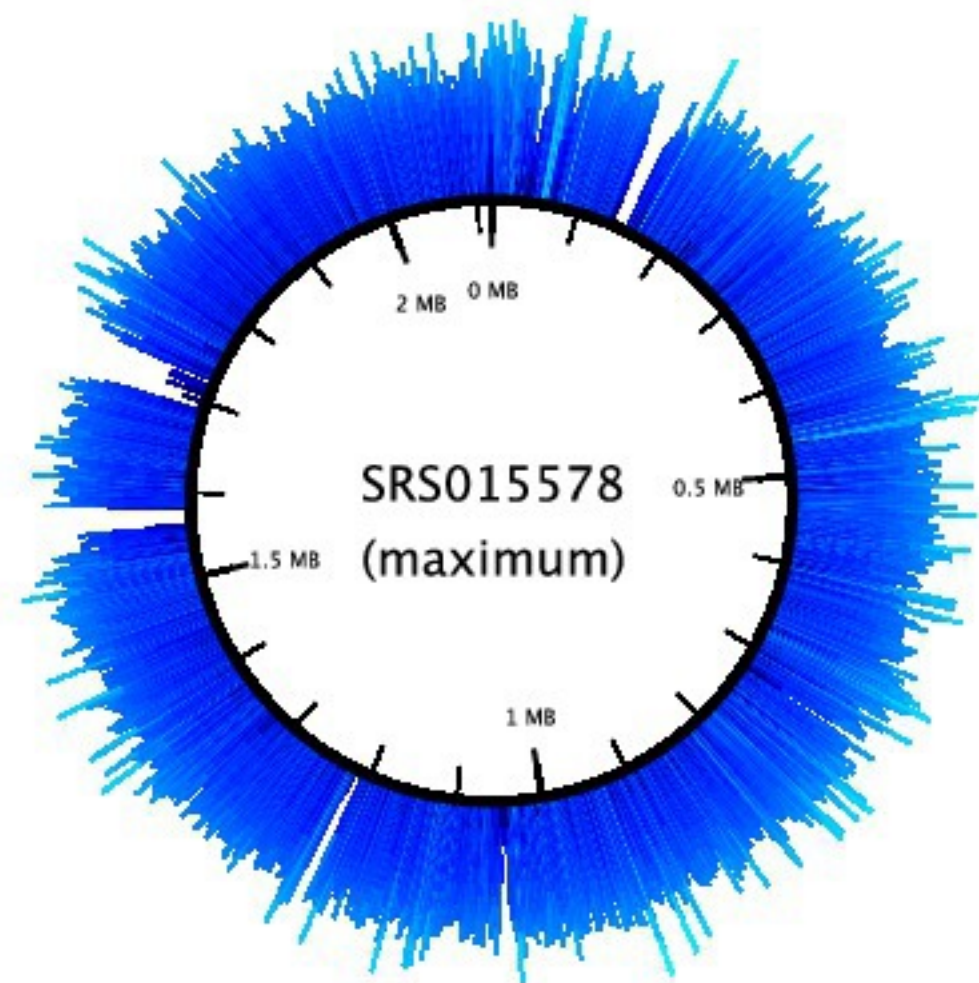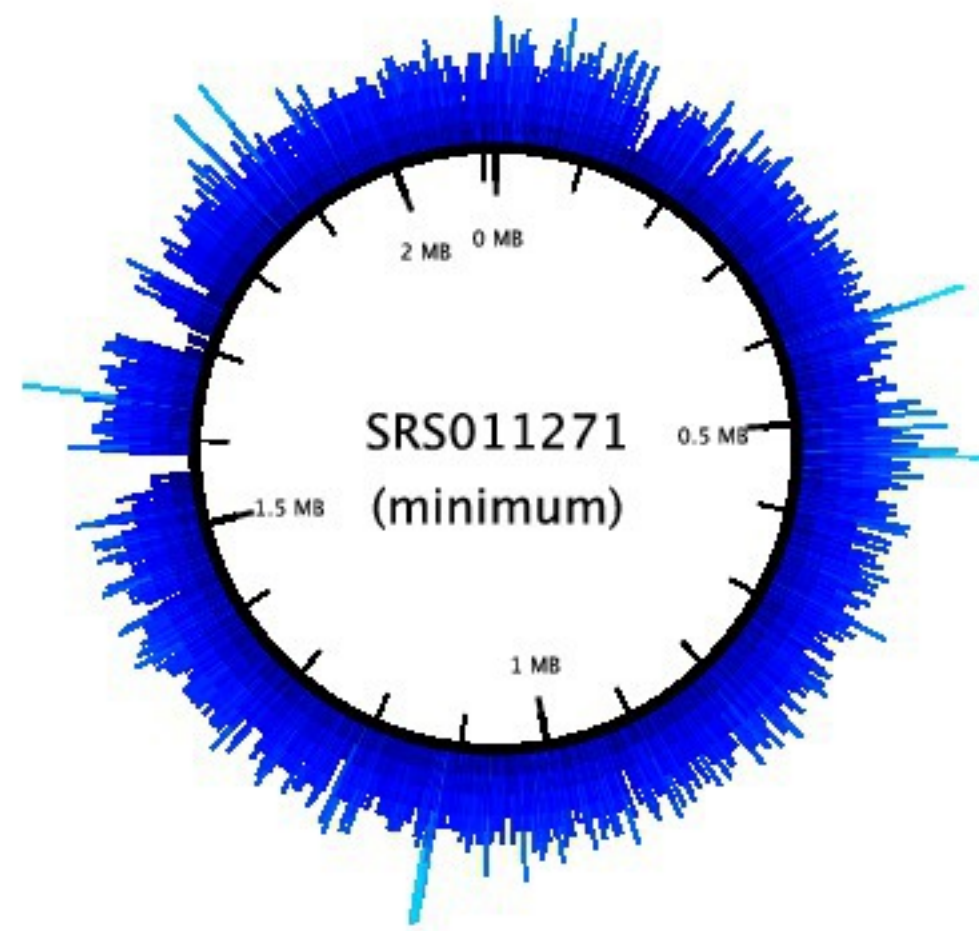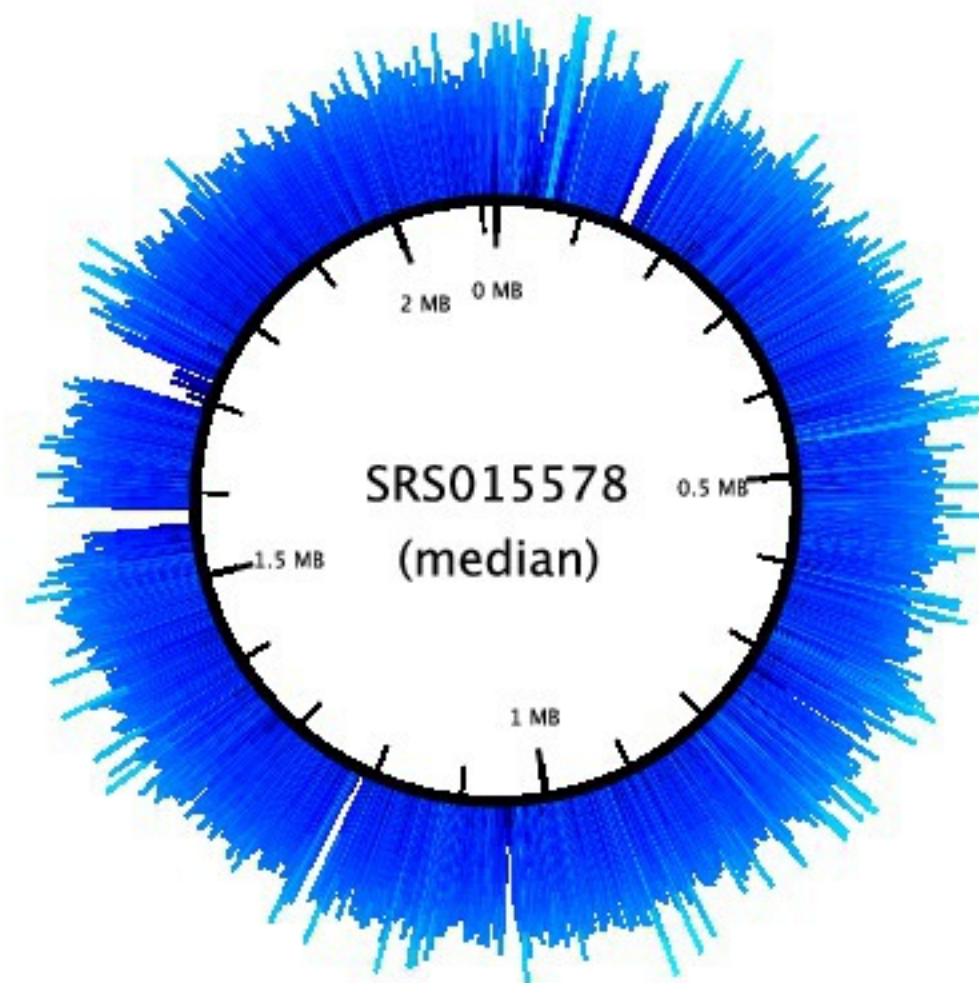

# *Streptococcus parasanguinis* ATCC 15912

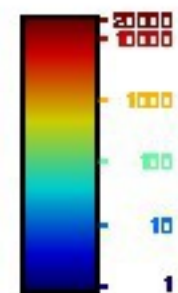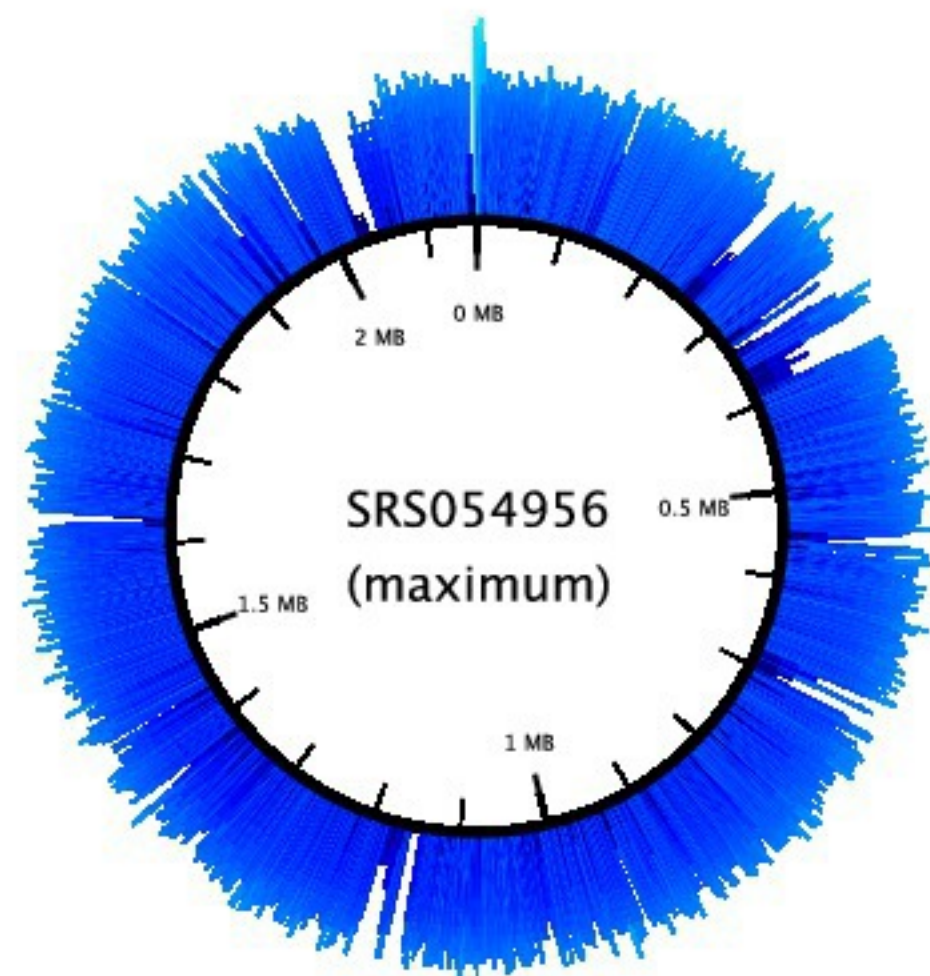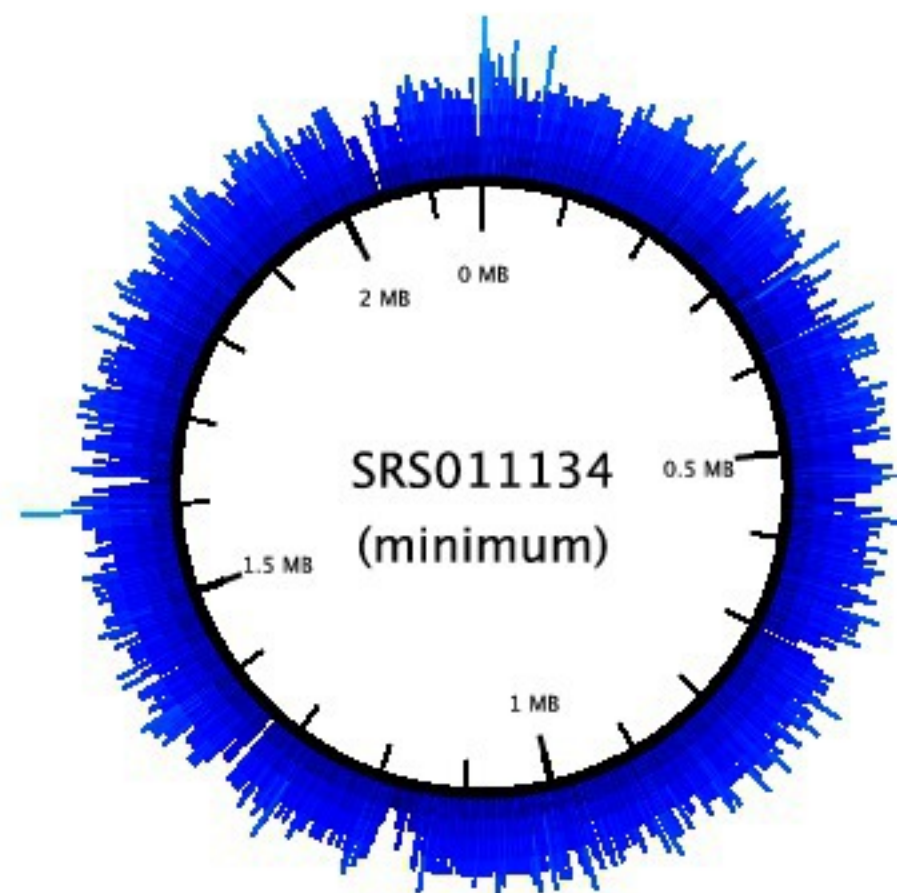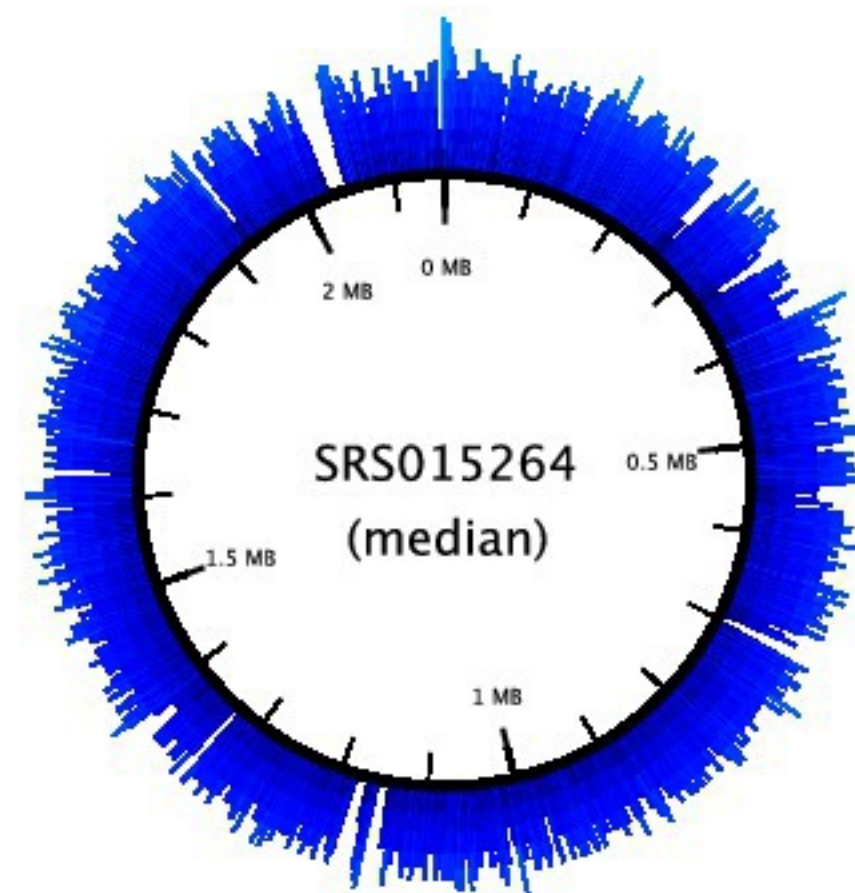

# *Streptococcus salivarius* SK126

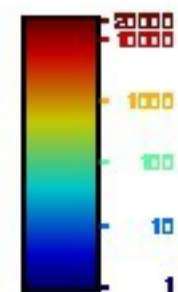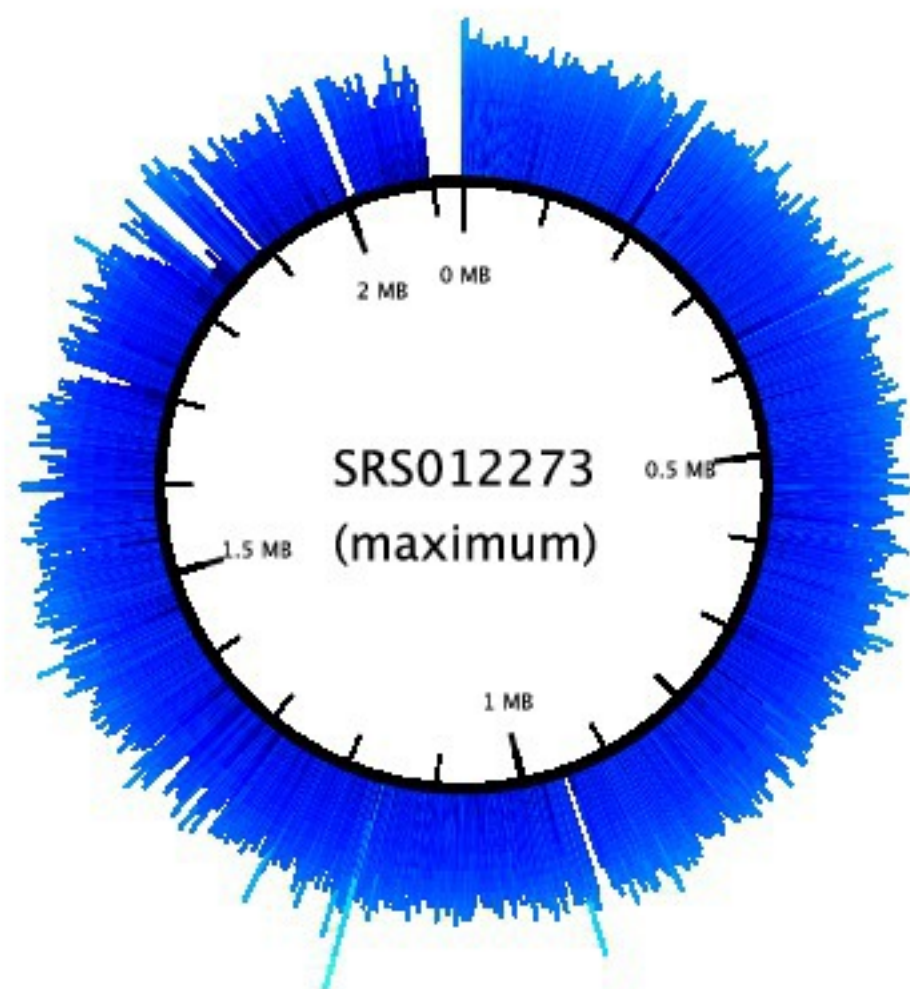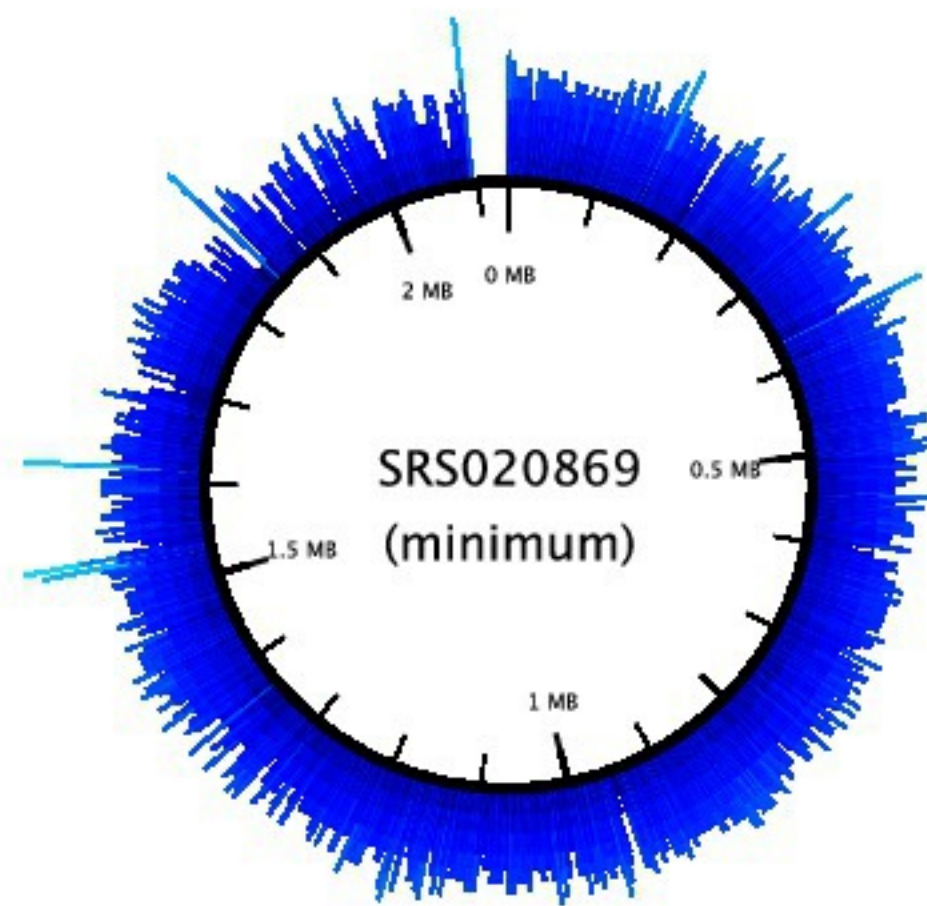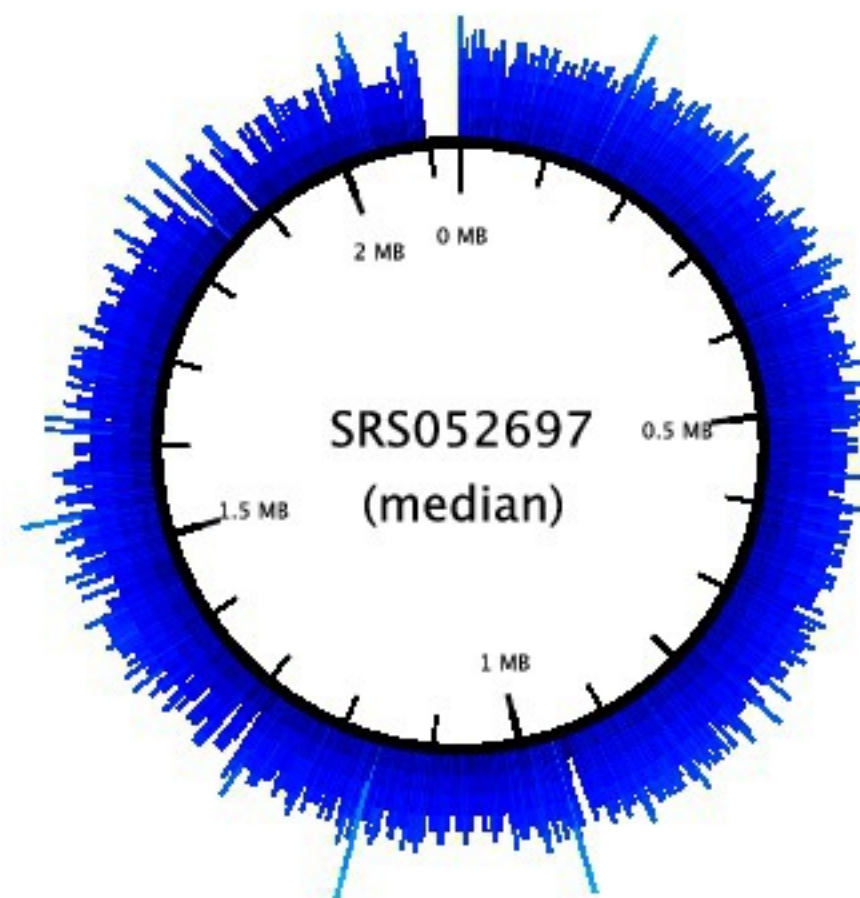

Supplement: pone.0097279.s001.pdf [file pone.0097279.s001.pdf]
