# Supplementary material for: The Prevalence of Species and Strains in the Human Microbiome: A Resource for Experimental Efforts
Source: PubMed Central journal article supplement (PMC4020798; doi:10.1371/journal.pone.0097279), 2014-05-14

# Samples

# Anterior Nares (16S)

# Genera

# A

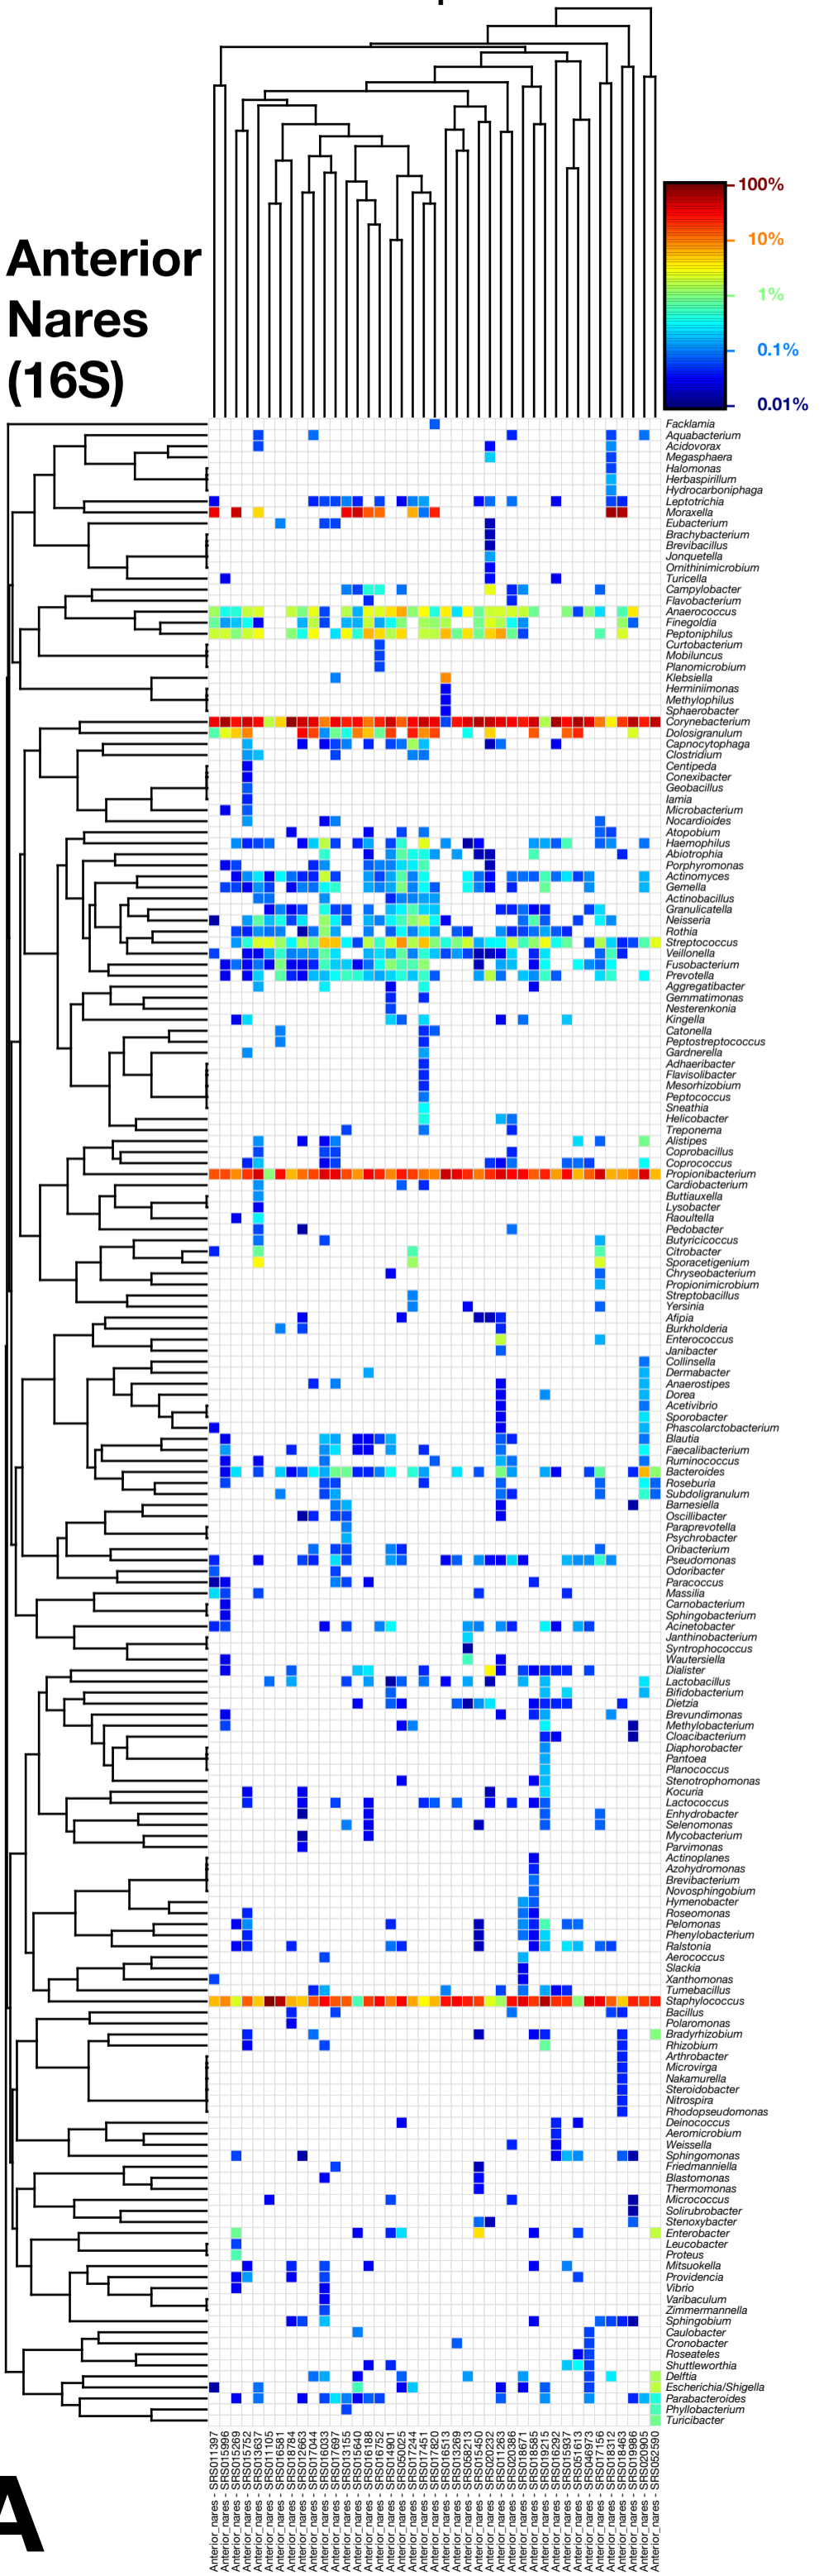

# Samples

# Buccal Mucosa (16S)

# Genera

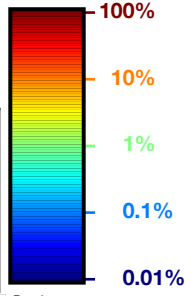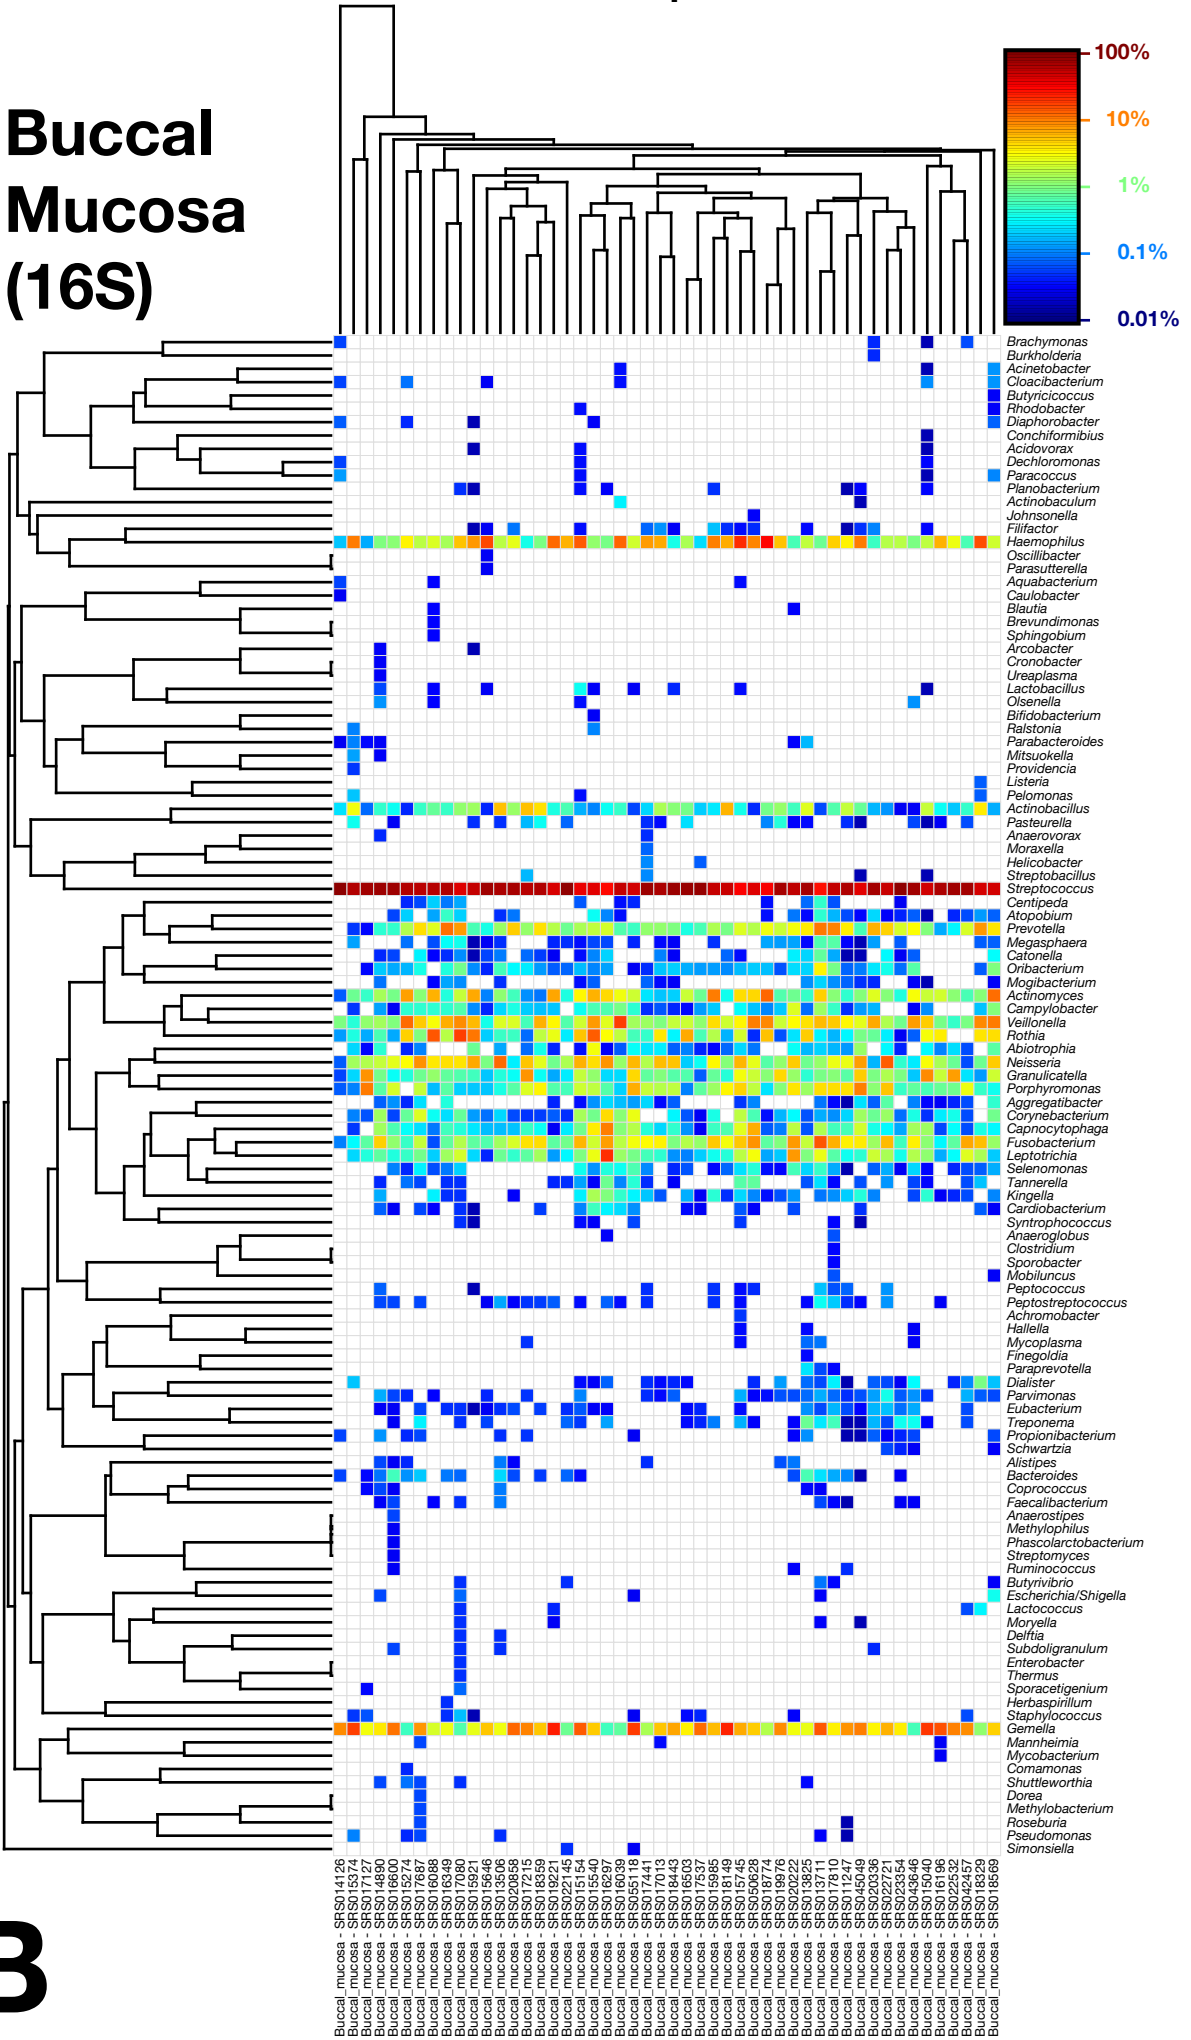

**B**

- Brachymonas*
- Burkholderia*
- Acinetobacter*
- Cloacibacterium*
- Butyrivibrio*
- Rhodobacter*
- Diaphorobacter*
- Conchiformibius*
- Acidovorax*
- Dechloromonas*
- Paracoccus*
- Pianobacterium*
- Actinobaculum*
- Johnsonella*
- Filifactor*
- Haemophilus*
- Oscillibacter*
- Parasutterella*
- Aquabacterium*
- Caulobacter*
- Blautia*
- Brevundimonas*
- Springobium*
- Arcobacter*
- Cronobacter*
- Ureaplasma*
- Lactobacillus*
- Olsenella*
- Blifodobacterium*
- Ralstonia*
- Parabacteroides*
- Mitsuokella*
- Providencia*
- Listeria*
- Pelomonas*
- Actinobacillus*
- Pasteurella*
- Anaerovorax*
- Moraxella*
- Helicobacter*
- Streptobacillus*
- Streptococcus*
- Centipeda*
- Atopobium*
- Prevotella*
- Megasphaera*
- Catonella*
- Oribacterium*
- Mogibacterium*
- Actinomyces*
- Campylobacter*
- Veillonella*
- Rothia*
- Abiotrophia*
- Neisseria*
- Granulicatella*
- Porphyromonas*
- Aggregatibacter*
- Corynebacterium*
- Campyloptophaga*
- Fusobacterium*
- Leptotrichia*
- Selenomonas*
- Tannerella*
- Kingella*
- Capnobacterium*
- Syntrophococcus*
- Anaeroglobus*
- Clostridium*
- Sporobacter*
- Mobiluncus*
- Peptococcus*
- Peptostreptococcus*
- Achromobacter*
- Hallella*
- Mycoplasma*
- Finnegoldia*
- Paraprevotella*
- Dialister*
- Parvimonas*
- Eubacterium*
- Treponema*
- Propionibacterium*
- Schwartzia*
- Alistipes*
- Bacteroides*
- Coprococcus*
- Faecalibacterium*
- Anaerostipes*
- Methylophilus*
- Phascolarctobacterium*
- Streptomyces*
- Ruminococcus*
- Butyrivibrio*
- Escherichia/Shigella*
- Lactococcus*
- Moryella*
- Delftia*
- Subdoligranulum*
- Enterobacter*
- Thermus*
- Sporocystigenium*
- Herbaspirillum*
- Staphylococcus*
- Gemella*
- Mannheimia*
- Mycobacterium*
- Comamonas*
- Shuttleworthia*
- Dorea*
- Methylobacterium*
- Roseburia*
- Pseudomonas*
- Simonsiella*

- Buccal\_mucosa - SFS014126
- Buccal\_mucosa - SFS015374
- Buccal\_mucosa - SFS017127
- Buccal\_mucosa - SFS016690
- Buccal\_mucosa - SFS016890
- Buccal\_mucosa - SFS015274
- Buccal\_mucosa - SFS017687
- Buccal\_mucosa - SFS016088
- Buccal\_mucosa - SFS016349
- Buccal\_mucosa - SFS015920
- Buccal\_mucosa - SFS015921
- Buccal\_mucosa - SFS015646
- Buccal\_mucosa - SFS013506
- Buccal\_mucosa - SFS020858
- Buccal\_mucosa - SFS017215
- Buccal\_mucosa - SFS016297
- Buccal\_mucosa - SFS019929
- Buccal\_mucosa - SFS020145
- Buccal\_mucosa - SFS015154
- Buccal\_mucosa - SFS015540
- Buccal\_mucosa - SFS016297
- Buccal\_mucosa - SFS019918
- Buccal\_mucosa - SFS017441
- Buccal\_mucosa - SFS017013
- Buccal\_mucosa - SFS018443
- Buccal\_mucosa - SFS016503
- Buccal\_mucosa - SFS015985
- Buccal\_mucosa - SFS018149
- Buccal\_mucosa - SFS015745
- Buccal\_mucosa - SFS050628
- Buccal\_mucosa - SFS018774
- Buccal\_mucosa - SFS020222
- Buccal\_mucosa - SFS013825
- Buccal\_mucosa - SFS013711
- Buccal\_mucosa - SFS017810
- Buccal\_mucosa - SFS014526
- Buccal\_mucosa - SFS020396
- Buccal\_mucosa - SFS020271
- Buccal\_mucosa - SFS023354
- Buccal\_mucosa - SFS043646
- Buccal\_mucosa - SFS016146
- Buccal\_mucosa - SFS022632
- Buccal\_mucosa - SFS042457
- Buccal\_mucosa - SFS018329
- Buccal\_mucosa - SFS018569

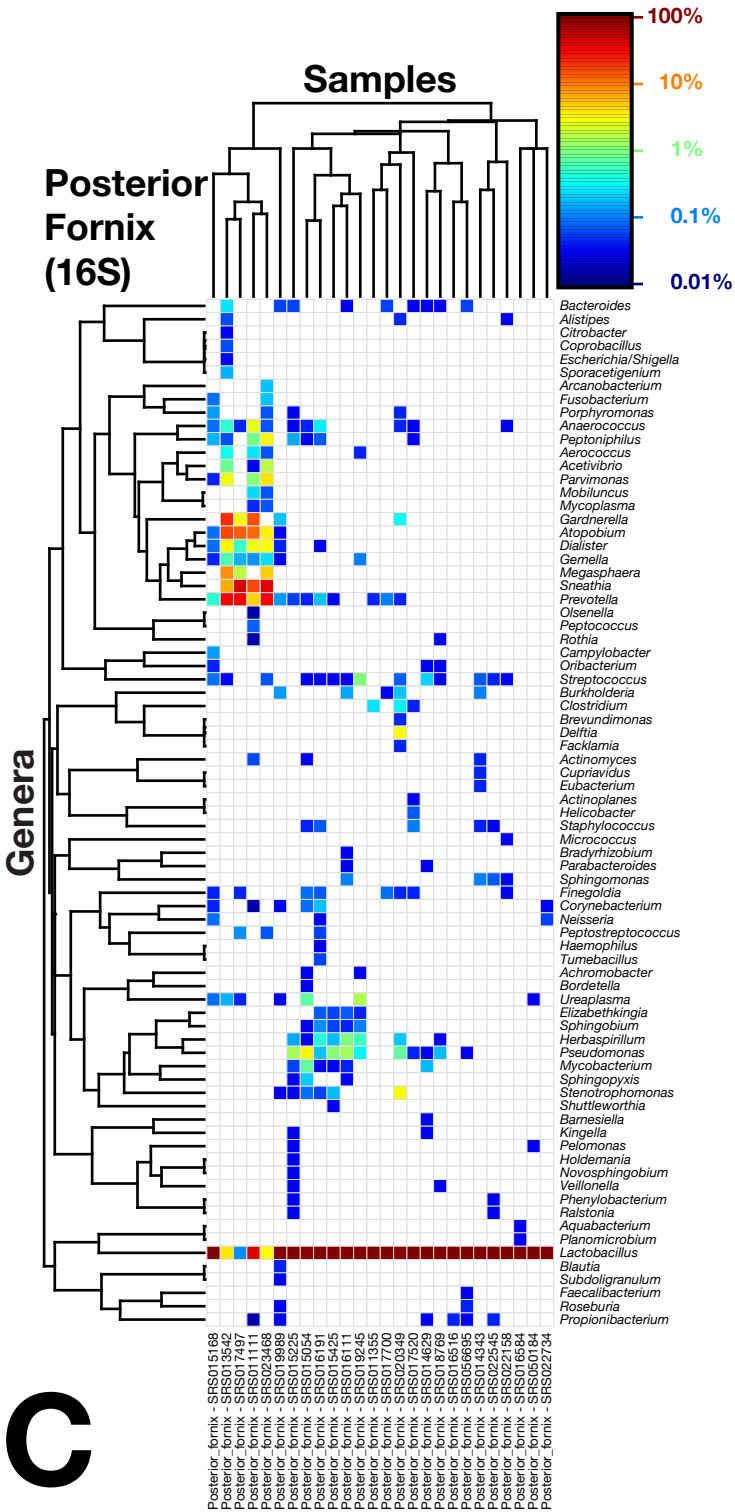

# Stool (16S)

## Samples

## Genera

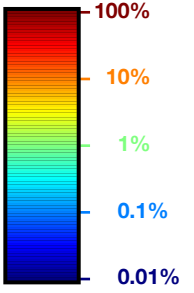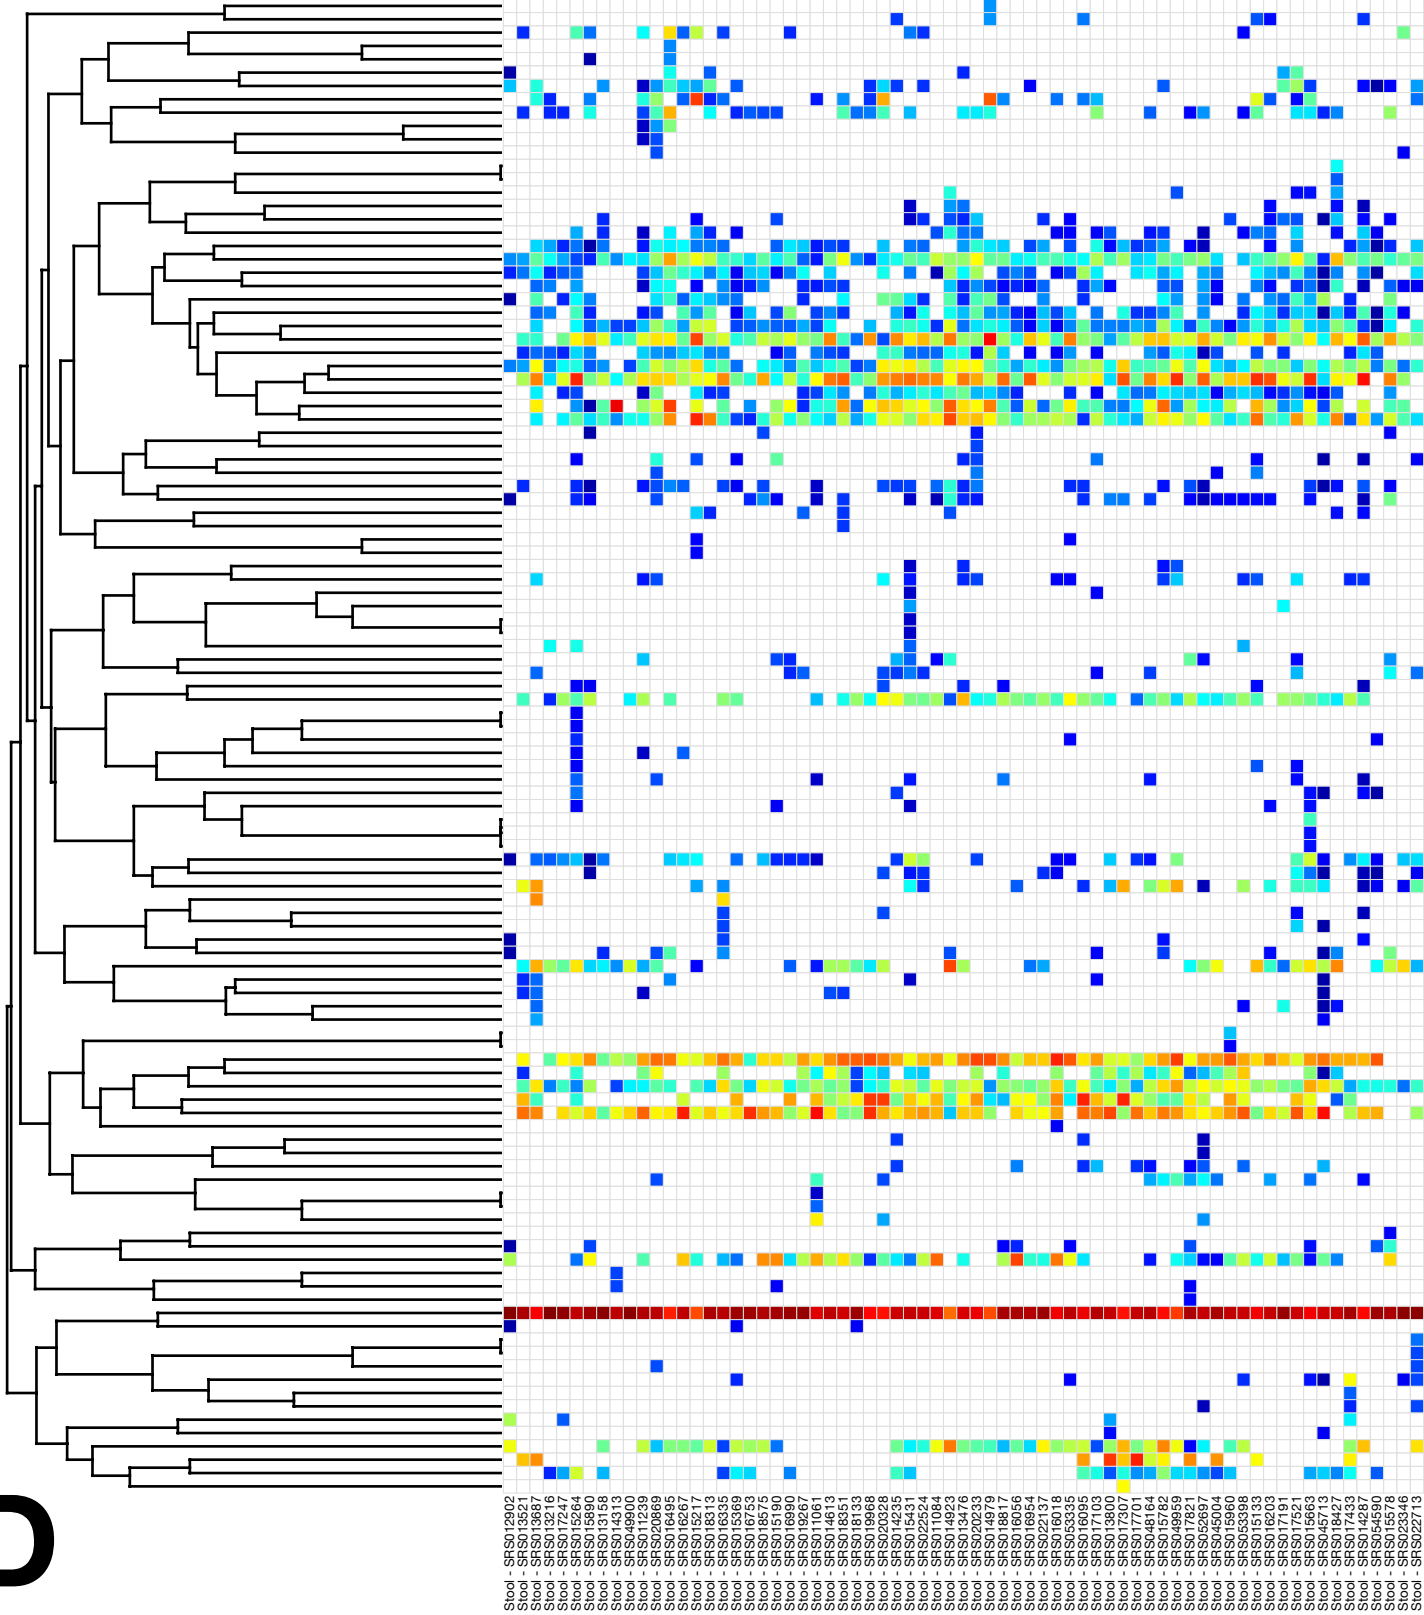

- Acetitomaculum
- Desulfovibrio
- Acidaminococcus
- Citrobacter
- Gordonibacter
- Cronobacter
- Escherichia/Shigella
- Akkermansia
- Bifidobacterium
- Enterococcus
- Methanobrevibacter
- Lactococcus
- Buttiauxella
- Enterobacter
- Howardella
- Anaerofilum
- Papillibacter
- Holdemania
- Anaerostipes
- Blautia
- Coprobacillus
- Streptococcus
- Collinsella
- Butyrivibrio
- Dorea
- Roseburia
- Acetivibrio
- Coprococcus
- Faecalibacterium
- Sporobacter
- Ruminococcus
- Subdoligranulum
- Actinobacillus
- Pseudobutyrvibrio
- Lactobacillus
- Oxalobacter
- Anaerovorax
- Veillonella
- Eggerthella
- Ornithinimicrobium
- Oribacterium
- Varibaculum
- Allisonella
- Anaerotruncus
- Dehalobacter
- Catenibacterium
- Enhydrobacter
- Streptobacillus
- Megasphaera
- Clostridium
- Sporacetigenium
- Actinomycetes
- Odoribacter
- Abiotrophia
- Aggregatibacter
- Neisseria
- Rothia
- Peptoniphilus
- Peptococcus
- Capnocytophaga
- Corynebacterium
- Anaeroplasma
- Xylanibacter
- Robinsoniella
- Eubacterium
- Porphyromonas
- Prevotella
- Asteroleplasma
- Anaerofustis
- Campylobacter
- Gemella
- Turicibacter
- Dialister
- Ethanoligenens
- Hydrogenanaerobacterium
- Klebsiella
- Slackia
- Brachyspira
- Leptotrichia
- Alistipes
- Butyrivibrios
- Oscillibacter
- Barnesiella
- Parabacteroides
- Planobacterium
- Cloacibacillus
- Enterorhabdus
- Victivallis
- Acetanaerobacterium
- Sneathia
- Tannerella
- Succinoclasticum
- Asaccharobacter
- Haemophilus
- Parasutterella
- Acidovorax
- Propionibacterium
- Sarcina
- Bacteroides
- Granulicatella
- Anaerococcus
- Finnegoldia
- Parvimonas
- Fusobacterium
- Mycoplasma
- Peptostreptococcus
- Megamonas
- Rikenella
- Phascolarctobacterium
- Paraprevotella
- Sutterella
- Succinivibrio

**D**

Stool - SF5S012902  
 Stool - SF5S013521  
 Stool - SF5S013687  
 Stool - SF5S013816  
 Stool - SF5S017247  
 Stool - SF5S015896  
 Stool - SF5S013158  
 Stool - SF5S014313  
 Stool - SF5S049800  
 Stool - SF5S011239  
 Stool - SF5S016495  
 Stool - SF5S016267  
 Stool - SF5S015217  
 Stool - SF5S018313  
 Stool - SF5S016335  
 Stool - SF5S017247  
 Stool - SF5S016253  
 Stool - SF5S018575  
 Stool - SF5S015190  
 Stool - SF5S016890  
 Stool - SF5S019267  
 Stool - SF5S014613  
 Stool - SF5S018351  
 Stool - SF5S018133  
 Stool - SF5S019868  
 Stool - SF5S020228  
 Stool - SF5S015431  
 Stool - SF5S022524  
 Stool - SF5S011084  
 Stool - SF5S014923  
 Stool - SF5S020228  
 Stool - SF5S020228  
 Stool - SF5S014879  
 Stool - SF5S018817  
 Stool - SF5S016954  
 Stool - SF5S016017  
 Stool - SF5S015918  
 Stool - SF5S053335  
 Stool - SF5S016095  
 Stool - SF5S017103  
 Stool - SF5S013600  
 Stool - SF5S015133  
 Stool - SF5S015203  
 Stool - SF5S017247  
 Stool - SF5S017247  
 Stool - SF5S015663  
 Stool - SF5S045713  
 Stool - SF5S019427  
 Stool - SF5S017432  
 Stool - SF5S045690  
 Stool - SF5S015578  
 Stool - SF5S023346  
 Stool - SF5S022713

# Supragingival Plaque (16S)

## Samples

Genera

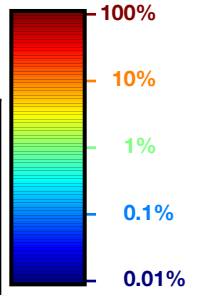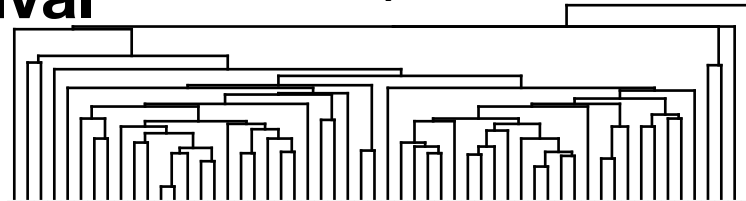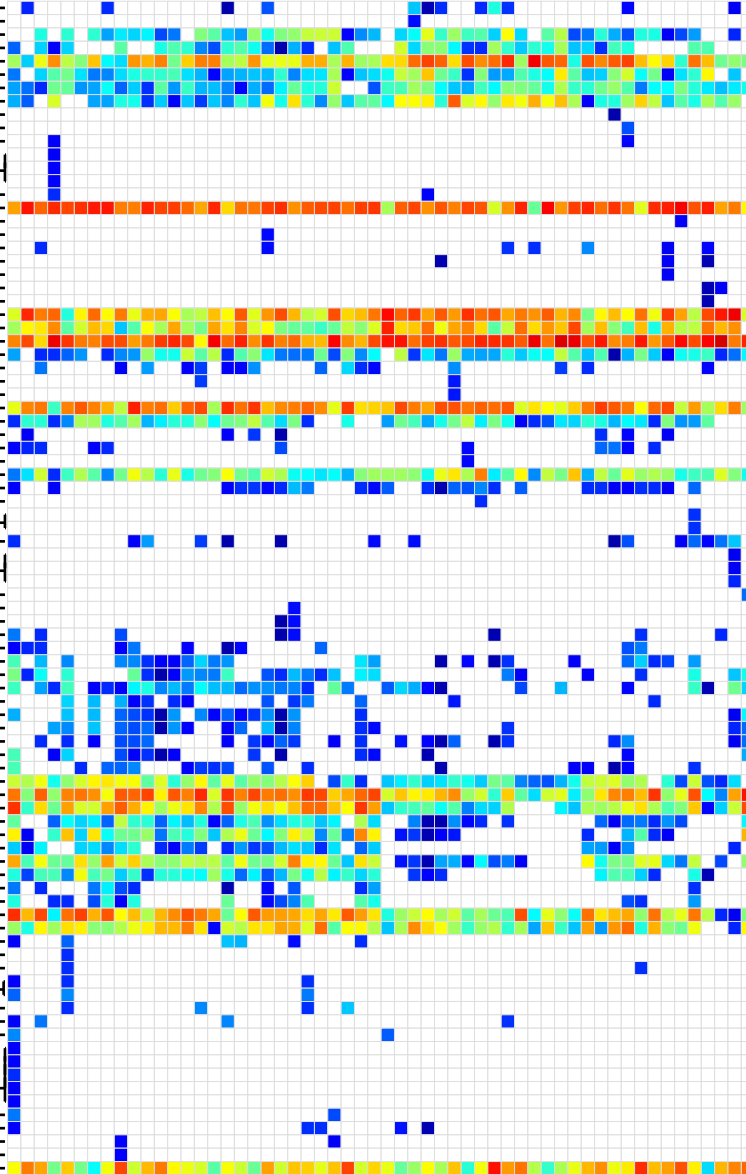

- Actinobaculum*
- Collinsella*
- Aggregatibacter*
- Abiotrophia*
- Neisseria*
- Gemella*
- Granulicatella*
- Haemophilus*
- Mannheimia*
- Oscillibacter*
- Parasutterella*
- Comamonas*
- Paludibacter*
- Phascolarctobacterium*
- Staphylococcus*
- Corynebacterium*
- Lactococcus*
- Anaerococcus*
- Lactobacillus*
- Cloacibacterium*
- Herbaspirillum*
- Odoribacter*
- Ralstonia*
- Actinomyces*
- Rothia*
- Streptococcus*
- Actinobacillus*
- Pasteurella*
- Moraxella*
- Salinicoccus*
- Campylobacter*
- Cardiobacterium*
- Bergeriella*
- Syntrophococcus*
- Paracoccus*
- Kingella*
- Planobacterium*
- Thermopulsispora*
- Alistipes*
- Barnesiella*
- Bacteroides*
- Diaphorobacter*
- Faecalibacterium*
- Parabacteroides*
- Anaerovorax*
- Alysiella*
- Pelomonas*
- Mogibacterium*
- Megasphaera*
- Oribacterium*
- Dialister*
- Parvimonas*
- Johnsonella*
- Eubacterium*
- Peptococcus*
- Filiifactor*
- Peptostreptococcus*
- Atopobium*
- Campylobacter*
- Fusobacterium*
- Prevotella*
- Catonella*
- Treponema*
- Centipeda*
- Selenomonas*
- Tannerella*
- Olsenella*
- Schwartzia*
- Leptotrichia*
- Porphyromonas*
- Mycoplasma*
- Bulleidia*
- Pseudomonas*
- Cryptobacterium*
- Shuttleworthia*
- Propionivibrio*
- Anaeroglobus*
- Moryella*
- Desulfotulbus*
- Paraprevotella*
- Pseudoramibacter*
- Sharpea*
- Solobacterium*
- Phocaeicola*
- Propionibacterium*
- Hallella*
- Slackia*
- Veillonella*

- Supragingival\_plaque - SFS013836
- Supragingival\_plaque - SFS015278
- Supragingival\_plaque - SFS015574
- Supragingival\_plaque - SFS015650
- Supragingival\_plaque - SFS019353
- Supragingival\_plaque - SFS019352
- Supragingival\_plaque - SFS017068
- Supragingival\_plaque - SFS015215
- Supragingival\_plaque - SFS016575
- Supragingival\_plaque - SFS016746
- Supragingival\_plaque - SFS015944
- Supragingival\_plaque - SFS020226
- Supragingival\_plaque - SFS017227
- Supragingival\_plaque - SFS011255
- Supragingival\_plaque - SFS014578
- Supragingival\_plaque - SFS016043
- Supragingival\_plaque - SFS016043
- Supragingival\_plaque - SFS0151244
- Supragingival\_plaque - SFS016808
- Supragingival\_plaque - SFS017691
- Supragingival\_plaque - SFS022725
- Supragingival\_plaque - SFS015394
- Supragingival\_plaque - SFS019394
- Supragingival\_plaque - SFS022149
- Supragingival\_plaque - SFS056053
- Supragingival\_plaque - SFS015947
- Supragingival\_plaque - SFS014884
- Supragingival\_plaque - SFS015859
- Supragingival\_plaque - SFS015735
- Supragingival\_plaque - SFS043755
- Supragingival\_plaque - SFS017445
- Supragingival\_plaque - SFS015158
- Supragingival\_plaque - SFS015989
- Supragingival\_plaque - SFS015959
- Supragingival\_plaque - SFS016200
- Supragingival\_plaque - SFS016092
- Supragingival\_plaque - SFS017814
- Supragingival\_plaque - SFS017025
- Supragingival\_plaque - SFS020862
- Supragingival\_plaque - SFS016380
- Supragingival\_plaque - SFS052876
- Supragingival\_plaque - SFS018665
- Supragingival\_plaque - SFS018337
- Supragingival\_plaque - SFS022536
- Supragingival\_plaque - SFS020340
- Supragingival\_plaque - SFS019980
- Supragingival\_plaque - SFS015378
- Supragingival\_plaque - SFS053630
- Supragingival\_plaque - SFS018778
- Supragingival\_plaque - SFS045313

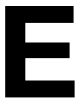

# Tongue Dorsum (16S)

Genera

Samples

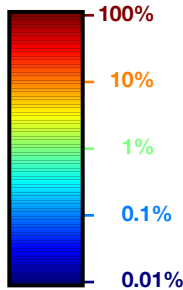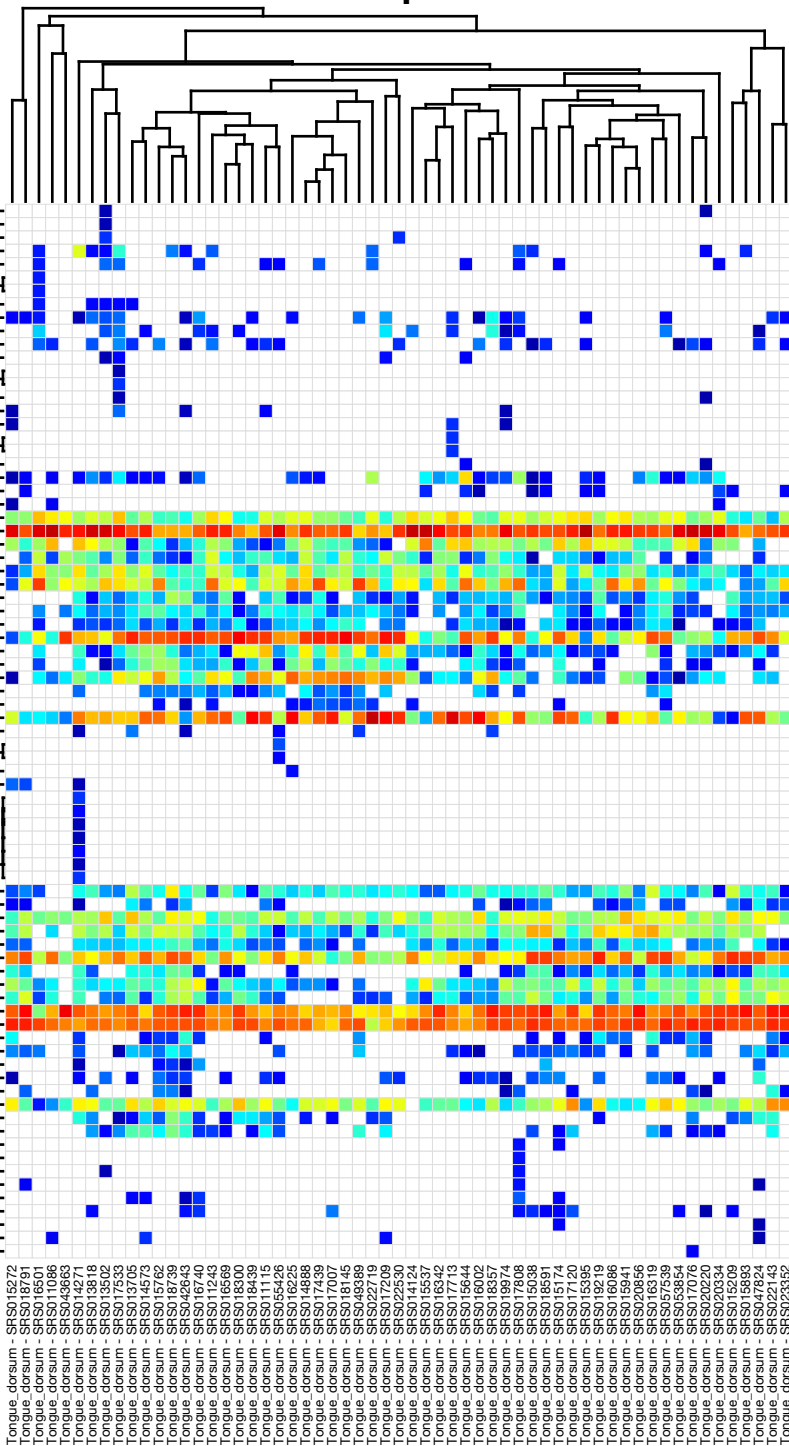

- Barnesiella
- Coprococcus
- Faecalibacterium
- Abiotrophia
- Aggregatibacter
- Blautia
- Methylobacterium
- Propionibacterium
- Bacteroides
- Pasteurella
- Kingella
- Cardiobacterium
- Enhydrobacter
- Helicobacter
- Parabacteroides
- Staphylococcus
- Cryptobacterium
- Bulleidia
- Lactococcus
- Alistipes
- Corynebacterium
- Lactobacillus
- Bifidobacterium
- Granulicatella
- Streptococcus
- Rothia
- Actinobacillus
- Gemella
- Haemophilus
- Eubacterium
- Peptostreptococcus
- Fillifactor
- Fusobacterium
- Capnocytophaga
- Parvimonas
- Porphyromonas
- Peptococcus
- Planobacterium
- Neisseria
- Anaerovorax
- Olsenella
- Slackia
- Moraxella
- Alloscardovia
- Pelomonas
- Hallella
- Truepera
- Phenylbacterium
- Pseudomonas
- Ralstonia
- Roseateles
- Catonella
- Butyrivibrio
- Oritacterium
- Campylobacter
- Mogibacterium
- Actinomyces
- Centipeda
- Atopobium
- Megasphaera
- Prevotella
- Veillonella
- Moryella
- Selenomonas
- Mobiluncus
- Syntrophococcus
- Dialister
- Leptotrichia
- Tannerella
- Treponema
- Anaeroglobus
- Shuttleworthia
- Ruminococcus
- Parasutterella
- Mycoplasma
- Solobacterium
- Mannheimia
- Simonsiella
- Sporacetigenium

Tongue\_dorsum - SRSO152722  
 Tongue\_dorsum - SRSO161791  
 Tongue\_dorsum - SRSO165001  
 Tongue\_dorsum - SRSO110886  
 Tongue\_dorsum - SRSO102563  
 Tongue\_dorsum - SRSO1404563  
 Tongue\_dorsum - SRSO138118  
 Tongue\_dorsum - SRSO135002  
 Tongue\_dorsum - SRSO175533  
 Tongue\_dorsum - SRSO137005  
 Tongue\_dorsum - SRSO145762  
 Tongue\_dorsum - SRSO1501762  
 Tongue\_dorsum - SRSO167789  
 Tongue\_dorsum - SRSO426643  
 Tongue\_dorsum - SRSO16740  
 Tongue\_dorsum - SRSO11243  
 Tongue\_dorsum - SRSO116569  
 Tongue\_dorsum - SRSO184389  
 Tongue\_dorsum - SRSO184389  
 Tongue\_dorsum - SRSO111115  
 Tongue\_dorsum - SRSO55426  
 Tongue\_dorsum - SRSO16225  
 Tongue\_dorsum - SRSO14888  
 Tongue\_dorsum - SRSO17007  
 Tongue\_dorsum - SRSO18145  
 Tongue\_dorsum - SRSO48389  
 Tongue\_dorsum - SRSO22719  
 Tongue\_dorsum - SRSO7209  
 Tongue\_dorsum - SRSO14124  
 Tongue\_dorsum - SRSO15537  
 Tongue\_dorsum - SRSO16342  
 Tongue\_dorsum - SRSO17713  
 Tongue\_dorsum - SRSO156044  
 Tongue\_dorsum - SRSO156044  
 Tongue\_dorsum - SRSO18357  
 Tongue\_dorsum - SRSO18974  
 Tongue\_dorsum - SRSO17808  
 Tongue\_dorsum - SRSO15038  
 Tongue\_dorsum - SRSO18591  
 Tongue\_dorsum - SRSO17120  
 Tongue\_dorsum - SRSO15385  
 Tongue\_dorsum - SRSO19219  
 Tongue\_dorsum - SRSO16066  
 Tongue\_dorsum - SRSO15941  
 Tongue\_dorsum - SRSO16319  
 Tongue\_dorsum - SRSO57639  
 Tongue\_dorsum - SRSO53854  
 Tongue\_dorsum - SRSO17076  
 Tongue\_dorsum - SRSO20220  
 Tongue\_dorsum - SRSO15209  
 Tongue\_dorsum - SRSO15209  
 Tongue\_dorsum - SRSO15893  
 Tongue\_dorsum - SRSO47824  
 Tongue\_dorsum - SRSO22143  
 Tongue\_dorsum - SRSO202352

F



# H

# Genera

# Anterior Nares

# Samples

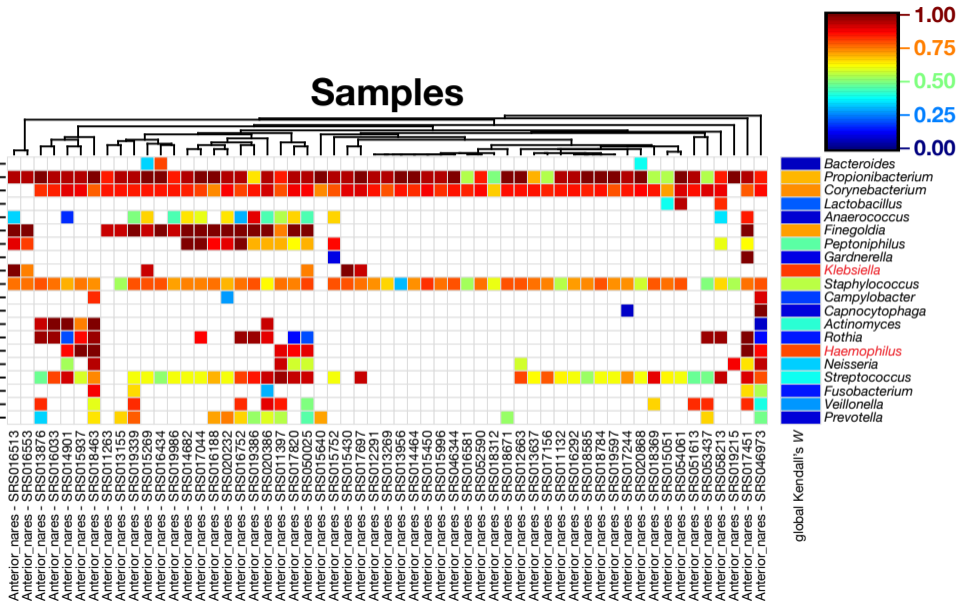



Genera

Buccal  
Mucosa

Samples

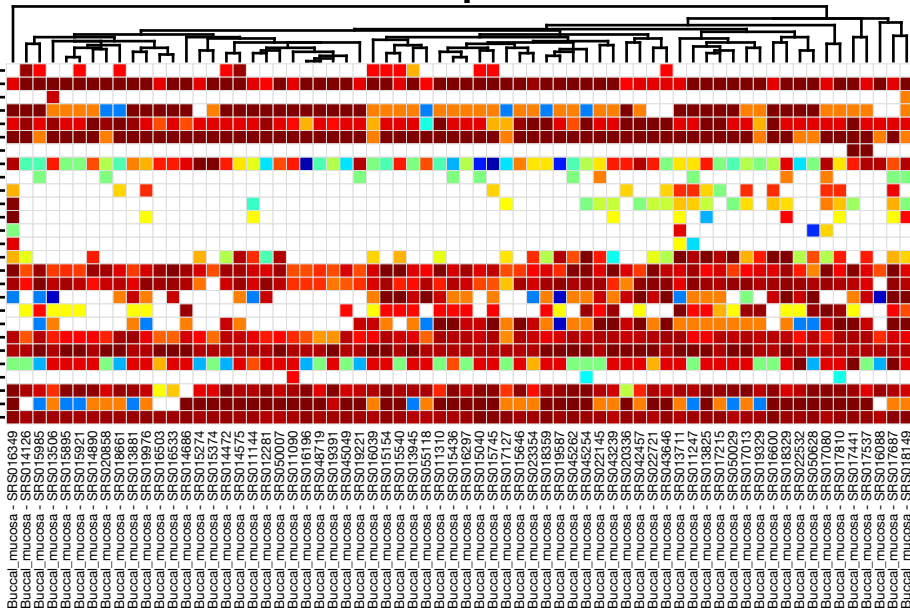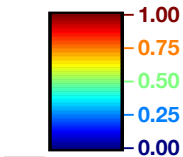

- Acidovorax*
- Actinobacillus*
- Enterococcus*
- Capnocytophaga*
- Actinomyces*
- Aggregatibacter*
- Helicobacter*
- Veillonella*
- Lactococcus*
- Eubacterium*
- Bacteroides*
- Parabacteroides*
- Clostridium*
- Ruminococcus*
- Propionibacterium*
- Campylobacter*
- Fusobacterium*
- Selenomonas*
- Peptoniphilus*
- Porphyromonas*
- Prevotella*
- Haemophilus*
- Rothia*
- Lactobacillus*
- Neisseria*
- Leptotrichia*
- Streptococcus*

global Kendall's  $W$

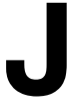

Genera

Posterior  
Fornix

Samples

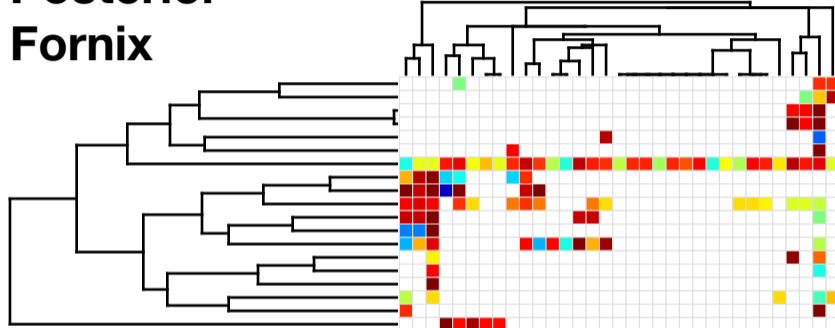

Posterior\_fornix - SRS011269  
Posterior\_fornix - SRS013542  
Posterior\_fornix - SRS017497  
Posterior\_fornix - SRS015054  
Posterior\_fornix - SRS016191  
Posterior\_fornix - SRS015225  
Posterior\_fornix - SRS015425  
Posterior\_fornix - SRS016111  
Posterior\_fornix - SRS011355  
Posterior\_fornix - SRS015168  
Posterior\_fornix - SRS017700  
Posterior\_fornix - SRS011584  
Posterior\_fornix - SRS019379  
Posterior\_fornix - SRS051505  
Posterior\_fornix - SRS019989  
Posterior\_fornix - SRS020349  
Posterior\_fornix - SRS012294  
Posterior\_fornix - SRS016516  
Posterior\_fornix - SRS016559  
Posterior\_fornix - SRS052330  
Posterior\_fornix - SRS017520  
Posterior\_fornix - SRS019600  
Posterior\_fornix - SRS022158  
Posterior\_fornix - SRS022734  
Posterior\_fornix - SRS022545  
Posterior\_fornix - SRS014629  
Posterior\_fornix - SRS056695  
Posterior\_fornix - SRS057807  
Posterior\_fornix - SRS042428  
Posterior\_fornix - SRS014494  
Posterior\_fornix - SRS018769  
Posterior\_fornix - SRS056796  
Posterior\_fornix - SRS050184

global Kendall's W

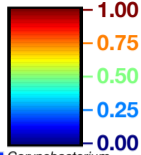

- Corynebacterium*
- Neisseria*
- Eubacterium*
- Parabacteroides*
- Clostridium*
- Propionibacterium*
- Lactobacillus*
- Anaerococcus*
- Finegoldia*
- Prevotella*
- Atopobium*
- Peptoniphilus*
- Gardnerella*
- Bacteroides*
- Fusobacterium*
- Leptotrichia*
- Streptococcus*
- Veillonella*
- Pseudomonas*

# Supragingival Plaque

Genera

Samples

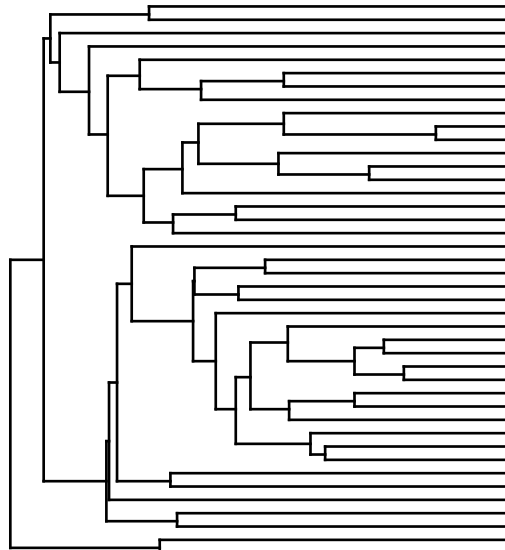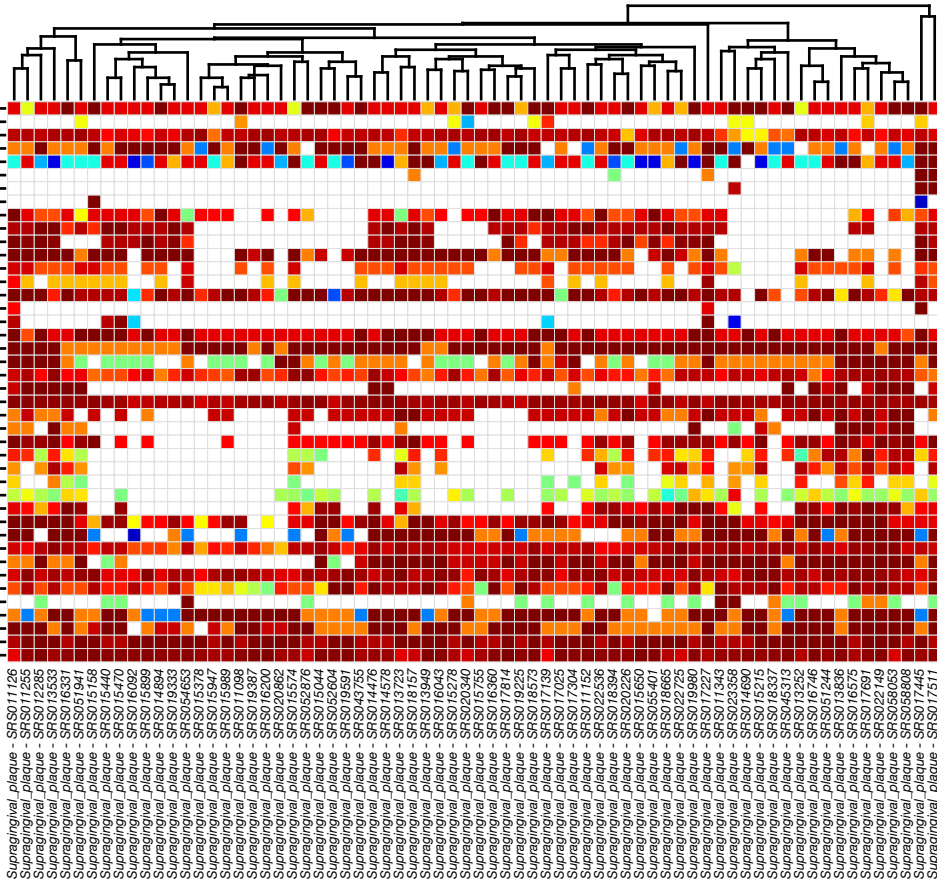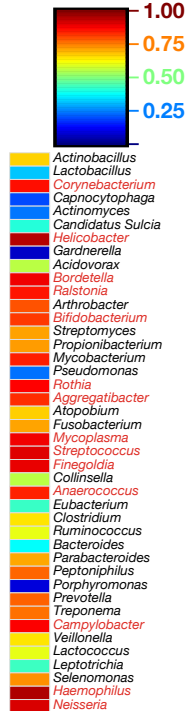

global Kendall's W

- Actinobacillus
- Lactobacillus
- Corynebacterium
- Capnocytophaga
- Actinomyces
- Candidatus Sulcia
- Helicobacter
- Gardnerella
- Acidovorax
- Bordetella
- Ralstonia
- Arthrobacter
- Bifidobacterium
- Streptomyces
- Propionibacterium
- Mycobacterium
- Pseudomonas
- Rothia
- Aggregatibacter
- Atopobium
- Fusobacterium
- Mycoplasma
- Streptococcus
- Finegoldia
- Collinsella
- Anaerococcus
- Eubacterium
- Clostridium
- Ruminococcus
- Bacteroides
- Parabacteroides
- Peptoniphilus
- Porphyromonas
- Prevotella
- Treponema
- Campylobacter
- Veillonella
- Lactococcus
- Leptotrichia
- Selenomonas
- Haemophilus
- Neisseria

K

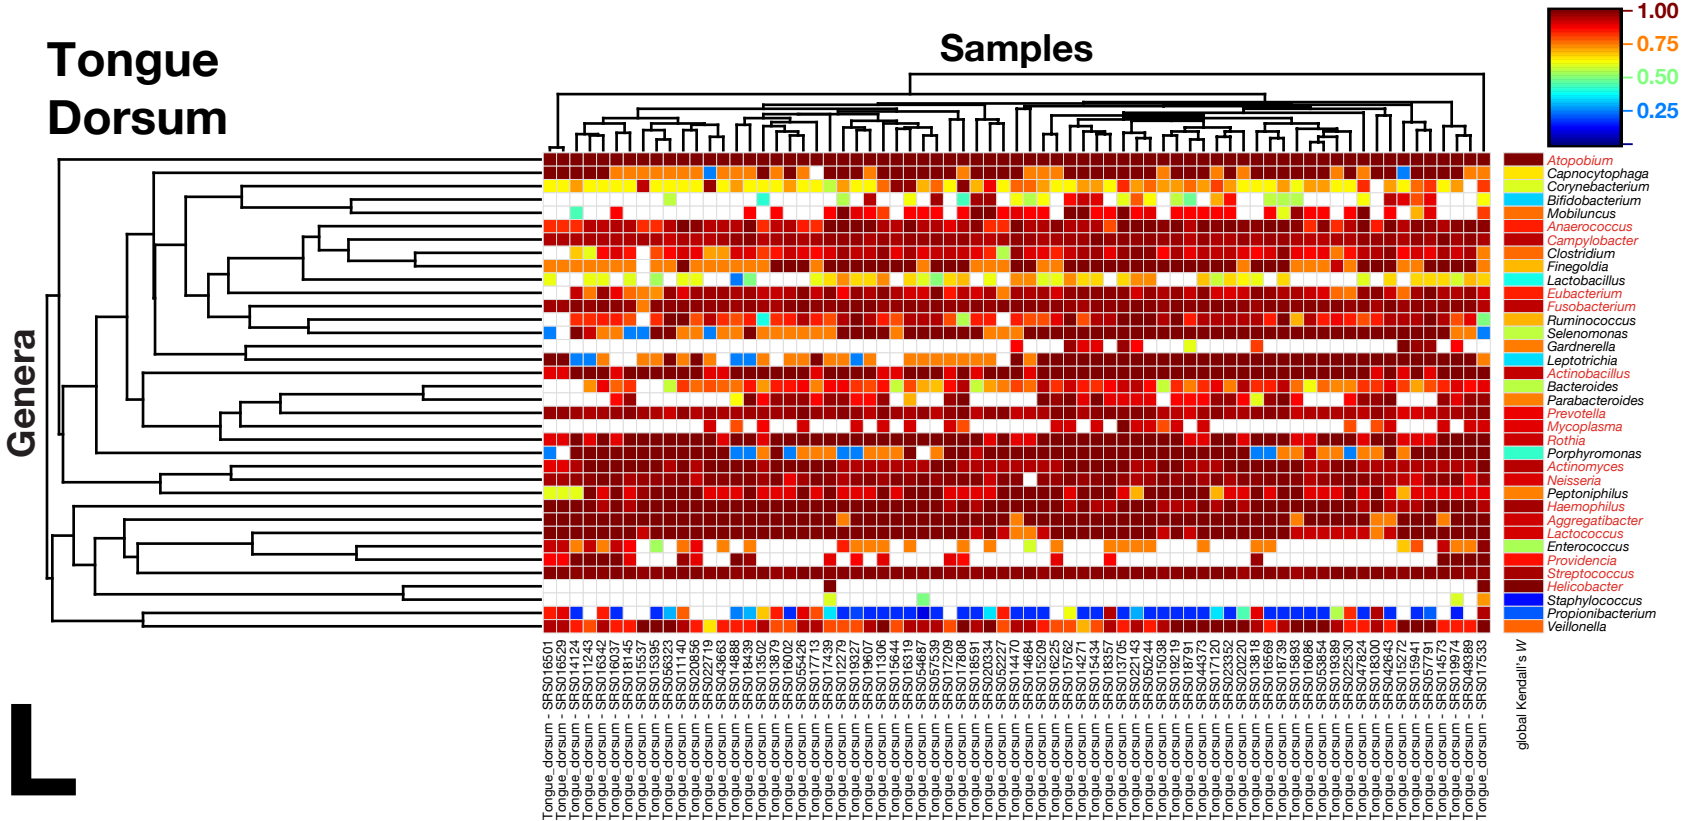

Supplement: pone.0097279.s007.pdf [file pone.0097279.s007.pdf]
