# Supplementary material for: The Prevalence of Species and Strains in the Human Microbiome: A Resource for Experimental Efforts
Source: PubMed Central journal article supplement (PMC4020798; doi:10.1371/journal.pone.0097279), 2014-05-14

All Body Sites

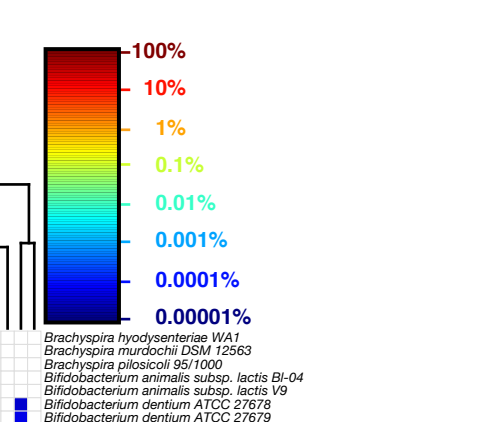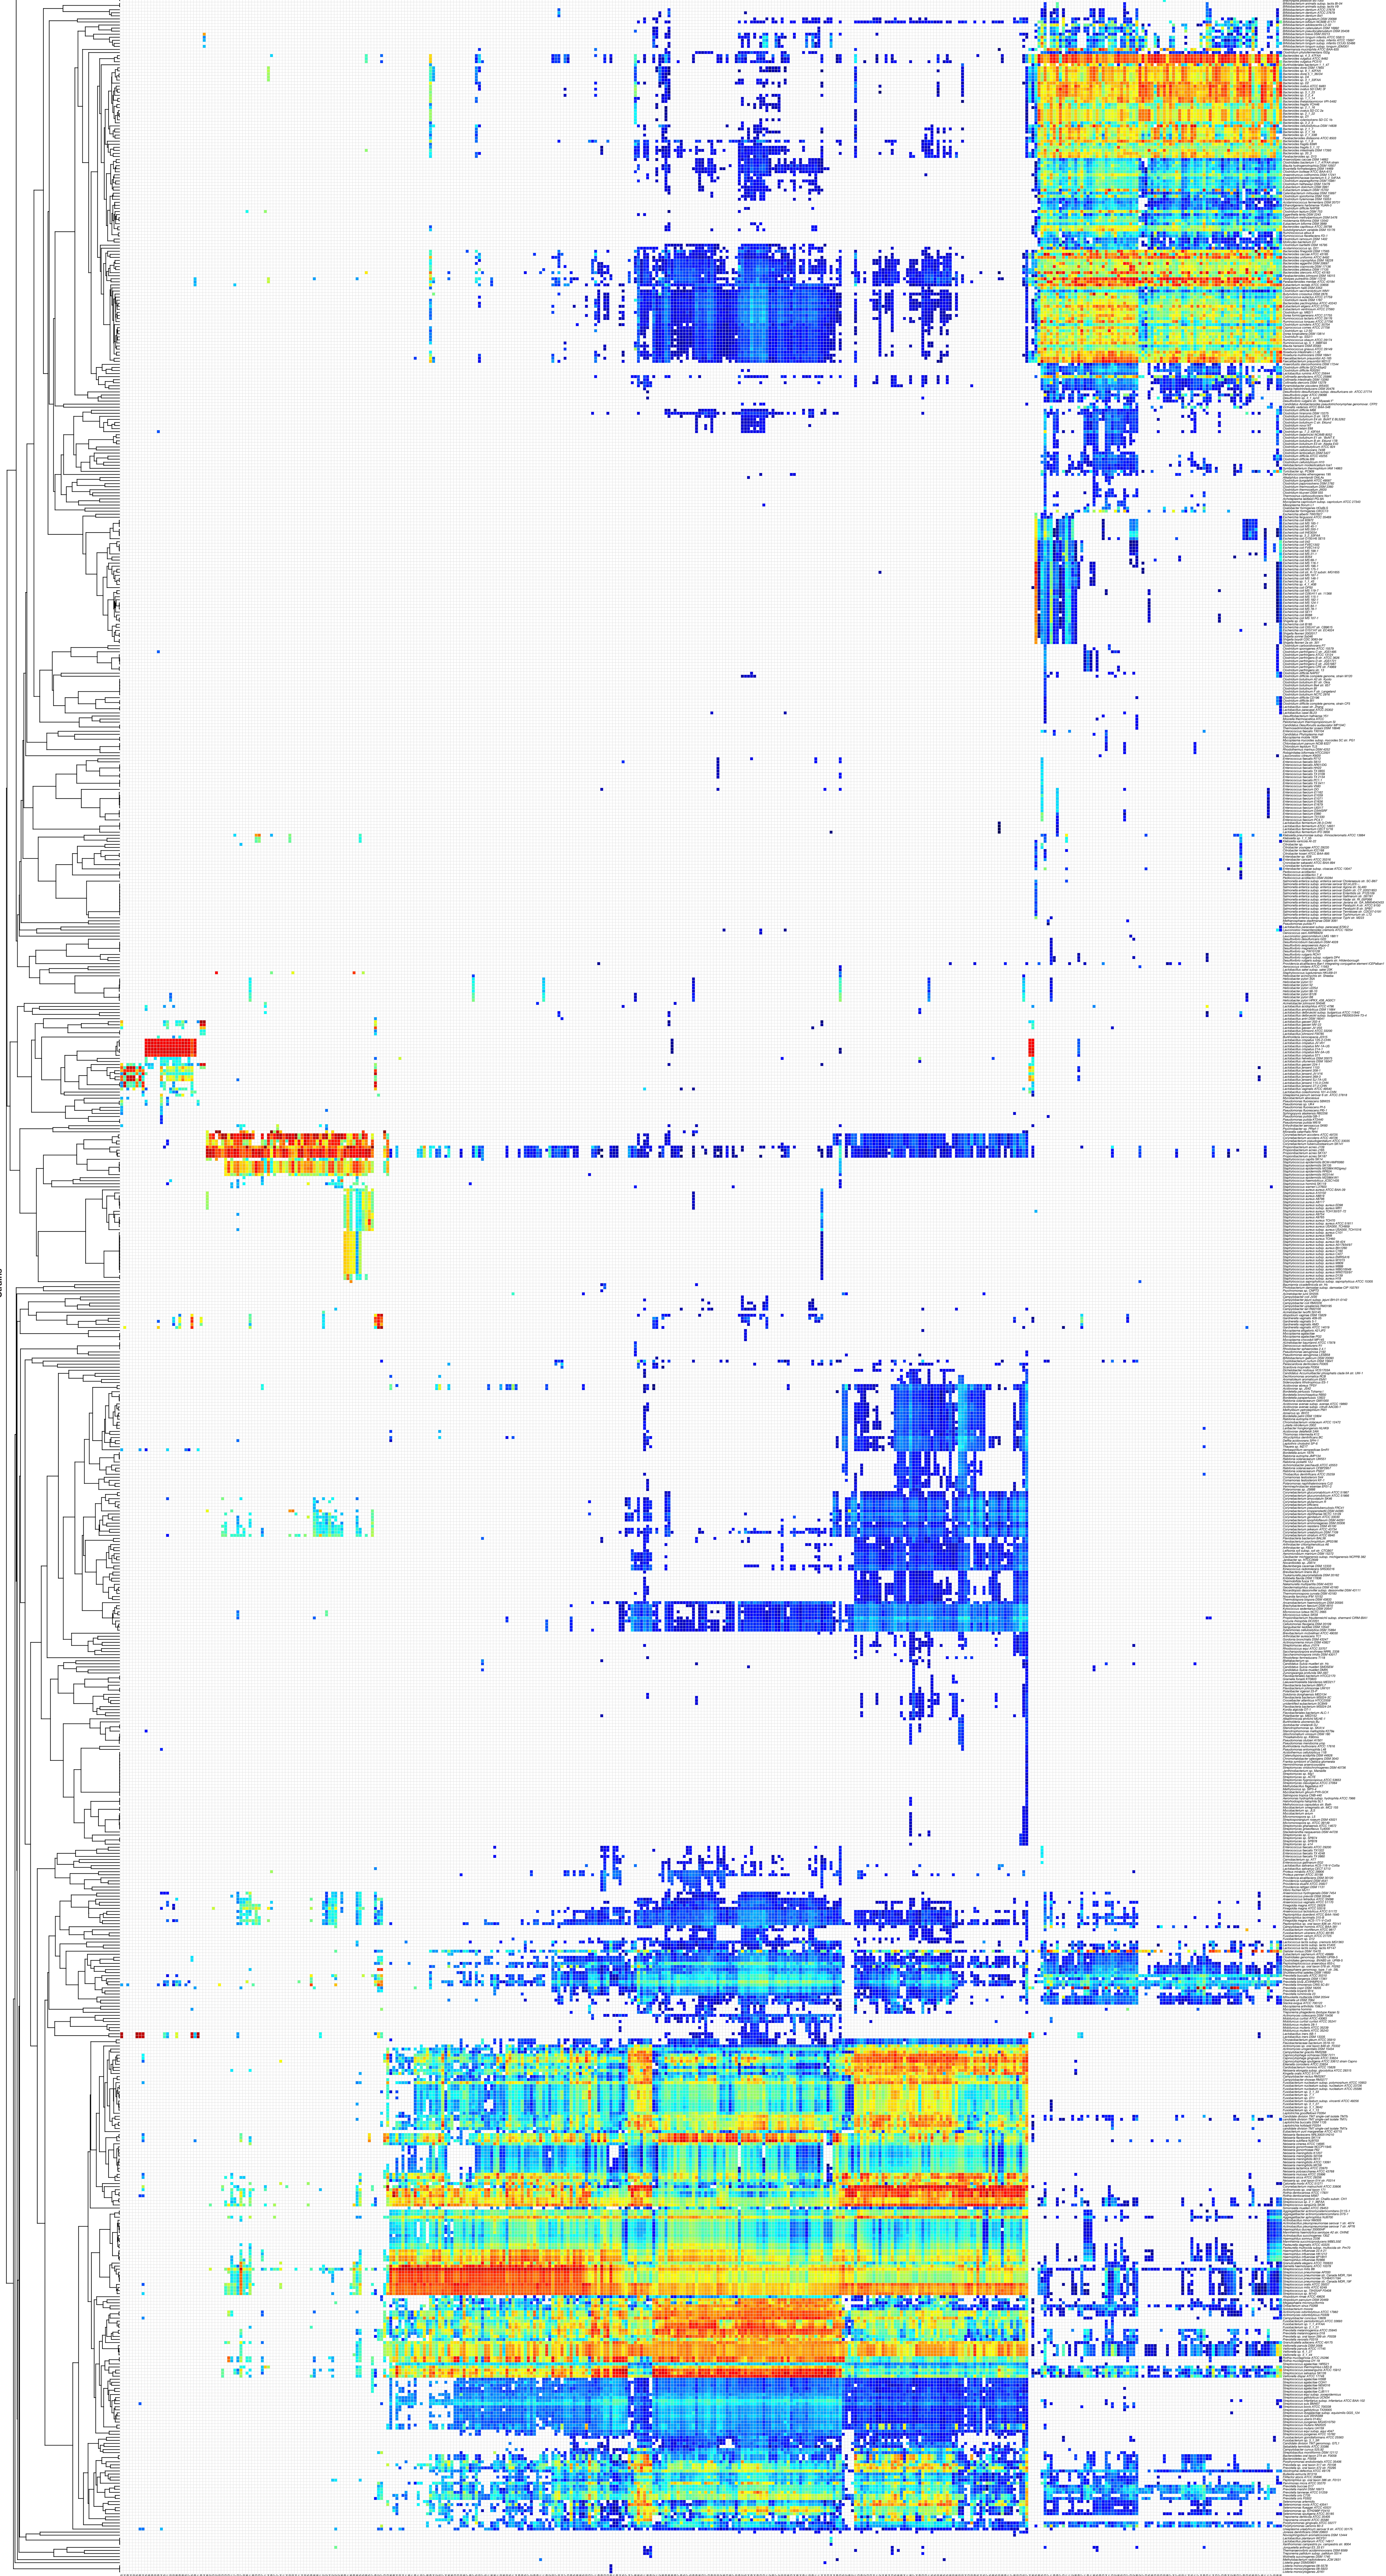

Supplement: pone.0097279.s003.pdf [file pone.0097279.s003.pdf]
