# Supplementary material for: The Prevalence of Species and Strains in the Human Microbiome: A Resource for Experimental Efforts
Source: PubMed Central journal article supplement (PMC4020798; doi:10.1371/journal.pone.0097279), 2014-05-14
Supplement: pone.0097279.s004.pdf [file pone.0097279.s004.pdf]

# Anterior Nares

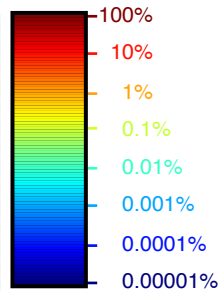

## Strains

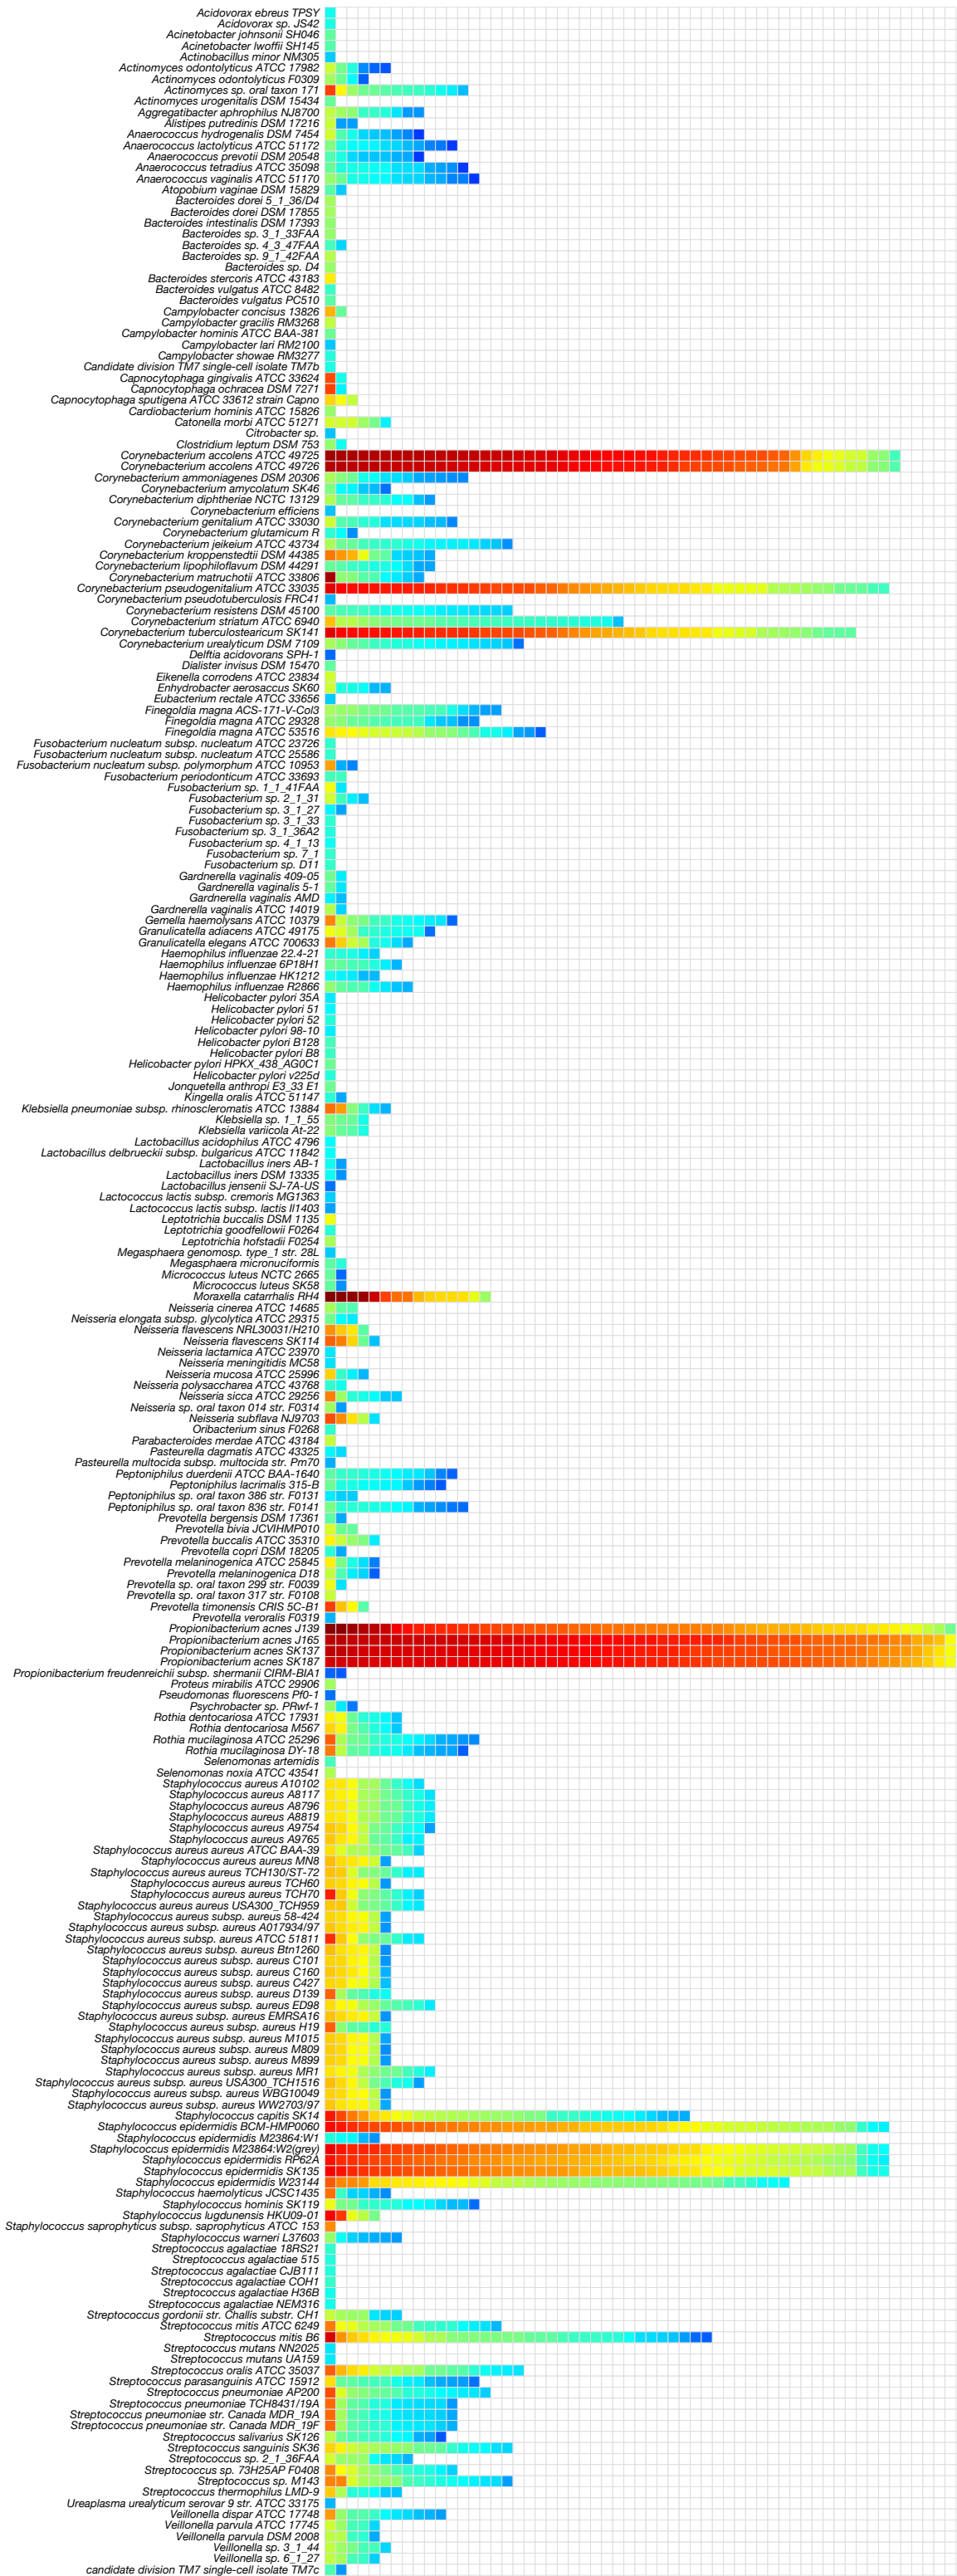

# Buccal Mucosa

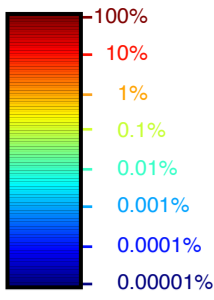

## Strains

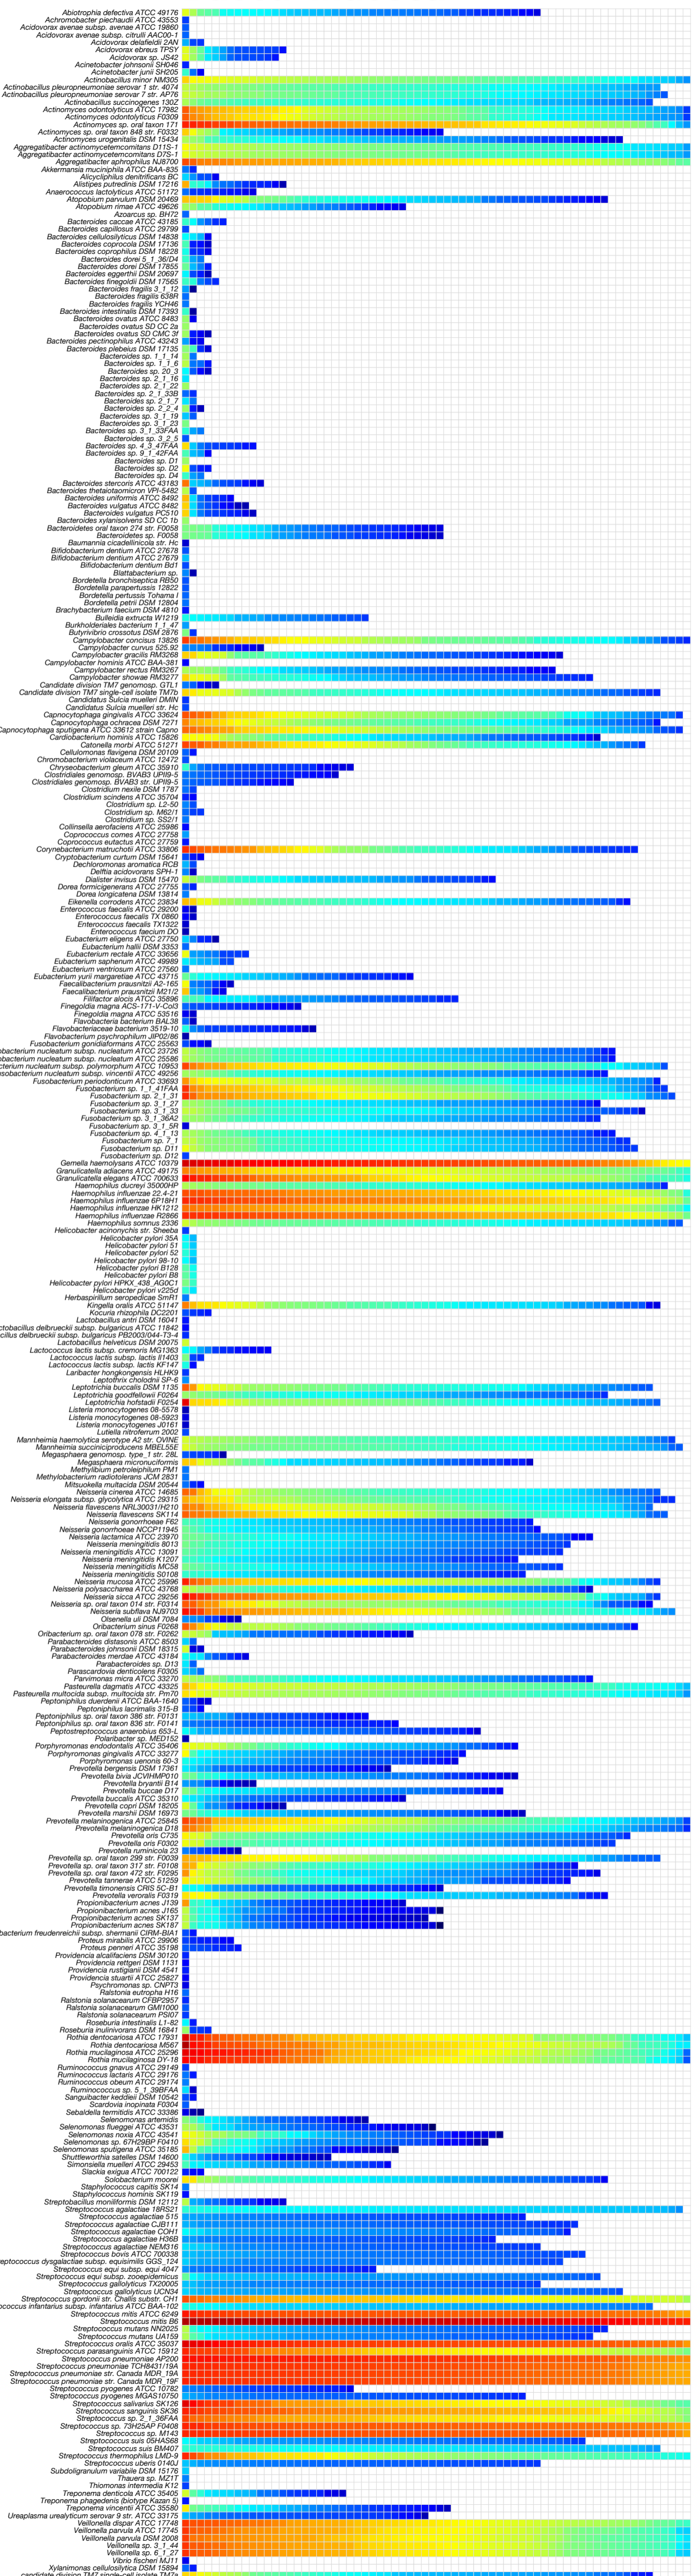

# Stool

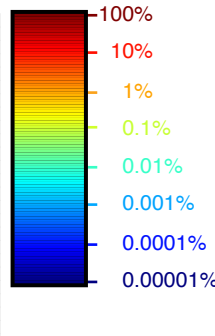

## Strains

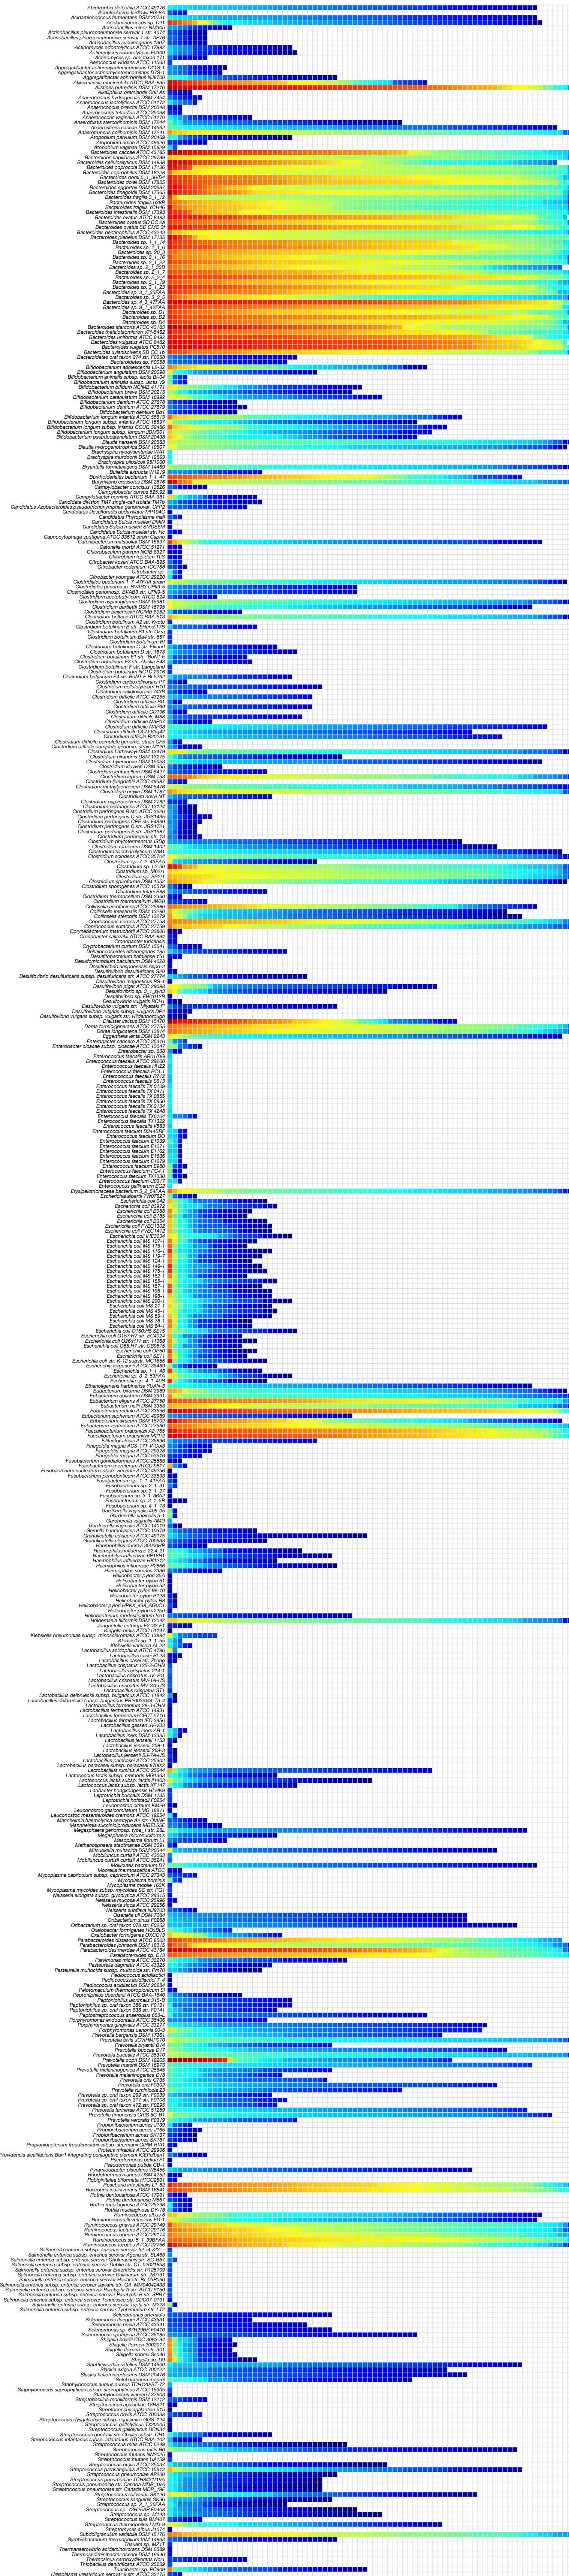

100%  
10%  
1%  
0.1%  
0.01%  
0.001%  
0.0001%  
0.00001%

100%  
10%  
1%  
0.1%  
0.01%  
0.001%  
0.0001%  
0.00001%

# Posterior Fornix

Strains

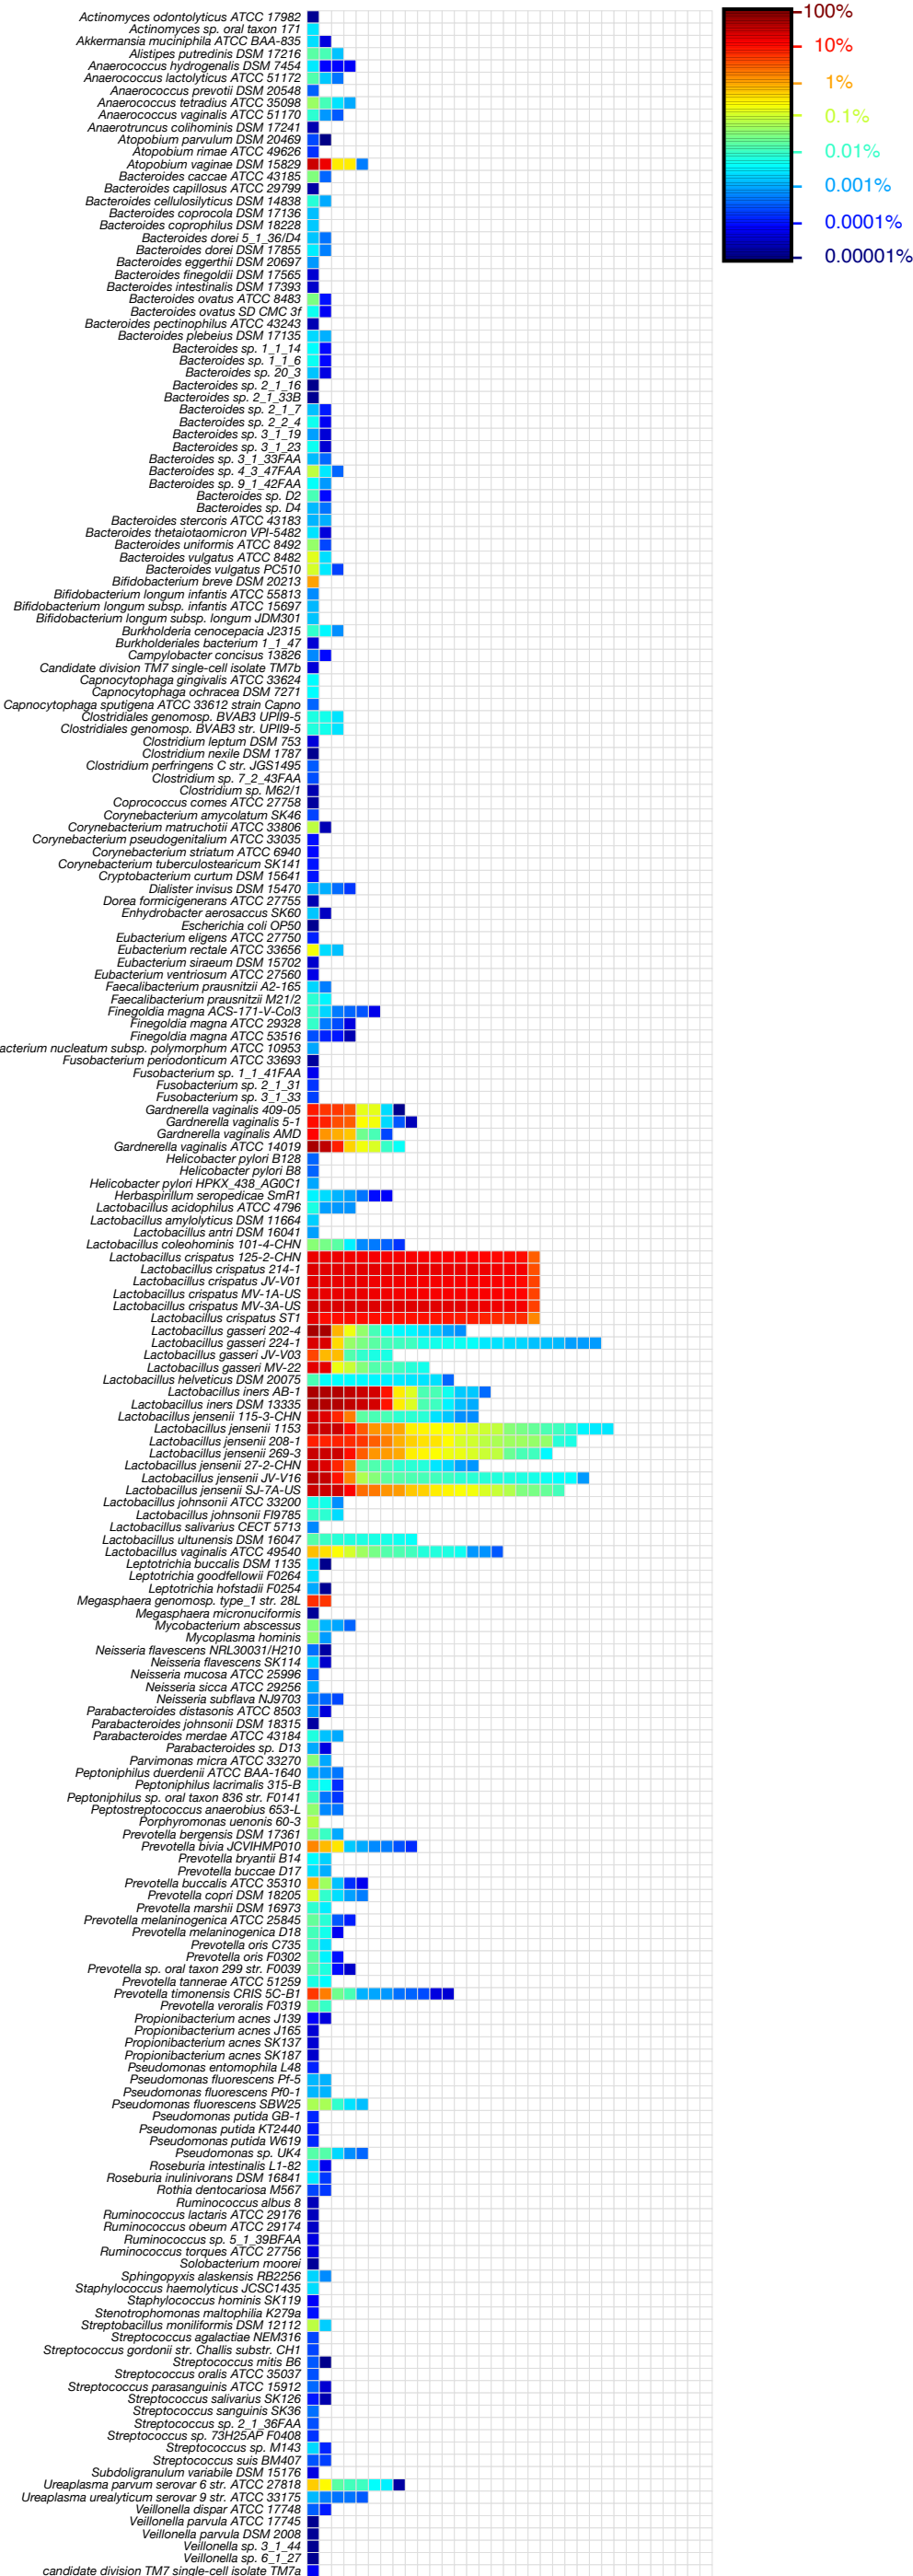

# Supragingival Plaque

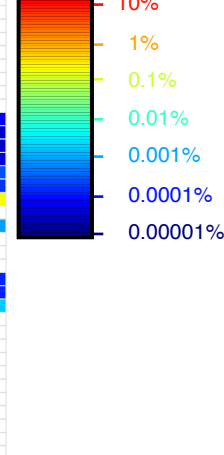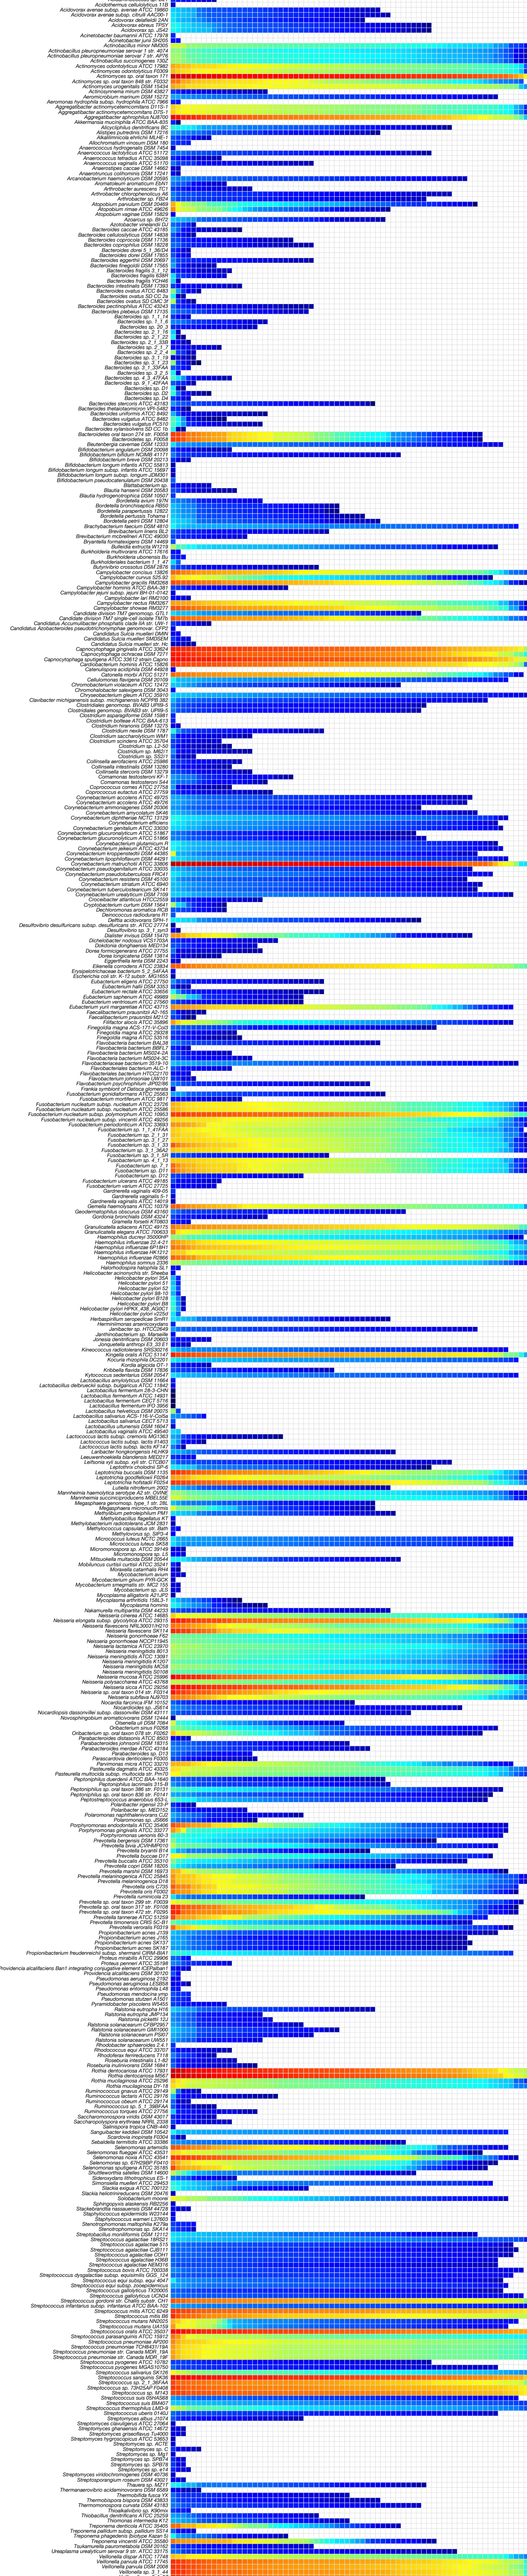

Strains
