# Supplementary material for: The Prevalence of Species and Strains in the Human Microbiome: A Resource for Experimental Efforts
Source: PubMed Central journal article supplement (PMC4020798; doi:10.1371/journal.pone.0097279), 2014-05-14
Supplement: pone.0097279.s010.pdf [file pone.0097279.s010.pdf]

# Buccal Mucosa

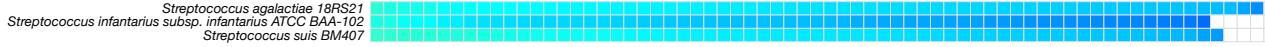

# Stool

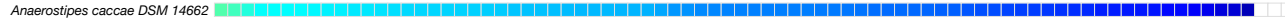

# Supragingival Plaque

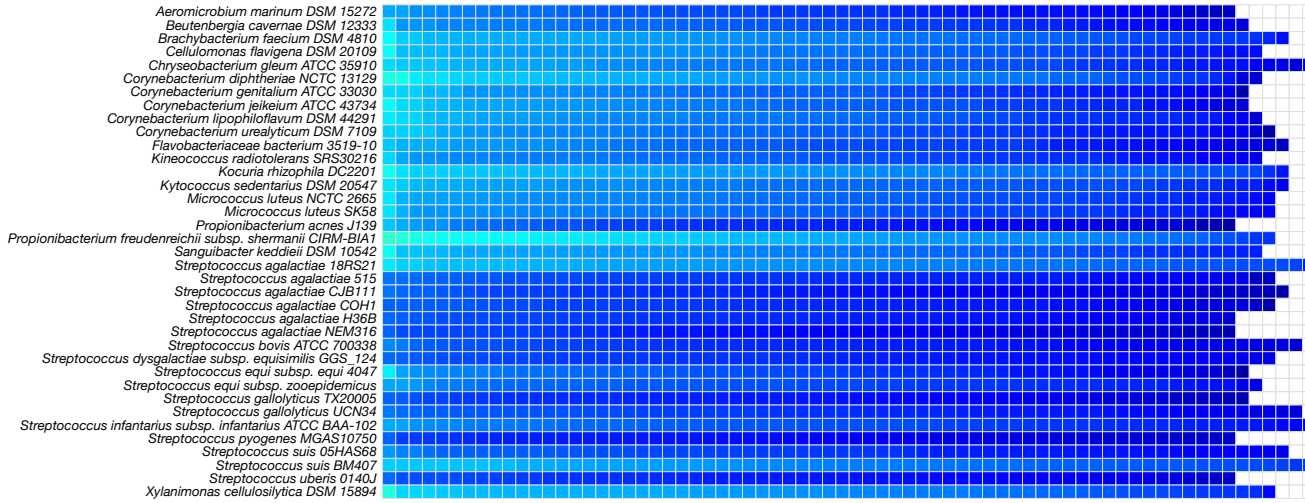

# Tongue Dorsum

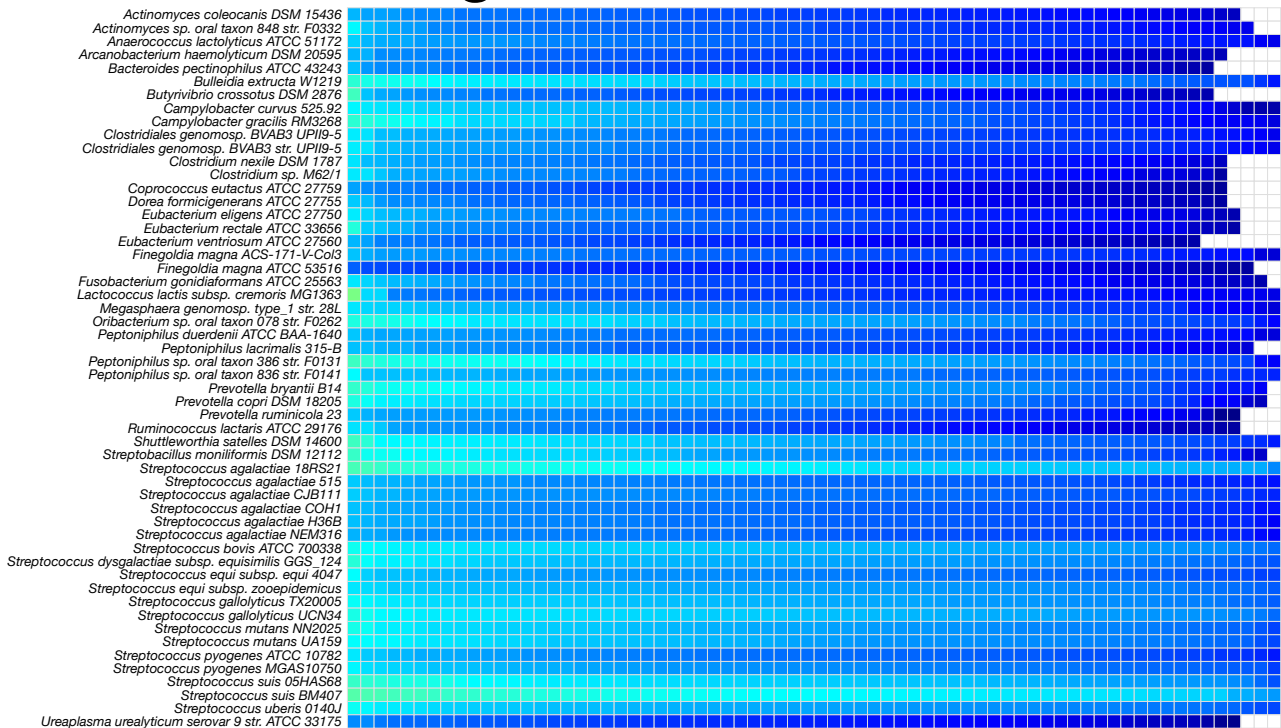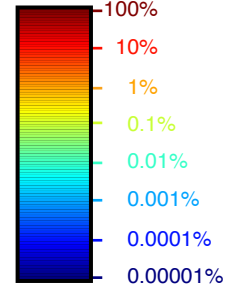

A

# Buccal Mucosa

*Actinobacillus pleuropneumoniae* serovar 1 str. 4074  
*Aggregatibacter actinomycetemcomitans* D11S-1  
*Aggregatibacter actinomycetemcomitans* D7S-1  
*Haemophilus ducreyi* 35000HP  
*Haemophilus somnus* 2336  
*Mannheimia succiniciproducens* MBEL55E

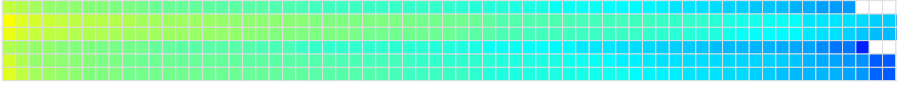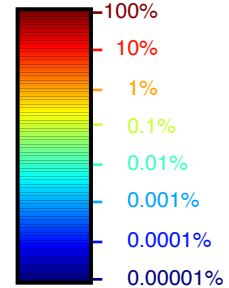

# Stool

*Bacteroides fragilis* 3\_1\_12  
*Blautia hansenii* DSM 20583  
*Clostridium scindens* ATCC 35704  
*Eubacterium dolichum* DSM 3991  
*Prevotella bivia* JCVIHMPO10  
*Prevotella buccalis* ATCC 35310

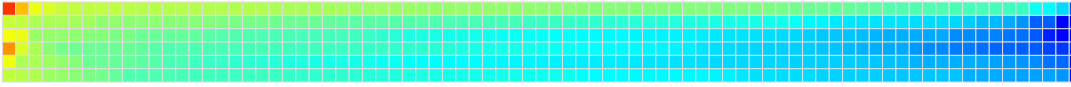

# Supragingival Plaque

*Actinobacillus pleuropneumoniae* serovar 1 str. 4074  
*Actinobacillus pleuropneumoniae* serovar 7 str. AP76  
*Actinobacillus succinigenes* 130Z  
*Haemophilus somnus* 2336  
*Mannheimia haemolytica* serotype A2 str. OVINE  
*Mannheimia succiniciproducens* MBEL55E  
*Neisseria lactamica* ATCC 23970  
*Pasteurella multocida* subsp. *multocida* str. Pm70  
*Streptococcus salivarius* SK126  
*Streptococcus thermophilus* LMD-9

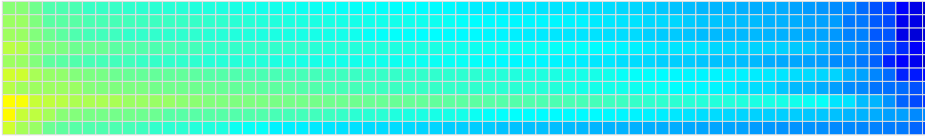

# Tongue Dorsum

*Actinomyces urogenitalis* DSM 15434  
*Filifactor alocis* ATCC 35896  
*Fusobacterium nucleatum* subsp. *vincentii* ATCC 49256  
*Fusobacterium* sp. 3\_1\_33  
*Fusobacterium* sp. 4\_1\_13  
*Fusobacterium* sp. 7\_1  
*Fusobacterium* sp. D11  
*Granulicatella elegans* ATCC 700633  
*Haemophilus somnus* 2336  
*Mannheimia succiniciproducens* MBEL55E  
*Peptostreptococcus anaerobius* 653-L  
*Prevotella bergensis* DSM 17361  
*Prevotella bivia* JCVIHMPO10  
*Prevotella buccae* D11  
*Prevotella buccalis* ATCC 35310  
*Prevotella marshii* DSM 16973  
*Prevotella timonensis* CRIS 5C-B1  
*Streptococcus infantarius* subsp. *infantarius* ATCC BAA-102

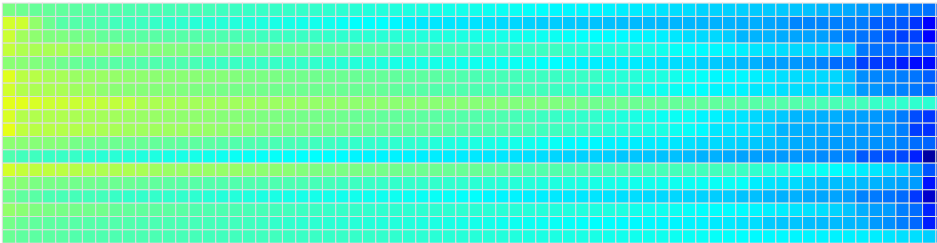

**B**

# Buccal Mucosa

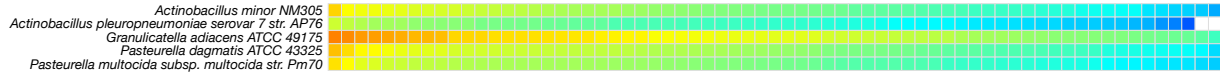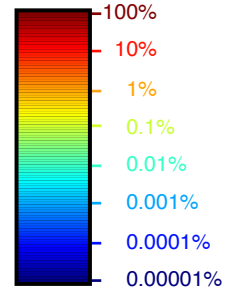

# Stool

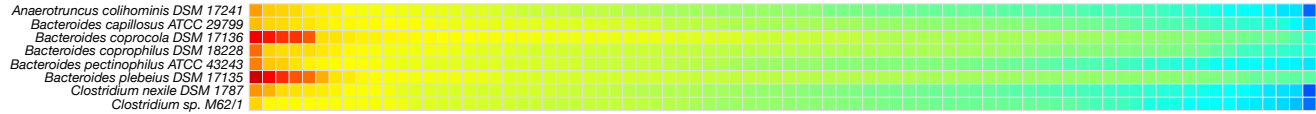

# Supragingival Plaque

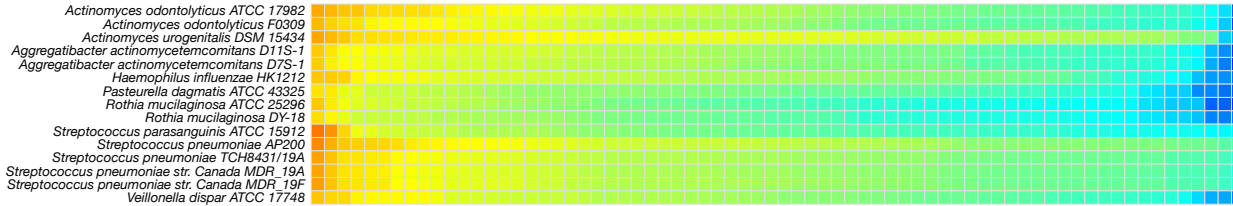

# Tongue Dorsum

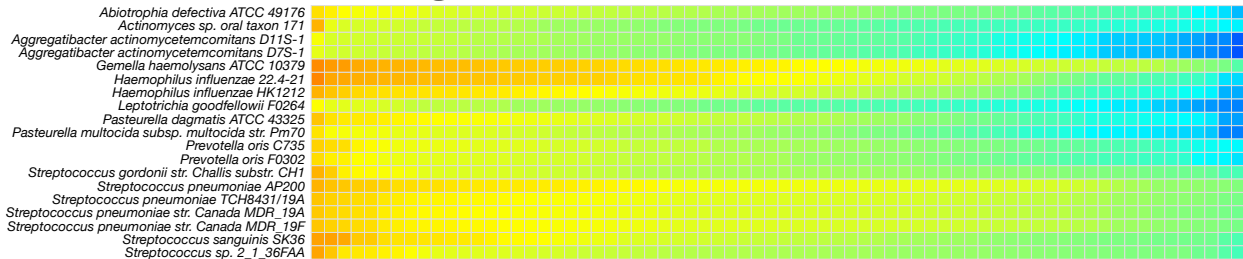

C
